# Supplementary material for: Genome-wide association study of the antibody response to Corynebacterium pseudotuberculosis in sheep
Source: Copernicus journal article supplement (doi:10.5194/aab-68-109-2025), 2025-02-11
Supplement: Supplementary file 1 [file aab-68-109-2025-supplement.zip]

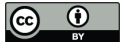

*Supplement of*

## **Genome-wide association study of the antibody response to *Corynebacterium pseudotuberculosis* in sheep**

**Jitka Kyselová et al.**

*Correspondence to:* Jitka Kyselová ([kyselova.jitka@vuzv.cz](mailto:kyselova.jitka@vuzv.cz))

- [aab-68-109-2025-supplement-title-page.pdf](#)
- [Supplementary material Fig.S1-Fig.S4.docx](#)
- [Supplementary table S1 fin.xlsx](#)

The copyright of individual parts of the supplement might differ from the article licence.
