# Supplementary material for: Genome-wide association study of the antibody response to Corynebacterium pseudotuberculosis in sheep
Source: Copernicus journal article supplement (doi:10.5194/aab-68-109-2025), 2025-02-11
Supplement: Supplementary file 1 [file aab-68-109-2025-supplement.zip]

## Sheet: Ensembl VEP_OarRamb2 position
Supplementary Table S1. Survey of the CLA associated SNP markers according to their p value (p< 0.05) determined by the GWAS. Variant effect predictor was used for SNPs assingment on ENSEMBL ARS-UI Ramb v2 ovine reference.
SNP name	praw value	A1-negative animals	A2-negative animals	MAF-negative animals	A1-positive animals	A2-positive animals	MAF-diseased	Allelic frequency difference between positive and negative ewes	Chromosome	Coordinate	IMPACT	SYMBOL	Gene	Feature_type	Feature	BIOTYPE	EXON	INTRON	HGVSc	HGVSp	cDNA_position	CDS_position	Protein_position	Amino_acids	Codons	Existing_variation	REF_ALLELE	UPLOADED_ALLELE	DISTANCE	STRAND	FLAGS	SYMBOL_SOURCE	HGNC_ID	MANE_SELECT	MANE_PLUS_CLINICAL	TSL	APPRIS	SIFT	CLIN_SIG	SOMATIC	PHENO
Chr11:32608530	1.49E-05	G	A	0.4454	A	G	0.4007	0.1539	11	32814646	MODERATE	TRIM16	ENSOARG00020012198	Transcript	ENSOART00020018778.2	protein_coding	1/5	-	-	-	231	32	11	P/L	cCg/cTg	rs417000265	G	G/A	-	-1	-	HGNC	HGNC:17241	-	-	-	-	deleterious(0)	-	-	-
Chr11:32608530	1.49E-05	G	A	0.4454	A	G	0.4007	0.1539	11	32814646	MODERATE	TRIM16	ENSOARG00020012198	Transcript	ENSOART00020075825.1	protein_coding	1/7	-	-	-	70	32	11	P/L	cCg/cTg	rs417000265	G	G/A	-	-1	-	HGNC	HGNC:17241	-	-	-	-	deleterious(0)	-	-	-
Chr20:7010930	3.41E-05	A	G	0.3356	A	G	0.48	0.1444	20	7059483	MODIFIER	-	-	-	-	-	-	-	-	-	-	-	-	-	-	-	A	A/G	-	-	-	-	-	-	-	-	-	-	-	-	-
Chr21:21290371	0.000119469	A	G	0.1449	A	G	0.05986	0.08504	21	19485353	MODIFIER	-	-	-	-	-	-	-	-	-	-	-	-	-	-	-	A	A/G	-	-	-	-	-	-	-	-	-	-	-	-	-
s18456.1	0.000167148	C	T	0.4185	T	C	0.4401	0.1414	3	37298615	MODIFIER	LCLAT1	ENSOARG00020005419	Transcript	ENSOART00020008303.2	protein_coding	1/8	-	-	-	4	-	-	-	-	-	C	C/T	-	1	-	HGNC	HGNC:26756	-	-	-	-	-	-	-	-
s18456.1	0.000167148	C	T	0.4185	T	C	0.4401	0.1414	3	37298615	MODIFIER	LCLAT1	ENSOARG00020005419	Transcript	ENSOART00020061500.1	protein_coding	1/7	-	-	-	4	-	-	-	-	-	C	C/T	-	1	-	HGNC	HGNC:26756	-	-	-	-	-	-	-	-
OAR16_21164614.1	0.000258709	T	C	0.4719	T	C	0.3322	0.1397	16	19336401	MODIFIER	-	ENSOARG00020040960	Transcript	ENSOART00020056690.1	protein_coding	-	1/1	-	-	-	-	-	-	-	rs420366619	T	T/C	-	1	-	-	-	-	-	-	-	-	-	-	-
oar3_OAR2_220748157	0.000285668	T	C	0.4494	C	T	0.3881	0.1625	2	221761116	MODIFIER	-	-	-	-	-	-	-	-	-	-	-	-	-	-	-	T	T/C	-	-	-	-	-	-	-	-	-	-	-	-	-
oar3_OAR16_71157971	0.000333395	C	A	0.1011	C	A	0.2063	0.1052	16	70727061	MODIFIER	-	-	-	-	-	-	-	-	-	-	-	-	-	-	rs417245759	C	C/A	-	-	-	-	-	-	-	-	-	-	-	-	-
s39032.1	0.000362361	G	A	0.4494	G	A	0.2832	0.1662	18	11804449	MODIFIER	-	ENSOARG00020029714	Transcript	ENSOART00020079205.1	lncRNA	-	-	-	-	-	-	-	-	-	rs399452143	G	G/A	3555	-1	-	-	-	-	-	-	-	-	-	-	-
oar3_OAR9_32239318	0.000423029	C	T	0.2949	C	T	0.4161	0.1212	9	32415110	MODIFIER	SPIDR	ENSOARG00020009892	Transcript	ENSOART00020015164.2	protein_coding	-	1/20	-	-	-	-	-	-	-	rs415550708	C	C/T	-	-1	-	HGNC	HGNC:28971	-	-	-	-	-	-	-	-
oar3_OAR9_32239318	0.000423029	C	T	0.2949	C	T	0.4161	0.1212	9	32415110	MODIFIER	SPIDR	ENSOARG00020009892	Transcript	ENSOART00020015173.2	protein_coding	-	1/19	-	-	-	-	-	-	-	rs415550708	C	C/T	-	-1	-	HGNC	HGNC:28971	-	-	-	-	-	-	-	-
oar3_OAR9_32239318	0.000423029	C	T	0.2949	C	T	0.4161	0.1212	9	32415110	MODIFIER	SPIDR	ENSOARG00020009892	Transcript	ENSOART00020015197.2	protein_coding	-	1/14	-	-	-	-	-	-	-	rs415550708	C	C/T	-	-1	-	HGNC	HGNC:28971	-	-	-	-	-	-	-	-
oar3_OAR9_32239318	0.000423029	C	T	0.2949	C	T	0.4161	0.1212	9	32415110	MODIFIER	SPIDR	ENSOARG00020009892	Transcript	ENSOART00020046063.1	protein_coding	-	1/5	-	-	-	-	-	-	-	rs415550708	C	C/T	-	-1	-	HGNC	HGNC:28971	-	-	-	-	-	-	-	-
oar3_OAR9_32239318	0.000423029	C	T	0.2949	C	T	0.4161	0.1212	9	32415110	MODIFIER	SPIDR	ENSOARG00020009892	Transcript	ENSOART00020065039.1	protein_coding	-	1/18	-	-	-	-	-	-	-	rs415550708	C	C/T	-	-1	-	HGNC	HGNC:28971	-	-	-	-	-	-	-	-
oar3_OAR9_32239318	0.000423029	C	T	0.2949	C	T	0.4161	0.1212	9	32415110	MODIFIER	SPIDR	ENSOARG00020009892	Transcript	ENSOART00020067764.1	protein_coding	-	1/5	-	-	-	-	-	-	-	rs415550708	C	C/T	-	-1	-	HGNC	HGNC:28971	-	-	-	-	-	-	-	-
oar3_OAR9_32239318	0.000423029	C	T	0.2949	C	T	0.4161	0.1212	9	32415110	MODIFIER	SPIDR	ENSOARG00020009892	Transcript	ENSOART00020078738.1	protein_coding	-	1/18	-	-	-	-	-	-	-	rs415550708	C	C/T	-	-1	-	HGNC	HGNC:28971	-	-	-	-	-	-	-	-
oar3_OAR19_51596493	0.000466956	A	G	0.2385	A	G	0.3514	0.1129	19	51682761	MODIFIER	-	-	-	-	-	-	-	-	-	-	-	-	-	-	rs427621571	A	A/G	-	-	-	-	-	-	-	-	-	-	-	-	-
oar3_OAR5_27750667	0.000475863	A	G	0.4354	A	G	0.2867	0.1487	5	27979797	MODIFIER	-	-	-	-	-	-	-	-	-	-	-	-	-	-	-	A	A/G	-	-	-	-	-	-	-	-	-	-	-	-	-
oar3_OAR12_43246717	0.000572551	T	C	0.2893	T	C	0.4615	0.1722	12	44487753	MODIFIER	-	ENSOARG00020019920	Transcript	ENSOART00020030630.2	protein_coding	-	-	-	-	-	-	-	-	-	rs413864113	T	T/C	1050	-1	-	-	-	-	-	-	-	-	-	-	-
s71388.1	0.000576214	A	G	0.2697	A	G	0.4301	0.1604	12	38161904	MODIFIER	FMO4	ENSOARG00020010920	Transcript	ENSOART00020016655.2	protein_coding	-	4/8	-	-	-	-	-	-	-	-	A	A/G	-	1	-	HGNC	HGNC:3772	-	-	-	-	-	-	-	-
oar3_OAR2_104316822	0.000630823	C	A	0.236	C	A	0.1573	0.0787	2	105475077	MODIFIER	GATA4	ENSOARG00020007935	Transcript	ENSOART00020059752.1	protein_coding	-	1/2	-	-	-	-	-	-	-	-	C	C/A	-	1	-	HGNC	HGNC:4173	-	-	-	-	-	-	-	-
OAR24_23777790.1	0.000659181	A	G	0.2612	A	G	0.1538	0.1074	24	22560626	MODIFIER	CACNG3	ENSOARG00020025153	Transcript	ENSOART00020039451.2	protein_coding	-	2/2	-	-	-	-	-	-	-	rs404124121	A	A/G	-	1	-	Uniprot_gn	-	-	-	-	-	-	-	-	-
OAR24_23777790.1	0.000659181	A	G	0.2612	A	G	0.1538	0.1074	24	22560626	MODIFIER	CACNG3	ENSOARG00020025153	Transcript	ENSOART00020072162.1	protein_coding	-	3/3	-	-	-	-	-	-	-	rs404124121	A	A/G	-	1	-	Uniprot_gn	-	-	-	-	-	-	-	-	-
OAR24_23777790.1	0.000659181	A	G	0.2612	A	G	0.1538	0.1074	24	22560626	MODIFIER	CACNG3	ENSOARG00020025153	Transcript	ENSOART00020074029.1	protein_coding	-	3/3	-	-	-	-	-	-	-	rs404124121	A	A/G	-	1	-	Uniprot_gn	-	-	-	-	-	-	-	-	-
s68524.1	0.000688293	T	C	0.2388	T	C	0.3357	0.0969	8	12993278	MODIFIER	-	-	-	-	-	-	-	-	-	-	-	-	-	-	rs421054025	T	T/C	-	-	-	-	-	-	-	-	-	-	-	-	-
oar3_OAR19_51599549	0.000691204	C	A	0.3652	C	A	0.5	0.1348	19	51685865	MODIFIER	-	-	-	-	-	-	-	-	-	-	-	-	-	-	rs417297609	C	C/A	-	-	-	-	-	-	-	-	-	-	-	-	-
s25921.1	0.000691204	A	G	0.3652	A	G	0.5	0.1348	19	51689475	MODIFIER	-	-	-	-	-	-	-	-	-	-	-	-	-	-	rs410430179	A	A/G	-	-	-	-	-	-	-	-	-	-	-	-	-
s49084.1	0.000732734	C	A	0.3034	C	A	0.4266	0.1232	3	36419062	MODIFIER	ALK	ENSOARG00020005205	Transcript	ENSOART00020008124.2	protein_coding	-	3/28	-	-	-	-	-	-	-	rs416288587	C	C/A	-	-1	-	HGNC	HGNC:427	-	-	-	-	-	-	-	-
oar3_OAR14_34757329	0.00078281	T	C	0.3034	T	C	0.1853	0.1181	14	34980893	MODIFIER	-	ENSOARG00020004357	Transcript	ENSOART00020006704.2	pseudogene	-	-	-	-	-	-	-	-	-	-	T	T/C	2827	-1	-	-	-	-	-	-	-	-	-	-	-
oar3_OAR14_34757329	0.00078281	T	C	0.3034	T	C	0.1853	0.1181	14	34980893	MODIFIER	LCAT	ENSOARG00020004421	Transcript	ENSOART00020006764.2	protein_coding	-	-	-	-	-	-	-	-	-	-	T	T/C	3545	-1	-	EntrezGene	-	-	-	-	-	-	-	-	-
oar3_OAR14_34757329	0.00078281	T	C	0.3034	T	C	0.1853	0.1181	14	34980893	MODIFIER	PSKH1	ENSOARG00020004339	Transcript	ENSOART00020006632.2	protein_coding	-	-	-	-	-	-	-	-	-	-	T	T/C	4954	1	-	Uniprot_gn	-	-	-	-	-	-	-	-	-
oar3_OAR14_34757329	0.00078281	T	C	0.3034	T	C	0.1853	0.1181	14	34980893	MODIFIER	PSMB10	ENSOARG00020004407	Transcript	ENSOART00020006731.2	protein_coding	-	6/7	-	-	-	-	-	-	-	-	T	T/C	-	-1	-	Uniprot_gn	-	-	-	-	-	-	-	-	-
oar3_OAR14_34757329	0.00078281	T	C	0.3034	T	C	0.1853	0.1181	14	34980893	MODIFIER	PSMB10	ENSOARG00020004407	Transcript	ENSOART00020064363.1	protein_coding	-	6/7	-	-	-	-	-	-	-	-	T	T/C	-	-1	-	Uniprot_gn	-	-	-	-	-	-	-	-	-
oar3_OAR14_34757329	0.00078281	T	C	0.3034	T	C	0.1853	0.1181	14	34980893	MODIFIER	PSMB10	ENSOARG00020004407	Transcript	ENSOART00020064743.1	protein_coding	-	6/7	-	-	-	-	-	-	-	-	T	T/C	-	-1	-	Uniprot_gn	-	-	-	-	-	-	-	-	-
OAR5_98658014.1	0.000817347	T	G	0.486	G	T	0.3881	0.1259	5	90727325	MODIFIER	FAM172A	ENSOARG00020007055	Transcript	ENSOART00020010917.2	protein_coding	12/12	-	-	-	2161	-	-	-	-	-	T	T/G	-	-1	-	HGNC	HGNC:25365	-	-	-	-	-	-	-	-
OAR5_98658014.1	0.000817347	T	G	0.486	G	T	0.3881	0.1259	5	90727325	MODIFIER	FAM172A	ENSOARG00020007055	Transcript	ENSOART00020010954.2	protein_coding	-	-	-	-	-	-	-	-	-	-	T	T/G	2317	-1	-	HGNC	HGNC:25365	-	-	-	-	-	-	-	-
OAR5_98658014.1	0.000817347	T	G	0.486	G	T	0.3881	0.1259	5	90727325	MODIFIER	FAM172A	ENSOARG00020007055	Transcript	ENSOART00020056923.1	protein_coding	-	-	-	-	-	-	-	-	-	-	T	T/G	1668	-1	-	HGNC	HGNC:25365	-	-	-	-	-	-	-	-
OAR5_98658014.1	0.000817347	T	G	0.486	G	T	0.3881	0.1259	5	90727325	MODIFIER	FAM172A	ENSOARG00020007055	Transcript	ENSOART00020077994.1	protein_coding	-	-	-	-	-	-	-	-	-	-	T	T/G	2317	-1	-	HGNC	HGNC:25365	-	-	-	-	-	-	-	-
s40195.1	0.000852811	A	G	0.2331	A	G	0.1259	0.1072	19	47360927	MODIFIER	CACNA1D	ENSOARG00020021987	Transcript	ENSOART00020036432.2	protein_coding	-	9/47	-	-	-	-	-	-	-	-	A	A/G	-	-1	-	HGNC	HGNC:1391	-	-	-	-	-	-	-	-
s40195.1	0.000852811	A	G	0.2331	A	G	0.1259	0.1072	19	47360927	MODIFIER	CACNA1D	ENSOARG00020021987	Transcript	ENSOART00020036890.2	protein_coding	-	9/45	-	-	-	-	-	-	-	-	A	A/G	-	-1	-	HGNC	HGNC:1391	-	-	-	-	-	-	-	-
s40195.1	0.000852811	A	G	0.2331	A	G	0.1259	0.1072	19	47360927	MODIFIER	CACNA1D	ENSOARG00020021987	Transcript	ENSOART00020036951.2	protein_coding	-	9/40	-	-	-	-	-	-	-	-	A	A/G	-	-1	-	HGNC	HGNC:1391	-	-	-	-	-	-	-	-
s21485.1	0.000957594	G	A	0.4607	A	G	0.4014	0.1379	3	33609223	LOW	DRC1	ENSOARG00020000494	Transcript	ENSOART00020000756.2	protein_coding	10/17	-	-	-	1421	1350	450	Q	caG/caA	-	G	G/A	-	1	-	HGNC	HGNC:24245	-	-	-	-	-	-	-	-
OAR3_34209284.1	0.000969324	G	A	0.264	G	A	0.1888	0.0752	3	32001762	MODIFIER	-	-	-	-	-	-	-	-	-	-	-	-	-	-	-	G	G/A	-	-	-	-	-	-	-	-	-	-	-	-	-
OAR11_38029087.1	0.000978518	T	C	0.2331	T	C	0.3741	0.141	11	35773154	MODIFIER	ABCC3	ENSOARG00020026144	Transcript	ENSOART00020041123.2	protein_coding	-	-	-	-	-	-	-	-	-	-	T	T/C	4295	-1	-	HGNC	HGNC:54	-	-	-	-	-	-	-	-
OAR11_38029087.1	0.000978518	T	C	0.2331	T	C	0.3741	0.141	11	35773154	MODIFIER	ABCC3	ENSOARG00020026144	Transcript	ENSOART00020053713.1	protein_coding	-	-	-	-	-	-	-	-	-	-	T	T/C	4200	-1	-	HGNC	HGNC:54	-	-	-	-	-	-	-	-
OAR11_38029087.1	0.000978518	T	C	0.2331	T	C	0.3741	0.141	11	35773154	MODIFIER	ANKRD40	ENSOARG00020026149	Transcript	ENSOART00020041129.2	protein_coding	-	4/4	-	-	-	-	-	-	-	-	T	T/C	-	1	-	HGNC	HGNC:28233	-	-	-	-	-	-	-	-
oar3_OAR25_4267287	0.00104741	A	C	0.2345	A	C	0.1364	0.0981	25	3636889	MODIFIER	-	-	-	-	-	-	-	-	-	-	-	-	-	-	-	A	A/C	-	-	-	-	-	-	-	-	-	-	-	-	-
oar3_OAR3_56356297	0.00105375	T	G	0.3649	T	G	0.4894	0.1245	3	56508769	MODIFIER	DNAH6	ENSOARG00020002647	Transcript	ENSOART00020004188.2	protein_coding	-	37/76	-	-	-	-	-	-	-	-	T	T/G	-	1	-	HGNC	HGNC:2951	-	-	-	-	-	-	-	-
oar3_OAR3_56356297	0.00105375	T	G	0.3649	T	G	0.4894	0.1245	3	56508769	MODIFIER	DNAH6	ENSOARG00020002647	Transcript	ENSOART00020060152.1	protein_coding	-	31/70	-	-	-	-	-	-	-	-	T	T/G	-	1	-	HGNC	HGNC:2951	-	-	-	-	-	-	-	-
OAR11_35919989.1	0.0010761	G	A	0.3006	G	A	0.4056	0.105	11	33809044	MODIFIER	-	-	-	-	-	-	-	-	-	-	-	-	-	-	-	G	G/A	-	-	-	-	-	-	-	-	-	-	-	-	-
OAR16_34411628.1	0.00107746	T	C	0.264	T	C	0.3531	0.0891	16	31930157	MODIFIER	-	ENSOARG00020040634	Transcript	ENSOART00020053753.1	lncRNA	-	-	-	-	-	-	-	-	-	-	T	T/C	2301	1	-	-	-	-	-	-	-	-	-	-	-
OAR16_34411628.1	0.00107746	T	C	0.264	T	C	0.3531	0.0891	16	31930157	MODIFIER	-	ENSOARG00020040634	Transcript	ENSOART00020056723.1	lncRNA	-	1/3	-	-	-	-	-	-	-	-	T	T/C	-	1	-	-	-	-	-	-	-	-	-	-	-
OAR2_51418830.1	0.00108413	C	T	0.323	C	T	0.1993	0.1237	2	48212497	MODIFIER	-	-	-	-	-	-	-	-	-	-	-	-	-	-	-	C	C/T	-	-	-	-	-	-	-	-	-	-	-	-	-
oar3_OAR16_16501997	0.00108966	C	T	0.3483	C	T	0.2552	0.0931	16	16624080	MODIFIER	-	-	-	-	-	-	-	-	-	-	-	-	-	-	-	C	C/T	-	-	-	-	-	-	-	-	-	-	-	-	-
s23866.1	0.00109548	A	G	0.4354	G	A	0.4441	0.1205	15	26050832	MODIFIER	-	-	-	-	-	-	-	-	-	-	-	-	-	-	-	A	A/G	-	-	-	-	-	-	-	-	-	-	-	-	-
OAR3_209916841.1	0.00120048	A	G	0.4073	G	A	0.4685	0.1242	3	195752528	MODIFIER	-	ENSOARG00020038726	Transcript	ENSOART00020069390.1	protein_coding	-	1/1	-	-	-	-	-	-	-	rs421277037	A	A/G	-	-1	-	-	-	-	-	-	-	-	-	-	-
oar3_OAR20_22190305	0.00122346	A	G	0.427	A	G	0.3007	0.1263	20	22080187	MODIFIER	CRISP2	ENSOARG00020015128	Transcript	ENSOART00020023389.2	protein_coding	-	8/8	-	-	-	-	-	-	-	rs419322126	A	A/G	-	-1	-	EntrezGene	-	-	-	-	-	-	-	-	-
oar3_OAR6_31698677	0.00125615	A	G	0.2472	A	G	0.1154	0.1318	6	32357358	MODIFIER	GRID2	ENSOARG00020021077	Transcript	ENSOART00020033391.2	protein_coding	-	2/15	-	-	-	-	-	-	-	rs416678521	A	A/G	-	-1	-	HGNC	HGNC:4576	-	-	-	-	-	-	-	-
oar3_OAR6_31698677	0.00125615	A	G	0.2472	A	G	0.1154	0.1318	6	32357358	MODIFIER	GRID2	ENSOARG00020021077	Transcript	ENSOART00020033656.2	protein_coding	-	2/15	-	-	-	-	-	-	-	rs416678521	A	A/G	-	-1	-	HGNC	HGNC:4576	-	-	-	-	-	-	-	-
oar3_OAR6_31698677	0.00125615	A	G	0.2472	A	G	0.1154	0.1318	6	32357358	MODIFIER	GRID2	ENSOARG00020021077	Transcript	ENSOART00020033681.2	protein_coding	-	2/14	-	-	-	-	-	-	-	rs416678521	A	A/G	-	-1	-	HGNC	HGNC:4576	-	-	-	-	-	-	-	-
Chr20:46935311	0.00127376	A	C	0.2978	A	C	0.3986	0.1008	20	47140604	MODERATE	CAGE1	ENSOARG00020024950	Transcript	ENSOART00020039102.2	protein_coding	3/11	-	-	-	1524	1325	442	N/T	aAt/aCt	rs162206456	A	A/C	-	1	-	HGNC	HGNC:21622	-	-	-	-	deleterious(0.02)	-	-	-
oar3_OAR10_56447584	0.00127422	C	T	0.4109	C	T	0.2837	0.1272	10	56570930	MODIFIER	-	-	-	-	-	-	-	-	-	-	-	-	-	-	rs405616144	C	C/T	-	-	-	-	-	-	-	-	-	-	-	-	-
oar3_OAR3_173423290	0.00128688	G	A	0.2275	G	A	0.1084	0.1191	3	173956590	MODIFIER	SLC41A2	ENSOARG00020013952	Transcript	ENSOART00020021277.2	protein_coding	-	11/11	-	-	-	-	-	-	-	-	G	G/A	-	-1	-	Uniprot_gn	-	-	-	-	-	-	-	-	-
OAR2_61665567.1	0.00131856	A	G	0.3287	A	G	0.4371	0.1084	2	57855942	MODIFIER	-	-	-	-	-	-	-	-	-	-	-	-	-	-	-	A	A/G	-	-	-	-	-	-	-	-	-	-	-	-	-
oar3_OAR8_24393721	0.00134109	C	T	0.1272	C	T	0.06522	0.06198	8	24590817	MODIFIER	-	-	-	-	-	-	-	-	-	-	-	-	-	-	-	C	C/T	-	-	-	-	-	-	-	-	-	-	-	-	-
OAR1_193400520.1	0.00134986	C	A	0.2528	C	A	0.1364	0.1164	1	181850473	MODIFIER	LSAMP	ENSOARG00020001493	Transcript	ENSOART00020002344.2	protein_coding	-	1/8	-	-	-	-	-	-	-	-	C	C/A	-	-1	-	HGNC	HGNC:6705	-	-	-	-	-	-	-	-
OAR1_193400520.1	0.00134986	C	A	0.2528	C	A	0.1364	0.1164	1	181850473	MODIFIER	LSAMP	ENSOARG00020001493	Transcript	ENSOART00020002360.2	protein_coding	-	3/8	-	-	-	-	-	-	-	-	C	C/A	-	-1	-	HGNC	HGNC:6705	-	-	-	-	-	-	-	-
OAR1_193400520.1	0.00134986	C	A	0.2528	C	A	0.1364	0.1164	1	181850473	MODIFIER	LSAMP	ENSOARG00020001493	Transcript	ENSOART00020002395.2	protein_coding	-	1/7	-	-	-	-	-	-	-	-	C	C/A	-	-1	-	HGNC	HGNC:6705	-	-	-	-	-	-	-	-
OAR1_193400520.1	0.00134986	C	A	0.2528	C	A	0.1364	0.1164	1	181850473	MODIFIER	LSAMP	ENSOARG00020001493	Transcript	ENSOART00020002412.2	protein_coding	-	3/8	-	-	-	-	-	-	-	-	C	C/A	-	-1	-	HGNC	HGNC:6705	-	-	-	-	-	-	-	-
s07119.1	0.00136465	G	A	0.3757	G	A	0.4895	0.1138	3	35386194	MODIFIER	-	-	-	-	-	-	-	-	-	-	-	-	-	-	rs413287737	G	G/A	-	-	-	-	-	-	-	-	-	-	-	-	-
oar3_OAR11_33132012	0.00145904	C	T	0.486	T	C	0.3986	0.1154	11	33340875	MODIFIER	SPECC1	ENSOARG00020033127	Transcript	ENSOART00020041606.2	protein_coding	-	5/12	-	-	-	-	-	-	-	rs413274629	C	C/T	-	-1	-	HGNC	HGNC:30615	-	-	-	-	-	-	-	-
oar3_OAR11_33132012	0.00145904	C	T	0.486	T	C	0.3986	0.1154	11	33340875	MODIFIER	SPECC1	ENSOARG00020033127	Transcript	ENSOART00020041684.1	protein_coding	-	7/7	-	-	-	-	-	-	-	rs413274629	C	C/T	-	-1	-	HGNC	HGNC:30615	-	-	-	-	-	-	-	-
oar3_OAR11_33132012	0.00145904	C	T	0.486	T	C	0.3986	0.1154	11	33340875	MODIFIER	SPECC1	ENSOARG00020033127	Transcript	ENSOART00020048206.1	protein_coding	-	5/12	-	-	-	-	-	-	-	rs413274629	C	C/T	-	-1	-	HGNC	HGNC:30615	-	-	-	-	-	-	-	-
oar3_OAR11_33132012	0.00145904	C	T	0.486	T	C	0.3986	0.1154	11	33340875	MODIFIER	SPECC1	ENSOARG00020033127	Transcript	ENSOART00020052932.1	protein_coding	-	5/12	-	-	-	-	-	-	-	rs413274629	C	C/T	-	-1	-	HGNC	HGNC:30615	-	-	-	-	-	-	-	-
oar3_OAR11_33132012	0.00145904	C	T	0.486	T	C	0.3986	0.1154	11	33340875	MODIFIER	SPECC1	ENSOARG00020033127	Transcript	ENSOART00020071644.1	protein_coding	-	7/13	-	-	-	-	-	-	-	rs413274629	C	C/T	-	-1	-	HGNC	HGNC:30615	-	-	-	-	-	-	-	-
oar3_OAR11_33132012	0.00145904	C	T	0.486	T	C	0.3986	0.1154	11	33340875	MODIFIER	SPECC1	ENSOARG00020033127	Transcript	ENSOART00020077865.1	protein_coding	-	7/14	-	-	-	-	-	-	-	rs413274629	C	C/T	-	-1	-	HGNC	HGNC:30615	-	-	-	-	-	-	-	-
oar3_OAR11_33132012	0.00145904	C	T	0.486	T	C	0.3986	0.1154	11	33340875	MODIFIER	SPECC1	ENSOARG00020033127	Transcript	ENSOART00020081901.1	protein_coding	-	7/14	-	-	-	-	-	-	-	rs413274629	C	C/T	-	-1	-	HGNC	HGNC:30615	-	-	-	-	-	-	-	-
oar3_OAR5_50951455	0.00152353	T	C	0.3567	T	C	0.2552	0.1015	5	51221262	MODIFIER	-	-	-	-	-	-	-	-	-	-	-	-	-	-	rs409646139	T	T/C	-	-	-	-	-	-	-	-	-	-	-	-	-
OAR6_99289370.1	0.00153381	A	G	0.4633	G	A	0.4196	0.1171	6	91621083	MODIFIER	-	ENSOARG00020040993	Transcript	ENSOART00020046358.1	protein_coding	-	-	-	-	-	-	-	-	-	-	A	A/G	2257	-1	-	-	-	-	-	-	-	-	-	-	-
OAR6_99289370.1	0.00153381	A	G	0.4633	G	A	0.4196	0.1171	6	91621083	MODIFIER	-	ENSOARG00020040993	Transcript	ENSOART00020053603.1	protein_coding	-	1/3	-	-	-	-	-	-	-	-	A	A/G	-	-1	-	-	-	-	-	-	-	-	-	-	-
OAR6_99289370.1	0.00153381	A	G	0.4633	G	A	0.4196	0.1171	6	91621083	MODIFIER	-	ENSOARG00020040993	Transcript	ENSOART00020073532.1	protein_coding	-	-	-	-	-	-	-	-	-	-	A	A/G	2257	-1	-	-	-	-	-	-	-	-	-	-	-
oar3_OAR18_64792120	0.00153831	C	T	0.441	C	T	0.2937	0.1473	18	63729706	MODIFIER	-	-	-	-	-	-	-	-	-	-	-	-	-	-	rs413765364	C	C/T	-	-	-	-	-	-	-	-	-	-	-	-	-
OAR17_54459942.1	0.00155035	G	A	0.1713	G	A	0.09091	0.08039	17	50435527	MODIFIER	-	ENSOARG00020037342	Transcript	ENSOART00020042520.1	protein_coding	-	1/2	-	-	-	-	-	-	-	-	G	G/A	-	-1	-	-	-	-	-	-	-	-	-	-	-
OAR17_54459942.1	0.00155035	G	A	0.1713	G	A	0.09091	0.08039	17	50435527	MODIFIER	-	ENSOARG00020037342	Transcript	ENSOART00020049318.1	protein_coding	-	1/1	-	-	-	-	-	-	-	-	G	G/A	-	-1	-	-	-	-	-	-	-	-	-	-	-
s22463.1	0.00156063	C	T	0.4242	T	C	0.4406	0.1352	1	102633807	MODIFIER	-	-	-	-	-	-	-	-	-	-	-	-	-	-	-	C	C/T	-	-	-	-	-	-	-	-	-	-	-	-	-
s51485.1	0.00165735	C	T	0.4101	C	T	0.2899	0.1202	6	108522941	MODIFIER	-	-	-	-	-	-	-	-	-	-	-	-	-	-	-	C	C/T	-	-	-	-	-	-	-	-	-	-	-	-	-
oar3_OAR6_91506061	0.00168647	G	A	0.06463	G	A	0.12	0.05537	6	92585726	MODIFIER	SEPTIN11	ENSOARG00020006144	Transcript	ENSOART00020009627.2	protein_coding	-	4/10	-	-	-	-	-	-	-	-	G	G/A	-	1	-	HGNC	HGNC:25589	-	-	-	-	-	-	-	-
oar3_OAR6_91506061	0.00168647	G	A	0.06463	G	A	0.12	0.05537	6	92585726	MODIFIER	SEPTIN11	ENSOARG00020006144	Transcript	ENSOART00020009663.2	protein_coding	-	5/11	-	-	-	-	-	-	-	-	G	G/A	-	1	-	HGNC	HGNC:25589	-	-	-	-	-	-	-	-
oar3_OAR6_91506061	0.00168647	G	A	0.06463	G	A	0.12	0.05537	6	92585726	MODIFIER	SEPTIN11	ENSOARG00020006144	Transcript	ENSOART00020049138.1	protein_coding	-	4/9	-	-	-	-	-	-	-	-	G	G/A	-	1	-	HGNC	HGNC:25589	-	-	-	-	-	-	-	-
oar3_OAR6_91506061	0.00168647	G	A	0.06463	G	A	0.12	0.05537	6	92585726	MODIFIER	SEPTIN11	ENSOARG00020006144	Transcript	ENSOART00020057092.1	protein_coding	-	4/10	-	-	-	-	-	-	-	-	G	G/A	-	1	-	HGNC	HGNC:25589	-	-	-	-	-	-	-	-
oar3_OAR6_91506061	0.00168647	G	A	0.06463	G	A	0.12	0.05537	6	92585726	MODIFIER	SEPTIN11	ENSOARG00020006144	Transcript	ENSOART00020071895.1	protein_coding	-	4/9	-	-	-	-	-	-	-	-	G	G/A	-	1	-	HGNC	HGNC:25589	-	-	-	-	-	-	-	-
oar3_OAR6_91506061	0.00168647	G	A	0.06463	G	A	0.12	0.05537	6	92585726	MODIFIER	SEPTIN11	ENSOARG00020006144	Transcript	ENSOART00020078816.1	protein_coding	-	4/9	-	-	-	-	-	-	-	-	G	G/A	-	1	-	HGNC	HGNC:25589	-	-	-	-	-	-	-	-
oar3_OAR21_20572772	0.00170952	T	C	0.2949	T	C	0.1888	0.1061	21	18760644	MODIFIER	-	-	-	-	-	-	-	-	-	-	-	-	-	-	-	T	T/C	-	-	-	-	-	-	-	-	-	-	-	-	-
oar3_OAR24_13821890	0.00174411	A	G	0.4494	G	A	0.4056	0.145	24	14349302	MODIFIER	-	-	-	-	-	-	-	-	-	-	-	-	-	-	-	A	A/G	-	-	-	-	-	-	-	-	-	-	-	-	-
oar3_OAR3_31911700	0.00175226	G	A	0.309	G	A	0.2203	0.0887	3	32048125	MODIFIER	-	-	-	-	-	-	-	-	-	-	-	-	-	-	-	G	G/A	-	-	-	-	-	-	-	-	-	-	-	-	-
OAR5_34766831.1	0.00185993	A	G	0.486	G	A	0.3776	0.1364	5	31591061	MODIFIER	-	ENSOARG00020031825	Transcript	ENSOART00020043455.1	lncRNA	-	-	-	-	-	-	-	-	-	-	A	A/G	34	1	-	-	-	-	-	-	-	-	-	-	-
OAR5_34766831.1	0.00185993	A	G	0.486	G	A	0.3776	0.1364	5	31591061	MODIFIER	-	ENSOARG00020031825	Transcript	ENSOART00020055530.1	lncRNA	-	-	-	-	-	-	-	-	-	-	A	A/G	34	1	-	-	-	-	-	-	-	-	-	-	-
OAR5_34766831.1	0.00185993	A	G	0.486	G	A	0.3776	0.1364	5	31591061	MODIFIER	-	ENSOARG00020027327	Transcript	ENSOART00020056561.1	lncRNA	-	1/3	-	-	-	-	-	-	-	-	A	A/G	-	-1	-	-	-	-	-	-	-	-	-	-	-
s44980.1	0.00188739	T	G	0.4747	G	T	0.3986	0.1267	9	16906324	MODIFIER	-	-	-	-	-	-	-	-	-	-	-	-	-	-	rs413667978	T	T/G	-	-	-	-	-	-	-	-	-	-	-	-	-
oar3_OAR16_10203069	0.00196746	G	A	0.3371	G	A	0.486	0.1489	16	10336047	MODIFIER	-	ENSOARG00020023910	Transcript	ENSOART00020037293.2	protein_coding	2/17	-	-	-	133	-	-	-	-	rs162149083	G	G/A	-	-1	-	-	-	-	-	-	-	-	-	-	-
oar3_OAR3_35688103	0.00200567	T	C	0.2556	T	C	0.3601	0.1045	3	35810029	MODIFIER	SNORD92	ENSOARG00020029997	Transcript	ENSOART00020080510.1	snoRNA	-	-	-	-	-	-	-	-	-	-	T	T/C	2048	1	-	HGNC	HGNC:32754	-	-	-	-	-	-	-	-
oar3_OAR3_35688103	0.00200567	T	C	0.2556	T	C	0.3601	0.1045	3	35810029	MODIFIER	WDR43	ENSOARG00020004922	Transcript	ENSOART00020007594.2	protein_coding	-	6/17	-	-	-	-	-	-	-	-	T	T/C	-	1	-	HGNC	HGNC:28945	-	-	-	-	-	-	-	-
oar3_OAR1_174863120	0.00203461	G	A	0.3764	G	A	0.2692	0.1072	1	177440995	MODIFIER	-	ENSOARG00020034684	Transcript	ENSOART00020008674.2	lncRNA	2/2	-	-	-	1050	-	-	-	-	rs430565837	G	G/A	-	1	-	-	-	-	-	-	-	-	-	-	-
oar3_OAR1_174863120	0.00203461	G	A	0.3764	G	A	0.2692	0.1072	1	177440995	MODIFIER	-	ENSOARG00020034684	Transcript	ENSOART00020068233.1	lncRNA	-	1/1	-	-	-	-	-	-	-	rs430565837	G	G/A	-	1	-	-	-	-	-	-	-	-	-	-	-
s09023.1	0.00216071	T	C	0.1236	T	C	0.2273	0.1037	1	86537496	MODIFIER	CELSR2	ENSOARG00020005697	Transcript	ENSOART00020008898.2	protein_coding	-	1/33	-	-	-	-	-	-	-	rs417024124	T	T/C	-	1	-	HGNC	HGNC:3231	-	-	-	-	-	-	-	-
s09023.1	0.00216071	T	C	0.1236	T	C	0.2273	0.1037	1	86537496	MODIFIER	CELSR2	ENSOARG00020005697	Transcript	ENSOART00020062887.1	protein_coding	-	1/33	-	-	-	-	-	-	-	rs417024124	T	T/C	-	1	-	HGNC	HGNC:3231	-	-	-	-	-	-	-	-
s09023.1	0.00216071	T	C	0.1236	T	C	0.2273	0.1037	1	86537496	MODIFIER	CELSR2	ENSOARG00020005697	Transcript	ENSOART00020068843.1	protein_coding	-	3/34	-	-	-	-	-	-	-	rs417024124	T	T/C	-	1	-	HGNC	HGNC:3231	-	-	-	-	-	-	-	-
OAR6_35541087.1	0.00219237	C	T	0.4253	C	T	0.2762	0.1491	6	32165204	MODIFIER	GRID2	ENSOARG00020021077	Transcript	ENSOART00020033391.2	protein_coding	-	4/15	-	-	-	-	-	-	-	-	C	C/T	-	-1	-	HGNC	HGNC:4576	-	-	-	-	-	-	-	-
OAR6_35541087.1	0.00219237	C	T	0.4253	C	T	0.2762	0.1491	6	32165204	MODIFIER	GRID2	ENSOARG00020021077	Transcript	ENSOART00020033656.2	protein_coding	-	4/15	-	-	-	-	-	-	-	-	C	C/T	-	-1	-	HGNC	HGNC:4576	-	-	-	-	-	-	-	-
OAR6_35541087.1	0.00219237	C	T	0.4253	C	T	0.2762	0.1491	6	32165204	MODIFIER	GRID2	ENSOARG00020021077	Transcript	ENSOART00020033681.2	protein_coding	-	3/14	-	-	-	-	-	-	-	-	C	C/T	-	-1	-	HGNC	HGNC:4576	-	-	-	-	-	-	-	-
OAR6_35541087.1	0.00219237	C	T	0.4253	C	T	0.2762	0.1491	6	32165204	MODIFIER	GRID2	ENSOARG00020021077	Transcript	ENSOART00020033731.2	protein_coding	-	3/3	-	-	-	-	-	-	-	-	C	C/T	-	-1	-	HGNC	HGNC:4576	-	-	-	-	-	-	-	-
OAR5_50714795.1	0.00220223	C	T	0.4635	T	C	0.4161	0.1204	5	46865131	MODIFIER	-	-	-	-	-	-	-	-	-	-	-	-	-	-	rs411852687	C	C/T	-	-	-	-	-	-	-	-	-	-	-	-	-
OAR20_23258439.1	0.00224953	T	G	0.3571	T	G	0.4854	0.1283	20	21833932	MODIFIER	-	-	-	-	-	-	-	-	-	-	-	-	-	-	-	T	T/G	-	-	-	-	-	-	-	-	-	-	-	-	-
OAR3_35053594.1	0.0022703	T	G	0.3708	T	G	0.2238	0.147	3	32848021	MODIFIER	DTNB	ENSOARG00020022321	Transcript	ENSOART00020034728.2	protein_coding	-	12/19	-	-	-	-	-	-	-	rs398238314	T	T/G	-	-1	-	HGNC	HGNC:3058	-	-	-	-	-	-	-	-
OAR3_35053594.1	0.0022703	T	G	0.3708	T	G	0.2238	0.147	3	32848021	MODIFIER	DTNB	ENSOARG00020022321	Transcript	ENSOART00020034758.2	protein_coding	-	12/18	-	-	-	-	-	-	-	rs398238314	T	T/G	-	-1	-	HGNC	HGNC:3058	-	-	-	-	-	-	-	-
OAR3_35053594.1	0.0022703	T	G	0.3708	T	G	0.2238	0.147	3	32848021	MODIFIER	DTNB	ENSOARG00020022321	Transcript	ENSOART00020034795.2	protein_coding	-	12/19	-	-	-	-	-	-	-	rs398238314	T	T/G	-	-1	-	HGNC	HGNC:3058	-	-	-	-	-	-	-	-
OAR3_35053594.1	0.0022703	T	G	0.3708	T	G	0.2238	0.147	3	32848021	MODIFIER	DTNB	ENSOARG00020022321	Transcript	ENSOART00020034841.2	protein_coding	-	12/17	-	-	-	-	-	-	-	rs398238314	T	T/G	-	-1	-	HGNC	HGNC:3058	-	-	-	-	-	-	-	-
OAR3_35053594.1	0.0022703	T	G	0.3708	T	G	0.2238	0.147	3	32848021	MODIFIER	DTNB	ENSOARG00020022321	Transcript	ENSOART00020034868.2	protein_coding	-	11/16	-	-	-	-	-	-	-	rs398238314	T	T/G	-	-1	-	HGNC	HGNC:3058	-	-	-	-	-	-	-	-
OAR3_35053594.1	0.0022703	T	G	0.3708	T	G	0.2238	0.147	3	32848021	MODIFIER	DTNB	ENSOARG00020022321	Transcript	ENSOART00020075395.1	protein_coding	-	12/15	-	-	-	-	-	-	-	rs398238314	T	T/G	-	-1	-	HGNC	HGNC:3058	-	-	-	-	-	-	-	-
OAR3_35053594.1	0.0022703	T	G	0.3708	T	G	0.2238	0.147	3	32848021	MODIFIER	DTNB	ENSOARG00020022321	Transcript	ENSOART00020078137.1	protein_coding	-	12/17	-	-	-	-	-	-	-	rs398238314	T	T/G	-	-1	-	HGNC	HGNC:3058	-	-	-	-	-	-	-	-
oar3_OAR15_27838342	0.00228839	G	A	0.4101	A	G	0.486	0.1039	15	28078719	MODIFIER	DSCAML1	ENSOARG00020006009	Transcript	ENSOART00020009972.2	protein_coding	-	3/32	-	-	-	-	-	-	-	-	G	G/A	-	-1	-	HGNC	HGNC:14656	-	-	-	-	-	-	-	-
oar3_OAR15_27838342	0.00228839	G	A	0.4101	A	G	0.486	0.1039	15	28078719	MODIFIER	DSCAML1	ENSOARG00020006009	Transcript	ENSOART00020010125.2	protein_coding	-	2/30	-	-	-	-	-	-	-	-	G	G/A	-	-1	-	HGNC	HGNC:14656	-	-	-	-	-	-	-	-
OAR19_38627551.1	0.00229687	A	G	0.4129	G	A	0.451	0.1361	19	36923009	MODIFIER	ADAMTS9	ENSOARG00020024236	Transcript	ENSOART00020037888.2	protein_coding	-	10/39	-	-	-	-	-	-	-	-	A	A/G	-	1	-	HGNC	HGNC:13202	-	-	-	-	-	-	-	-
OAR19_38627551.1	0.00229687	A	G	0.4129	G	A	0.451	0.1361	19	36923009	MODIFIER	ADAMTS9	ENSOARG00020024236	Transcript	ENSOART00020038009.2	protein_coding	-	9/38	-	-	-	-	-	-	-	-	A	A/G	-	1	-	HGNC	HGNC:13202	-	-	-	-	-	-	-	-
OAR19_38627551.1	0.00229687	A	G	0.4129	G	A	0.451	0.1361	19	36923009	MODIFIER	ADAMTS9	ENSOARG00020024236	Transcript	ENSOART00020038036.2	protein_coding	-	10/38	-	-	-	-	-	-	-	-	A	A/G	-	1	-	HGNC	HGNC:13202	-	-	-	-	-	-	-	-
OAR3_209162669.1	0.00240543	A	G	0.3904	A	G	0.5	0.1096	3	195212877	MODIFIER	-	-	-	-	-	-	-	-	-	-	-	-	-	-	rs410915726	A	A/G	-	-	-	-	-	-	-	-	-	-	-	-	-
oar3_OAR16_41379252	0.00245564	T	C	0.3792	T	C	0.486	0.1068	16	41637515	MODIFIER	-	ENSOARG00020030773	Transcript	ENSOART00020051152.1	protein_coding	-	-	-	-	-	-	-	-	-	rs415681865	T	T/C	1159	-1	-	-	-	-	-	-	-	-	-	-	-
Chr23:2571791	0.00249768	A	G	0.3927	A	G	0.3007	0.092	23	2806713	MODIFIER	ZNF516	ENSOARG00020016047	Transcript	ENSOART00020024551.2	protein_coding	-	2/5	-	-	-	-	-	-	-	-	A	A/G	-	1	-	HGNC	HGNC:28990	-	-	-	-	-	-	-	-
Chr23:2571791	0.00249768	A	G	0.3927	A	G	0.3007	0.092	23	2806713	MODIFIER	ZNF516	ENSOARG00020016047	Transcript	ENSOART00020024585.2	protein_coding	-	1/2	-	-	-	-	-	-	-	-	A	A/G	-	1	-	HGNC	HGNC:28990	-	-	-	-	-	-	-	-
OAR19_56419475.1	0.00253471	G	A	0.3192	G	A	0.4161	0.0969	19	53471219	MODIFIER	LZTFL1	ENSOARG00020025271	Transcript	ENSOART00020039626.2	protein_coding	-	2/11	-	-	-	-	-	-	-	-	G	G/A	-	1	-	Uniprot_gn	-	-	-	-	-	-	-	-	-
OAR19_56419475.1	0.00253471	G	A	0.3192	G	A	0.4161	0.0969	19	53471219	MODIFIER	LZTFL1	ENSOARG00020025271	Transcript	ENSOART00020055233.1	protein_coding	-	1/10	-	-	-	-	-	-	-	-	G	G/A	-	1	-	Uniprot_gn	-	-	-	-	-	-	-	-	-
OAR19_56419475.1	0.00253471	G	A	0.3192	G	A	0.4161	0.0969	19	53471219	MODIFIER	LZTFL1	ENSOARG00020025271	Transcript	ENSOART00020079530.1	protein_coding	-	2/11	-	-	-	-	-	-	-	-	G	G/A	-	1	-	Uniprot_gn	-	-	-	-	-	-	-	-	-
OAR19_56419475.1	0.00253471	G	A	0.3192	G	A	0.4161	0.0969	19	53471219	MODIFIER	LZTFL1	ENSOARG00020025271	Transcript	ENSOART00020081058.1	protein_coding	-	1/3	-	-	-	-	-	-	-	-	G	G/A	-	1	-	Uniprot_gn	-	-	-	-	-	-	-	-	-
OAR7_105267200.1	0.00257452	T	G	0.3539	T	G	0.2692	0.0847	7	97813399	MODIFIER	GPR65	ENSOARG00020012711	Transcript	ENSOART00020019375.2	protein_coding	-	-	-	-	-	-	-	-	-	rs408347688	T	T/G	13	1	-	Uniprot_gn	-	-	-	-	-	-	-	-	-
OAR7_105267200.1	0.00257452	T	G	0.3539	T	G	0.2692	0.0847	7	97813399	MODIFIER	GPR65	ENSOARG00020012711	Transcript	ENSOART00020061793.1	protein_coding	-	-	-	-	-	-	-	-	-	rs408347688	T	T/G	1383	1	-	Uniprot_gn	-	-	-	-	-	-	-	-	-
Chr12:63853698	0.00257803	T	C	0.309	T	C	0.1993	0.1097	12	65189979	MODIFIER	EDEM3	ENSOARG00020005876	Transcript	ENSOART00020009251.2	protein_coding	-	12/20	-	-	-	-	-	-	-	rs416691191	T	T/C	-	-1	-	HGNC	HGNC:16787	-	-	-	-	-	-	-	-
Chr12:63853698	0.00257803	T	C	0.309	T	C	0.1993	0.1097	12	65189979	MODIFIER	EDEM3	ENSOARG00020005876	Transcript	ENSOART00020009358.2	protein_coding	-	12/20	-	-	-	-	-	-	-	rs416691191	T	T/C	-	-1	-	HGNC	HGNC:16787	-	-	-	-	-	-	-	-
Chr12:63853698	0.00257803	T	C	0.309	T	C	0.1993	0.1097	12	65189979	MODIFIER	EDEM3	ENSOARG00020005876	Transcript	ENSOART00020009483.2	protein_coding	-	14/22	-	-	-	-	-	-	-	rs416691191	T	T/C	-	-1	-	HGNC	HGNC:16787	-	-	-	-	-	-	-	-
Chr12:63853698	0.00257803	T	C	0.309	T	C	0.1993	0.1097	12	65189979	MODIFIER	EDEM3	ENSOARG00020005876	Transcript	ENSOART00020060447.1	protein_coding	-	11/18	-	-	-	-	-	-	-	rs416691191	T	T/C	-	-1	-	HGNC	HGNC:16787	-	-	-	-	-	-	-	-
Chr12:63853698	0.00257803	T	C	0.309	T	C	0.1993	0.1097	12	65189979	MODIFIER	EDEM3	ENSOARG00020005876	Transcript	ENSOART00020078655.1	protein_coding	-	12/19	-	-	-	-	-	-	-	rs416691191	T	T/C	-	-1	-	HGNC	HGNC:16787	-	-	-	-	-	-	-	-
s62723.1	0.00267582	G	A	0.2697	G	A	0.3636	0.0939	26	1069028	MODIFIER	DLGAP2	ENSOARG00020023852	Transcript	ENSOART00020037280.2	protein_coding	-	3/14	-	-	-	-	-	-	-	-	G	G/A	-	1	-	HGNC	HGNC:2906	-	-	-	-	-	-	-	-
s62723.1	0.00267582	G	A	0.2697	G	A	0.3636	0.0939	26	1069028	MODIFIER	DLGAP2	ENSOARG00020023852	Transcript	ENSOART00020037308.2	protein_coding	-	4/15	-	-	-	-	-	-	-	-	G	G/A	-	1	-	HGNC	HGNC:2906	-	-	-	-	-	-	-	-
s62723.1	0.00267582	G	A	0.2697	G	A	0.3636	0.0939	26	1069028	MODIFIER	DLGAP2	ENSOARG00020023852	Transcript	ENSOART00020037321.2	protein_coding	-	2/12	-	-	-	-	-	-	-	-	G	G/A	-	1	-	HGNC	HGNC:2906	-	-	-	-	-	-	-	-
OAR2_138672719.1	0.00270046	G	A	0.2163	G	A	0.1014	0.1149	2	131460637	MODIFIER	TTN	ENSOARG00020026501	Transcript	ENSOART00020052515.1	protein_coding	-	146/301	-	-	-	-	-	-	-	-	G	G/A	-	1	-	HGNC	HGNC:12403	-	-	-	-	-	-	-	-
OAR2_138672719.1	0.00270046	G	A	0.2163	G	A	0.1014	0.1149	2	131460637	MODIFIER	TTN	ENSOARG00020026501	Transcript	ENSOART00020056573.1	protein_coding	-	142/300	-	-	-	-	-	-	-	-	G	G/A	-	1	-	HGNC	HGNC:12403	-	-	-	-	-	-	-	-
OAR2_138672719.1	0.00270046	G	A	0.2163	G	A	0.1014	0.1149	2	131460637	MODIFIER	TTN	ENSOARG00020026501	Transcript	ENSOART00020059826.1	protein_coding	-	129/279	-	-	-	-	-	-	-	-	G	G/A	-	1	-	HGNC	HGNC:12403	-	-	-	-	-	-	-	-
OAR2_138672719.1	0.00270046	G	A	0.2163	G	A	0.1014	0.1149	2	131460637	MODIFIER	TTN	ENSOARG00020026501	Transcript	ENSOART00020069633.1	protein_coding	-	144/301	-	-	-	-	-	-	-	-	G	G/A	-	1	-	HGNC	HGNC:12403	-	-	-	-	-	-	-	-
OAR2_138672719.1	0.00270046	G	A	0.2163	G	A	0.1014	0.1149	2	131460637	MODIFIER	TTN	ENSOARG00020026501	Transcript	ENSOART00020070870.1	protein_coding	-	146/307	-	-	-	-	-	-	-	-	G	G/A	-	1	-	HGNC	HGNC:12403	-	-	-	-	-	-	-	-
OAR2_138672719.1	0.00270046	G	A	0.2163	G	A	0.1014	0.1149	2	131460637	MODIFIER	TTN	ENSOARG00020026501	Transcript	ENSOART00020073201.1	protein_coding	-	127/277	-	-	-	-	-	-	-	-	G	G/A	-	1	-	HGNC	HGNC:12403	-	-	-	-	-	-	-	-
OAR2_138672719.1	0.00270046	G	A	0.2163	G	A	0.1014	0.1149	2	131460637	LOW	TTN	ENSOARG00020026501	Transcript	ENSOART00020073895.1	protein_coding	148/317	-	-	-	31091	30792	10264	V	gtG/gtA	-	G	G/A	-	1	-	HGNC	HGNC:12403	-	-	-	-	-	-	-	-
OAR2_138672719.1	0.00270046	G	A	0.2163	G	A	0.1014	0.1149	2	131460637	MODIFIER	TTN	ENSOARG00020026501	Transcript	ENSOART00020075547.1	protein_coding	-	137/287	-	-	-	-	-	-	-	-	G	G/A	-	1	-	HGNC	HGNC:12403	-	-	-	-	-	-	-	-
OAR2_138672719.1	0.00270046	G	A	0.2163	G	A	0.1014	0.1149	2	131460637	MODIFIER	TTN	ENSOARG00020026501	Transcript	ENSOART00020076016.1	protein_coding	-	142/302	-	-	-	-	-	-	-	-	G	G/A	-	1	-	HGNC	HGNC:12403	-	-	-	-	-	-	-	-
OAR2_138672719.1	0.00270046	G	A	0.2163	G	A	0.1014	0.1149	2	131460637	LOW	TTN	ENSOARG00020026501	Transcript	ENSOART00020081960.1	protein_coding	148/311	-	-	-	31097	30792	10264	V	gtG/gtA	-	G	G/A	-	1	-	HGNC	HGNC:12403	-	-	-	-	-	-	-	-
OAR22_28842483.1	0.0027143	C	T	0.2388	C	T	0.1294	0.1094	22	25125134	MODIFIER	SORCS3	ENSOARG00020011044	Transcript	ENSOART00020017466.2	protein_coding	-	2/26	-	-	-	-	-	-	-	rs404003864	C	C/T	-	1	-	HGNC	HGNC:16699	-	-	-	-	-	-	-	-
oar3_OAR25_21946605	0.00272607	T	C	0.304	T	C	0.4007	0.0967	25	21380472	MODIFIER	-	-	-	-	-	-	-	-	-	-	-	-	-	-	rs430384810	T	T/C	-	-	-	-	-	-	-	-	-	-	-	-	-
s55029.1	0.00273601	C	T	0.427	T	C	0.472	0.101	11	34818002	MODIFIER	-	ENSOARG00020034052	Transcript	ENSOART00020043829.1	lncRNA	3/3	-	-	-	556	-	-	-	-	rs400330034	C	C/T	-	-1	-	-	-	-	-	-	-	-	-	-	-
oar3_OAR9_47861685	0.00275047	C	T	0.3174	C	T	0.4196	0.1022	9	48007380	MODIFIER	EYA1	ENSOARG00020009883	Transcript	ENSOART00020017903.2	protein_coding	-	2/18	-	-	-	-	-	-	-	-	C	C/T	-	-1	-	Uniprot_gn	-	-	-	-	-	-	-	-	-
oar3_OAR9_47861685	0.00275047	C	T	0.3174	C	T	0.4196	0.1022	9	48007380	MODIFIER	EYA1	ENSOARG00020009883	Transcript	ENSOART00020017970.2	protein_coding	-	2/17	-	-	-	-	-	-	-	-	C	C/T	-	-1	-	Uniprot_gn	-	-	-	-	-	-	-	-	-
oar3_OAR9_47861685	0.00275047	C	T	0.3174	C	T	0.4196	0.1022	9	48007380	MODIFIER	EYA1	ENSOARG00020009883	Transcript	ENSOART00020018048.2	protein_coding	-	1/17	-	-	-	-	-	-	-	-	C	C/T	-	-1	-	Uniprot_gn	-	-	-	-	-	-	-	-	-
oar3_OAR2_233811637	0.00275907	A	G	0.1545	A	G	0.06643	0.08807	2	234713962	MODIFIER	RNF19B	ENSOARG00020019029	Transcript	ENSOART00020029489.2	protein_coding	-	5/9	-	-	-	-	-	-	-	rs400883043	A	A/G	-	1	-	HGNC	HGNC:26886	-	-	-	-	-	-	-	-
OAR2_181113504.1	0.0028415	G	A	0.3567	G	A	0.4615	0.1048	2	171934063	MODIFIER	NXPH2	ENSOARG00020011226	Transcript	ENSOART00020017098.2	protein_coding	-	1/1	-	-	-	-	-	-	-	-	G	G/A	-	1	-	HGNC	HGNC:8076	-	-	-	-	-	-	-	-
OAR2_181113504.1	0.0028415	G	A	0.3567	G	A	0.4615	0.1048	2	171934063	MODIFIER	NXPH2	ENSOARG00020011226	Transcript	ENSOART00020057239.1	protein_coding	-	1/1	-	-	-	-	-	-	-	-	G	G/A	-	1	-	HGNC	HGNC:8076	-	-	-	-	-	-	-	-
Chr6:13245494	0.00287183	C	G	0.1685	C	G	0.06993	0.09857	6	13501012	MODERATE	ALPK1	ENSOARG00020022905	Transcript	ENSOART00020035574.2	protein_coding	11/13	-	-	-	3214	3024	1008	Q/H	caG/caC	-	C	C/G	-	-1	-	HGNC	HGNC:20917	-	-	-	-	-	-	-	-
Chr6:13245494	0.00287183	C	G	0.1685	C	G	0.06993	0.09857	6	13501012	MODERATE	ALPK1	ENSOARG00020022905	Transcript	ENSOART00020035587.2	protein_coding	12/14	-	-	-	3369	3258	1086	Q/H	caG/caC	-	C	C/G	-	-1	-	HGNC	HGNC:20917	-	-	-	-	-	-	-	-
Chr6:13245494	0.00287183	C	G	0.1685	C	G	0.06993	0.09857	6	13501012	MODERATE	ALPK1	ENSOARG00020022905	Transcript	ENSOART00020035603.2	protein_coding	11/14	-	-	-	3353	3024	1008	Q/H	caG/caC	-	C	C/G	-	-1	-	HGNC	HGNC:20917	-	-	-	-	-	-	-	-
oar3_OAR2_248628405	0.00292819	C	T	0.1953	C	T	0.3172	0.1219	2	249473106	MODIFIER	FBXO42	ENSOARG00020015758	Transcript	ENSOART00020024134.2	protein_coding	-	1/9	-	-	-	-	-	-	-	rs412182767	C	C/T	-	1	-	HGNC	HGNC:29249	-	-	-	-	-	-	-	-
oar3_OAR2_248628405	0.00292819	C	T	0.1953	C	T	0.3172	0.1219	2	249473106	MODIFIER	FBXO42	ENSOARG00020015758	Transcript	ENSOART00020081715.1	protein_coding	-	1/8	-	-	-	-	-	-	-	rs412182767	C	C/T	-	1	-	HGNC	HGNC:29249	-	-	-	-	-	-	-	-
OAR2_51662972.1	0.00297115	T	C	0.3989	T	C	0.2762	0.1227	2	48470105	MODIFIER	-	-	-	-	-	-	-	-	-	-	-	-	-	-	-	T	T/C	-	-	-	-	-	-	-	-	-	-	-	-	-
oar3_OAR2_168767931	0.00299109	C	T	0.3792	C	T	0.4825	0.1033	2	169925945	LOW	LRP1B	ENSOARG00020006148	Transcript	ENSOART00020016619.2	protein_coding	49/90	-	-	-	8281	8082	2694	N	aaC/aaT	rs419154927	C	C/T	-	1	-	HGNC	HGNC:6693	-	-	-	-	-	-	-	-
oar3_OAR2_168767931	0.00299109	C	T	0.3792	C	T	0.4825	0.1033	2	169925945	LOW	LRP1B	ENSOARG00020006148	Transcript	ENSOART00020042091.1	protein_coding	49/92	-	-	-	8281	8082	2694	N	aaC/aaT	rs419154927	C	C/T	-	1	-	HGNC	HGNC:6693	-	-	-	-	-	-	-	-
oar3_OAR2_168767931	0.00299109	C	T	0.3792	C	T	0.4825	0.1033	2	169925945	LOW	LRP1B	ENSOARG00020006148	Transcript	ENSOART00020045776.1	protein_coding	49/91	-	-	-	8281	8082	2694	N	aaC/aaT	rs419154927	C	C/T	-	1	-	HGNC	HGNC:6693	-	-	-	-	-	-	-	-
oar3_OAR6_41084760	0.00301407	T	C	0.2949	T	C	0.2063	0.0886	6	41799523	MODIFIER	KCNIP4	ENSOARG00020010623	Transcript	ENSOART00020018817.2	protein_coding	-	1/8	-	-	-	-	-	-	-	rs421142278	T	T/C	-	-1	-	Uniprot_gn	-	-	-	-	-	-	-	-	-
oar3_OAR6_41084760	0.00301407	T	C	0.2949	T	C	0.2063	0.0886	6	41799523	MODIFIER	KCNIP4	ENSOARG00020010623	Transcript	ENSOART00020018870.2	protein_coding	-	1/7	-	-	-	-	-	-	-	rs421142278	T	T/C	-	-1	-	Uniprot_gn	-	-	-	-	-	-	-	-	-
oar3_OAR6_41084760	0.00301407	T	C	0.2949	T	C	0.2063	0.0886	6	41799523	MODIFIER	KCNIP4	ENSOARG00020010623	Transcript	ENSOART00020018927.2	protein_coding	-	1/7	-	-	-	-	-	-	-	rs421142278	T	T/C	-	-1	-	Uniprot_gn	-	-	-	-	-	-	-	-	-
OAR11_35758049.1	0.00301997	G	A	0.3857	G	A	0.4856	0.0999	11	33692294	MODIFIER	-	ENSOARG00020026416	Transcript	ENSOART00020041562.2	protein_coding	-	-	-	-	-	-	-	-	-	rs421994363	G	G/A	2089	-1	-	-	-	-	-	-	-	-	-	-	-
OAR11_35758049.1	0.00301997	G	A	0.3857	G	A	0.4856	0.0999	11	33692294	MODIFIER	-	ENSOARG00020026416	Transcript	ENSOART00020041564.2	protein_coding	-	-	-	-	-	-	-	-	-	rs421994363	G	G/A	737	-1	-	-	-	-	-	-	-	-	-	-	-
OAR11_35758049.1	0.00301997	G	A	0.3857	G	A	0.4856	0.0999	11	33692294	MODIFIER	-	ENSOARG00020026416	Transcript	ENSOART00020041565.2	protein_coding	-	-	-	-	-	-	-	-	-	rs421994363	G	G/A	737	-1	-	-	-	-	-	-	-	-	-	-	-
OAR11_35758049.1	0.00301997	G	A	0.3857	G	A	0.4856	0.0999	11	33692294	MODIFIER	-	ENSOARG00020026416	Transcript	ENSOART00020077587.1	protein_coding	-	-	-	-	-	-	-	-	-	rs421994363	G	G/A	2086	-1	-	-	-	-	-	-	-	-	-	-	-
OAR11_35758049.1	0.00301997	G	A	0.3857	G	A	0.4856	0.0999	11	33692294	MODIFIER	-	ENSOARG00020026416	Transcript	ENSOART00020080074.1	protein_coding	-	-	-	-	-	-	-	-	-	rs421994363	G	G/A	737	-1	-	-	-	-	-	-	-	-	-	-	-
OAR11_35758049.1	0.00301997	G	A	0.3857	G	A	0.4856	0.0999	11	33692294	MODIFIER	-	ENSOARG00020026416	Transcript	ENSOART00020080708.1	protein_coding	-	-	-	-	-	-	-	-	-	rs421994363	G	G/A	2086	-1	-	-	-	-	-	-	-	-	-	-	-
oar3_OAR9_16308358	0.00302318	C	A	0.1039	C	A	0.1958	0.0919	9	16370494	MODIFIER	TRAPPC9	ENSOARG00020005244	Transcript	ENSOART00020008023.2	protein_coding	-	18/23	-	-	-	-	-	-	-	-	C	C/A	-	1	-	HGNC	HGNC:30832	-	-	-	-	-	-	-	-
oar3_OAR9_16308358	0.00302318	C	A	0.1039	C	A	0.1958	0.0919	9	16370494	MODIFIER	TRAPPC9	ENSOARG00020005244	Transcript	ENSOART00020052299.1	protein_coding	-	18/22	-	-	-	-	-	-	-	-	C	C/A	-	1	-	HGNC	HGNC:30832	-	-	-	-	-	-	-	-
oar3_OAR21_19397936	0.00303778	G	A	0.3563	G	A	0.4643	0.108	21	17575419	MODIFIER	-	-	-	-	-	-	-	-	-	-	-	-	-	-	rs418579346	G	G/A	-	-	-	-	-	-	-	-	-	-	-	-	-
oar3_OAR10_60316454	0.00306784	A	G	0.4237	A	G	0.2908	0.1329	10	60419230	MODIFIER	-	-	-	-	-	-	-	-	-	-	-	-	-	-	-	A	A/G	-	-	-	-	-	-	-	-	-	-	-	-	-
OAR12_62830594.1	0.00308515	A	C	0.1483	A	C	0.2429	0.0946	12	57811060	MODIFIER	BRINP2	ENSOARG00020019593	Transcript	ENSOART00020030117.2	protein_coding	-	1/7	-	-	-	-	-	-	-	-	A	A/C	-	1	-	HGNC	HGNC:13746	-	-	-	-	-	-	-	-
oar3_OAR15_12969060	0.00309664	T	C	0.3174	T	C	0.4371	0.1197	15	13099105	MODIFIER	-	-	-	-	-	-	-	-	-	-	-	-	-	-	rs427007644	T	T/C	-	-	-	-	-	-	-	-	-	-	-	-	-
OAR1_67710995.1	0.00310608	T	C	0.2612	T	C	0.1818	0.0794	1	64675752	MODIFIER	-	-	-	-	-	-	-	-	-	-	-	-	-	-	rs400011782	T	T/C	-	-	-	-	-	-	-	-	-	-	-	-	-
OAR1_58938560.1	0.00312428	C	T	0.441	T	C	0.4301	0.1289	1	56625996	MODIFIER	-	-	-	-	-	-	-	-	-	-	-	-	-	-	rs410832953	C	C/T	-	-	-	-	-	-	-	-	-	-	-	-	-
OAR16_25012760.1	0.00313888	G	A	0.1356	G	A	0.2238	0.0882	16	23068095	MODIFIER	-	-	-	-	-	-	-	-	-	-	-	-	-	-	rs419348906	G	G/A	-	-	-	-	-	-	-	-	-	-	-	-	-
OAR13_76794899.1	0.00314443	T	C	0.2601	T	C	0.1549	0.1052	13	71777331	MODIFIER	PTPRT	ENSOARG00020014792	Transcript	ENSOART00020025633.2	protein_coding	-	1/30	-	-	-	-	-	-	-	-	T	T/C	-	-1	-	HGNC	HGNC:9682	-	-	-	-	-	-	-	-
OAR13_76794899.1	0.00314443	T	C	0.2601	T	C	0.1549	0.1052	13	71777331	MODIFIER	PTPRT	ENSOARG00020014792	Transcript	ENSOART00020047886.1	protein_coding	-	2/30	-	-	-	-	-	-	-	-	T	T/C	-	-1	-	HGNC	HGNC:9682	-	-	-	-	-	-	-	-
OAR13_76794899.1	0.00314443	T	C	0.2601	T	C	0.1549	0.1052	13	71777331	MODIFIER	PTPRT	ENSOARG00020014792	Transcript	ENSOART00020080949.1	protein_coding	-	1/30	-	-	-	-	-	-	-	-	T	T/C	-	-1	-	HGNC	HGNC:9682	-	-	-	-	-	-	-	-
OAR13_76794899.1	0.00314443	T	C	0.2601	T	C	0.1549	0.1052	13	71777331	MODIFIER	PTPRT	ENSOARG00020014792	Transcript	ENSOART00020081829.1	protein_coding	-	2/32	-	-	-	-	-	-	-	-	T	T/C	-	-1	-	HGNC	HGNC:9682	-	-	-	-	-	-	-	-
OAR1_206165051.1	0.00317009	C	T	0.3483	C	T	0.2413	0.107	1	193610632	MODIFIER	-	-	-	-	-	-	-	-	-	-	-	-	-	-	rs418090876	C	C/T	-	-	-	-	-	-	-	-	-	-	-	-	-
Chr20:22143199	0.0032134	G	T	0.3146	G	T	0.2133	0.1013	20	22031036	MODERATE	RHAG	ENSOARG00020014891	Transcript	ENSOART00020022808.2	protein_coding	9/10	-	-	-	1321	1232	411	S/Y	tCt/tAt	-	G	G/T	-	-1	-	HGNC	HGNC:10006	-	-	-	-	-	-	-	-
Chr20:22143199	0.0032134	G	T	0.3146	G	T	0.2133	0.1013	20	22031036	MODIFIER	RHAG	ENSOARG00020014891	Transcript	ENSOART00020022961.2	protein_coding	8/8	-	-	-	1199	-	-	-	-	-	G	G/T	-	-1	-	HGNC	HGNC:10006	-	-	-	-	-	-	-	-
Chr20:22143199	0.0032134	G	T	0.3146	G	T	0.2133	0.1013	20	22031036	MODIFIER	RHAG	ENSOARG00020014891	Transcript	ENSOART00020023003.2	protein_coding	-	8/8	-	-	-	-	-	-	-	-	G	G/T	-	-1	-	HGNC	HGNC:10006	-	-	-	-	-	-	-	-
Chr20:22143199	0.0032134	G	T	0.3146	G	T	0.2133	0.1013	20	22031036	MODERATE	RHAG	ENSOARG00020014891	Transcript	ENSOART00020023055.2	protein_coding	9/10	-	-	-	1321	1208	403	S/Y	tCt/tAt	-	G	G/T	-	-1	-	HGNC	HGNC:10006	-	-	-	-	-	-	-	-
Chr20:22143199	0.0032134	G	T	0.3146	G	T	0.2133	0.1013	20	22031036	MODIFIER	U6	ENSOARG00020014867	Transcript	ENSOART00020022741.2	snRNA	-	-	-	-	-	-	-	-	-	-	G	G/T	4307	-1	-	RFAM	-	-	-	-	-	-	-	-	-
oar3_OAR6_92561014	0.00323111	C	A	0.2949	C	A	0.3811	0.0862	6	93649172	MODIFIER	FRAS1	ENSOARG00020006780	Transcript	ENSOART00020011095.2	protein_coding	-	2/73	-	-	-	-	-	-	-	-	C	C/A	-	1	-	HGNC	HGNC:19185	-	-	-	-	-	-	-	-
oar3_OAR6_92561014	0.00323111	C	A	0.2949	C	A	0.3811	0.0862	6	93649172	MODIFIER	FRAS1	ENSOARG00020006780	Transcript	ENSOART00020060147.1	protein_coding	-	2/72	-	-	-	-	-	-	-	-	C	C/A	-	1	-	HGNC	HGNC:19185	-	-	-	-	-	-	-	-
oar3_OAR1_2447945	0.00332155	G	A	0.4635	A	G	0.4091	0.1274	1	2653259	MODIFIER	-	-	-	-	-	-	-	-	-	-	-	-	-	-	rs407991517	G	G/A	-	-	-	-	-	-	-	-	-	-	-	-	-
oar3_OAR3_139757147	0.00338934	T	C	0.4148	T	C	0.2852	0.1296	3	139960794	MODIFIER	-	-	-	-	-	-	-	-	-	-	-	-	-	-	-	T	T/C	-	-	-	-	-	-	-	-	-	-	-	-	-
s20423.1	0.00340658	C	T	0.3333	C	T	0.4348	0.1015	9	14772827	MODIFIER	ADGRB1	ENSOARG00020003350	Transcript	ENSOART00020005386.2	protein_coding	-	16/29	-	-	-	-	-	-	-	rs413231583	C	C/T	-	-1	-	HGNC	HGNC:943	-	-	-	-	-	-	-	-
OAR25_16588193.1	0.00341929	C	T	0.4775	T	C	0.3811	0.1414	25	15481468	MODIFIER	ANK3	ENSOARG00020023359	Transcript	ENSOART00020036914.2	protein_coding	-	3/44	-	-	-	-	-	-	-	-	C	C/T	-	-1	-	HGNC	HGNC:494	-	-	-	-	-	-	-	-
OAR25_16588193.1	0.00341929	C	T	0.4775	T	C	0.3811	0.1414	25	15481468	MODIFIER	ANK3	ENSOARG00020023359	Transcript	ENSOART00020037268.2	protein_coding	-	2/43	-	-	-	-	-	-	-	-	C	C/T	-	-1	-	HGNC	HGNC:494	-	-	-	-	-	-	-	-
OAR25_16588193.1	0.00341929	C	T	0.4775	T	C	0.3811	0.1414	25	15481468	MODIFIER	ANK3	ENSOARG00020023359	Transcript	ENSOART00020037418.2	protein_coding	-	2/44	-	-	-	-	-	-	-	-	C	C/T	-	-1	-	HGNC	HGNC:494	-	-	-	-	-	-	-	-
OAR25_16588193.1	0.00341929	C	T	0.4775	T	C	0.3811	0.1414	25	15481468	MODIFIER	ANK3	ENSOARG00020023359	Transcript	ENSOART00020048433.1	protein_coding	-	2/42	-	-	-	-	-	-	-	-	C	C/T	-	-1	-	HGNC	HGNC:494	-	-	-	-	-	-	-	-
OAR25_16588193.1	0.00341929	C	T	0.4775	T	C	0.3811	0.1414	25	15481468	MODIFIER	ANK3	ENSOARG00020023359	Transcript	ENSOART00020063941.1	protein_coding	-	1/44	-	-	-	-	-	-	-	-	C	C/T	-	-1	-	HGNC	HGNC:494	-	-	-	-	-	-	-	-
OAR25_16588193.1	0.00341929	C	T	0.4775	T	C	0.3811	0.1414	25	15481468	MODIFIER	ANK3	ENSOARG00020023359	Transcript	ENSOART00020065966.1	protein_coding	-	1/41	-	-	-	-	-	-	-	-	C	C/T	-	-1	-	HGNC	HGNC:494	-	-	-	-	-	-	-	-
OAR26_12701751.1	0.00342158	G	A	0.4551	A	G	0.4266	0.1183	26	10617652	MODIFIER	-	ENSOARG00020026608	Transcript	ENSOART00020045771.1	lncRNA	-	-	-	-	-	-	-	-	-	rs412873354	G	G/A	2545	1	-	-	-	-	-	-	-	-	-	-	-
oar3_OAR15_13729496	0.00346557	T	C	0.2893	T	C	0.4056	0.1163	15	13872410	MODIFIER	MAML2	ENSOARG00020023344	Transcript	ENSOART00020036352.2	protein_coding	-	2/4	-	-	-	-	-	-	-	-	T	T/C	-	1	-	HGNC	HGNC:16259	-	-	-	-	-	-	-	-
OAR1_165683429.1	0.00358765	C	T	0.3399	C	T	0.4301	0.0902	1	156383868	MODIFIER	-	-	-	-	-	-	-	-	-	-	-	-	-	-	-	C	C/T	-	-	-	-	-	-	-	-	-	-	-	-	-
Chr2:7970138	0.00360793	A	T	0.4494	A	T	0.3112	0.1382	2	8016796	MODIFIER	-	ENSOARG00020036154	Transcript	ENSOART00020060240.1	lncRNA	-	1/1	-	-	-	-	-	-	-	rs1092214584	A	A/T	-	1	-	-	-	-	-	-	-	-	-	-	-
oar3_OAR15_11868955	0.00363792	T	G	0.2316	T	G	0.3427	0.1111	15	12034543	MODIFIER	-	-	-	-	-	-	-	-	-	-	-	-	-	-	-	T	T/G	-	-	-	-	-	-	-	-	-	-	-	-	-
oar3_OAR2_57465242	0.00364071	C	T	0.2206	C	T	0.3111	0.0905	2	57974508	MODIFIER	-	-	-	-	-	-	-	-	-	-	-	-	-	-	rs408880315	C	C/T	-	-	-	-	-	-	-	-	-	-	-	-	-
oar3_OAR6_31612123	0.00364124	G	A	0.4354	A	G	0.4476	0.117	6	32269429	MODIFIER	GRID2	ENSOARG00020021077	Transcript	ENSOART00020033391.2	protein_coding	-	2/15	-	-	-	-	-	-	-	rs418913926	G	G/A	-	-1	-	HGNC	HGNC:4576	-	-	-	-	-	-	-	-
oar3_OAR6_31612123	0.00364124	G	A	0.4354	A	G	0.4476	0.117	6	32269429	MODIFIER	GRID2	ENSOARG00020021077	Transcript	ENSOART00020033656.2	protein_coding	-	2/15	-	-	-	-	-	-	-	rs418913926	G	G/A	-	-1	-	HGNC	HGNC:4576	-	-	-	-	-	-	-	-
oar3_OAR6_31612123	0.00364124	G	A	0.4354	A	G	0.4476	0.117	6	32269429	MODIFIER	GRID2	ENSOARG00020021077	Transcript	ENSOART00020033681.2	protein_coding	-	2/14	-	-	-	-	-	-	-	rs418913926	G	G/A	-	-1	-	HGNC	HGNC:4576	-	-	-	-	-	-	-	-
oar3_OAR6_31612123	0.00364124	G	A	0.4354	A	G	0.4476	0.117	6	32269429	MODIFIER	GRID2	ENSOARG00020021077	Transcript	ENSOART00020033731.2	protein_coding	-	1/3	-	-	-	-	-	-	-	rs418913926	G	G/A	-	-1	-	HGNC	HGNC:4576	-	-	-	-	-	-	-	-
oar3_OAR6_31612737	0.00364124	G	A	0.4354	A	G	0.4476	0.117	6	32270039	MODIFIER	GRID2	ENSOARG00020021077	Transcript	ENSOART00020033391.2	protein_coding	-	2/15	-	-	-	-	-	-	-	rs415443784	G	G/A	-	-1	-	HGNC	HGNC:4576	-	-	-	-	-	-	-	-
oar3_OAR6_31612737	0.00364124	G	A	0.4354	A	G	0.4476	0.117	6	32270039	MODIFIER	GRID2	ENSOARG00020021077	Transcript	ENSOART00020033656.2	protein_coding	-	2/15	-	-	-	-	-	-	-	rs415443784	G	G/A	-	-1	-	HGNC	HGNC:4576	-	-	-	-	-	-	-	-
oar3_OAR6_31612737	0.00364124	G	A	0.4354	A	G	0.4476	0.117	6	32270039	MODIFIER	GRID2	ENSOARG00020021077	Transcript	ENSOART00020033681.2	protein_coding	-	2/14	-	-	-	-	-	-	-	rs415443784	G	G/A	-	-1	-	HGNC	HGNC:4576	-	-	-	-	-	-	-	-
oar3_OAR6_31612737	0.00364124	G	A	0.4354	A	G	0.4476	0.117	6	32270039	MODIFIER	GRID2	ENSOARG00020021077	Transcript	ENSOART00020033731.2	protein_coding	-	1/3	-	-	-	-	-	-	-	rs415443784	G	G/A	-	-1	-	HGNC	HGNC:4576	-	-	-	-	-	-	-	-
oar3_OAR6_31630891	0.00364124	C	T	0.4354	T	C	0.4476	0.117	6	32288378	MODIFIER	GRID2	ENSOARG00020021077	Transcript	ENSOART00020033391.2	protein_coding	-	2/15	-	-	-	-	-	-	-	rs420010073	C	C/T	-	-1	-	HGNC	HGNC:4576	-	-	-	-	-	-	-	-
oar3_OAR6_31630891	0.00364124	C	T	0.4354	T	C	0.4476	0.117	6	32288378	MODIFIER	GRID2	ENSOARG00020021077	Transcript	ENSOART00020033656.2	protein_coding	-	2/15	-	-	-	-	-	-	-	rs420010073	C	C/T	-	-1	-	HGNC	HGNC:4576	-	-	-	-	-	-	-	-
oar3_OAR6_31630891	0.00364124	C	T	0.4354	T	C	0.4476	0.117	6	32288378	MODIFIER	GRID2	ENSOARG00020021077	Transcript	ENSOART00020033681.2	protein_coding	-	2/14	-	-	-	-	-	-	-	rs420010073	C	C/T	-	-1	-	HGNC	HGNC:4576	-	-	-	-	-	-	-	-
s37460.1	0.00367151	T	C	0.3146	T	C	0.1923	0.1223	1	238796064	MODIFIER	-	-	-	-	-	-	-	-	-	-	-	-	-	-	-	T	T/C	-	-	-	-	-	-	-	-	-	-	-	-	-
OAR7_29672959_X.1	0.00368329	T	C	0.2079	T	C	0.1154	0.0925	7	27126525	MODIFIER	RYR3	ENSOARG00020004398	Transcript	ENSOART00020007829.2	protein_coding	-	28/101	-	-	-	-	-	-	-	-	T	T/C	-	-1	-	HGNC	HGNC:10485	-	-	-	-	-	-	-	-
OAR7_29672959_X.1	0.00368329	T	C	0.2079	T	C	0.1154	0.0925	7	27126525	MODIFIER	RYR3	ENSOARG00020004398	Transcript	ENSOART00020007972.2	protein_coding	-	28/102	-	-	-	-	-	-	-	-	T	T/C	-	-1	-	HGNC	HGNC:10485	-	-	-	-	-	-	-	-
OAR7_29672959_X.1	0.00368329	T	C	0.2079	T	C	0.1154	0.0925	7	27126525	MODIFIER	RYR3	ENSOARG00020004398	Transcript	ENSOART00020070889.1	protein_coding	-	28/103	-	-	-	-	-	-	-	-	T	T/C	-	-1	-	HGNC	HGNC:10485	-	-	-	-	-	-	-	-
oar3_OAR9_15727725	0.00374969	C	T	0.3989	C	T	0.3007	0.0982	9	15789418	MODIFIER	PTK2	ENSOARG00020004232	Transcript	ENSOART00020007361.2	protein_coding	-	1/33	-	-	-	-	-	-	-	-	C	C/T	-	1	-	HGNC	HGNC:9611	-	-	-	-	-	-	-	-
oar3_OAR9_15727725	0.00374969	C	T	0.3989	C	T	0.3007	0.0982	9	15789418	MODIFIER	PTK2	ENSOARG00020004232	Transcript	ENSOART00020007639.2	protein_coding	-	1/32	-	-	-	-	-	-	-	-	C	C/T	-	1	-	HGNC	HGNC:9611	-	-	-	-	-	-	-	-
oar3_OAR9_15727725	0.00374969	C	T	0.3989	C	T	0.3007	0.0982	9	15789418	MODIFIER	PTK2	ENSOARG00020004232	Transcript	ENSOART00020007799.2	protein_coding	-	1/32	-	-	-	-	-	-	-	-	C	C/T	-	1	-	HGNC	HGNC:9611	-	-	-	-	-	-	-	-
oar3_OAR9_15727725	0.00374969	C	T	0.3989	C	T	0.3007	0.0982	9	15789418	MODIFIER	PTK2	ENSOARG00020004232	Transcript	ENSOART00020045341.1	protein_coding	-	1/6	-	-	-	-	-	-	-	-	C	C/T	-	1	-	HGNC	HGNC:9611	-	-	-	-	-	-	-	-
oar3_OAR9_15727725	0.00374969	C	T	0.3989	C	T	0.3007	0.0982	9	15789418	MODIFIER	PTK2	ENSOARG00020004232	Transcript	ENSOART00020051186.1	protein_coding	-	1/5	-	-	-	-	-	-	-	-	C	C/T	-	1	-	HGNC	HGNC:9611	-	-	-	-	-	-	-	-
s61553.1	0.00375224	T	C	0.3652	T	C	0.2552	0.11	2	136950186	MODIFIER	RAPGEF4	ENSOARG00020001967	Transcript	ENSOART00020003014.2	protein_coding	-	8/30	-	-	-	-	-	-	-	-	T	T/C	-	-1	-	HGNC	HGNC:16626	-	-	-	-	-	-	-	-
s61553.1	0.00375224	T	C	0.3652	T	C	0.2552	0.11	2	136950186	MODIFIER	RAPGEF4	ENSOARG00020001967	Transcript	ENSOART00020003121.2	protein_coding	-	8/27	-	-	-	-	-	-	-	-	T	T/C	-	-1	-	HGNC	HGNC:16626	-	-	-	-	-	-	-	-
s61553.1	0.00375224	T	C	0.3652	T	C	0.2552	0.11	2	136950186	MODIFIER	RAPGEF4	ENSOARG00020001967	Transcript	ENSOART00020003156.2	protein_coding	-	3/25	-	-	-	-	-	-	-	-	T	T/C	-	-1	-	HGNC	HGNC:16626	-	-	-	-	-	-	-	-
s61553.1	0.00375224	T	C	0.3652	T	C	0.2552	0.11	2	136950186	MODIFIER	RAPGEF4	ENSOARG00020001967	Transcript	ENSOART00020003225.2	protein_coding	-	5/27	-	-	-	-	-	-	-	-	T	T/C	-	-1	-	HGNC	HGNC:16626	-	-	-	-	-	-	-	-
s61553.1	0.00375224	T	C	0.3652	T	C	0.2552	0.11	2	136950186	MODIFIER	RAPGEF4	ENSOARG00020001967	Transcript	ENSOART00020003297.2	protein_coding	-	5/27	-	-	-	-	-	-	-	-	T	T/C	-	-1	-	HGNC	HGNC:16626	-	-	-	-	-	-	-	-
s61553.1	0.00375224	T	C	0.3652	T	C	0.2552	0.11	2	136950186	MODIFIER	RAPGEF4	ENSOARG00020001967	Transcript	ENSOART00020003373.2	protein_coding	-	7/29	-	-	-	-	-	-	-	-	T	T/C	-	-1	-	HGNC	HGNC:16626	-	-	-	-	-	-	-	-
s61553.1	0.00375224	T	C	0.3652	T	C	0.2552	0.11	2	136950186	MODIFIER	RAPGEF4	ENSOARG00020001967	Transcript	ENSOART00020003436.2	protein_coding	-	6/25	-	-	-	-	-	-	-	-	T	T/C	-	-1	-	HGNC	HGNC:16626	-	-	-	-	-	-	-	-
OAR1_256175975.1	0.00382709	A	G	0.3062	A	G	0.4266	0.1204	1	239682582	MODIFIER	-	ENSOARG00020005196	Transcript	ENSOART00020007954.2	protein_coding	-	-	-	-	-	-	-	-	-	-	A	A/G	2173	1	-	-	-	-	-	-	-	-	-	-	-
OAR1_256175975.1	0.00382709	A	G	0.3062	A	G	0.4266	0.1204	1	239682582	MODIFIER	-	ENSOARG00020005196	Transcript	ENSOART00020007975.2	protein_coding	-	-	-	-	-	-	-	-	-	-	A	A/G	2173	1	-	-	-	-	-	-	-	-	-	-	-
OAR6_110232903.1	0.00388563	G	A	0.4073	A	G	0.4755	0.1172	6	101238827	MODIFIER	ARHGAP24	ENSOARG00020017927	Transcript	ENSOART00020027821.2	protein_coding	-	3/9	-	-	-	-	-	-	-	-	G	G/A	-	1	-	HGNC	HGNC:25361	-	-	-	-	-	-	-	-
s71719.1	0.00390469	G	A	0.4747	G	A	0.3636	0.1111	7	26993405	MODIFIER	RYR3	ENSOARG00020004398	Transcript	ENSOART00020007829.2	protein_coding	-	65/101	-	-	-	-	-	-	-	-	G	G/A	-	-1	-	HGNC	HGNC:10485	-	-	-	-	-	-	-	-
s71719.1	0.00390469	G	A	0.4747	G	A	0.3636	0.1111	7	26993405	MODIFIER	RYR3	ENSOARG00020004398	Transcript	ENSOART00020007972.2	protein_coding	-	65/102	-	-	-	-	-	-	-	-	G	G/A	-	-1	-	HGNC	HGNC:10485	-	-	-	-	-	-	-	-
s71719.1	0.00390469	G	A	0.4747	G	A	0.3636	0.1111	7	26993405	MODIFIER	RYR3	ENSOARG00020004398	Transcript	ENSOART00020070889.1	protein_coding	-	65/103	-	-	-	-	-	-	-	-	G	G/A	-	-1	-	HGNC	HGNC:10485	-	-	-	-	-	-	-	-
oar3_OAR6_54856010	0.00390664	T	C	0.3989	T	C	0.2832	0.1157	6	55598027	MODIFIER	-	-	-	-	-	-	-	-	-	-	-	-	-	-	-	T	T/C	-	-	-	-	-	-	-	-	-	-	-	-	-
oar3_OAR7_30677888	0.00393241	T	C	0.3258	T	C	0.4336	0.1078	7	31868403	MODIFIER	-	-	-	-	-	-	-	-	-	-	-	-	-	-	-	T	T/C	-	-	-	-	-	-	-	-	-	-	-	-	-
oar3_OAR10_23916877	0.00394295	A	G	0.2147	A	G	0.3156	0.1009	10	23910266	MODIFIER	-	-	-	-	-	-	-	-	-	-	-	-	-	-	rs401429186	A	A/G	-	-	-	-	-	-	-	-	-	-	-	-	-
oar3_OAR3_170750283	0.00397022	A	G	0.1836	A	G	0.09155	0.09205	3	171270853	MODIFIER	-	ENSOARG00020035740	Transcript	ENSOART00020048796.1	protein_coding	-	1/1	-	-	-	-	-	-	-	rs410953359	A	A/G	-	-1	-	-	-	-	-	-	-	-	-	-	-
oar3_OAR10_50746915	0.0039996	C	T	0.3258	C	T	0.2343	0.0915	10	50887385	MODIFIER	-	ENSOARG00020027519	Transcript	ENSOART00020049667.1	protein_coding	-	1/1	-	-	-	-	-	-	-	-	C	C/T	-	-1	-	-	-	-	-	-	-	-	-	-	-
oar3_OAR5_27021239	0.0040027	T	C	0.05899	T	C	0.1084	0.04941	5	27241590	MODIFIER	-	ENSOARG00020038805	Transcript	ENSOART00020042987.1	lncRNA	-	4/4	-	-	-	-	-	-	-	-	T	T/C	-	1	-	-	-	-	-	-	-	-	-	-	-
s58657.1	0.00402235	C	T	0.3371	C	T	0.4371	0.1	26	6369727	MODIFIER	-	ENSOARG00020024544	Transcript	ENSOART00020038409.2	protein_coding	-	-	-	-	-	-	-	-	-	-	C	C/T	2747	1	-	-	-	-	-	-	-	-	-	-	-
oar3_OAR20_48923959	0.00408007	C	T	0.2557	C	T	0.3873	0.1316	20	49113973	MODIFIER	-	ENSOARG00020039148	Transcript	ENSOART00020072474.1	lncRNA	-	-	-	-	-	-	-	-	-	-	C	C/T	4107	1	-	-	-	-	-	-	-	-	-	-	-
oar3_OAR20_48923959	0.00408007	C	T	0.2557	C	T	0.3873	0.1316	20	49113973	MODIFIER	-	ENSOARG00020039148	Transcript	ENSOART00020081466.1	lncRNA	1/3	-	-	-	57	-	-	-	-	-	C	C/T	-	1	-	-	-	-	-	-	-	-	-	-	-
oar3_OAR11_34901139	0.00410438	C	A	0.441	A	C	0.4545	0.1045	11	35108060	MODIFIER	KCNJ12	ENSOARG00020033666	Transcript	ENSOART00020048820.1	protein_coding	4/4	-	-	-	8283	-	-	-	-	-	C	C/A	-	1	-	Uniprot_gn	-	-	-	-	-	-	-	-	-
oar3_OAR11_34901139	0.00410438	C	A	0.441	A	C	0.4545	0.1045	11	35108060	MODIFIER	KCNJ12	ENSOARG00020033666	Transcript	ENSOART00020053198.1	protein_coding	4/4	-	-	-	9308	-	-	-	-	-	C	C/A	-	1	-	Uniprot_gn	-	-	-	-	-	-	-	-	-
oar3_OAR11_34901139	0.00410438	C	A	0.441	A	C	0.4545	0.1045	11	35108060	MODIFIER	KCNJ12	ENSOARG00020033666	Transcript	ENSOART00020053863.1	protein_coding	4/4	-	-	-	8895	-	-	-	-	-	C	C/A	-	1	-	Uniprot_gn	-	-	-	-	-	-	-	-	-
oar3_OAR11_34901139	0.00410438	C	A	0.441	A	C	0.4545	0.1045	11	35108060	MODIFIER	KCNJ12	ENSOARG00020033666	Transcript	ENSOART00020061904.1	protein_coding	5/5	-	-	-	8354	-	-	-	-	-	C	C/A	-	1	-	Uniprot_gn	-	-	-	-	-	-	-	-	-
oar3_OAR11_34901139	0.00410438	C	A	0.441	A	C	0.4545	0.1045	11	35108060	MODIFIER	KCNJ12	ENSOARG00020033666	Transcript	ENSOART00020065492.1	protein_coding	-	-	-	-	-	-	-	-	-	-	C	C/A	3118	1	-	Uniprot_gn	-	-	-	-	-	-	-	-	-
oar3_OAR11_34901139	0.00410438	C	A	0.441	A	C	0.4545	0.1045	11	35108060	MODIFIER	KCNJ12	ENSOARG00020033666	Transcript	ENSOART00020068190.1	protein_coding	3/5	-	-	-	9251	-	-	-	-	-	C	C/A	-	1	-	Uniprot_gn	-	-	-	-	-	-	-	-	-
oar3_OAR11_34901139	0.00410438	C	A	0.441	A	C	0.4545	0.1045	11	35108060	MODIFIER	KCNJ12	ENSOARG00020033666	Transcript	ENSOART00020078298.1	protein_coding	5/5	-	-	-	8606	-	-	-	-	-	C	C/A	-	1	-	Uniprot_gn	-	-	-	-	-	-	-	-	-
oar3_OAR11_34901139	0.00410438	C	A	0.441	A	C	0.4545	0.1045	11	35108060	MODIFIER	KCNJ12	ENSOARG00020033666	Transcript	ENSOART00020078644.1	protein_coding	2/2	-	-	-	8123	-	-	-	-	-	C	C/A	-	1	-	Uniprot_gn	-	-	-	-	-	-	-	-	-
oar3_OAR11_34901139	0.00410438	C	A	0.441	A	C	0.4545	0.1045	11	35108060	MODIFIER	KCNJ12	ENSOARG00020033666	Transcript	ENSOART00020080767.1	protein_coding	3/3	-	-	-	8323	-	-	-	-	-	C	C/A	-	1	-	Uniprot_gn	-	-	-	-	-	-	-	-	-
oar3_OAR11_34901139	0.00410438	C	A	0.441	A	C	0.4545	0.1045	11	35108060	MODIFIER	KCNJ12	ENSOARG00020033666	Transcript	ENSOART00020081735.1	protein_coding	3/3	-	-	-	8226	-	-	-	-	-	C	C/A	-	1	-	Uniprot_gn	-	-	-	-	-	-	-	-	-
OAR5_31327589.1	0.00412699	C	T	0.4185	T	C	0.4266	0.1549	5	28504726	MODIFIER	-	ENSOARG00020005946	Transcript	ENSOART00020009212.2	protein_coding	-	6/6	-	-	-	-	-	-	-	-	C	C/T	-	-1	-	-	-	-	-	-	-	-	-	-	-
OAR5_31327589.1	0.00412699	C	T	0.4185	T	C	0.4266	0.1549	5	28504726	MODIFIER	PPIC	ENSOARG00020005926	Transcript	ENSOART00020009128.2	protein_coding	-	5/5	-	-	-	-	-	-	-	-	C	C/T	-	1	-	HGNC	HGNC:9256	-	-	-	-	-	-	-	-
oar3_OAR3_190858419	0.0041486	T	C	0.2584	T	C	0.1469	0.1115	3	191657700	MODIFIER	-	-	-	-	-	-	-	-	-	-	-	-	-	-	rs399711164	T	T/C	-	-	-	-	-	-	-	-	-	-	-	-	-
OAR22_11266064.1	0.00416114	T	C	0.4551	C	T	0.4196	0.1253	22	9398369	MODIFIER	-	-	-	-	-	-	-	-	-	-	-	-	-	-	-	T	T/C	-	-	-	-	-	-	-	-	-	-	-	-	-
oar3_OAR14_16827529	0.00419532	A	G	0.4916	G	A	0.3916	0.1168	14	16862148	MODIFIER	-	-	-	-	-	-	-	-	-	-	-	-	-	-	-	A	A/G	-	-	-	-	-	-	-	-	-	-	-	-	-
OAR20_33339130.1	0.00420752	T	C	0.2921	T	C	0.4126	0.1205	20	30423740	MODIFIER	-	-	-	-	-	-	-	-	-	-	-	-	-	-	-	T	T/C	-	-	-	-	-	-	-	-	-	-	-	-	-
oar3_OAR14_22466100	0.0042141	G	A	0.1882	G	A	0.2937	0.1055	14	22482333	MODIFIER	-	-	-	-	-	-	-	-	-	-	-	-	-	-	rs399923717	G	G/A	-	-	-	-	-	-	-	-	-	-	-	-	-
Chr3:171582515	0.00427166	T	G	0.486	G	T	0.3811	0.1329	3	172102466	MODIFIER	U6	ENSOARG00020027599	Transcript	ENSOART00020080058.1	snRNA	-	-	-	-	-	-	-	-	-	-	T	T/G	779	-1	-	RFAM	-	-	-	-	-	-	-	-	-
OAR3_209554027.1	0.00427244	A	C	0.3708	A	C	0.486	0.1152	3	195597421	MODIFIER	RNase_MRP	ENSOARG00020000618	Transcript	ENSOART00020000805.2	ribozyme	-	-	-	-	-	-	-	-	-	rs407777464	A	A/C	2794	-1	-	RFAM	-	-	-	-	-	-	-	-	-
s15706.1	0.00430364	G	A	0.4242	G	A	0.3287	0.0955	11	36968045	MODIFIER	-	-	-	-	-	-	-	-	-	-	-	-	-	-	rs420529252	G	G/A	-	-	-	-	-	-	-	-	-	-	-	-	-
Chr22:24514407	0.00430699	G	A	0.2388	G	A	0.1329	0.1059	22	25123379	MODIFIER	SORCS3	ENSOARG00020011044	Transcript	ENSOART00020017466.2	protein_coding	-	2/26	-	-	-	-	-	-	-	rs413964607	G	G/A	-	1	-	HGNC	HGNC:16699	-	-	-	-	-	-	-	-
Chr1:86614960	0.00431631	G	T	0.128	G	T	0.2107	0.0827	1	87468578	MODIFIER	SLC6A17	ENSOARG00020008988	Transcript	ENSOART00020013903.2	protein_coding	-	1/11	-	-	-	-	-	-	-	-	G	G/T	-	1	-	HGNC	HGNC:31399	-	-	-	-	-	-	-	-
oar3_OAR3_33287457	0.0043641	C	T	0.4438	T	C	0.4441	0.1121	3	33412200	MODIFIER	GAREM2	ENSOARG00020000249	Transcript	ENSOART00020000296.2	protein_coding	-	2/7	-	-	-	-	-	-	-	-	C	C/T	-	1	-	HGNC	HGNC:27172	-	-	-	-	-	-	-	-
OAR6_78103269.1	0.00437928	A	G	0.3475	A	G	0.4714	0.1239	6	72384502	MODIFIER	CRACD	ENSOARG00020019405	Transcript	ENSOART00020029808.2	protein_coding	-	1/9	-	-	-	-	-	-	-	-	A	A/G	-	1	-	HGNC	HGNC:29219	-	-	-	-	-	-	-	-
OAR6_78103269.1	0.00437928	A	G	0.3475	A	G	0.4714	0.1239	6	72384502	MODIFIER	CRACD	ENSOARG00020019405	Transcript	ENSOART00020079256.1	protein_coding	-	1/10	-	-	-	-	-	-	-	-	A	A/G	-	1	-	HGNC	HGNC:29219	-	-	-	-	-	-	-	-
oar3_OAR20_31146787	0.00438903	A	G	0.2725	A	G	0.3846	0.1121	20	31220377	MODIFIER	SCGN	ENSOARG00020008347	Transcript	ENSOART00020012870.2	protein_coding	-	2/10	-	-	-	-	-	-	-	rs403038288	A	A/G	-	-1	-	HGNC	HGNC:16941	-	-	-	-	-	-	-	-
oar3_OAR20_31146787	0.00438903	A	G	0.2725	A	G	0.3846	0.1121	20	31220377	MODIFIER	SCGN	ENSOARG00020008347	Transcript	ENSOART00020073731.1	protein_coding	-	3/10	-	-	-	-	-	-	-	rs403038288	A	A/G	-	-1	-	HGNC	HGNC:16941	-	-	-	-	-	-	-	-
oar3_OAR20_31146787	0.00438903	A	G	0.2725	A	G	0.3846	0.1121	20	31220377	MODIFIER	SCGN	ENSOARG00020008347	Transcript	ENSOART00020079751.1	protein_coding	-	2/9	-	-	-	-	-	-	-	rs403038288	A	A/G	-	-1	-	HGNC	HGNC:16941	-	-	-	-	-	-	-	-
OAR10_32357172.1	0.00444283	A	C	0.2444	A	C	0.3427	0.0983	10	32169364	MODIFIER	PAN3	ENSOARG00020010540	Transcript	ENSOART00020016675.2	protein_coding	-	6/19	-	-	-	-	-	-	-	rs415056861	A	A/C	-	-1	-	Uniprot_gn	-	-	-	-	-	-	-	-	-
OAR10_32357172.1	0.00444283	A	C	0.2444	A	C	0.3427	0.0983	10	32169364	MODIFIER	PAN3	ENSOARG00020010540	Transcript	ENSOART00020016797.2	protein_coding	-	6/18	-	-	-	-	-	-	-	rs415056861	A	A/C	-	-1	-	Uniprot_gn	-	-	-	-	-	-	-	-	-
OAR10_32357172.1	0.00444283	A	C	0.2444	A	C	0.3427	0.0983	10	32169364	MODIFIER	PAN3	ENSOARG00020010540	Transcript	ENSOART00020017021.2	protein_coding	-	5/18	-	-	-	-	-	-	-	rs415056861	A	A/C	-	-1	-	Uniprot_gn	-	-	-	-	-	-	-	-	-
OAR10_32357172.1	0.00444283	A	C	0.2444	A	C	0.3427	0.0983	10	32169364	MODIFIER	PAN3	ENSOARG00020010540	Transcript	ENSOART00020017289.2	protein_coding	-	6/18	-	-	-	-	-	-	-	rs415056861	A	A/C	-	-1	-	Uniprot_gn	-	-	-	-	-	-	-	-	-
oar3_OAR10_32102734	0.00444283	G	A	0.2444	G	A	0.3427	0.0983	10	32161764	MODIFIER	PAN3	ENSOARG00020010540	Transcript	ENSOART00020016675.2	protein_coding	-	6/19	-	-	-	-	-	-	-	rs417986890	G	G/A	-	-1	-	Uniprot_gn	-	-	-	-	-	-	-	-	-
oar3_OAR10_32102734	0.00444283	G	A	0.2444	G	A	0.3427	0.0983	10	32161764	MODIFIER	PAN3	ENSOARG00020010540	Transcript	ENSOART00020016797.2	protein_coding	-	6/18	-	-	-	-	-	-	-	rs417986890	G	G/A	-	-1	-	Uniprot_gn	-	-	-	-	-	-	-	-	-
oar3_OAR10_32102734	0.00444283	G	A	0.2444	G	A	0.3427	0.0983	10	32161764	MODIFIER	PAN3	ENSOARG00020010540	Transcript	ENSOART00020017021.2	protein_coding	-	5/18	-	-	-	-	-	-	-	rs417986890	G	G/A	-	-1	-	Uniprot_gn	-	-	-	-	-	-	-	-	-
oar3_OAR10_32102734	0.00444283	G	A	0.2444	G	A	0.3427	0.0983	10	32161764	MODIFIER	PAN3	ENSOARG00020010540	Transcript	ENSOART00020017289.2	protein_coding	-	6/18	-	-	-	-	-	-	-	rs417986890	G	G/A	-	-1	-	Uniprot_gn	-	-	-	-	-	-	-	-	-
OAR3_123221150.1	0.00444404	A	C	0.3539	A	C	0.2448	0.1091	3	115728741	MODIFIER	PAWR	ENSOARG00020005665	Transcript	ENSOART00020008741.2	protein_coding	-	3/8	-	-	-	-	-	-	-	rs430376224	A	A/C	-	-1	-	HGNC	HGNC:8614	-	-	-	-	-	-	-	-
OAR3_123221150.1	0.00444404	A	C	0.3539	A	C	0.2448	0.1091	3	115728741	MODIFIER	PAWR	ENSOARG00020005665	Transcript	ENSOART00020008794.2	protein_coding	-	2/7	-	-	-	-	-	-	-	rs430376224	A	A/C	-	-1	-	HGNC	HGNC:8614	-	-	-	-	-	-	-	-
OAR3_123221150.1	0.00444404	A	C	0.3539	A	C	0.2448	0.1091	3	115728741	MODIFIER	PAWR	ENSOARG00020005665	Transcript	ENSOART00020008806.2	protein_coding	-	2/7	-	-	-	-	-	-	-	rs430376224	A	A/C	-	-1	-	HGNC	HGNC:8614	-	-	-	-	-	-	-	-
OAR3_123221150.1	0.00444404	A	C	0.3539	A	C	0.2448	0.1091	3	115728741	MODIFIER	PAWR	ENSOARG00020005665	Transcript	ENSOART00020081361.1	protein_coding	-	3/7	-	-	-	-	-	-	-	rs430376224	A	A/C	-	-1	-	HGNC	HGNC:8614	-	-	-	-	-	-	-	-
OAR12_70366176.1	0.00444512	G	A	0.4888	G	A	0.3741	0.1147	12	65193854	MODIFIER	EDEM3	ENSOARG00020005876	Transcript	ENSOART00020009251.2	protein_coding	-	8/20	-	-	-	-	-	-	-	rs405717886	G	G/A	-	-1	-	HGNC	HGNC:16787	-	-	-	-	-	-	-	-
OAR12_70366176.1	0.00444512	G	A	0.4888	G	A	0.3741	0.1147	12	65193854	MODIFIER	EDEM3	ENSOARG00020005876	Transcript	ENSOART00020009358.2	protein_coding	-	8/20	-	-	-	-	-	-	-	rs405717886	G	G/A	-	-1	-	HGNC	HGNC:16787	-	-	-	-	-	-	-	-
OAR12_70366176.1	0.00444512	G	A	0.4888	G	A	0.3741	0.1147	12	65193854	MODIFIER	EDEM3	ENSOARG00020005876	Transcript	ENSOART00020009483.2	protein_coding	-	10/22	-	-	-	-	-	-	-	rs405717886	G	G/A	-	-1	-	HGNC	HGNC:16787	-	-	-	-	-	-	-	-
OAR12_70366176.1	0.00444512	G	A	0.4888	G	A	0.3741	0.1147	12	65193854	MODIFIER	EDEM3	ENSOARG00020005876	Transcript	ENSOART00020060447.1	protein_coding	-	7/18	-	-	-	-	-	-	-	rs405717886	G	G/A	-	-1	-	HGNC	HGNC:16787	-	-	-	-	-	-	-	-
OAR12_70366176.1	0.00444512	G	A	0.4888	G	A	0.3741	0.1147	12	65193854	MODIFIER	EDEM3	ENSOARG00020005876	Transcript	ENSOART00020078655.1	protein_coding	-	8/19	-	-	-	-	-	-	-	rs405717886	G	G/A	-	-1	-	HGNC	HGNC:16787	-	-	-	-	-	-	-	-
s30645.1	0.00445747	G	A	0.3764	G	A	0.2727	0.1037	16	20414696	MODIFIER	PDE4D	ENSOARG00020007357	Transcript	ENSOART00020012677.2	protein_coding	-	5/14	-	-	-	-	-	-	-	-	G	G/A	-	1	-	HGNC	HGNC:8783	-	-	-	-	-	-	-	-
s30645.1	0.00445747	G	A	0.3764	G	A	0.2727	0.1037	16	20414696	MODIFIER	PDE4D	ENSOARG00020007357	Transcript	ENSOART00020012859.2	protein_coding	-	5/14	-	-	-	-	-	-	-	-	G	G/A	-	1	-	HGNC	HGNC:8783	-	-	-	-	-	-	-	-
OAR12_12316455.1	0.00445893	T	C	0.2034	T	C	0.3134	0.11	12	11057227	MODIFIER	-	-	-	-	-	-	-	-	-	-	-	-	-	-	-	T	T/C	-	-	-	-	-	-	-	-	-	-	-	-	-
oar3_OAR12_35295233	0.00450881	T	C	0.3864	T	C	0.2643	0.1221	12	36422112	MODIFIER	-	-	-	-	-	-	-	-	-	-	-	-	-	-	rs419451289	T	T/C	-	-	-	-	-	-	-	-	-	-	-	-	-
Chr20:45917039	0.00453645	A	G	0.2175	A	G	0.3154	0.0979	20	46145915	MODIFIER	-	ENSOARG00020040402	Transcript	ENSOART00020046379.1	lncRNA	-	3/3	-	-	-	-	-	-	-	rs422535492	A	A/G	-	-1	-	-	-	-	-	-	-	-	-	-	-
Chr20:45917039	0.00453645	A	G	0.2175	A	G	0.3154	0.0979	20	46145915	MODIFIER	-	ENSOARG00020040402	Transcript	ENSOART00020076034.1	lncRNA	-	-	-	-	-	-	-	-	-	rs422535492	A	A/G	1428	-1	-	-	-	-	-	-	-	-	-	-	-
oar3_OAR6_90608421	0.00454747	G	T	0.2809	G	T	0.3636	0.0827	6	91695787	MODIFIER	ART3	ENSOARG00020004516	Transcript	ENSOART00020049591.1	protein_coding	-	1/12	-	-	-	-	-	-	-	-	G	G/T	-	1	-	HGNC	HGNC:725	-	-	-	-	-	-	-	-
oar3_OAR6_90608421	0.00454747	G	T	0.2809	G	T	0.3636	0.0827	6	91695787	MODIFIER	ART3	ENSOARG00020004516	Transcript	ENSOART00020067770.1	protein_coding	-	1/13	-	-	-	-	-	-	-	-	G	G/T	-	1	-	HGNC	HGNC:725	-	-	-	-	-	-	-	-
oar3_OAR6_90608421	0.00454747	G	T	0.2809	G	T	0.3636	0.0827	6	91695787	MODIFIER	ART3	ENSOARG00020004516	Transcript	ENSOART00020080329.1	protein_coding	-	1/11	-	-	-	-	-	-	-	-	G	G/T	-	1	-	HGNC	HGNC:725	-	-	-	-	-	-	-	-
oar3_OAR18_2106055	0.0045494	C	T	0.1404	C	T	0.07343	0.06697	18	2402191	MODIFIER	-	-	-	-	-	-	-	-	-	-	-	-	-	-	-	C	C/T	-	-	-	-	-	-	-	-	-	-	-	-	-
oar3_OAR1_162537416	0.00459383	C	T	0.2444	C	T	0.1538	0.0906	1	164995796	MODIFIER	COL8A1	ENSOARG00020000778	Transcript	ENSOART00020001073.2	protein_coding	-	3/4	-	-	-	-	-	-	-	rs420229741	C	C/T	-	1	-	HGNC	HGNC:2215	-	-	-	-	-	-	-	-
oar3_OAR1_162537416	0.00459383	C	T	0.2444	C	T	0.1538	0.0906	1	164995796	MODIFIER	COL8A1	ENSOARG00020000778	Transcript	ENSOART00020045824.1	protein_coding	-	1/2	-	-	-	-	-	-	-	rs420229741	C	C/T	-	1	-	HGNC	HGNC:2215	-	-	-	-	-	-	-	-
oar3_OAR1_162537416	0.00459383	C	T	0.2444	C	T	0.1538	0.0906	1	164995796	MODIFIER	COL8A1	ENSOARG00020000778	Transcript	ENSOART00020071450.1	protein_coding	-	3/5	-	-	-	-	-	-	-	rs420229741	C	C/T	-	1	-	HGNC	HGNC:2215	-	-	-	-	-	-	-	-
oar3_OAR7_24053435	0.00462073	C	T	0.2247	C	T	0.1399	0.0848	7	25179041	MODIFIER	-	ENSOARG00020011071	Transcript	ENSOART00020016864.2	protein_coding	1/2	-	-	-	152	-	-	-	-	-	C	C/T	-	1	-	-	-	-	-	-	-	-	-	-	-
oar3_OAR7_24053435	0.00462073	C	T	0.2247	C	T	0.1399	0.0848	7	25179041	MODIFIER	-	ENSOARG00020011071	Transcript	ENSOART00020053393.1	protein_coding	-	2/2	-	-	-	-	-	-	-	-	C	C/T	-	1	-	-	-	-	-	-	-	-	-	-	-
oar3_OAR2_138930773	0.00462755	G	A	0.382	G	A	0.486	0.104	2	140059397	MODIFIER	-	-	-	-	-	-	-	-	-	-	-	-	-	-	rs422777946	G	G/A	-	-	-	-	-	-	-	-	-	-	-	-	-
OAR13_26253356.1	0.00464427	G	A	0.2781	G	A	0.1853	0.0928	13	24041147	MODIFIER	-	ENSOARG00020029517	Transcript	ENSOART00020057770.1	lncRNA	-	-	-	-	-	-	-	-	-	rs398400712	G	G/A	1896	1	-	-	-	-	-	-	-	-	-	-	-
oar3_OAR20_49240001	0.0046839	C	T	0.4466	C	T	0.3322	0.1144	20	49442606	MODIFIER	-	-	-	-	-	-	-	-	-	-	-	-	-	-	rs419194893	C	C/T	-	-	-	-	-	-	-	-	-	-	-	-	-
s56279.1	0.00472894	C	T	0.4354	T	C	0.472	0.0926	21	28129737	MODIFIER	-	-	-	-	-	-	-	-	-	-	-	-	-	-	-	C	C/T	-	-	-	-	-	-	-	-	-	-	-	-	-
OAR7_19284823.1	0.0047352	C	T	0.3146	C	T	0.2273	0.0873	7	18723056	MODIFIER	MYO9A	ENSOARG00020003056	Transcript	ENSOART00020004719.2	protein_coding	-	27/42	-	-	-	-	-	-	-	-	C	C/T	-	-1	-	HGNC	HGNC:7608	-	-	-	-	-	-	-	-
OAR7_19284823.1	0.0047352	C	T	0.3146	C	T	0.2273	0.0873	7	18723056	MODIFIER	MYO9A	ENSOARG00020003056	Transcript	ENSOART00020004834.2	protein_coding	-	26/42	-	-	-	-	-	-	-	-	C	C/T	-	-1	-	HGNC	HGNC:7608	-	-	-	-	-	-	-	-
OAR7_19284823.1	0.0047352	C	T	0.3146	C	T	0.2273	0.0873	7	18723056	MODIFIER	MYO9A	ENSOARG00020003056	Transcript	ENSOART00020005027.2	protein_coding	-	26/42	-	-	-	-	-	-	-	-	C	C/T	-	-1	-	HGNC	HGNC:7608	-	-	-	-	-	-	-	-
OAR7_19284823.1	0.0047352	C	T	0.3146	C	T	0.2273	0.0873	7	18723056	MODIFIER	MYO9A	ENSOARG00020003056	Transcript	ENSOART00020057215.1	protein_coding	-	26/41	-	-	-	-	-	-	-	-	C	C/T	-	-1	-	HGNC	HGNC:7608	-	-	-	-	-	-	-	-
OAR7_19284823.1	0.0047352	C	T	0.3146	C	T	0.2273	0.0873	7	18723056	MODIFIER	MYO9A	ENSOARG00020003056	Transcript	ENSOART00020080803.1	protein_coding	-	27/43	-	-	-	-	-	-	-	-	C	C/T	-	-1	-	HGNC	HGNC:7608	-	-	-	-	-	-	-	-
OAR3_84735865.1	0.00477878	A	G	0.4129	A	G	0.2727	0.1402	3	80214232	MODIFIER	-	-	-	-	-	-	-	-	-	-	-	-	-	-	rs430770507	A	A/G	-	-	-	-	-	-	-	-	-	-	-	-	-
oar3_OAR3_55295282	0.00478674	T	G	0.4129	G	T	0.4965	0.0906	3	55488294	MODIFIER	-	-	-	-	-	-	-	-	-	-	-	-	-	-	rs425631551	T	T/G	-	-	-	-	-	-	-	-	-	-	-	-	-
OAR5_54040603.1	0.0048085	A	G	0.2895	A	G	0.1986	0.0909	5	50054068	MODIFIER	SLC25A2	ENSOARG00020015575	Transcript	ENSOART00020023822.2	protein_coding	-	-	-	-	-	-	-	-	-	rs413569092	A	A/G	3337	-1	-	HGNC	HGNC:22921	-	-	-	-	-	-	-	-
OAR5_54040603.1	0.0048085	A	G	0.2895	A	G	0.1986	0.0909	5	50054068	MODIFIER	TAF7	ENSOARG00020015603	Transcript	ENSOART00020023858.2	protein_coding	-	-	-	-	-	-	-	-	-	rs413569092	A	A/G	879	-1	-	Uniprot_gn	-	-	-	-	-	-	-	-	-
OAR5_54040603.1	0.0048085	A	G	0.2895	A	G	0.1986	0.0909	5	50054068	MODIFIER	TAF7	ENSOARG00020015603	Transcript	ENSOART00020080324.1	protein_coding	-	-	-	-	-	-	-	-	-	rs413569092	A	A/G	485	-1	-	Uniprot_gn	-	-	-	-	-	-	-	-	-
OAR6_102254026.1	0.00484372	G	A	0.486	A	G	0.3811	0.1329	6	94329697	MODIFIER	BMP2K	ENSOARG00020007544	Transcript	ENSOART00020012028.2	protein_coding	-	9/14	-	-	-	-	-	-	-	rs423049914	G	G/A	-	1	-	HGNC	HGNC:18041	-	-	-	-	-	-	-	-
OAR6_102254026.1	0.00484372	G	A	0.486	A	G	0.3811	0.1329	6	94329697	MODIFIER	BMP2K	ENSOARG00020007544	Transcript	ENSOART00020012147.2	protein_coding	-	9/15	-	-	-	-	-	-	-	rs423049914	G	G/A	-	1	-	HGNC	HGNC:18041	-	-	-	-	-	-	-	-
oar3_OAR1_274855315	0.00484565	T	G	0.4326	T	G	0.3357	0.0969	1	277786288	MODIFIER	KCNH8	ENSOARG00020022125	Transcript	ENSOART00020034561.2	protein_coding	-	12/15	-	-	-	-	-	-	-	rs402084798	T	T/G	-	1	-	HGNC	HGNC:18864	-	-	-	-	-	-	-	-
s35713.1	0.00488358	T	C	0.4719	T	C	0.3706	0.1013	3	51518835	MODIFIER	CTNNA2	ENSOARG00020002405	Transcript	ENSOART00020003754.2	protein_coding	-	7/18	-	-	-	-	-	-	-	-	T	T/C	-	1	-	HGNC	HGNC:2510	-	-	-	-	-	-	-	-
s35713.1	0.00488358	T	C	0.4719	T	C	0.3706	0.1013	3	51518835	MODIFIER	CTNNA2	ENSOARG00020002405	Transcript	ENSOART00020003758.2	protein_coding	-	7/17	-	-	-	-	-	-	-	-	T	T/C	-	1	-	HGNC	HGNC:2510	-	-	-	-	-	-	-	-
s35713.1	0.00488358	T	C	0.4719	T	C	0.3706	0.1013	3	51518835	MODIFIER	CTNNA2	ENSOARG00020002405	Transcript	ENSOART00020003769.2	protein_coding	-	7/16	-	-	-	-	-	-	-	-	T	T/C	-	1	-	HGNC	HGNC:2510	-	-	-	-	-	-	-	-
s35713.1	0.00488358	T	C	0.4719	T	C	0.3706	0.1013	3	51518835	MODIFIER	CTNNA2	ENSOARG00020002405	Transcript	ENSOART00020003790.2	protein_coding	-	7/18	-	-	-	-	-	-	-	-	T	T/C	-	1	-	HGNC	HGNC:2510	-	-	-	-	-	-	-	-
s35713.1	0.00488358	T	C	0.4719	T	C	0.3706	0.1013	3	51518835	MODIFIER	CTNNA2	ENSOARG00020002405	Transcript	ENSOART00020003800.2	protein_coding	-	7/19	-	-	-	-	-	-	-	-	T	T/C	-	1	-	HGNC	HGNC:2510	-	-	-	-	-	-	-	-
s35713.1	0.00488358	T	C	0.4719	T	C	0.3706	0.1013	3	51518835	MODIFIER	CTNNA2	ENSOARG00020002405	Transcript	ENSOART00020003831.2	protein_coding	-	6/17	-	-	-	-	-	-	-	-	T	T/C	-	1	-	HGNC	HGNC:2510	-	-	-	-	-	-	-	-
OAR26_38251830.1	0.00490016	C	T	0.4242	C	T	0.3007	0.1235	26	34393289	MODIFIER	IDO1	ENSOARG00020024595	Transcript	ENSOART00020038664.2	protein_coding	-	8/9	-	-	-	-	-	-	-	-	C	C/T	-	1	-	HGNC	HGNC:6059	-	-	-	-	-	-	-	-
s36703.1	0.00494514	C	A	0.25	C	A	0.1573	0.0927	3	37787084	MODIFIER	GALNT14	ENSOARG00020005530	Transcript	ENSOART00020008473.2	protein_coding	-	2/15	-	-	-	-	-	-	-	-	C	C/A	-	-1	-	HGNC	HGNC:22946	-	-	-	-	-	-	-	-
s36703.1	0.00494514	C	A	0.25	C	A	0.1573	0.0927	3	37787084	MODIFIER	GALNT14	ENSOARG00020005530	Transcript	ENSOART00020008532.2	protein_coding	-	2/14	-	-	-	-	-	-	-	-	C	C/A	-	-1	-	HGNC	HGNC:22946	-	-	-	-	-	-	-	-
s36703.1	0.00494514	C	A	0.25	C	A	0.1573	0.0927	3	37787084	MODIFIER	GALNT14	ENSOARG00020005530	Transcript	ENSOART00020059846.1	protein_coding	-	2/14	-	-	-	-	-	-	-	-	C	C/A	-	-1	-	HGNC	HGNC:22946	-	-	-	-	-	-	-	-
oar3_OAR25_9155922	0.00496061	T	C	0.2612	T	C	0.3706	0.1094	25	8481299	MODIFIER	EDARADD	ENSOARG00020036704	Transcript	ENSOART00020028505.2	protein_coding	-	4/5	-	-	-	-	-	-	-	-	T	T/C	-	1	-	Uniprot_gn	-	-	-	-	-	-	-	-	-
oar3_OAR25_9155922	0.00496061	T	C	0.2612	T	C	0.3706	0.1094	25	8481299	MODIFIER	EDARADD	ENSOARG00020036704	Transcript	ENSOART00020054571.1	protein_coding	-	5/6	-	-	-	-	-	-	-	-	T	T/C	-	1	-	Uniprot_gn	-	-	-	-	-	-	-	-	-
oar3_OAR25_9155922	0.00496061	T	C	0.2612	T	C	0.3706	0.1094	25	8481299	MODIFIER	EDARADD	ENSOARG00020036704	Transcript	ENSOART00020060361.1	protein_coding	-	4/5	-	-	-	-	-	-	-	-	T	T/C	-	1	-	Uniprot_gn	-	-	-	-	-	-	-	-	-
oar3_OAR25_9155922	0.00496061	T	C	0.2612	T	C	0.3706	0.1094	25	8481299	MODIFIER	EDARADD	ENSOARG00020036704	Transcript	ENSOART00020064426.1	protein_coding	-	4/5	-	-	-	-	-	-	-	-	T	T/C	-	1	-	Uniprot_gn	-	-	-	-	-	-	-	-	-
s45689.1	0.00498349	A	G	0.177	A	G	0.1189	0.0581	9	49994188	LOW	STAU2	ENSOARG00020013038	Transcript	ENSOART00020019993.2	protein_coding	2/10	-	-	-	266	201	67	V	gtT/gtC	-	A	A/G	-	-1	-	Uniprot_gn	-	-	-	-	-	-	-	-	-
s45689.1	0.00498349	A	G	0.177	A	G	0.1189	0.0581	9	49994188	LOW	STAU2	ENSOARG00020013038	Transcript	ENSOART00020020203.2	protein_coding	6/17	-	-	-	586	318	106	V	gtT/gtC	-	A	A/G	-	-1	-	Uniprot_gn	-	-	-	-	-	-	-	-	-
s45689.1	0.00498349	A	G	0.177	A	G	0.1189	0.0581	9	49994188	LOW	STAU2	ENSOARG00020013038	Transcript	ENSOART00020020635.2	protein_coding	3/11	-	-	-	350	165	55	V	gtT/gtC	-	A	A/G	-	-1	-	Uniprot_gn	-	-	-	-	-	-	-	-	-
s45689.1	0.00498349	A	G	0.177	A	G	0.1189	0.0581	9	49994188	LOW	STAU2	ENSOARG00020013038	Transcript	ENSOART00020020763.2	protein_coding	6/16	-	-	-	584	318	106	V	gtT/gtC	-	A	A/G	-	-1	-	Uniprot_gn	-	-	-	-	-	-	-	-	-
s45689.1	0.00498349	A	G	0.177	A	G	0.1189	0.0581	9	49994188	LOW	STAU2	ENSOARG00020013038	Transcript	ENSOART00020020904.2	protein_coding	6/16	-	-	-	586	318	106	V	gtT/gtC	-	A	A/G	-	-1	-	Uniprot_gn	-	-	-	-	-	-	-	-	-
s45689.1	0.00498349	A	G	0.177	A	G	0.1189	0.0581	9	49994188	LOW	STAU2	ENSOARG00020013038	Transcript	ENSOART00020021048.2	protein_coding	4/12	-	-	-	463	261	87	V	gtT/gtC	-	A	A/G	-	-1	-	Uniprot_gn	-	-	-	-	-	-	-	-	-
s45455.1	0.00499044	T	G	0.1051	T	G	0.1748	0.0697	3	8394995	MODIFIER	ENG	ENSOARG00020015832	Transcript	ENSOART00020024280.2	protein_coding	-	-	-	-	-	-	-	-	-	-	T	T/G	1726	1	-	HGNC	HGNC:3349	-	-	-	-	-	-	-	-
s45455.1	0.00499044	T	G	0.1051	T	G	0.1748	0.0697	3	8394995	MODIFIER	FPGS	ENSOARG00020015960	Transcript	ENSOART00020024459.2	protein_coding	-	14/14	-	-	-	-	-	-	-	-	T	T/G	-	-1	-	HGNC	HGNC:3824	-	-	-	-	-	-	-	-
s45455.1	0.00499044	T	G	0.1051	T	G	0.1748	0.0697	3	8394995	MODIFIER	FPGS	ENSOARG00020015960	Transcript	ENSOART00020024511.2	protein_coding	-	13/13	-	-	-	-	-	-	-	-	T	T/G	-	-1	-	HGNC	HGNC:3824	-	-	-	-	-	-	-	-
s45455.1	0.00499044	T	G	0.1051	T	G	0.1748	0.0697	3	8394995	MODIFIER	FPGS	ENSOARG00020015960	Transcript	ENSOART00020057387.1	protein_coding	-	14/14	-	-	-	-	-	-	-	-	T	T/G	-	-1	-	HGNC	HGNC:3824	-	-	-	-	-	-	-	-
s21515.1	0.00504044	G	A	0.4831	G	A	0.3671	0.116	19	54675417	MODIFIER	-	ENSOARG00020035074	Transcript	ENSOART00020042899.1	lncRNA	-	1/1	-	-	-	-	-	-	-	rs399027531	G	G/A	-	-1	-	-	-	-	-	-	-	-	-	-	-
s30197.1	0.00504439	T	C	0.2051	T	C	0.3007	0.0956	9	17166454	MODIFIER	COL22A1	ENSOARG00020005316	Transcript	ENSOART00020008189.2	protein_coding	-	38/63	-	-	-	-	-	-	-	rs406369141	T	T/C	-	1	-	HGNC	HGNC:22989	-	-	-	-	-	-	-	-
s40946.1	0.0051306	C	T	0.3287	C	T	0.4371	0.1084	3	35444096	MODIFIER	PLB1	ENSOARG00020004381	Transcript	ENSOART00020007239.2	protein_coding	-	1/58	-	-	-	-	-	-	-	-	C	C/T	-	1	-	HGNC	HGNC:30041	-	-	-	-	-	-	-	-
oar3_OAR18_8668697	0.00516303	T	C	0.1124	T	C	0.1993	0.0869	18	8928861	MODIFIER	-	-	-	-	-	-	-	-	-	-	-	-	-	-	-	T	T/C	-	-	-	-	-	-	-	-	-	-	-	-	-
OAR19_34797716.1	0.00520469	A	G	0.3989	G	A	0.493	0.1081	19	33213976	MODIFIER	-	ENSOARG00020037547	Transcript	ENSOART00020052709.1	protein_coding	-	1/1	-	-	-	-	-	-	-	-	A	A/G	-	-1	-	-	-	-	-	-	-	-	-	-	-
OAR19_34797716.1	0.00520469	A	G	0.3989	G	A	0.493	0.1081	19	33213976	MODIFIER	TAFA1	ENSOARG00020022813	Transcript	ENSOART00020035439.2	protein_coding	-	2/3	-	-	-	-	-	-	-	-	A	A/G	-	-1	-	HGNC	HGNC:21587	-	-	-	-	-	-	-	-
OAR19_34797716.1	0.00520469	A	G	0.3989	G	A	0.493	0.1081	19	33213976	MODIFIER	TAFA1	ENSOARG00020022813	Transcript	ENSOART00020050338.1	protein_coding	-	2/4	-	-	-	-	-	-	-	-	A	A/G	-	-1	-	HGNC	HGNC:21587	-	-	-	-	-	-	-	-
OAR10_34887042.1	0.00520842	A	G	0.3258	A	G	0.4441	0.1183	10	34376947	MODIFIER	-	-	-	-	-	-	-	-	-	-	-	-	-	-	rs418688294	A	A/G	-	-	-	-	-	-	-	-	-	-	-	-	-
OAR8_18770427.1	0.00522391	C	T	0.4073	C	T	0.3077	0.0996	8	17079773	MODIFIER	TBC1D32	ENSOARG00020021648	Transcript	ENSOART00020033490.2	protein_coding	-	-	-	-	-	-	-	-	-	-	C	C/T	393	1	-	HGNC	HGNC:21485	-	-	-	-	-	-	-	-
OAR8_18770427.1	0.00522391	C	T	0.4073	C	T	0.3077	0.0996	8	17079773	MODIFIER	TBC1D32	ENSOARG00020021648	Transcript	ENSOART00020033764.2	protein_coding	-	-	-	-	-	-	-	-	-	-	C	C/T	393	1	-	HGNC	HGNC:21485	-	-	-	-	-	-	-	-
s03928.1	0.00523238	T	C	0.4494	C	T	0.4685	0.0821	13	77600366	MODIFIER	PTGIS	ENSOARG00020010083	Transcript	ENSOART00020015593.2	protein_coding	-	6/10	-	-	-	-	-	-	-	-	T	T/C	-	-1	-	HGNC	HGNC:9603	-	-	-	-	-	-	-	-
s03928.1	0.00523238	T	C	0.4494	C	T	0.4685	0.0821	13	77600366	MODIFIER	PTGIS	ENSOARG00020010083	Transcript	ENSOART00020048488.1	protein_coding	-	6/9	-	-	-	-	-	-	-	-	T	T/C	-	-1	-	HGNC	HGNC:9603	-	-	-	-	-	-	-	-
s03928.1	0.00523238	T	C	0.4494	C	T	0.4685	0.0821	13	77600366	MODIFIER	PTGIS	ENSOARG00020010083	Transcript	ENSOART00020065322.1	protein_coding	-	6/9	-	-	-	-	-	-	-	-	T	T/C	-	-1	-	HGNC	HGNC:9603	-	-	-	-	-	-	-	-
s03928.1	0.00523238	T	C	0.4494	C	T	0.4685	0.0821	13	77600366	MODIFIER	PTGIS	ENSOARG00020010083	Transcript	ENSOART00020077120.1	protein_coding	-	6/9	-	-	-	-	-	-	-	-	T	T/C	-	-1	-	HGNC	HGNC:9603	-	-	-	-	-	-	-	-
s03928.1	0.00523238	T	C	0.4494	C	T	0.4685	0.0821	13	77600366	MODIFIER	PTGIS	ENSOARG00020010083	Transcript	ENSOART00020079274.1	protein_coding	-	6/10	-	-	-	-	-	-	-	-	T	T/C	-	-1	-	HGNC	HGNC:9603	-	-	-	-	-	-	-	-
oar3_OAR8_2898651	0.00524167	T	C	0.4494	T	C	0.3112	0.1382	8	2996320	MODIFIER	-	-	-	-	-	-	-	-	-	-	-	-	-	-	-	T	T/C	-	-	-	-	-	-	-	-	-	-	-	-	-
oar3_OAR3_48504736	0.00525168	T	C	0.3929	T	C	0.2914	0.1015	3	48636302	MODIFIER	-	-	-	-	-	-	-	-	-	-	-	-	-	-	rs428319521	T	T/C	-	-	-	-	-	-	-	-	-	-	-	-	-
oar3_OAR1_241322898	0.00526776	C	A	0.3171	C	A	0.4261	0.109	1	243867894	MODIFIER	-	-	-	-	-	-	-	-	-	-	-	-	-	-	-	C	C/A	-	-	-	-	-	-	-	-	-	-	-	-	-
s36241.1	0.00528378	G	A	0.1178	G	A	0.2077	0.0899	3	176208206	MODIFIER	ABTB3	ENSOARG00020017758	Transcript	ENSOART00020028601.2	protein_coding	-	1/16	-	-	-	-	-	-	-	-	G	G/A	-	1	-	HGNC	HGNC:23844	-	-	-	-	-	-	-	-
s36241.1	0.00528378	G	A	0.1178	G	A	0.2077	0.0899	3	176208206	MODIFIER	ABTB3	ENSOARG00020017758	Transcript	ENSOART00020028733.2	protein_coding	-	1/15	-	-	-	-	-	-	-	-	G	G/A	-	1	-	HGNC	HGNC:23844	-	-	-	-	-	-	-	-
oar3_OAR8_16800753	0.00529428	T	G	0.3705	T	G	0.2744	0.0961	8	16997910	MODIFIER	-	-	-	-	-	-	-	-	-	-	-	-	-	-	-	T	T/G	-	-	-	-	-	-	-	-	-	-	-	-	-
oar3_OAR19_47248877	0.00530653	T	C	0.2949	T	C	0.1888	0.1061	19	47358380	MODIFIER	CACNA1D	ENSOARG00020021987	Transcript	ENSOART00020036432.2	protein_coding	-	9/47	-	-	-	-	-	-	-	rs414072669	T	T/C	-	-1	-	HGNC	HGNC:1391	-	-	-	-	-	-	-	-
oar3_OAR19_47248877	0.00530653	T	C	0.2949	T	C	0.1888	0.1061	19	47358380	MODIFIER	CACNA1D	ENSOARG00020021987	Transcript	ENSOART00020036890.2	protein_coding	-	9/45	-	-	-	-	-	-	-	rs414072669	T	T/C	-	-1	-	HGNC	HGNC:1391	-	-	-	-	-	-	-	-
oar3_OAR19_47248877	0.00530653	T	C	0.2949	T	C	0.1888	0.1061	19	47358380	MODIFIER	CACNA1D	ENSOARG00020021987	Transcript	ENSOART00020036951.2	protein_coding	-	9/40	-	-	-	-	-	-	-	rs414072669	T	T/C	-	-1	-	HGNC	HGNC:1391	-	-	-	-	-	-	-	-
oar3_OAR16_71257420	0.00534367	G	A	0.4663	G	A	0.3706	0.0957	16	70823440	MODIFIER	-	-	-	-	-	-	-	-	-	-	-	-	-	-	-	G	G/A	-	-	-	-	-	-	-	-	-	-	-	-	-
OAR3_184536612.1	0.00535163	T	G	0.4916	G	T	0.3741	0.1343	3	172453919	MODIFIER	-	-	-	-	-	-	-	-	-	-	-	-	-	-	rs403489178	T	T/G	-	-	-	-	-	-	-	-	-	-	-	-	-
s72460.1	0.00536737	A	G	0.3539	A	G	0.2378	0.1161	2	127341084	MODIFIER	PDE1A	ENSOARG00020017541	Transcript	ENSOART00020027391.2	protein_coding	-	2/15	-	-	-	-	-	-	-	-	A	A/G	-	1	-	HGNC	HGNC:8774	-	-	-	-	-	-	-	-
s72460.1	0.00536737	A	G	0.3539	A	G	0.2378	0.1161	2	127341084	MODIFIER	PDE1A	ENSOARG00020017541	Transcript	ENSOART00020027464.2	protein_coding	-	2/15	-	-	-	-	-	-	-	-	A	A/G	-	1	-	HGNC	HGNC:8774	-	-	-	-	-	-	-	-
DU260081_579.1	0.00539764	T	C	0.2865	T	C	0.1783	0.1082	3	109180725	MODIFIER	-	-	-	-	-	-	-	-	-	-	-	-	-	-	-	T	T/C	-	-	-	-	-	-	-	-	-	-	-	-	-
OAR16_48760523.1	0.00541964	C	T	0.2401	C	T	0.1748	0.0653	16	45036808	MODIFIER	-	-	-	-	-	-	-	-	-	-	-	-	-	-	-	C	C/T	-	-	-	-	-	-	-	-	-	-	-	-	-
oar3_OAR2_234655353	0.00542725	C	T	0.1798	C	T	0.2832	0.1034	2	235552847	MODIFIER	PTP4A2	ENSOARG00020006704	Transcript	ENSOART00020010405.2	protein_coding	-	2/6	-	-	-	-	-	-	-	-	C	C/T	-	1	-	HGNC	HGNC:9635	-	-	-	-	-	-	-	-
oar3_OAR2_234655353	0.00542725	C	T	0.1798	C	T	0.2832	0.1034	2	235552847	MODIFIER	PTP4A2	ENSOARG00020006704	Transcript	ENSOART00020010446.2	protein_coding	-	2/5	-	-	-	-	-	-	-	-	C	C/T	-	1	-	HGNC	HGNC:9635	-	-	-	-	-	-	-	-
oar3_OAR2_234655353	0.00542725	C	T	0.1798	C	T	0.2832	0.1034	2	235552847	MODIFIER	PTP4A2	ENSOARG00020006704	Transcript	ENSOART00020010487.2	protein_coding	-	2/4	-	-	-	-	-	-	-	-	C	C/T	-	1	-	HGNC	HGNC:9635	-	-	-	-	-	-	-	-
oar3_OAR2_234655353	0.00542725	C	T	0.1798	C	T	0.2832	0.1034	2	235552847	MODIFIER	PTP4A2	ENSOARG00020006704	Transcript	ENSOART00020055019.1	protein_coding	-	-	-	-	-	-	-	-	-	-	C	C/T	4480	1	-	HGNC	HGNC:9635	-	-	-	-	-	-	-	-
oar3_OAR2_234655353	0.00542725	C	T	0.1798	C	T	0.2832	0.1034	2	235552847	MODIFIER	PTP4A2	ENSOARG00020006704	Transcript	ENSOART00020078169.1	protein_coding	-	1/4	-	-	-	-	-	-	-	-	C	C/T	-	1	-	HGNC	HGNC:9635	-	-	-	-	-	-	-	-
oar3_OAR3_49441243	0.00542837	A	G	0.3383	A	G	0.2305	0.1078	3	49560907	MODIFIER	-	ENSOARG00020002295	Transcript	ENSOART00020003495.2	protein_coding	1/1	-	-	-	1231	-	-	-	-	rs428492324	A	A/G	-	1	-	-	-	-	-	-	-	-	-	-	-
OAR5_54107346.1	0.00551651	C	T	0.2949	C	T	0.1958	0.0991	5	50120328	MODIFIER	-	ENSOARG00020015693	Transcript	ENSOART00020025716.2	protein_coding	-	1/3	-	-	-	-	-	-	-	-	C	C/T	-	1	-	-	-	-	-	-	-	-	-	-	-
OAR5_54107346.1	0.00551651	C	T	0.2949	C	T	0.1958	0.0991	5	50120328	MODIFIER	-	ENSOARG00020015693	Transcript	ENSOART00020025757.2	protein_coding	-	-	-	-	-	-	-	-	-	-	C	C/T	828	1	-	-	-	-	-	-	-	-	-	-	-
OAR2_90110357.1	0.00557222	T	C	0.3989	T	C	0.2797	0.1192	2	85387931	MODIFIER	-	-	-	-	-	-	-	-	-	-	-	-	-	-	-	T	T/C	-	-	-	-	-	-	-	-	-	-	-	-	-
oar3_OAR2_51298541	0.00557483	G	A	0.4635	A	G	0.4091	0.1274	2	51608096	MODIFIER	ZCCHC7	ENSOARG00020002296	Transcript	ENSOART00020003496.2	protein_coding	-	2/9	-	-	-	-	-	-	-	rs424887063	G	G/A	-	-1	-	Uniprot_gn	-	-	-	-	-	-	-	-	-
oar3_OAR2_51298541	0.00557483	G	A	0.4635	A	G	0.4091	0.1274	2	51608096	MODIFIER	ZCCHC7	ENSOARG00020002296	Transcript	ENSOART00020076762.1	protein_coding	-	2/8	-	-	-	-	-	-	-	rs424887063	G	G/A	-	-1	-	Uniprot_gn	-	-	-	-	-	-	-	-	-
oar3_OAR1_139100372	0.00558511	C	T	0.3264	C	T	0.4194	0.093	1	141520300	MODIFIER	-	ENSOARG00020038762	Transcript	ENSOART00020043522.1	protein_coding	-	1/1	-	-	-	-	-	-	-	-	C	C/T	-	-1	-	-	-	-	-	-	-	-	-	-	-
oar3_OAR1_139100372	0.00558511	C	T	0.3264	C	T	0.4194	0.093	1	141520300	MODIFIER	-	ENSOARG00020027227	Transcript	ENSOART00020043965.1	protein_coding	-	4/5	-	-	-	-	-	-	-	-	C	C/T	-	-1	-	-	-	-	-	-	-	-	-	-	-
oar3_OAR1_139100372	0.00558511	C	T	0.3264	C	T	0.4194	0.093	1	141520300	MODIFIER	-	ENSOARG00020027227	Transcript	ENSOART00020051682.1	protein_coding	-	3/5	-	-	-	-	-	-	-	-	C	C/T	-	-1	-	-	-	-	-	-	-	-	-	-	-
oar3_OAR1_139100372	0.00558511	C	T	0.3264	C	T	0.4194	0.093	1	141520300	MODIFIER	-	ENSOARG00020033171	Transcript	ENSOART00020064097.1	protein_coding	-	2/5	-	-	-	-	-	-	-	-	C	C/T	-	-1	-	-	-	-	-	-	-	-	-	-	-
oar3_OAR1_139100372	0.00558511	C	T	0.3264	C	T	0.4194	0.093	1	141520300	MODIFIER	-	ENSOARG00020027227	Transcript	ENSOART00020073200.1	protein_coding	-	5/9	-	-	-	-	-	-	-	-	C	C/T	-	-1	-	-	-	-	-	-	-	-	-	-	-
oar3_OAR1_139100372	0.00558511	C	T	0.3264	C	T	0.4194	0.093	1	141520300	MODIFIER	-	ENSOARG00020033171	Transcript	ENSOART00020075891.1	protein_coding	-	3/5	-	-	-	-	-	-	-	-	C	C/T	-	-1	-	-	-	-	-	-	-	-	-	-	-
OAR1_83667583.1	0.00561778	T	C	0.3371	T	C	0.2203	0.1168	1	79209352	MODIFIER	OLFM3	ENSOARG00020002515	Transcript	ENSOART00020003912.2	protein_coding	-	-	-	-	-	-	-	-	-	-	T	T/C	2908	-1	-	Uniprot_gn	-	-	-	-	-	-	-	-	-
s58847.1	0.00562033	G	A	0.2416	G	A	0.3566	0.115	6	116337151	MODIFIER	HTT	ENSOARG00020020229	Transcript	ENSOART00020032360.2	protein_coding	-	54/66	-	-	-	-	-	-	-	rs402353611	G	G/A	-	-1	-	HGNC	HGNC:4851	-	-	-	-	-	-	-	-
s58847.1	0.00562033	G	A	0.2416	G	A	0.3566	0.115	6	116337151	MODIFIER	HTT	ENSOARG00020020229	Transcript	ENSOART00020053822.1	protein_coding	-	53/65	-	-	-	-	-	-	-	rs402353611	G	G/A	-	-1	-	HGNC	HGNC:4851	-	-	-	-	-	-	-	-
OAR3_12490866.1	0.00563089	C	T	0.3343	C	T	0.2273	0.107	3	11974550	MODIFIER	DENND1A	ENSOARG00020010453	Transcript	ENSOART00020016121.2	protein_coding	-	2/23	-	-	-	-	-	-	-	-	C	C/T	-	1	-	HGNC	HGNC:29324	-	-	-	-	-	-	-	-
OAR3_12490866.1	0.00563089	C	T	0.3343	C	T	0.2273	0.107	3	11974550	MODIFIER	DENND1A	ENSOARG00020010453	Transcript	ENSOART00020016362.2	protein_coding	-	2/22	-	-	-	-	-	-	-	-	C	C/T	-	1	-	HGNC	HGNC:29324	-	-	-	-	-	-	-	-
OAR3_12490866.1	0.00563089	C	T	0.3343	C	T	0.2273	0.107	3	11974550	MODIFIER	DENND1A	ENSOARG00020010453	Transcript	ENSOART00020016845.2	protein_coding	-	2/22	-	-	-	-	-	-	-	-	C	C/T	-	1	-	HGNC	HGNC:29324	-	-	-	-	-	-	-	-
OAR3_12490866.1	0.00563089	C	T	0.3343	C	T	0.2273	0.107	3	11974550	MODIFIER	DENND1A	ENSOARG00020010453	Transcript	ENSOART00020016987.2	protein_coding	-	2/23	-	-	-	-	-	-	-	-	C	C/T	-	1	-	HGNC	HGNC:29324	-	-	-	-	-	-	-	-
OAR3_12490866.1	0.00563089	C	T	0.3343	C	T	0.2273	0.107	3	11974550	MODIFIER	DENND1A	ENSOARG00020010453	Transcript	ENSOART00020017185.2	protein_coding	-	2/22	-	-	-	-	-	-	-	-	C	C/T	-	1	-	HGNC	HGNC:29324	-	-	-	-	-	-	-	-
OAR3_12490866.1	0.00563089	C	T	0.3343	C	T	0.2273	0.107	3	11974550	MODIFIER	DENND1A	ENSOARG00020010453	Transcript	ENSOART00020049681.1	protein_coding	-	-	-	-	-	-	-	-	-	-	C	C/T	4194	1	-	HGNC	HGNC:29324	-	-	-	-	-	-	-	-
OAR3_12490866.1	0.00563089	C	T	0.3343	C	T	0.2273	0.107	3	11974550	MODIFIER	DENND1A	ENSOARG00020010453	Transcript	ENSOART00020055016.1	protein_coding	-	2/5	-	-	-	-	-	-	-	-	C	C/T	-	1	-	HGNC	HGNC:29324	-	-	-	-	-	-	-	-
OAR3_12490866.1	0.00563089	C	T	0.3343	C	T	0.2273	0.107	3	11974550	MODIFIER	DENND1A	ENSOARG00020010453	Transcript	ENSOART00020071950.1	protein_coding	-	2/5	-	-	-	-	-	-	-	-	C	C/T	-	1	-	HGNC	HGNC:29324	-	-	-	-	-	-	-	-
OAR3_12490866.1	0.00563089	C	T	0.3343	C	T	0.2273	0.107	3	11974550	MODIFIER	DENND1A	ENSOARG00020010453	Transcript	ENSOART00020080112.1	protein_coding	-	2/5	-	-	-	-	-	-	-	-	C	C/T	-	1	-	HGNC	HGNC:29324	-	-	-	-	-	-	-	-
s69797.1	0.00566017	G	A	0.3699	G	A	0.2554	0.1145	20	48917508	MODIFIER	-	-	-	-	-	-	-	-	-	-	-	-	-	-	rs401116920	G	G/A	-	-	-	-	-	-	-	-	-	-	-	-	-
OAR8_17146691.1	0.00567391	C	T	0.452	T	C	0.4301	0.1179	8	15606576	MODIFIER	-	-	-	-	-	-	-	-	-	-	-	-	-	-	-	C	C/T	-	-	-	-	-	-	-	-	-	-	-	-	-
oar3_OAR1_89478014	0.0056946	A	C	0.4719	C	A	0.3881	0.14	1	90352704	MODIFIER	-	ENSOARG00020037483	Transcript	ENSOART00020048974.1	lncRNA	-	-	-	-	-	-	-	-	-	-	A	A/C	3671	-1	-	-	-	-	-	-	-	-	-	-	-
oar3_OAR1_89478014	0.0056946	A	C	0.4719	C	A	0.3881	0.14	1	90352704	MODIFIER	-	ENSOARG00020037483	Transcript	ENSOART00020057471.1	lncRNA	-	-	-	-	-	-	-	-	-	-	A	A/C	1319	-1	-	-	-	-	-	-	-	-	-	-	-
oar3_OAR1_89478014	0.0056946	A	C	0.4719	C	A	0.3881	0.14	1	90352704	MODIFIER	-	ENSOARG00020037483	Transcript	ENSOART00020059113.1	lncRNA	-	-	-	-	-	-	-	-	-	-	A	A/C	1856	-1	-	-	-	-	-	-	-	-	-	-	-
oar3_OAR1_89478014	0.0056946	A	C	0.4719	C	A	0.3881	0.14	1	90352704	MODIFIER	-	ENSOARG00020037483	Transcript	ENSOART00020065436.1	lncRNA	-	-	-	-	-	-	-	-	-	-	A	A/C	331	-1	-	-	-	-	-	-	-	-	-	-	-
OAR11_65501963_X.1	0.00571633	C	A	0.4114	A	C	0.4716	0.117	11	61027235	MODIFIER	ARSG	ENSOARG00020011267	Transcript	ENSOART00020017186.2	protein_coding	-	1/12	-	-	-	-	-	-	-	-	C	C/A	-	-1	-	HGNC	HGNC:24102	-	-	-	-	-	-	-	-
oar3_OAR17_842919	0.0057737	G	T	0.323	G	T	0.2063	0.1167	17	1183930	MODIFIER	-	-	-	-	-	-	-	-	-	-	-	-	-	-	-	G	G/T	-	-	-	-	-	-	-	-	-	-	-	-	-
OAR16_22501159.1	0.00586149	T	C	0.4017	T	C	0.3007	0.101	16	20653958	MODIFIER	RAB3C	ENSOARG00020008775	Transcript	ENSOART00020013532.2	protein_coding	-	4/4	-	-	-	-	-	-	-	-	T	T/C	-	-1	-	Uniprot_gn	-	-	-	-	-	-	-	-	-
OAR16_22501159.1	0.00586149	T	C	0.4017	T	C	0.3007	0.101	16	20653958	MODIFIER	RAB3C	ENSOARG00020008775	Transcript	ENSOART00020048135.1	protein_coding	-	4/4	-	-	-	-	-	-	-	-	T	T/C	-	-1	-	Uniprot_gn	-	-	-	-	-	-	-	-	-
OAR3_39417289.1	0.00592947	T	C	0.4494	C	T	0.4296	0.121	3	36829904	MODIFIER	-	ENSOARG00020038781	Transcript	ENSOART00020079768.1	protein_coding	-	1/2	-	-	-	-	-	-	-	rs425571835	T	T/C	-	-1	-	-	-	-	-	-	-	-	-	-	-
oar3_OAR15_21613276	0.00595643	G	A	0.3511	G	A	0.465	0.1139	15	21868977	MODIFIER	ALG9	ENSOARG00020017067	Transcript	ENSOART00020026359.2	protein_coding	-	8/15	-	-	-	-	-	-	-	-	G	G/A	-	-1	-	HGNC	HGNC:15672	-	-	-	-	-	-	-	-
oar3_OAR15_21613276	0.00595643	G	A	0.3511	G	A	0.465	0.1139	15	21868977	MODIFIER	ALG9	ENSOARG00020017067	Transcript	ENSOART00020026549.2	protein_coding	-	8/15	-	-	-	-	-	-	-	-	G	G/A	-	-1	-	HGNC	HGNC:15672	-	-	-	-	-	-	-	-
s28843.1	0.00595643	G	A	0.3511	G	A	0.465	0.1139	15	21870827	MODIFIER	ALG9	ENSOARG00020017067	Transcript	ENSOART00020026359.2	protein_coding	-	8/15	-	-	-	-	-	-	-	-	G	G/A	-	-1	-	HGNC	HGNC:15672	-	-	-	-	-	-	-	-
s28843.1	0.00595643	G	A	0.3511	G	A	0.465	0.1139	15	21870827	MODIFIER	ALG9	ENSOARG00020017067	Transcript	ENSOART00020026549.2	protein_coding	-	8/15	-	-	-	-	-	-	-	-	G	G/A	-	-1	-	HGNC	HGNC:15672	-	-	-	-	-	-	-	-
OAR5_30995937.1	0.00598491	C	T	0.4916	T	C	0.4021	0.1063	5	28173631	MODIFIER	-	-	-	-	-	-	-	-	-	-	-	-	-	-	-	C	C/T	-	-	-	-	-	-	-	-	-	-	-	-	-
OAR12_65650955.1	0.00599956	C	T	0.4438	T	C	0.4615	0.0947	12	60515469	MODIFIER	TOR1AIP1	ENSOARG00020022855	Transcript	ENSOART00020035522.2	protein_coding	-	8/11	-	-	-	-	-	-	-	rs410913618	C	C/T	-	1	-	HGNC	HGNC:29456	-	-	-	-	-	-	-	-
OAR12_65650955.1	0.00599956	C	T	0.4438	T	C	0.4615	0.0947	12	60515469	MODIFIER	TOR1AIP1	ENSOARG00020022855	Transcript	ENSOART00020035594.2	protein_coding	-	7/9	-	-	-	-	-	-	-	rs410913618	C	C/T	-	1	-	HGNC	HGNC:29456	-	-	-	-	-	-	-	-
OAR12_65650955.1	0.00599956	C	T	0.4438	T	C	0.4615	0.0947	12	60515469	MODIFIER	TOR1AIP1	ENSOARG00020022855	Transcript	ENSOART00020035652.2	protein_coding	-	7/10	-	-	-	-	-	-	-	rs410913618	C	C/T	-	1	-	HGNC	HGNC:29456	-	-	-	-	-	-	-	-
OAR12_65650955.1	0.00599956	C	T	0.4438	T	C	0.4615	0.0947	12	60515469	MODIFIER	TOR1AIP1	ENSOARG00020022855	Transcript	ENSOART00020035715.2	protein_coding	-	7/10	-	-	-	-	-	-	-	rs410913618	C	C/T	-	1	-	HGNC	HGNC:29456	-	-	-	-	-	-	-	-
OAR5_101363113.1	0.00602049	A	G	0.3708	A	G	0.4755	0.1047	5	93318520	MODIFIER	-	ENSOARG00020028942	Transcript	ENSOART00020058220.1	protein_coding	-	1/1	-	-	-	-	-	-	-	rs425083216	A	A/G	-	1	-	-	-	-	-	-	-	-	-	-	-
OAR5_101363113.1	0.00602049	A	G	0.3708	A	G	0.4755	0.1047	5	93318520	MODIFIER	-	ENSOARG00020028942	Transcript	ENSOART00020064691.1	protein_coding	-	1/1	-	-	-	-	-	-	-	rs425083216	A	A/G	-	1	-	-	-	-	-	-	-	-	-	-	-
s23976.1	0.006027	A	G	0.3511	A	G	0.2273	0.1238	1	238840642	MODIFIER	-	ENSOARG00020030338	Transcript	ENSOART00020060560.1	lncRNA	-	3/4	-	-	-	-	-	-	-	rs403705796	A	A/G	-	1	-	-	-	-	-	-	-	-	-	-	-
s23976.1	0.006027	A	G	0.3511	A	G	0.2273	0.1238	1	238840642	MODIFIER	-	ENSOARG00020030338	Transcript	ENSOART00020081011.1	lncRNA	-	3/3	-	-	-	-	-	-	-	rs403705796	A	A/G	-	1	-	-	-	-	-	-	-	-	-	-	-
OAR6_121490131.1	0.00604112	A	G	0.2401	A	G	0.1573	0.0828	6	108038344	MODIFIER	-	-	-	-	-	-	-	-	-	-	-	-	-	-	-	A	A/G	-	-	-	-	-	-	-	-	-	-	-	-	-
OAR4_94479590.1	0.00611791	C	T	0.1882	C	T	0.0979	0.0903	4	90591332	MODIFIER	-	-	-	-	-	-	-	-	-	-	-	-	-	-	rs418713244	C	C/T	-	-	-	-	-	-	-	-	-	-	-	-	-
oar3_OAR11_59540445	0.00613389	G	A	0.3736	G	A	0.472	0.0984	11	59834399	MODIFIER	KCNJ16	ENSOARG00020029619	Transcript	ENSOART00020042901.1	protein_coding	-	1/2	-	-	-	-	-	-	-	-	G	G/A	-	-1	-	HGNC	HGNC:6262	-	-	-	-	-	-	-	-
oar3_OAR11_59540445	0.00613389	G	A	0.3736	G	A	0.472	0.0984	11	59834399	MODIFIER	KCNJ16	ENSOARG00020029619	Transcript	ENSOART00020046670.1	protein_coding	-	1/1	-	-	-	-	-	-	-	-	G	G/A	-	-1	-	HGNC	HGNC:6262	-	-	-	-	-	-	-	-
oar3_OAR11_59540445	0.00613389	G	A	0.3736	G	A	0.472	0.0984	11	59834399	MODIFIER	KCNJ16	ENSOARG00020029619	Transcript	ENSOART00020050353.1	protein_coding	-	1/2	-	-	-	-	-	-	-	-	G	G/A	-	-1	-	HGNC	HGNC:6262	-	-	-	-	-	-	-	-
oar3_OAR11_59540445	0.00613389	G	A	0.3736	G	A	0.472	0.0984	11	59834399	MODIFIER	KCNJ16	ENSOARG00020029619	Transcript	ENSOART00020060210.1	protein_coding	-	2/4	-	-	-	-	-	-	-	-	G	G/A	-	-1	-	HGNC	HGNC:6262	-	-	-	-	-	-	-	-
oar3_OAR11_59540445	0.00613389	G	A	0.3736	G	A	0.472	0.0984	11	59834399	MODIFIER	KCNJ16	ENSOARG00020029619	Transcript	ENSOART00020067148.1	protein_coding	-	2/2	-	-	-	-	-	-	-	-	G	G/A	-	-1	-	HGNC	HGNC:6262	-	-	-	-	-	-	-	-
oar3_OAR11_59540445	0.00613389	G	A	0.3736	G	A	0.472	0.0984	11	59834399	MODIFIER	KCNJ16	ENSOARG00020029619	Transcript	ENSOART00020073407.1	protein_coding	-	1/2	-	-	-	-	-	-	-	-	G	G/A	-	-1	-	HGNC	HGNC:6262	-	-	-	-	-	-	-	-
oar3_OAR11_59540445	0.00613389	G	A	0.3736	G	A	0.472	0.0984	11	59834399	MODIFIER	KCNJ16	ENSOARG00020029619	Transcript	ENSOART00020080664.1	protein_coding	-	1/3	-	-	-	-	-	-	-	-	G	G/A	-	-1	-	HGNC	HGNC:6262	-	-	-	-	-	-	-	-
oar3_OAR11_59540445	0.00613389	G	A	0.3736	G	A	0.472	0.0984	11	59834399	MODIFIER	KCNJ16	ENSOARG00020029619	Transcript	ENSOART00020081078.1	protein_coding	-	2/2	-	-	-	-	-	-	-	-	G	G/A	-	-1	-	HGNC	HGNC:6262	-	-	-	-	-	-	-	-
s11950.1	0.00615721	A	G	0.1753	A	G	0.2283	0.053	16	70989826	MODIFIER	-	-	-	-	-	-	-	-	-	-	-	-	-	-	-	A	A/G	-	-	-	-	-	-	-	-	-	-	-	-	-
oar3_OAR18_64784139	0.006159	G	A	0.2978	G	A	0.1923	0.1055	18	63721831	MODIFIER	-	-	-	-	-	-	-	-	-	-	-	-	-	-	rs425347160	G	G/A	-	-	-	-	-	-	-	-	-	-	-	-	-
oar3_OAR20_10281871	0.00616496	A	G	0.4972	G	A	0.3979	0.1049	20	10284879	MODIFIER	BRPF3	ENSOARG00020023590	Transcript	ENSOART00020036818.2	protein_coding	-	12/12	-	-	-	-	-	-	-	rs405281649	A	A/G	-	1	-	HGNC	HGNC:14256	-	-	-	-	-	-	-	-
oar3_OAR6_108370303	0.00618406	G	A	0.2247	G	A	0.3531	0.1284	6	109470519	MODIFIER	BOD1L1	ENSOARG00020003558	Transcript	ENSOART00020005502.2	protein_coding	-	8/19	-	-	-	-	-	-	-	rs415723055	G	G/A	-	-1	-	HGNC	HGNC:31792	-	-	-	-	-	-	-	-
oar3_OAR6_108370303	0.00618406	G	A	0.2247	G	A	0.3531	0.1284	6	109470519	MODIFIER	BOD1L1	ENSOARG00020003558	Transcript	ENSOART00020055143.1	protein_coding	-	9/26	-	-	-	-	-	-	-	rs415723055	G	G/A	-	-1	-	HGNC	HGNC:31792	-	-	-	-	-	-	-	-
oar3_OAR6_108370303	0.00618406	G	A	0.2247	G	A	0.3531	0.1284	6	109470519	MODIFIER	BOD1L1	ENSOARG00020003558	Transcript	ENSOART00020065007.1	protein_coding	-	8/25	-	-	-	-	-	-	-	rs415723055	G	G/A	-	-1	-	HGNC	HGNC:31792	-	-	-	-	-	-	-	-
s39805.1	0.00618829	A	C	0.4185	C	A	0.451	0.1305	10	32942493	MODIFIER	USP12	ENSOARG00020012488	Transcript	ENSOART00020019049.2	protein_coding	-	1/8	-	-	-	-	-	-	-	-	A	A/C	-	1	-	HGNC	HGNC:20485	-	-	-	-	-	-	-	-
s39805.1	0.00618829	A	C	0.4185	C	A	0.451	0.1305	10	32942493	MODIFIER	USP12	ENSOARG00020012488	Transcript	ENSOART00020019131.2	protein_coding	-	1/7	-	-	-	-	-	-	-	-	A	A/C	-	1	-	HGNC	HGNC:20485	-	-	-	-	-	-	-	-
s39805.1	0.00618829	A	C	0.4185	C	A	0.451	0.1305	10	32942493	MODIFIER	USP12	ENSOARG00020012488	Transcript	ENSOART00020044801.1	protein_coding	-	2/9	-	-	-	-	-	-	-	-	A	A/C	-	1	-	HGNC	HGNC:20485	-	-	-	-	-	-	-	-
oar3_OAR19_55211043	0.00618935	T	G	0.3006	T	G	0.1958	0.1048	19	55283713	MODIFIER	ATG7	ENSOARG00020025688	Transcript	ENSOART00020040306.2	protein_coding	-	1/16	-	-	-	-	-	-	-	-	T	T/G	-	1	-	HGNC	HGNC:16935	-	-	-	-	-	-	-	-
oar3_OAR19_55211043	0.00618935	T	G	0.3006	T	G	0.1958	0.1048	19	55283713	MODIFIER	ATG7	ENSOARG00020025688	Transcript	ENSOART00020040314.2	protein_coding	-	1/17	-	-	-	-	-	-	-	-	T	T/G	-	1	-	HGNC	HGNC:16935	-	-	-	-	-	-	-	-
oar3_OAR19_55211043	0.00618935	T	G	0.3006	T	G	0.1958	0.1048	19	55283713	MODIFIER	ATG7	ENSOARG00020025688	Transcript	ENSOART00020040319.2	protein_coding	-	1/16	-	-	-	-	-	-	-	-	T	T/G	-	1	-	HGNC	HGNC:16935	-	-	-	-	-	-	-	-
oar3_OAR19_55211043	0.00618935	T	G	0.3006	T	G	0.1958	0.1048	19	55283713	MODIFIER	ATG7	ENSOARG00020025688	Transcript	ENSOART00020052030.1	protein_coding	-	1/1	-	-	-	-	-	-	-	-	T	T/G	-	1	-	HGNC	HGNC:16935	-	-	-	-	-	-	-	-
oar3_OAR19_55211043	0.00618935	T	G	0.3006	T	G	0.1958	0.1048	19	55283713	MODIFIER	ATG7	ENSOARG00020025688	Transcript	ENSOART00020055956.1	protein_coding	-	1/18	-	-	-	-	-	-	-	-	T	T/G	-	1	-	HGNC	HGNC:16935	-	-	-	-	-	-	-	-
oar3_OAR19_55211043	0.00618935	T	G	0.3006	T	G	0.1958	0.1048	19	55283713	MODIFIER	ATG7	ENSOARG00020025688	Transcript	ENSOART00020061636.1	protein_coding	-	2/2	-	-	-	-	-	-	-	-	T	T/G	-	1	-	HGNC	HGNC:16935	-	-	-	-	-	-	-	-
oar3_OAR19_55211043	0.00618935	T	G	0.3006	T	G	0.1958	0.1048	19	55283713	MODIFIER	ATG7	ENSOARG00020025688	Transcript	ENSOART00020074176.1	protein_coding	-	1/17	-	-	-	-	-	-	-	-	T	T/G	-	1	-	HGNC	HGNC:16935	-	-	-	-	-	-	-	-
oar3_OAR19_55211043	0.00618935	T	G	0.3006	T	G	0.1958	0.1048	19	55283713	MODIFIER	ATG7	ENSOARG00020025688	Transcript	ENSOART00020075354.1	protein_coding	-	1/1	-	-	-	-	-	-	-	-	T	T/G	-	1	-	HGNC	HGNC:16935	-	-	-	-	-	-	-	-
oar3_OAR19_55211043	0.00618935	T	G	0.3006	T	G	0.1958	0.1048	19	55283713	MODIFIER	ATG7	ENSOARG00020025688	Transcript	ENSOART00020078554.1	protein_coding	-	1/16	-	-	-	-	-	-	-	-	T	T/G	-	1	-	HGNC	HGNC:16935	-	-	-	-	-	-	-	-
OAR2_102326410.1	0.00620337	G	A	0.2893	G	A	0.3741	0.0848	2	96233087	LOW	IFNK	ENSOARG00020009030	Transcript	ENSOART00020013882.2	protein_coding	1/1	-	-	-	600	600	200	R	agG/agA	rs400764019	G	G/A	-	1	-	HGNC	HGNC:21714	-	-	-	-	-	-	-	-
s02860.1	0.0062037	A	G	0.1573	A	G	0.09091	0.06639	2	74585305	MODIFIER	GLDC	ENSOARG00020009656	Transcript	ENSOART00020015016.2	protein_coding	-	11/24	-	-	-	-	-	-	-	-	A	A/G	-	-1	-	HGNC	HGNC:4313	-	-	-	-	-	-	-	-
s02860.1	0.0062037	A	G	0.1573	A	G	0.09091	0.06639	2	74585305	MODIFIER	GLDC	ENSOARG00020009656	Transcript	ENSOART00020066922.1	protein_coding	-	11/23	-	-	-	-	-	-	-	-	A	A/G	-	-1	-	HGNC	HGNC:4313	-	-	-	-	-	-	-	-
s02860.1	0.0062037	A	G	0.1573	A	G	0.09091	0.06639	2	74585305	MODIFIER	GLDC	ENSOARG00020009656	Transcript	ENSOART00020076825.1	protein_coding	-	10/23	-	-	-	-	-	-	-	-	A	A/G	-	-1	-	HGNC	HGNC:4313	-	-	-	-	-	-	-	-
s65085.1	0.00621483	C	T	0.1067	C	T	0.2071	0.1004	11	34381969	MODIFIER	SREBF1	ENSOARG00020026238	Transcript	ENSOART00020041284.2	protein_coding	-	1/19	-	-	-	-	-	-	-	-	C	C/T	-	1	-	HGNC	HGNC:11289	-	-	-	-	-	-	-	-
s65085.1	0.00621483	C	T	0.1067	C	T	0.2071	0.1004	11	34381969	MODIFIER	TOM1L2	ENSOARG00020026248	Transcript	ENSOART00020041321.2	protein_coding	-	-	-	-	-	-	-	-	-	-	C	C/T	2619	1	-	HGNC	HGNC:11984	-	-	-	-	-	-	-	-
s65085.1	0.00621483	C	T	0.1067	C	T	0.2071	0.1004	11	34381969	MODIFIER	TOM1L2	ENSOARG00020026248	Transcript	ENSOART00020041322.2	protein_coding	-	-	-	-	-	-	-	-	-	-	C	C/T	4241	1	-	HGNC	HGNC:11984	-	-	-	-	-	-	-	-
s65085.1	0.00621483	C	T	0.1067	C	T	0.2071	0.1004	11	34381969	MODIFIER	TOM1L2	ENSOARG00020026248	Transcript	ENSOART00020041323.2	protein_coding	-	-	-	-	-	-	-	-	-	-	C	C/T	4231	1	-	HGNC	HGNC:11984	-	-	-	-	-	-	-	-
s65085.1	0.00621483	C	T	0.1067	C	T	0.2071	0.1004	11	34381969	MODIFIER	TOM1L2	ENSOARG00020026248	Transcript	ENSOART00020041324.2	protein_coding	-	-	-	-	-	-	-	-	-	-	C	C/T	4231	1	-	HGNC	HGNC:11984	-	-	-	-	-	-	-	-
s65085.1	0.00621483	C	T	0.1067	C	T	0.2071	0.1004	11	34381969	MODIFIER	TOM1L2	ENSOARG00020026248	Transcript	ENSOART00020041325.2	protein_coding	-	-	-	-	-	-	-	-	-	-	C	C/T	4231	1	-	HGNC	HGNC:11984	-	-	-	-	-	-	-	-
s65085.1	0.00621483	C	T	0.1067	C	T	0.2071	0.1004	11	34381969	MODIFIER	TOM1L2	ENSOARG00020026248	Transcript	ENSOART00020041326.2	protein_coding	-	-	-	-	-	-	-	-	-	-	C	C/T	4231	1	-	HGNC	HGNC:11984	-	-	-	-	-	-	-	-
s43188.1	0.00621983	T	C	0.4181	T	C	0.3169	0.1012	11	35918024	MODIFIER	EPN3	ENSOARG00020014247	Transcript	ENSOART00020021856.2	protein_coding	-	2/9	-	-	-	-	-	-	-	-	T	T/C	-	-1	-	HGNC	HGNC:18235	-	-	-	-	-	-	-	-
s43188.1	0.00621983	T	C	0.4181	T	C	0.3169	0.1012	11	35918024	MODIFIER	EPN3	ENSOARG00020014247	Transcript	ENSOART00020068884.1	protein_coding	-	2/8	-	-	-	-	-	-	-	-	T	T/C	-	-1	-	HGNC	HGNC:18235	-	-	-	-	-	-	-	-
OAR17_50217767.1	0.00622925	A	G	0.48	A	G	0.365	0.115	17	46560737	MODIFIER	-	ENSOARG00020040186	Transcript	ENSOART00020055433.1	lncRNA	1/2	-	-	-	3442	-	-	-	-	-	A	A/G	-	1	-	-	-	-	-	-	-	-	-	-	-
oar3_OAR5_93037015	0.0062366	A	C	0.392	A	C	0.493	0.101	5	93337632	MODIFIER	-	ENSOARG00020028942	Transcript	ENSOART00020058220.1	protein_coding	-	1/1	-	-	-	-	-	-	-	-	A	A/C	-	1	-	-	-	-	-	-	-	-	-	-	-
oar3_OAR5_93037015	0.0062366	A	C	0.392	A	C	0.493	0.101	5	93337632	MODIFIER	-	ENSOARG00020028942	Transcript	ENSOART00020064691.1	protein_coding	-	1/1	-	-	-	-	-	-	-	-	A	A/C	-	1	-	-	-	-	-	-	-	-	-	-	-
oar3_OAR2_51064827	0.00626619	C	T	0.4579	T	C	0.4161	0.126	2	51375100	MODIFIER	-	ENSOARG00020032029	Transcript	ENSOART00020077834.1	lncRNA	-	-	-	-	-	-	-	-	-	rs417213811	C	C/T	2704	1	-	-	-	-	-	-	-	-	-	-	-
oar3_OAR2_51064827	0.00626619	C	T	0.4579	T	C	0.4161	0.126	2	51375100	MODIFIER	ZCCHC7	ENSOARG00020002296	Transcript	ENSOART00020003496.2	protein_coding	-	-	-	-	-	-	-	-	-	rs417213811	C	C/T	1293	-1	-	Uniprot_gn	-	-	-	-	-	-	-	-	-
oar3_OAR3_199473181	0.00628323	C	T	0.435	C	T	0.3182	0.1168	3	200267202	MODIFIER	-	-	-	-	-	-	-	-	-	-	-	-	-	-	-	C	C/T	-	-	-	-	-	-	-	-	-	-	-	-	-
oar3_OAR3_178857062	0.00631074	G	A	0.429	G	A	0.3043	0.1247	3	179412117	MODIFIER	-	-	-	-	-	-	-	-	-	-	-	-	-	-	-	G	G/A	-	-	-	-	-	-	-	-	-	-	-	-	-
oar3_OAR15_36188332	0.00631925	C	T	0.4326	C	T	0.3357	0.0969	15	36360491	MODIFIER	-	ENSOARG00020031277	Transcript	ENSOART00020052594.1	lncRNA	-	1/1	-	-	-	-	-	-	-	rs423636520	C	C/T	-	1	-	-	-	-	-	-	-	-	-	-	-
oar3_OAR15_36188332	0.00631925	C	T	0.4326	C	T	0.3357	0.0969	15	36360491	MODIFIER	-	ENSOARG00020031277	Transcript	ENSOART00020052621.1	lncRNA	-	1/1	-	-	-	-	-	-	-	rs423636520	C	C/T	-	1	-	-	-	-	-	-	-	-	-	-	-
oar3_OAR15_36188332	0.00631925	C	T	0.4326	C	T	0.3357	0.0969	15	36360491	MODIFIER	-	ENSOARG00020031277	Transcript	ENSOART00020052992.1	lncRNA	-	2/4	-	-	-	-	-	-	-	rs423636520	C	C/T	-	1	-	-	-	-	-	-	-	-	-	-	-
oar3_OAR15_36188332	0.00631925	C	T	0.4326	C	T	0.3357	0.0969	15	36360491	MODIFIER	-	ENSOARG00020031277	Transcript	ENSOART00020064534.1	lncRNA	-	-	-	-	-	-	-	-	-	rs423636520	C	C/T	3632	1	-	-	-	-	-	-	-	-	-	-	-
oar3_OAR15_36188332	0.00631925	C	T	0.4326	C	T	0.3357	0.0969	15	36360491	MODIFIER	-	ENSOARG00020031277	Transcript	ENSOART00020068115.1	lncRNA	-	2/3	-	-	-	-	-	-	-	rs423636520	C	C/T	-	1	-	-	-	-	-	-	-	-	-	-	-
oar3_OAR3_49728167	0.00632626	C	A	0.3652	C	A	0.2937	0.0715	3	49854384	MODIFIER	-	-	-	-	-	-	-	-	-	-	-	-	-	-	-	C	C/A	-	-	-	-	-	-	-	-	-	-	-	-	-
DU408817_431.1	0.0063467	A	G	0.2303	A	G	0.1329	0.0974	3	206341958	MODIFIER	-	ENSOARG00020001656	Transcript	ENSOART00020006478.2	protein_coding	-	6/36	-	-	-	-	-	-	-	rs55628091	A	A/G	-	1	-	-	-	-	-	-	-	-	-	-	-
DU408817_431.1	0.0063467	A	G	0.2303	A	G	0.1329	0.0974	3	206341958	MODIFIER	-	ENSOARG00020001656	Transcript	ENSOART00020007048.2	protein_coding	-	5/35	-	-	-	-	-	-	-	rs55628091	A	A/G	-	1	-	-	-	-	-	-	-	-	-	-	-
OAR17_54697442.1	0.006352	C	T	0.2584	C	T	0.3671	0.1087	17	50687957	MODIFIER	-	-	-	-	-	-	-	-	-	-	-	-	-	-	-	C	C/T	-	-	-	-	-	-	-	-	-	-	-	-	-
OAR21_23906179.1	0.00637853	T	C	0.4045	T	C	0.4965	0.092	21	19471432	MODIFIER	-	-	-	-	-	-	-	-	-	-	-	-	-	-	-	T	T/C	-	-	-	-	-	-	-	-	-	-	-	-	-
oar3_OAR3_35343819	0.00638377	G	A	0.4354	A	G	0.458	0.1066	3	35466218	MODIFIER	PLB1	ENSOARG00020004381	Transcript	ENSOART00020007239.2	protein_coding	-	2/58	-	-	-	-	-	-	-	rs427358331	G	G/A	-	1	-	HGNC	HGNC:30041	-	-	-	-	-	-	-	-
oar3_OAR24_21216056	0.00640191	T	C	0.2191	T	C	0.3217	0.1026	24	21740608	MODIFIER	EARS2	ENSOARG00020024799	Transcript	ENSOART00020038857.2	protein_coding	-	-	-	-	-	-	-	-	-	rs409869855	T	T/C	2107	-1	-	Uniprot_gn	-	-	-	-	-	-	-	-	-
oar3_OAR24_21216056	0.00640191	T	C	0.2191	T	C	0.3217	0.1026	24	21740608	MODIFIER	EARS2	ENSOARG00020024799	Transcript	ENSOART00020044574.1	protein_coding	-	-	-	-	-	-	-	-	-	rs409869855	T	T/C	2107	-1	-	Uniprot_gn	-	-	-	-	-	-	-	-	-
oar3_OAR24_21216056	0.00640191	T	C	0.2191	T	C	0.3217	0.1026	24	21740608	MODIFIER	EARS2	ENSOARG00020024799	Transcript	ENSOART00020068818.1	protein_coding	-	-	-	-	-	-	-	-	-	rs409869855	T	T/C	2107	-1	-	Uniprot_gn	-	-	-	-	-	-	-	-	-
oar3_OAR3_59952087	0.00642851	C	A	0.1073	C	A	0.05245	0.05485	3	60075895	MODIFIER	IL37	ENSOARG00020040136	Transcript	ENSOART00020055649.1	protein_coding	6/6	-	-	-	1633	-	-	-	-	-	C	C/A	-	-1	-	HGNC	HGNC:15563	-	-	-	-	-	-	-	-
s50643.1	0.00643013	A	G	0.177	A	G	0.09441	0.08259	1	132426220	MODIFIER	-	-	-	-	-	-	-	-	-	-	-	-	-	-	-	A	A/G	-	-	-	-	-	-	-	-	-	-	-	-	-
oar3_OAR19_11370515	0.00643762	G	A	0.2275	G	A	0.1364	0.0911	19	11460059	MODIFIER	CTDSPL	ENSOARG00020025807	Transcript	ENSOART00020040543.2	protein_coding	-	8/8	-	-	-	-	-	-	-	-	G	G/A	-	1	-	HGNC	HGNC:16890	-	-	-	-	-	-	-	-
oar3_OAR19_11370515	0.00643762	G	A	0.2275	G	A	0.1364	0.0911	19	11460059	MODIFIER	CTDSPL	ENSOARG00020025807	Transcript	ENSOART00020040545.2	protein_coding	-	-	-	-	-	-	-	-	-	-	G	G/A	191	1	-	HGNC	HGNC:16890	-	-	-	-	-	-	-	-
oar3_OAR19_11370515	0.00643762	G	A	0.2275	G	A	0.1364	0.0911	19	11460059	MODIFIER	CTDSPL	ENSOARG00020025807	Transcript	ENSOART00020043644.1	protein_coding	7/7	-	-	-	1572	-	-	-	-	-	G	G/A	-	1	-	HGNC	HGNC:16890	-	-	-	-	-	-	-	-
oar3_OAR19_11370515	0.00643762	G	A	0.2275	G	A	0.1364	0.0911	19	11460059	MODIFIER	CTDSPL	ENSOARG00020025807	Transcript	ENSOART00020054648.1	protein_coding	8/8	-	-	-	1624	-	-	-	-	-	G	G/A	-	1	-	HGNC	HGNC:16890	-	-	-	-	-	-	-	-
oar3_OAR19_11370515	0.00643762	G	A	0.2275	G	A	0.1364	0.0911	19	11460059	MODIFIER	CTDSPL	ENSOARG00020025807	Transcript	ENSOART00020081012.1	protein_coding	-	-	-	-	-	-	-	-	-	-	G	G/A	181	1	-	HGNC	HGNC:16890	-	-	-	-	-	-	-	-
s70777.1	0.00645403	G	A	0.3567	G	A	0.2448	0.1119	3	79453904	MODIFIER	-	ENSOARG00020029483	Transcript	ENSOART00020048576.1	lncRNA	-	1/3	-	-	-	-	-	-	-	-	G	G/A	-	-1	-	-	-	-	-	-	-	-	-	-	-
s70777.1	0.00645403	G	A	0.3567	G	A	0.2448	0.1119	3	79453904	MODIFIER	-	ENSOARG00020029483	Transcript	ENSOART00020065967.1	lncRNA	-	1/2	-	-	-	-	-	-	-	-	G	G/A	-	-1	-	-	-	-	-	-	-	-	-	-	-
OAR6_60801813.1	0.00652229	C	T	0.4	C	T	0.3094	0.0906	6	55893133	MODIFIER	-	-	-	-	-	-	-	-	-	-	-	-	-	-	-	C	C/T	-	-	-	-	-	-	-	-	-	-	-	-	-
250506CS3900211600001_1041.1	0.00660284	G	T	0.4579	T	G	0.4545	0.0876	16	41613876	MODIFIER	-	ENSOARG00020033598	Transcript	ENSOART00020068013.1	lncRNA	-	-	-	-	-	-	-	-	-	-	G	G/T	1371	1	-	-	-	-	-	-	-	-	-	-	-
250506CS3900211600001_1041.1	0.00660284	G	T	0.4579	T	G	0.4545	0.0876	16	41613876	MODIFIER	GOLPH3	ENSOARG00020010804	Transcript	ENSOART00020016487.2	protein_coding	4/4	-	-	-	1816	-	-	-	-	-	G	G/T	-	1	-	Uniprot_gn	-	-	-	-	-	-	-	-	-
OAR10_32276024.1	0.00663975	C	T	0.2429	C	T	0.3404	0.0975	10	32105461	MODIFIER	FLT1	ENSOARG00020010103	Transcript	ENSOART00020015599.2	protein_coding	-	-	-	-	-	-	-	-	-	rs429610902	C	C/T	3356	1	-	HGNC	HGNC:3763	-	-	-	-	-	-	-	-
OAR10_32276024.1	0.00663975	C	T	0.2429	C	T	0.3404	0.0975	10	32105461	MODIFIER	FLT1	ENSOARG00020010103	Transcript	ENSOART00020061235.1	protein_coding	-	-	-	-	-	-	-	-	-	rs429610902	C	C/T	2355	1	-	HGNC	HGNC:3763	-	-	-	-	-	-	-	-
s65743.1	0.00665954	G	A	0.3736	G	A	0.2902	0.0834	2	107665612	MODIFIER	GALNTL6	ENSOARG00020010374	Transcript	ENSOART00020016041.2	protein_coding	-	11/11	-	-	-	-	-	-	-	rs415901946	G	G/A	-	-1	-	HGNC	HGNC:33844	-	-	-	-	-	-	-	-
s13785.1	0.00671123	A	G	0.1685	A	G	0.09091	0.07759	3	114938360	MODIFIER	SYT1	ENSOARG00020005626	Transcript	ENSOART00020077893.1	protein_coding	-	1/10	-	-	-	-	-	-	-	-	A	A/G	-	1	-	Uniprot_gn	-	-	-	-	-	-	-	-	-
oar3_OAR11_53006583	0.00673913	A	C	0.2416	A	C	0.1503	0.0913	11	53348974	MODERATE	TMC8	ENSOARG00020018447	Transcript	ENSOART00020028377.2	protein_coding	13/17	-	-	-	1602	1403	468	L/R	cTa/cGa	-	A	A/C	-	-1	-	HGNC	HGNC:20474	-	-	-	-	-	-	-	-
oar3_OAR11_53006583	0.00673913	A	C	0.2416	A	C	0.1503	0.0913	11	53348974	MODERATE	TMC8	ENSOARG00020018447	Transcript	ENSOART00020054422.1	protein_coding	12/16	-	-	-	1929	1730	577	L/R	cTa/cGa	-	A	A/C	-	-1	-	HGNC	HGNC:20474	-	-	-	-	-	-	-	-
oar3_OAR8_88860714	0.00674462	T	C	0.1376	T	C	0.2378	0.1002	8	89936370	MODIFIER	-	-	-	-	-	-	-	-	-	-	-	-	-	-	-	T	T/C	-	-	-	-	-	-	-	-	-	-	-	-	-
oar3_OAR12_36980544	0.00678347	T	C	0.3455	T	C	0.458	0.1125	12	38100868	MODIFIER	FMO1	ENSOARG00020010683	Transcript	ENSOART00020016461.2	protein_coding	-	2/8	-	-	-	-	-	-	-	rs424893539	T	T/C	-	1	-	Uniprot_gn	-	-	-	-	-	-	-	-	-
oar3_OAR12_36980544	0.00678347	T	C	0.3455	T	C	0.458	0.1125	12	38100868	MODIFIER	FMO1	ENSOARG00020010683	Transcript	ENSOART00020016525.2	protein_coding	-	1/6	-	-	-	-	-	-	-	rs424893539	T	T/C	-	1	-	Uniprot_gn	-	-	-	-	-	-	-	-	-
oar3_OAR19_52431339	0.00679554	T	C	0.2978	T	C	0.2133	0.0845	19	52510140	MODIFIER	-	ENSOARG00020011968	Transcript	ENSOART00020018285.2	protein_coding	-	-	-	-	-	-	-	-	-	-	T	T/C	1105	-1	-	-	-	-	-	-	-	-	-	-	-
oar3_OAR19_52431339	0.00679554	T	C	0.2978	T	C	0.2133	0.0845	19	52510140	MODIFIER	-	ENSOARG00020011968	Transcript	ENSOART00020046602.1	protein_coding	-	-	-	-	-	-	-	-	-	-	T	T/C	1105	-1	-	-	-	-	-	-	-	-	-	-	-
oar3_OAR19_52431339	0.00679554	T	C	0.2978	T	C	0.2133	0.0845	19	52510140	MODIFIER	SETD2	ENSOARG00020011798	Transcript	ENSOART00020018158.2	protein_coding	-	-	-	-	-	-	-	-	-	-	T	T/C	1344	1	-	HGNC	HGNC:18420	-	-	-	-	-	-	-	-
oar3_OAR19_52431339	0.00679554	T	C	0.2978	T	C	0.2133	0.0845	19	52510140	MODIFIER	SETD2	ENSOARG00020011798	Transcript	ENSOART00020043161.1	protein_coding	-	-	-	-	-	-	-	-	-	-	T	T/C	1338	1	-	HGNC	HGNC:18420	-	-	-	-	-	-	-	-
oar3_OAR19_52431339	0.00679554	T	C	0.2978	T	C	0.2133	0.0845	19	52510140	MODIFIER	SETD2	ENSOARG00020011798	Transcript	ENSOART00020045023.1	protein_coding	-	-	-	-	-	-	-	-	-	-	T	T/C	1338	1	-	HGNC	HGNC:18420	-	-	-	-	-	-	-	-
oar3_OAR19_52431339	0.00679554	T	C	0.2978	T	C	0.2133	0.0845	19	52510140	MODIFIER	SETD2	ENSOARG00020011798	Transcript	ENSOART00020056487.1	protein_coding	-	-	-	-	-	-	-	-	-	-	T	T/C	1338	1	-	HGNC	HGNC:18420	-	-	-	-	-	-	-	-
oar3_OAR13_74996396	0.00681218	C	T	0.4551	C	T	0.3392	0.1159	13	75422771	MODIFIER	-	-	-	-	-	-	-	-	-	-	-	-	-	-	rs420023177	C	C/T	-	-	-	-	-	-	-	-	-	-	-	-	-
s56755.1	0.00681218	T	C	0.4551	T	C	0.3392	0.1159	13	75422513	MODIFIER	-	-	-	-	-	-	-	-	-	-	-	-	-	-	-	T	T/C	-	-	-	-	-	-	-	-	-	-	-	-	-
oar3_OAR9_32493264	0.00681569	C	A	0.3399	C	A	0.2552	0.0847	9	32667556	MODIFIER	-	ENSOARG00020035422	Transcript	ENSOART00020080846.1	lncRNA	-	-	-	-	-	-	-	-	-	rs407090351	C	C/A	3290	-1	-	-	-	-	-	-	-	-	-	-	-
oar3_OAR3_178935942	0.00690452	C	T	0.4438	C	T	0.3042	0.1396	3	179485433	LOW	-	ENSOARG00020020834	Transcript	ENSOART00020032166.2	protein_coding	4/6	-	-	-	830	577	193	L	Ctg/Ttg	rs430269081	C	C/T	-	1	-	-	-	-	-	-	-	-	-	-	-
OAR6_47743142.1	0.00693117	T	C	0.2725	T	C	0.2133	0.0592	6	43513627	MODIFIER	-	-	-	-	-	-	-	-	-	-	-	-	-	-	rs428729446	T	T/C	-	-	-	-	-	-	-	-	-	-	-	-	-
OAR2_54654208.1	0.00694128	T	C	0.4576	C	T	0.4161	0.1263	2	51416622	MODIFIER	ZCCHC7	ENSOARG00020002296	Transcript	ENSOART00020003496.2	protein_coding	-	6/9	-	-	-	-	-	-	-	rs409311977	T	T/C	-	-1	-	Uniprot_gn	-	-	-	-	-	-	-	-	-
OAR2_54654208.1	0.00694128	T	C	0.4576	C	T	0.4161	0.1263	2	51416622	MODIFIER	ZCCHC7	ENSOARG00020002296	Transcript	ENSOART00020076762.1	protein_coding	-	6/8	-	-	-	-	-	-	-	rs409311977	T	T/C	-	-1	-	Uniprot_gn	-	-	-	-	-	-	-	-	-
Chr7:10476202	0.00697279	G	A	0.4298	G	A	0.3497	0.0801	7	10688444	MODERATE	CMYA5	ENSOARG00020003611	Transcript	ENSOART00020006279.2	protein_coding	2/13	-	-	-	2260	2198	733	G/E	gGa/gAa	-	G	G/A	-	1	-	HGNC	HGNC:14305	-	-	-	-	-	-	-	-
Chr7:10476244	0.00697279	T	C	0.4298	T	C	0.3497	0.0801	7	10688486	MODERATE	CMYA5	ENSOARG00020003611	Transcript	ENSOART00020006279.2	protein_coding	2/13	-	-	-	2302	2240	747	L/S	tTg/tCg	-	T	T/C	-	1	-	HGNC	HGNC:14305	-	-	-	-	-	-	-	-
OAR3_193126409.1	0.0069778	C	T	0.4213	C	T	0.3169	0.1044	3	180114485	MODIFIER	-	ENSOARG00020030005	Transcript	ENSOART00020070474.1	protein_coding	-	1/2	-	-	-	-	-	-	-	rs605610975	C	C/T	-	1	-	-	-	-	-	-	-	-	-	-	-
OAR3_193126409.1	0.0069778	C	T	0.4213	C	T	0.3169	0.1044	3	180114485	MODIFIER	-	ENSOARG00020029863	Transcript	ENSOART00020072437.1	protein_coding	-	-	-	-	-	-	-	-	-	rs605610975	C	C/T	3367	-1	-	-	-	-	-	-	-	-	-	-	-
OAR6_35654093.1	0.00697912	T	C	0.4375	C	T	0.4529	0.1096	6	32282238	MODIFIER	GRID2	ENSOARG00020021077	Transcript	ENSOART00020033391.2	protein_coding	-	2/15	-	-	-	-	-	-	-	rs424568748	T	T/C	-	-1	-	HGNC	HGNC:4576	-	-	-	-	-	-	-	-
OAR6_35654093.1	0.00697912	T	C	0.4375	C	T	0.4529	0.1096	6	32282238	MODIFIER	GRID2	ENSOARG00020021077	Transcript	ENSOART00020033656.2	protein_coding	-	2/15	-	-	-	-	-	-	-	rs424568748	T	T/C	-	-1	-	HGNC	HGNC:4576	-	-	-	-	-	-	-	-
OAR6_35654093.1	0.00697912	T	C	0.4375	C	T	0.4529	0.1096	6	32282238	MODIFIER	GRID2	ENSOARG00020021077	Transcript	ENSOART00020033681.2	protein_coding	-	2/14	-	-	-	-	-	-	-	rs424568748	T	T/C	-	-1	-	HGNC	HGNC:4576	-	-	-	-	-	-	-	-
OAR6_101187263.1	0.00699588	A	G	0.4635	A	G	0.3531	0.1104	6	93303802	MODIFIER	-	ENSOARG00020006669	Transcript	ENSOART00020010240.2	protein_coding	-	2/8	-	-	-	-	-	-	-	-	A	A/G	-	1	-	-	-	-	-	-	-	-	-	-	-
OAR6_101187263.1	0.00699588	A	G	0.4635	A	G	0.3531	0.1104	6	93303802	MODIFIER	-	ENSOARG00020006669	Transcript	ENSOART00020063452.1	protein_coding	-	2/8	-	-	-	-	-	-	-	-	A	A/G	-	1	-	-	-	-	-	-	-	-	-	-	-
OAR14_60591309.1	0.00701349	C	T	0.2303	C	T	0.3252	0.0949	14	58407895	MODIFIER	-	ENSOARG00020036689	Transcript	ENSOART00020020321.2	protein_coding	-	1/4	-	-	-	-	-	-	-	-	C	C/T	-	1	-	-	-	-	-	-	-	-	-	-	-
OAR14_60591309.1	0.00701349	C	T	0.2303	C	T	0.3252	0.0949	14	58407895	MODIFIER	-	ENSOARG00020036689	Transcript	ENSOART00020062873.1	protein_coding	-	1/4	-	-	-	-	-	-	-	-	C	C/T	-	1	-	-	-	-	-	-	-	-	-	-	-
OAR14_60591309.1	0.00701349	C	T	0.2303	C	T	0.3252	0.0949	14	58407895	MODIFIER	-	ENSOARG00020036689	Transcript	ENSOART00020075239.1	protein_coding	-	1/4	-	-	-	-	-	-	-	-	C	C/T	-	1	-	-	-	-	-	-	-	-	-	-	-
s60462.1	0.00701905	T	C	0.1713	T	C	0.1119	0.0594	2	247419450	MODIFIER	IFFO2	ENSOARG00020009406	Transcript	ENSOART00020014378.2	protein_coding	-	1/8	-	-	-	-	-	-	-	-	T	T/C	-	1	-	HGNC	HGNC:27006	-	-	-	-	-	-	-	-
oar3_OAR5_50722831	0.00705359	T	C	0.368	T	C	0.458	0.09	5	50994120	MODIFIER	SPRY4	ENSOARG00020033935	Transcript	ENSOART00020029714.2	protein_coding	-	1/1	-	-	-	-	-	-	-	rs405293744	T	T/C	-	-1	-	EntrezGene	-	-	-	-	-	-	-	-	-
oar3_OAR5_50722831	0.00705359	T	C	0.368	T	C	0.458	0.09	5	50994120	MODIFIER	SPRY4	ENSOARG00020033935	Transcript	ENSOART00020043690.1	protein_coding	-	1/2	-	-	-	-	-	-	-	rs405293744	T	T/C	-	-1	-	EntrezGene	-	-	-	-	-	-	-	-	-
oar3_OAR5_50722831	0.00705359	T	C	0.368	T	C	0.458	0.09	5	50994120	MODIFIER	SPRY4	ENSOARG00020033935	Transcript	ENSOART00020053183.1	protein_coding	-	1/2	-	-	-	-	-	-	-	rs405293744	T	T/C	-	-1	-	EntrezGene	-	-	-	-	-	-	-	-	-
oar3_OAR5_50722831	0.00705359	T	C	0.368	T	C	0.458	0.09	5	50994120	MODIFIER	SPRY4	ENSOARG00020033935	Transcript	ENSOART00020056587.1	protein_coding	-	1/2	-	-	-	-	-	-	-	rs405293744	T	T/C	-	-1	-	EntrezGene	-	-	-	-	-	-	-	-	-
oar3_OAR5_50722831	0.00705359	T	C	0.368	T	C	0.458	0.09	5	50994120	MODIFIER	SPRY4	ENSOARG00020033935	Transcript	ENSOART00020060332.1	protein_coding	-	-	-	-	-	-	-	-	-	rs405293744	T	T/C	4249	-1	-	EntrezGene	-	-	-	-	-	-	-	-	-
oar3_OAR5_50722831	0.00705359	T	C	0.368	T	C	0.458	0.09	5	50994120	MODIFIER	SPRY4	ENSOARG00020033935	Transcript	ENSOART00020060946.1	protein_coding	-	1/1	-	-	-	-	-	-	-	rs405293744	T	T/C	-	-1	-	EntrezGene	-	-	-	-	-	-	-	-	-
oar3_OAR5_50722831	0.00705359	T	C	0.368	T	C	0.458	0.09	5	50994120	MODIFIER	SPRY4	ENSOARG00020033935	Transcript	ENSOART00020073712.1	protein_coding	-	1/3	-	-	-	-	-	-	-	rs405293744	T	T/C	-	-1	-	EntrezGene	-	-	-	-	-	-	-	-	-
oar3_OAR5_50722831	0.00705359	T	C	0.368	T	C	0.458	0.09	5	50994120	MODIFIER	SPRY4	ENSOARG00020033935	Transcript	ENSOART00020075082.1	protein_coding	-	1/2	-	-	-	-	-	-	-	rs405293744	T	T/C	-	-1	-	EntrezGene	-	-	-	-	-	-	-	-	-
oar3_OAR5_50722831	0.00705359	T	C	0.368	T	C	0.458	0.09	5	50994120	MODIFIER	SPRY4	ENSOARG00020033935	Transcript	ENSOART00020080292.1	protein_coding	-	1/2	-	-	-	-	-	-	-	rs405293744	T	T/C	-	-1	-	EntrezGene	-	-	-	-	-	-	-	-	-
oar3_OAR10_62808504	0.007074	G	A	0.477	G	A	0.3696	0.1074	10	62918329	MODIFIER	-	-	-	-	-	-	-	-	-	-	-	-	-	-	rs404572514	G	G/A	-	-	-	-	-	-	-	-	-	-	-	-	-
OAR6_114156065.1	0.00707856	T	C	0.2612	T	C	0.3776	0.1164	6	104724143	MODIFIER	STK32B	ENSOARG00020024051	Transcript	ENSOART00020037725.2	protein_coding	-	1/11	-	-	-	-	-	-	-	-	T	T/C	-	-1	-	HGNC	HGNC:14217	-	-	-	-	-	-	-	-
OAR6_114156065.1	0.00707856	T	C	0.2612	T	C	0.3776	0.1164	6	104724143	MODIFIER	STK32B	ENSOARG00020024051	Transcript	ENSOART00020037748.2	protein_coding	-	1/10	-	-	-	-	-	-	-	-	T	T/C	-	-1	-	HGNC	HGNC:14217	-	-	-	-	-	-	-	-
oar3_OAR17_13911424	0.00710396	A	C	0.4494	C	A	0.4301	0.1205	17	14299155	MODIFIER	-	-	-	-	-	-	-	-	-	-	-	-	-	-	-	A	A/C	-	-	-	-	-	-	-	-	-	-	-	-	-
OAR1_83030838.1	0.0071225	T	C	0.2556	T	C	0.3671	0.1115	1	78601862	MODIFIER	S1PR1	ENSOARG00020002463	Transcript	ENSOART00020003781.2	protein_coding	-	-	-	-	-	-	-	-	-	-	T	T/C	4496	1	-	HGNC	HGNC:3165	-	-	-	-	-	-	-	-
OAR1_83030838.1	0.0071225	T	C	0.2556	T	C	0.3671	0.1115	1	78601862	MODIFIER	S1PR1	ENSOARG00020002463	Transcript	ENSOART00020079752.1	protein_coding	-	-	-	-	-	-	-	-	-	-	T	T/C	4170	1	-	HGNC	HGNC:3165	-	-	-	-	-	-	-	-
OAR3_77576280.1	0.00713909	C	A	0.4522	A	C	0.4545	0.0933	3	73525598	MODIFIER	NRXN1	ENSOARG00020001627	Transcript	ENSOART00020004438.2	protein_coding	-	3/20	-	-	-	-	-	-	-	rs430455648	C	C/A	-	1	-	Uniprot_gn	-	-	-	-	-	-	-	-	-
OAR3_77576280.1	0.00713909	C	A	0.4522	A	C	0.4545	0.0933	3	73525598	MODIFIER	NRXN1	ENSOARG00020001627	Transcript	ENSOART00020004455.2	protein_coding	-	4/21	-	-	-	-	-	-	-	rs430455648	C	C/A	-	1	-	Uniprot_gn	-	-	-	-	-	-	-	-	-
OAR3_77576280.1	0.00713909	C	A	0.4522	A	C	0.4545	0.0933	3	73525598	MODIFIER	NRXN1	ENSOARG00020001627	Transcript	ENSOART00020004466.2	protein_coding	-	3/19	-	-	-	-	-	-	-	rs430455648	C	C/A	-	1	-	Uniprot_gn	-	-	-	-	-	-	-	-	-
OAR3_77576280.1	0.00713909	C	A	0.4522	A	C	0.4545	0.0933	3	73525598	MODIFIER	NRXN1	ENSOARG00020001627	Transcript	ENSOART00020004473.2	protein_coding	-	4/20	-	-	-	-	-	-	-	rs430455648	C	C/A	-	1	-	Uniprot_gn	-	-	-	-	-	-	-	-	-
OAR3_77576280.1	0.00713909	C	A	0.4522	A	C	0.4545	0.0933	3	73525598	MODIFIER	NRXN1	ENSOARG00020001627	Transcript	ENSOART00020004511.2	protein_coding	-	4/21	-	-	-	-	-	-	-	rs430455648	C	C/A	-	1	-	Uniprot_gn	-	-	-	-	-	-	-	-	-
OAR3_77576280.1	0.00713909	C	A	0.4522	A	C	0.4545	0.0933	3	73525598	MODIFIER	NRXN1	ENSOARG00020001627	Transcript	ENSOART00020004538.2	protein_coding	-	3/19	-	-	-	-	-	-	-	rs430455648	C	C/A	-	1	-	Uniprot_gn	-	-	-	-	-	-	-	-	-
OAR3_77576280.1	0.00713909	C	A	0.4522	A	C	0.4545	0.0933	3	73525598	MODIFIER	NRXN1	ENSOARG00020001627	Transcript	ENSOART00020004574.2	protein_coding	-	1/18	-	-	-	-	-	-	-	rs430455648	C	C/A	-	1	-	Uniprot_gn	-	-	-	-	-	-	-	-	-
oar3_OAR1_78226543	0.00714756	G	A	0.4719	A	G	0.4371	0.091	1	79068030	MODIFIER	-	-	-	-	-	-	-	-	-	-	-	-	-	-	rs420677047	G	G/A	-	-	-	-	-	-	-	-	-	-	-	-	-
oar3_OAR3_82580949	0.00715294	T	G	0.2191	T	G	0.3322	0.1131	3	82660494	MODIFIER	-	-	-	-	-	-	-	-	-	-	-	-	-	-	-	T	T/G	-	-	-	-	-	-	-	-	-	-	-	-	-
OAR1_47969746.1	0.00720916	T	C	0.4719	T	C	0.3776	0.0943	1	46603306	MODIFIER	-	ENSOARG00020036312	Transcript	ENSOART00020079672.1	protein_coding	-	1/1	-	-	-	-	-	-	-	-	T	T/C	-	-1	-	-	-	-	-	-	-	-	-	-	-
OAR1_47969746.1	0.00720916	T	C	0.4719	T	C	0.3776	0.0943	1	46603306	MODIFIER	PTGER3	ENSOARG00020013470	Transcript	ENSOART00020048491.1	protein_coding	-	3/3	-	-	-	-	-	-	-	-	T	T/C	-	-1	-	HGNC	HGNC:9595	-	-	-	-	-	-	-	-
OAR1_47969746.1	0.00720916	T	C	0.4719	T	C	0.3776	0.0943	1	46603306	MODIFIER	PTGER3	ENSOARG00020013470	Transcript	ENSOART00020055551.1	protein_coding	-	3/3	-	-	-	-	-	-	-	-	T	T/C	-	-1	-	HGNC	HGNC:9595	-	-	-	-	-	-	-	-
OAR1_47969746.1	0.00720916	T	C	0.4719	T	C	0.3776	0.0943	1	46603306	MODIFIER	PTGER3	ENSOARG00020013470	Transcript	ENSOART00020063910.1	protein_coding	-	3/3	-	-	-	-	-	-	-	-	T	T/C	-	-1	-	HGNC	HGNC:9595	-	-	-	-	-	-	-	-
OAR1_47969746.1	0.00720916	T	C	0.4719	T	C	0.3776	0.0943	1	46603306	MODIFIER	PTGER3	ENSOARG00020013470	Transcript	ENSOART00020078668.1	protein_coding	-	3/3	-	-	-	-	-	-	-	-	T	T/C	-	-1	-	HGNC	HGNC:9595	-	-	-	-	-	-	-	-
OAR1_47449016.1	0.0072717	C	A	0.486	A	C	0.3986	0.1154	1	46158856	MODIFIER	ANKRD13C	ENSOARG00020012714	Transcript	ENSOART00020019794.2	protein_coding	-	-	-	-	-	-	-	-	-	-	C	C/A	156	-1	-	HGNC	HGNC:25374	-	-	-	-	-	-	-	-
OAR1_47449016.1	0.0072717	C	A	0.486	A	C	0.3986	0.1154	1	46158856	MODIFIER	ANKRD13C	ENSOARG00020012714	Transcript	ENSOART00020019844.2	protein_coding	-	-	-	-	-	-	-	-	-	-	C	C/A	156	-1	-	HGNC	HGNC:25374	-	-	-	-	-	-	-	-
OAR1_47449016.1	0.0072717	C	A	0.486	A	C	0.3986	0.1154	1	46158856	MODIFIER	ANKRD13C	ENSOARG00020012714	Transcript	ENSOART00020042906.1	protein_coding	-	-	-	-	-	-	-	-	-	-	C	C/A	276	-1	-	HGNC	HGNC:25374	-	-	-	-	-	-	-	-
OAR1_47449016.1	0.0072717	C	A	0.486	A	C	0.3986	0.1154	1	46158856	MODIFIER	ANKRD13C	ENSOARG00020012714	Transcript	ENSOART00020054363.1	protein_coding	-	-	-	-	-	-	-	-	-	-	C	C/A	156	-1	-	HGNC	HGNC:25374	-	-	-	-	-	-	-	-
Chr19:52957250	0.00727262	T	C	0.233	T	C	0.1643	0.0687	19	53036363	MODERATE	CCR2	ENSOARG00020027153	Transcript	ENSOART00020072854.1	protein_coding	1/1	-	-	-	675	664	222	M/V	Atg/Gtg	-	T	T/C	-	-1	-	HGNC	HGNC:1603	-	-	-	-	-	-	-	-
Chr19:52957250	0.00727262	T	C	0.233	T	C	0.1643	0.0687	19	53036363	MODERATE	CCR2	ENSOARG00020027153	Transcript	ENSOART00020075862.1	protein_coding	1/1	-	-	-	675	664	222	M/V	Atg/Gtg	-	T	T/C	-	-1	-	HGNC	HGNC:1603	-	-	-	-	-	-	-	-
s49485.1	0.00734716	T	C	0.4343	C	T	0.461	0.1047	19	48660160	MODIFIER	-	-	-	-	-	-	-	-	-	-	-	-	-	-	-	T	T/C	-	-	-	-	-	-	-	-	-	-	-	-	-
OAR3_55514616.1	0.00738218	C	A	0.4242	A	C	0.4755	0.1003	3	52700503	MODIFIER	-	-	-	-	-	-	-	-	-	-	-	-	-	-	-	C	C/A	-	-	-	-	-	-	-	-	-	-	-	-	-
oar3_OAR2_51607394	0.00738362	G	A	0.1938	G	A	0.1084	0.0854	2	51906273	MODIFIER	-	-	-	-	-	-	-	-	-	-	-	-	-	-	-	G	G/A	-	-	-	-	-	-	-	-	-	-	-	-	-
OAR6_16739273.1	0.00739124	G	A	0.3904	G	A	0.2483	0.1421	6	14215104	MODIFIER	-	-	-	-	-	-	-	-	-	-	-	-	-	-	rs417173650	G	G/A	-	-	-	-	-	-	-	-	-	-	-	-	-
OAR15_22691456.1	0.00739257	A	G	0.4415	A	G	0.3297	0.1118	15	22005976	MODIFIER	DIXDC1	ENSOARG00020018135	Transcript	ENSOART00020027974.2	protein_coding	-	15/19	-	-	-	-	-	-	-	rs422190926	A	A/G	-	1	-	HGNC	HGNC:23695	-	-	-	-	-	-	-	-
OAR15_22691456.1	0.00739257	A	G	0.4415	A	G	0.3297	0.1118	15	22005976	MODIFIER	DIXDC1	ENSOARG00020018135	Transcript	ENSOART00020028468.2	protein_coding	-	16/20	-	-	-	-	-	-	-	rs422190926	A	A/G	-	1	-	HGNC	HGNC:23695	-	-	-	-	-	-	-	-
OAR15_22691456.1	0.00739257	A	G	0.4415	A	G	0.3297	0.1118	15	22005976	MODIFIER	DIXDC1	ENSOARG00020018135	Transcript	ENSOART00020028549.2	protein_coding	-	11/15	-	-	-	-	-	-	-	rs422190926	A	A/G	-	1	-	HGNC	HGNC:23695	-	-	-	-	-	-	-	-
OAR15_22691456.1	0.00739257	A	G	0.4415	A	G	0.3297	0.1118	15	22005976	MODIFIER	DIXDC1	ENSOARG00020018135	Transcript	ENSOART00020080284.1	protein_coding	-	11/15	-	-	-	-	-	-	-	rs422190926	A	A/G	-	1	-	HGNC	HGNC:23695	-	-	-	-	-	-	-	-
OAR15_22691456.1	0.00739257	A	G	0.4415	A	G	0.3297	0.1118	15	22005976	MODIFIER	DIXDC1	ENSOARG00020018135	Transcript	ENSOART00020080596.1	protein_coding	-	16/20	-	-	-	-	-	-	-	rs422190926	A	A/G	-	1	-	HGNC	HGNC:23695	-	-	-	-	-	-	-	-
OAR3_126155573.1	0.0074091	T	C	0.4944	C	T	0.3986	0.107	3	118443249	MODIFIER	METTL25	ENSOARG00020039972	Transcript	ENSOART00020051030.1	protein_coding	-	5/5	-	-	-	-	-	-	-	-	T	T/C	-	1	-	HGNC	HGNC:26228	-	-	-	-	-	-	-	-
OAR3_126155573.1	0.0074091	T	C	0.4944	C	T	0.3986	0.107	3	118443249	MODIFIER	METTL25	ENSOARG00020039972	Transcript	ENSOART00020055308.1	protein_coding	-	-	-	-	-	-	-	-	-	-	T	T/C	2634	1	-	HGNC	HGNC:26228	-	-	-	-	-	-	-	-
OAR3_126155573.1	0.0074091	T	C	0.4944	C	T	0.3986	0.107	3	118443249	MODIFIER	METTL25	ENSOARG00020039972	Transcript	ENSOART00020060684.1	protein_coding	-	5/5	-	-	-	-	-	-	-	-	T	T/C	-	1	-	HGNC	HGNC:26228	-	-	-	-	-	-	-	-
OAR3_126155573.1	0.0074091	T	C	0.4944	C	T	0.3986	0.107	3	118443249	MODIFIER	METTL25	ENSOARG00020039972	Transcript	ENSOART00020063532.1	protein_coding	-	5/13	-	-	-	-	-	-	-	-	T	T/C	-	1	-	HGNC	HGNC:26228	-	-	-	-	-	-	-	-
OAR3_126155573.1	0.0074091	T	C	0.4944	C	T	0.3986	0.107	3	118443249	MODIFIER	METTL25	ENSOARG00020039972	Transcript	ENSOART00020076586.1	protein_coding	-	5/11	-	-	-	-	-	-	-	-	T	T/C	-	1	-	HGNC	HGNC:26228	-	-	-	-	-	-	-	-
oar3_OAR20_46007808	0.00743297	A	G	0.3258	A	G	0.3979	0.0721	20	46217347	MODIFIER	-	-	-	-	-	-	-	-	-	-	-	-	-	-	rs419092042	A	A/G	-	-	-	-	-	-	-	-	-	-	-	-	-
oar3_OAR6_94037947	0.00744633	T	C	0.4298	C	T	0.4615	0.1087	6	95117652	MODIFIER	-	-	-	-	-	-	-	-	-	-	-	-	-	-	-	T	T/C	-	-	-	-	-	-	-	-	-	-	-	-	-
OAR15_63361337.1	0.00746082	A	G	0.4017	G	A	0.4825	0.1158	15	58530216	MODIFIER	-	-	-	-	-	-	-	-	-	-	-	-	-	-	-	A	A/G	-	-	-	-	-	-	-	-	-	-	-	-	-
s41653.1	0.00749192	C	T	0.25	C	T	0.3392	0.0892	18	63686462	MODIFIER	-	-	-	-	-	-	-	-	-	-	-	-	-	-	rs426389602	C	C/T	-	-	-	-	-	-	-	-	-	-	-	-	-
oar3_OAR17_23510769	0.00751684	T	C	0.2331	T	C	0.3217	0.0886	17	23938715	MODIFIER	-	-	-	-	-	-	-	-	-	-	-	-	-	-	-	T	T/C	-	-	-	-	-	-	-	-	-	-	-	-	-
oar3_OAR3_4674411	0.0075177	A	G	0.3977	A	G	0.2806	0.1171	3	4747131	MODIFIER	-	-	-	-	-	-	-	-	-	-	-	-	-	-	rs421862202	A	A/G	-	-	-	-	-	-	-	-	-	-	-	-	-
s06559.1	0.00752753	T	C	0.435	T	C	0.3617	0.0733	8	23179312	MODIFIER	-	-	-	-	-	-	-	-	-	-	-	-	-	-	-	T	T/C	-	-	-	-	-	-	-	-	-	-	-	-	-
OAR15_29161278.1	0.00753027	G	A	0.4747	A	G	0.4231	0.1022	15	28078635	MODIFIER	DSCAML1	ENSOARG00020006009	Transcript	ENSOART00020009972.2	protein_coding	-	3/32	-	-	-	-	-	-	-	-	G	G/A	-	-1	-	HGNC	HGNC:14656	-	-	-	-	-	-	-	-
OAR15_29161278.1	0.00753027	G	A	0.4747	A	G	0.4231	0.1022	15	28078635	MODIFIER	DSCAML1	ENSOARG00020006009	Transcript	ENSOART00020010125.2	protein_coding	-	2/30	-	-	-	-	-	-	-	-	G	G/A	-	-1	-	HGNC	HGNC:14656	-	-	-	-	-	-	-	-
oar3_OAR7_37835176	0.00760994	T	G	0.3006	T	G	0.3776	0.077	7	39002835	MODIFIER	MDGA2	ENSOARG00020020011	Transcript	ENSOART00020031026.2	protein_coding	-	1/16	-	-	-	-	-	-	-	-	T	T/G	-	-1	-	HGNC	HGNC:19835	-	-	-	-	-	-	-	-
s09724.1	0.00762103	C	G	0.4916	C	G	0.3741	0.1175	5	48544781	MODIFIER	CXXC5	ENSOARG00020018590	Transcript	ENSOART00020028599.2	protein_coding	-	2/2	-	-	-	-	-	-	-	rs160085654	C	C/G	-	1	-	HGNC	HGNC:26943	-	-	-	-	-	-	-	-
s09724.1	0.00762103	C	G	0.4916	C	G	0.3741	0.1175	5	48544781	MODIFIER	CXXC5	ENSOARG00020018590	Transcript	ENSOART00020044580.1	protein_coding	-	4/4	-	-	-	-	-	-	-	rs160085654	C	C/G	-	1	-	HGNC	HGNC:26943	-	-	-	-	-	-	-	-
s09724.1	0.00762103	C	G	0.4916	C	G	0.3741	0.1175	5	48544781	MODIFIER	CXXC5	ENSOARG00020018590	Transcript	ENSOART00020050060.1	protein_coding	-	-	-	-	-	-	-	-	-	rs160085654	C	C/G	735	1	-	HGNC	HGNC:26943	-	-	-	-	-	-	-	-
s09724.1	0.00762103	C	G	0.4916	C	G	0.3741	0.1175	5	48544781	MODIFIER	CXXC5	ENSOARG00020018590	Transcript	ENSOART00020064710.1	protein_coding	-	2/2	-	-	-	-	-	-	-	rs160085654	C	C/G	-	1	-	HGNC	HGNC:26943	-	-	-	-	-	-	-	-
s09724.1	0.00762103	C	G	0.4916	C	G	0.3741	0.1175	5	48544781	MODIFIER	CXXC5	ENSOARG00020018590	Transcript	ENSOART00020066255.1	protein_coding	-	-	-	-	-	-	-	-	-	rs160085654	C	C/G	735	1	-	HGNC	HGNC:26943	-	-	-	-	-	-	-	-
s09724.1	0.00762103	C	G	0.4916	C	G	0.3741	0.1175	5	48544781	MODIFIER	CXXC5	ENSOARG00020018590	Transcript	ENSOART00020075570.1	protein_coding	-	-	-	-	-	-	-	-	-	rs160085654	C	C/G	735	1	-	HGNC	HGNC:26943	-	-	-	-	-	-	-	-
s09724.1	0.00762103	C	G	0.4916	C	G	0.3741	0.1175	5	48544781	MODIFIER	CXXC5	ENSOARG00020018590	Transcript	ENSOART00020080747.1	protein_coding	-	-	-	-	-	-	-	-	-	rs160085654	C	C/G	735	1	-	HGNC	HGNC:26943	-	-	-	-	-	-	-	-
oar3_OAR4_110004358	0.00766597	C	T	0.4579	C	T	0.3357	0.1222	4	111797081	MODIFIER	CNTNAP2	ENSOARG00020006838	Transcript	ENSOART00020010769.2	protein_coding	-	9/23	-	-	-	-	-	-	-	rs411396794	C	C/T	-	1	-	HGNC	HGNC:13830	-	-	-	-	-	-	-	-
oar3_OAR4_110004358	0.00766597	C	T	0.4579	C	T	0.3357	0.1222	4	111797081	MODIFIER	CNTNAP2	ENSOARG00020006838	Transcript	ENSOART00020010943.2	protein_coding	-	10/24	-	-	-	-	-	-	-	rs411396794	C	C/T	-	1	-	HGNC	HGNC:13830	-	-	-	-	-	-	-	-
oar3_OAR4_110004358	0.00766597	C	T	0.4579	C	T	0.3357	0.1222	4	111797081	MODIFIER	CNTNAP2	ENSOARG00020006838	Transcript	ENSOART00020011012.2	protein_coding	-	9/22	-	-	-	-	-	-	-	rs411396794	C	C/T	-	1	-	HGNC	HGNC:13830	-	-	-	-	-	-	-	-
oar3_OAR4_110004358	0.00766597	C	T	0.4579	C	T	0.3357	0.1222	4	111797081	MODIFIER	CNTNAP2	ENSOARG00020006838	Transcript	ENSOART00020011124.2	protein_coding	-	8/22	-	-	-	-	-	-	-	rs411396794	C	C/T	-	1	-	HGNC	HGNC:13830	-	-	-	-	-	-	-	-
oar3_OAR4_110004358	0.00766597	C	T	0.4579	C	T	0.3357	0.1222	4	111797081	MODIFIER	CNTNAP2	ENSOARG00020006838	Transcript	ENSOART00020063269.1	protein_coding	-	9/23	-	-	-	-	-	-	-	rs411396794	C	C/T	-	1	-	HGNC	HGNC:13830	-	-	-	-	-	-	-	-
OAR23_3384592.1	0.00768358	C	T	0.3006	C	T	0.4021	0.1015	23	3347397	MODIFIER	-	-	-	-	-	-	-	-	-	-	-	-	-	-	rs419369547	C	C/T	-	-	-	-	-	-	-	-	-	-	-	-	-
oar3_OAR1_274703630	0.00769579	G	A	0.4466	G	A	0.3497	0.0969	1	277635426	MODIFIER	KCNH8	ENSOARG00020022125	Transcript	ENSOART00020034561.2	protein_coding	-	5/15	-	-	-	-	-	-	-	-	G	G/A	-	1	-	HGNC	HGNC:18864	-	-	-	-	-	-	-	-
s65956.1_dup	0.00772368	C	T	0.1854	C	T	0.3042	0.1188	20	32565269	MODIFIER	-	-	-	-	-	-	-	-	-	-	-	-	-	-	-	C	C/T	-	-	-	-	-	-	-	-	-	-	-	-	-
OAR15_63057402.1	0.00775414	T	C	0.4971	T	C	0.3913	0.1058	15	58236400	MODIFIER	-	-	-	-	-	-	-	-	-	-	-	-	-	-	rs408787661	T	T/C	-	-	-	-	-	-	-	-	-	-	-	-	-
oar3_OAR5_90038501	0.00777243	G	A	0.4522	G	A	0.3427	0.1095	5	90325014	MODIFIER	-	ENSOARG00020039819	Transcript	ENSOART00020060770.1	lncRNA	-	1/2	-	-	-	-	-	-	-	-	G	G/A	-	-1	-	-	-	-	-	-	-	-	-	-	-
oar3_OAR2_50694123	0.00779717	C	T	0.3483	C	T	0.2448	0.1035	2	51006645	MODIFIER	FRMPD1	ENSOARG00020002157	Transcript	ENSOART00020003321.2	protein_coding	-	-	-	-	-	-	-	-	-	rs412156948	C	C/T	3895	-1	-	HGNC	HGNC:29159	-	-	-	-	-	-	-	-
oar3_OAR2_50694123	0.00779717	C	T	0.3483	C	T	0.2448	0.1035	2	51006645	MODIFIER	TRMT10B	ENSOARG00020002128	Transcript	ENSOART00020003251.2	protein_coding	-	1/8	-	-	-	-	-	-	-	rs412156948	C	C/T	-	-1	-	Uniprot_gn	-	-	-	-	-	-	-	-	-
oar3_OAR2_50694123	0.00779717	C	T	0.3483	C	T	0.2448	0.1035	2	51006645	MODIFIER	TRMT10B	ENSOARG00020002128	Transcript	ENSOART00020003262.2	protein_coding	-	-	-	-	-	-	-	-	-	rs412156948	C	C/T	2072	-1	-	Uniprot_gn	-	-	-	-	-	-	-	-	-
oar3_OAR26_5948518	0.0078092	G	A	0.3596	G	A	0.458	0.0984	26	6343906	MODIFIER	-	ENSOARG00020024550	Transcript	ENSOART00020038432.2	protein_coding	-	-	-	-	-	-	-	-	-	rs416025527	G	G/A	3201	1	-	-	-	-	-	-	-	-	-	-	-
oar3_OAR26_5948518	0.0078092	G	A	0.3596	G	A	0.458	0.0984	26	6343906	MODIFIER	-	ENSOARG00020027050	Transcript	ENSOART00020042275.1	protein_coding	-	1/1	-	-	-	-	-	-	-	rs416025527	G	G/A	-	1	-	-	-	-	-	-	-	-	-	-	-
oar3_OAR26_5948518	0.0078092	G	A	0.3596	G	A	0.458	0.0984	26	6343906	MODIFIER	-	ENSOARG00020034906	Transcript	ENSOART00020044690.1	protein_coding	-	-	-	-	-	-	-	-	-	rs416025527	G	G/A	4222	1	-	-	-	-	-	-	-	-	-	-	-
OAR1_79446392.1	0.0078406	G	A	0.0618	G	A	0.1189	0.0571	1	75056727	MODIFIER	DPYD	ENSOARG00020001219	Transcript	ENSOART00020001839.2	protein_coding	-	3/22	-	-	-	-	-	-	-	-	G	G/A	-	-1	-	HGNC	HGNC:3012	-	-	-	-	-	-	-	-
OAR1_79446392.1	0.0078406	G	A	0.0618	G	A	0.1189	0.0571	1	75056727	MODIFIER	DPYD	ENSOARG00020001219	Transcript	ENSOART00020001892.2	protein_coding	-	3/21	-	-	-	-	-	-	-	-	G	G/A	-	-1	-	HGNC	HGNC:3012	-	-	-	-	-	-	-	-
OAR1_79446392.1	0.0078406	G	A	0.0618	G	A	0.1189	0.0571	1	75056727	MODIFIER	DPYD	ENSOARG00020001219	Transcript	ENSOART00020001980.2	protein_coding	-	3/22	-	-	-	-	-	-	-	-	G	G/A	-	-1	-	HGNC	HGNC:3012	-	-	-	-	-	-	-	-
OAR1_79446392.1	0.0078406	G	A	0.0618	G	A	0.1189	0.0571	1	75056727	MODIFIER	DPYD	ENSOARG00020001219	Transcript	ENSOART00020002016.2	protein_coding	-	3/22	-	-	-	-	-	-	-	-	G	G/A	-	-1	-	HGNC	HGNC:3012	-	-	-	-	-	-	-	-
OAR1_79446392.1	0.0078406	G	A	0.0618	G	A	0.1189	0.0571	1	75056727	MODIFIER	DPYD	ENSOARG00020001219	Transcript	ENSOART00020002153.2	protein_coding	-	3/11	-	-	-	-	-	-	-	-	G	G/A	-	-1	-	HGNC	HGNC:3012	-	-	-	-	-	-	-	-
OAR16_17379899.1	0.00784796	T	G	0.1545	T	G	0.06993	0.08457	16	15855973	MODIFIER	-	ENSOARG00020027947	Transcript	ENSOART00020050392.1	lncRNA	-	3/4	-	-	-	-	-	-	-	-	T	T/G	-	1	-	-	-	-	-	-	-	-	-	-	-
OAR16_17379899.1	0.00784796	T	G	0.1545	T	G	0.06993	0.08457	16	15855973	MODIFIER	-	ENSOARG00020027947	Transcript	ENSOART00020051241.1	lncRNA	-	2/3	-	-	-	-	-	-	-	-	T	T/G	-	1	-	-	-	-	-	-	-	-	-	-	-
OAR3_214771335.1	0.0078577	T	C	0.3708	T	C	0.2727	0.0981	3	200376772	MODIFIER	RERG	ENSOARG00020035729	Transcript	ENSOART00020003993.2	protein_coding	-	2/4	-	-	-	-	-	-	-	-	T	T/C	-	1	-	Uniprot_gn	-	-	-	-	-	-	-	-	-
OAR3_214771335.1	0.0078577	T	C	0.3708	T	C	0.2727	0.0981	3	200376772	MODIFIER	RERG	ENSOARG00020035729	Transcript	ENSOART00020047938.1	protein_coding	-	2/5	-	-	-	-	-	-	-	-	T	T/C	-	1	-	Uniprot_gn	-	-	-	-	-	-	-	-	-
OAR3_214771335.1	0.0078577	T	C	0.3708	T	C	0.2727	0.0981	3	200376772	MODIFIER	RERG	ENSOARG00020035729	Transcript	ENSOART00020067599.1	protein_coding	-	1/3	-	-	-	-	-	-	-	-	T	T/C	-	1	-	Uniprot_gn	-	-	-	-	-	-	-	-	-
oar3_OAR24_11165991	0.00789806	A	G	0.2528	A	G	0.1678	0.085	24	11693991	MODIFIER	SNX29	ENSOARG00020018416	Transcript	ENSOART00020028346.2	protein_coding	-	20/21	-	-	-	-	-	-	-	rs415451282	A	A/G	-	1	-	HGNC	HGNC:30542	-	-	-	-	-	-	-	-
oar3_OAR24_11165991	0.00789806	A	G	0.2528	A	G	0.1678	0.085	24	11693991	MODIFIER	SNX29	ENSOARG00020018416	Transcript	ENSOART00020028520.2	protein_coding	-	19/21	-	-	-	-	-	-	-	rs415451282	A	A/G	-	1	-	HGNC	HGNC:30542	-	-	-	-	-	-	-	-
oar3_OAR24_11165991	0.00789806	A	G	0.2528	A	G	0.1678	0.085	24	11693991	MODIFIER	SNX29	ENSOARG00020018416	Transcript	ENSOART00020028674.2	protein_coding	-	19/20	-	-	-	-	-	-	-	rs415451282	A	A/G	-	1	-	HGNC	HGNC:30542	-	-	-	-	-	-	-	-
OAR3_149908723.1	0.00798689	T	C	0.486	T	C	0.3846	0.1014	3	140321394	MODIFIER	-	-	-	-	-	-	-	-	-	-	-	-	-	-	-	T	T/C	-	-	-	-	-	-	-	-	-	-	-	-	-
s65956.1	0.00799462	G	A	0.1818	G	A	0.3028	0.121	20	29592745	MODIFIER	ZKSCAN8	ENSOARG00020006714	Transcript	ENSOART00020010332.2	protein_coding	1/7	-	-	-	134	-	-	-	-	-	G	G/A	-	-1	-	Uniprot_gn	-	-	-	-	-	-	-	-	-
OAR7_18356443.1	0.00800564	G	A	0.2135	G	A	0.3147	0.1012	7	17861030	MODIFIER	LRRC49	ENSOARG00020017522	Transcript	ENSOART00020026979.2	protein_coding	-	11/15	-	-	-	-	-	-	-	-	G	G/A	-	1	-	HGNC	HGNC:25965	-	-	-	-	-	-	-	-
OAR7_18356443.1	0.00800564	G	A	0.2135	G	A	0.3147	0.1012	7	17861030	MODIFIER	LRRC49	ENSOARG00020017522	Transcript	ENSOART00020027175.2	protein_coding	-	12/16	-	-	-	-	-	-	-	-	G	G/A	-	1	-	HGNC	HGNC:25965	-	-	-	-	-	-	-	-
OAR3_157131271.1	0.00800913	A	G	0.4354	G	A	0.4685	0.0961	3	147528077	MODIFIER	SLC2A13	ENSOARG00020001221	Transcript	ENSOART00020001832.2	protein_coding	-	6/10	-	-	-	-	-	-	-	-	A	A/G	-	1	-	Uniprot_gn	-	-	-	-	-	-	-	-	-
OAR3_157131271.1	0.00800913	A	G	0.4354	G	A	0.4685	0.0961	3	147528077	MODIFIER	SLC2A13	ENSOARG00020001221	Transcript	ENSOART00020057946.1	protein_coding	-	7/11	-	-	-	-	-	-	-	-	A	A/G	-	1	-	Uniprot_gn	-	-	-	-	-	-	-	-	-
oar3_OAR3_153924034	0.00804433	A	G	0.1292	A	G	0.05944	0.06976	3	154207849	MODIFIER	-	ENSOARG00020030985	Transcript	ENSOART00020052715.1	protein_coding	-	1/2	-	-	-	-	-	-	-	rs403766990	A	A/G	-	1	-	-	-	-	-	-	-	-	-	-	-
oar3_OAR9_55958199	0.008108	T	C	0.2809	T	C	0.2021	0.0788	9	56184146	MODIFIER	-	-	-	-	-	-	-	-	-	-	-	-	-	-	-	T	T/C	-	-	-	-	-	-	-	-	-	-	-	-	-
oar3_OAR2_48586732	0.00817735	C	T	0.3596	C	T	0.2552	0.1044	2	48906634	MODIFIER	-	ENSOARG00020030896	Transcript	ENSOART00020060988.1	protein_coding	-	-	-	-	-	-	-	-	-	-	C	C/T	1134	1	-	-	-	-	-	-	-	-	-	-	-
oar3_OAR2_48586732	0.00817735	C	T	0.3596	C	T	0.2552	0.1044	2	48906634	MODIFIER	COL15A1	ENSOARG00020001148	Transcript	ENSOART00020001731.2	protein_coding	-	2/41	-	-	-	-	-	-	-	-	C	C/T	-	-1	-	HGNC	HGNC:2192	-	-	-	-	-	-	-	-
oar3_OAR2_48586732	0.00817735	C	T	0.3596	C	T	0.2552	0.1044	2	48906634	MODIFIER	COL15A1	ENSOARG00020001148	Transcript	ENSOART00020002001.2	protein_coding	-	4/42	-	-	-	-	-	-	-	-	C	C/T	-	-1	-	HGNC	HGNC:2192	-	-	-	-	-	-	-	-
oar3_OAR16_4975858	0.00819411	T	C	0.3902	C	T	0.4894	0.1204	16	5102617	MODIFIER	-	ENSOARG00020038358	Transcript	ENSOART00020049815.1	lncRNA	-	-	-	-	-	-	-	-	-	-	T	T/C	4312	1	-	-	-	-	-	-	-	-	-	-	-
oar3_OAR16_4975858	0.00819411	T	C	0.3902	C	T	0.4894	0.1204	16	5102617	MODIFIER	-	ENSOARG00020038358	Transcript	ENSOART00020057713.1	lncRNA	-	-	-	-	-	-	-	-	-	-	T	T/C	2904	1	-	-	-	-	-	-	-	-	-	-	-
oar3_OAR16_4975858	0.00819411	T	C	0.3902	C	T	0.4894	0.1204	16	5102617	MODIFIER	-	ENSOARG00020038358	Transcript	ENSOART00020073158.1	lncRNA	-	-	-	-	-	-	-	-	-	-	T	T/C	4312	1	-	-	-	-	-	-	-	-	-	-	-
s19366.1	0.00819437	A	G	0.07022	A	G	0.1294	0.05918	18	8363999	MODIFIER	-	-	-	-	-	-	-	-	-	-	-	-	-	-	-	A	A/G	-	-	-	-	-	-	-	-	-	-	-	-	-
oar3_OAR12_60985382	0.00829417	C	T	0.4045	T	C	0.486	0.1095	12	62320022	MODIFIER	CACNA1E	ENSOARG00020024093	Transcript	ENSOART00020038041.2	protein_coding	-	34/49	-	-	-	-	-	-	-	rs412774821	C	C/T	-	1	-	HGNC	HGNC:1392	-	-	-	-	-	-	-	-
oar3_OAR12_60985382	0.00829417	C	T	0.4045	T	C	0.486	0.1095	12	62320022	MODIFIER	CACNA1E	ENSOARG00020024093	Transcript	ENSOART00020065473.1	protein_coding	-	29/43	-	-	-	-	-	-	-	rs412774821	C	C/T	-	1	-	HGNC	HGNC:1392	-	-	-	-	-	-	-	-
oar3_OAR12_60985382	0.00829417	C	T	0.4045	T	C	0.486	0.1095	12	62320022	MODIFIER	CACNA1E	ENSOARG00020024093	Transcript	ENSOART00020077717.1	protein_coding	-	33/48	-	-	-	-	-	-	-	rs412774821	C	C/T	-	1	-	HGNC	HGNC:1392	-	-	-	-	-	-	-	-
OAR22_1023592.1	0.00829759	C	T	0.3596	C	T	0.2483	0.1113	22	562722	MODIFIER	-	ENSOARG00020028149	Transcript	ENSOART00020045174.1	lncRNA	-	1/4	-	-	-	-	-	-	-	rs401383560	C	C/T	-	1	-	-	-	-	-	-	-	-	-	-	-
oar3_OAR22_554348	0.00829759	G	A	0.3596	G	A	0.2483	0.1113	22	570206	MODIFIER	-	ENSOARG00020028149	Transcript	ENSOART00020045174.1	lncRNA	-	1/4	-	-	-	-	-	-	-	rs399341549	G	G/A	-	1	-	-	-	-	-	-	-	-	-	-	-
oar3_OAR6_108170947	0.00831546	G	A	0.4663	A	G	0.422	0.1117	6	109267923	MODIFIER	RAB28	ENSOARG00020003366	Transcript	ENSOART00020005183.2	protein_coding	-	4/6	-	-	-	-	-	-	-	-	G	G/A	-	-1	-	EntrezGene	-	-	-	-	-	-	-	-	-
oar3_OAR6_108170947	0.00831546	G	A	0.4663	A	G	0.422	0.1117	6	109267923	MODIFIER	RAB28	ENSOARG00020003366	Transcript	ENSOART00020005198.2	protein_coding	-	4/7	-	-	-	-	-	-	-	-	G	G/A	-	-1	-	EntrezGene	-	-	-	-	-	-	-	-	-
oar3_OAR6_108170947	0.00831546	G	A	0.4663	A	G	0.422	0.1117	6	109267923	MODIFIER	RAB28	ENSOARG00020003366	Transcript	ENSOART00020005256.2	protein_coding	-	4/7	-	-	-	-	-	-	-	-	G	G/A	-	-1	-	EntrezGene	-	-	-	-	-	-	-	-	-
oar3_OAR6_108170947	0.00831546	G	A	0.4663	A	G	0.422	0.1117	6	109267923	MODIFIER	RAB28	ENSOARG00020003366	Transcript	ENSOART00020005307.2	protein_coding	-	4/6	-	-	-	-	-	-	-	-	G	G/A	-	-1	-	EntrezGene	-	-	-	-	-	-	-	-	-
oar3_OAR6_108170947	0.00831546	G	A	0.4663	A	G	0.422	0.1117	6	109267923	MODIFIER	RAB28	ENSOARG00020003366	Transcript	ENSOART00020005342.2	protein_coding	-	4/6	-	-	-	-	-	-	-	-	G	G/A	-	-1	-	EntrezGene	-	-	-	-	-	-	-	-	-
oar3_OAR6_108170947	0.00831546	G	A	0.4663	A	G	0.422	0.1117	6	109267923	MODIFIER	RAB28	ENSOARG00020003366	Transcript	ENSOART00020005361.2	protein_coding	-	3/3	-	-	-	-	-	-	-	-	G	G/A	-	-1	-	EntrezGene	-	-	-	-	-	-	-	-	-
oar3_OAR6_108170947	0.00831546	G	A	0.4663	A	G	0.422	0.1117	6	109267923	MODIFIER	RAB28	ENSOARG00020003366	Transcript	ENSOART00020047073.1	protein_coding	-	4/8	-	-	-	-	-	-	-	-	G	G/A	-	-1	-	EntrezGene	-	-	-	-	-	-	-	-	-
oar3_OAR6_108170947	0.00831546	G	A	0.4663	A	G	0.422	0.1117	6	109267923	MODIFIER	RAB28	ENSOARG00020003366	Transcript	ENSOART00020054296.1	protein_coding	-	4/6	-	-	-	-	-	-	-	-	G	G/A	-	-1	-	EntrezGene	-	-	-	-	-	-	-	-	-
oar3_OAR3_191554038	0.00834954	T	C	0.4209	T	C	0.2902	0.1307	3	192350832	MODIFIER	-	-	-	-	-	-	-	-	-	-	-	-	-	-	-	T	T/C	-	-	-	-	-	-	-	-	-	-	-	-	-
OAR21_23229347.1	0.00838863	T	C	0.4719	C	T	0.4441	0.084	21	18806310	MODIFIER	-	-	-	-	-	-	-	-	-	-	-	-	-	-	-	T	T/C	-	-	-	-	-	-	-	-	-	-	-	-	-
s35531.1	0.0084023	C	T	0.3483	C	T	0.4615	0.1132	13	11142059	MODIFIER	-	-	-	-	-	-	-	-	-	-	-	-	-	-	-	C	C/T	-	-	-	-	-	-	-	-	-	-	-	-	-
oar3_OAR19_33323267	0.00840318	T	C	0.2978	T	C	0.2203	0.0775	19	33416014	MODIFIER	TAFA1	ENSOARG00020022813	Transcript	ENSOART00020035439.2	protein_coding	-	2/3	-	-	-	-	-	-	-	-	T	T/C	-	-1	-	HGNC	HGNC:21587	-	-	-	-	-	-	-	-
oar3_OAR19_33323267	0.00840318	T	C	0.2978	T	C	0.2203	0.0775	19	33416014	MODIFIER	TAFA1	ENSOARG00020022813	Transcript	ENSOART00020050338.1	protein_coding	-	2/4	-	-	-	-	-	-	-	-	T	T/C	-	-1	-	HGNC	HGNC:21587	-	-	-	-	-	-	-	-
Chr2:220390415	0.00843258	G	T	0.3006	G	T	0.1888	0.1118	2	221408768	MODERATE	SPEG	ENSOARG00020014178	Transcript	ENSOART00020022489.2	protein_coding	32/42	-	-	-	7853	7654	2552	A/S	Gct/Tct	-	G	G/T	-	1	-	HGNC	HGNC:16901	-	-	-	-	-	-	-	-
oar3_OAR3_210769900	0.00846864	A	G	0.448	A	G	0.3571	0.0909	3	212615157	MODIFIER	TEAD4	ENSOARG00020011486	Transcript	ENSOART00020017464.2	protein_coding	-	-	-	-	-	-	-	-	-	-	A	A/G	591	-1	-	HGNC	HGNC:11717	-	-	-	-	-	-	-	-
oar3_OAR3_210769900	0.00846864	A	G	0.448	A	G	0.3571	0.0909	3	212615157	MODIFIER	TEAD4	ENSOARG00020011486	Transcript	ENSOART00020017664.2	protein_coding	-	-	-	-	-	-	-	-	-	-	A	A/G	593	-1	-	HGNC	HGNC:11717	-	-	-	-	-	-	-	-
oar3_OAR3_210769900	0.00846864	A	G	0.448	A	G	0.3571	0.0909	3	212615157	MODIFIER	TEAD4	ENSOARG00020011486	Transcript	ENSOART00020017790.2	protein_coding	-	-	-	-	-	-	-	-	-	-	A	A/G	593	-1	-	HGNC	HGNC:11717	-	-	-	-	-	-	-	-
oar3_OAR3_210769900	0.00846864	A	G	0.448	A	G	0.3571	0.0909	3	212615157	MODIFIER	TEAD4	ENSOARG00020011486	Transcript	ENSOART00020017938.2	protein_coding	-	-	-	-	-	-	-	-	-	-	A	A/G	592	-1	-	HGNC	HGNC:11717	-	-	-	-	-	-	-	-
oar3_OAR1_75478398	0.00853382	G	A	0.09375	G	A	0.169	0.07525	1	76311728	MODIFIER	PLPPR5	ENSOARG00020001612	Transcript	ENSOART00020002442.2	protein_coding	-	5/6	-	-	-	-	-	-	-	rs410805638	G	G/A	-	-1	-	HGNC	HGNC:31703	-	-	-	-	-	-	-	-
oar3_OAR1_75478398	0.00853382	G	A	0.09375	G	A	0.169	0.07525	1	76311728	MODIFIER	PLPPR5	ENSOARG00020001612	Transcript	ENSOART00020002460.2	protein_coding	-	7/7	-	-	-	-	-	-	-	rs410805638	G	G/A	-	-1	-	HGNC	HGNC:31703	-	-	-	-	-	-	-	-
oar3_OAR1_75478398	0.00853382	G	A	0.09375	G	A	0.169	0.07525	1	76311728	MODIFIER	PLPPR5	ENSOARG00020001612	Transcript	ENSOART00020041896.1	protein_coding	-	5/5	-	-	-	-	-	-	-	rs410805638	G	G/A	-	-1	-	HGNC	HGNC:31703	-	-	-	-	-	-	-	-
oar3_OAR1_75478398	0.00853382	G	A	0.09375	G	A	0.169	0.07525	1	76311728	MODIFIER	PLPPR5	ENSOARG00020001612	Transcript	ENSOART00020063966.1	protein_coding	-	5/5	-	-	-	-	-	-	-	rs410805638	G	G/A	-	-1	-	HGNC	HGNC:31703	-	-	-	-	-	-	-	-
s33475.1	0.00853891	T	G	0.25	T	G	0.3357	0.0857	16	24150396	MODIFIER	CDC20B	ENSOARG00020012773	Transcript	ENSOART00020019516.2	protein_coding	-	3/12	-	-	-	-	-	-	-	-	T	T/G	-	1	-	HGNC	HGNC:24222	-	-	-	-	-	-	-	-
s33475.1	0.00853891	T	G	0.25	T	G	0.3357	0.0857	16	24150396	MODIFIER	CDC20B	ENSOARG00020012773	Transcript	ENSOART00020019561.2	protein_coding	-	3/11	-	-	-	-	-	-	-	-	T	T/G	-	1	-	HGNC	HGNC:24222	-	-	-	-	-	-	-	-
s33475.1	0.00853891	T	G	0.25	T	G	0.3357	0.0857	16	24150396	MODIFIER	CDC20B	ENSOARG00020012773	Transcript	ENSOART00020060742.1	protein_coding	-	2/11	-	-	-	-	-	-	-	-	T	T/G	-	1	-	HGNC	HGNC:24222	-	-	-	-	-	-	-	-
s33475.1	0.00853891	T	G	0.25	T	G	0.3357	0.0857	16	24150396	MODIFIER	GPX8	ENSOARG00020012946	Transcript	ENSOART00020019722.2	protein_coding	-	-	-	-	-	-	-	-	-	-	T	T/G	2286	-1	-	Uniprot_gn	-	-	-	-	-	-	-	-	-
s33475.1	0.00853891	T	G	0.25	T	G	0.3357	0.0857	16	24150396	MODIFIER	GPX8	ENSOARG00020012946	Transcript	ENSOART00020019827.2	protein_coding	-	-	-	-	-	-	-	-	-	-	T	T/G	2286	-1	-	Uniprot_gn	-	-	-	-	-	-	-	-	-
s33475.1	0.00853891	T	G	0.25	T	G	0.3357	0.0857	16	24150396	MODIFIER	GPX8	ENSOARG00020012946	Transcript	ENSOART00020076444.1	protein_coding	-	-	-	-	-	-	-	-	-	-	T	T/G	2286	-1	-	Uniprot_gn	-	-	-	-	-	-	-	-	-
oar3_OAR20_45808558	0.00854339	G	T	0.3708	G	T	0.472	0.1012	20	46036589	MODIFIER	-	-	-	-	-	-	-	-	-	-	-	-	-	-	rs399910586	G	G/T	-	-	-	-	-	-	-	-	-	-	-	-	-
oar3_OAR26_5057930	0.00856369	A	G	0.3006	A	G	0.3881	0.0875	26	5466963	MODIFIER	-	-	-	-	-	-	-	-	-	-	-	-	-	-	-	A	A/G	-	-	-	-	-	-	-	-	-	-	-	-	-
s43169.1	0.00856508	A	G	0.118	A	G	0.1993	0.0813	2	248120569	MODIFIER	IGSF21	ENSOARG00020010883	Transcript	ENSOART00020016633.2	protein_coding	-	1/9	-	-	-	-	-	-	-	rs412810633	A	A/G	-	-1	-	HGNC	HGNC:28246	-	-	-	-	-	-	-	-
s43169.1	0.00856508	A	G	0.118	A	G	0.1993	0.0813	2	248120569	MODIFIER	IGSF21	ENSOARG00020010883	Transcript	ENSOART00020054678.1	protein_coding	-	2/10	-	-	-	-	-	-	-	rs412810633	A	A/G	-	-1	-	HGNC	HGNC:28246	-	-	-	-	-	-	-	-
s43169.1	0.00856508	A	G	0.118	A	G	0.1993	0.0813	2	248120569	MODIFIER	IGSF21	ENSOARG00020010883	Transcript	ENSOART00020074167.1	protein_coding	-	1/10	-	-	-	-	-	-	-	rs412810633	A	A/G	-	-1	-	HGNC	HGNC:28246	-	-	-	-	-	-	-	-
oar3_OAR25_42990553	0.00857221	A	G	0.4492	A	G	0.3601	0.0891	25	42396320	MODIFIER	-	ENSOARG00020026457	Transcript	ENSOART00020041626.2	protein_coding	-	5/5	-	-	-	-	-	-	-	-	A	A/G	-	-1	-	-	-	-	-	-	-	-	-	-	-
s25606.1	0.00857378	A	C	0.3146	A	C	0.4091	0.0945	5	27121781	MODIFIER	-	ENSOARG00020038805	Transcript	ENSOART00020042987.1	lncRNA	-	4/4	-	-	-	-	-	-	-	-	A	A/C	-	1	-	-	-	-	-	-	-	-	-	-	-
oar3_OAR3_117897236	0.00858246	T	C	0.3736	T	C	0.2692	0.1044	3	118054534	MODIFIER	-	-	-	-	-	-	-	-	-	-	-	-	-	-	-	T	T/C	-	-	-	-	-	-	-	-	-	-	-	-	-
oar3_OAR13_81695234	0.00860968	G	T	0.3652	G	T	0.2797	0.0855	13	82149652	MODIFIER	-	-	-	-	-	-	-	-	-	-	-	-	-	-	-	G	G/T	-	-	-	-	-	-	-	-	-	-	-	-	-
oar3_OAR5_47686503	0.0086126	A	G	0.236	A	G	0.3322	0.0962	5	47959626	MODIFIER	SIL1	ENSOARG00020016552	Transcript	ENSOART00020026219.2	protein_coding	-	7/9	-	-	-	-	-	-	-	-	A	A/G	-	-1	-	Uniprot_gn	-	-	-	-	-	-	-	-	-
oar3_OAR5_47686503	0.0086126	A	G	0.236	A	G	0.3322	0.0962	5	47959626	MODIFIER	SIL1	ENSOARG00020016552	Transcript	ENSOART00020026318.2	protein_coding	-	7/9	-	-	-	-	-	-	-	-	A	A/G	-	-1	-	Uniprot_gn	-	-	-	-	-	-	-	-	-
oar3_OAR5_47686503	0.0086126	A	G	0.236	A	G	0.3322	0.0962	5	47959626	MODIFIER	SIL1	ENSOARG00020016552	Transcript	ENSOART00020026378.2	protein_coding	-	7/9	-	-	-	-	-	-	-	-	A	A/G	-	-1	-	Uniprot_gn	-	-	-	-	-	-	-	-	-
Chr14:62232021	0.00861917	A	G	0.239	A	G	0.1523	0.0867	14	65976771	MODERATE	-	ENSOARG00020039719	Transcript	ENSOART00020050758.1	protein_coding	3/3	-	-	-	1317	1079	360	Y/C	tAc/tGc	rs426812567	A	A/G	-	1	-	-	-	-	-	-	-	tolerated(1)	-	-	-
Chr14:62232021	0.00861917	A	G	0.239	A	G	0.1523	0.0867	14	65976771	MODERATE	-	ENSOARG00020039719	Transcript	ENSOART00020064207.1	protein_coding	3/4	-	-	-	1317	1079	360	Y/C	tAc/tGc	rs426812567	A	A/G	-	1	-	-	-	-	-	-	-	tolerated(1)	-	-	-
Chr14:62232021	0.00861917	A	G	0.239	A	G	0.1523	0.0867	14	65976771	MODIFIER	-	ENSOARG00020033115	Transcript	ENSOART00020070588.1	protein_coding	-	-	-	-	-	-	-	-	-	rs426812567	A	A/G	119	-1	-	-	-	-	-	-	-	-	-	-	-
Chr14:62232021	0.00861917	A	G	0.239	A	G	0.1523	0.0867	14	65976771	MODIFIER	-	ENSOARG00020039719	Transcript	ENSOART00020081725.1	protein_coding	-	2/2	-	-	-	-	-	-	-	rs426812567	A	A/G	-	1	-	-	-	-	-	-	-	-	-	-	-
OAR18_1505497.1	0.0086835	T	C	0.1751	T	C	0.0979	0.0772	18	2274621	MODIFIER	ATP10A	ENSOARG00020003485	Transcript	ENSOART00020005312.2	protein_coding	-	2/21	-	-	-	-	-	-	-	-	T	T/C	-	-1	-	HGNC	HGNC:13542	-	-	-	-	-	-	-	-
OAR2_233885753.1	0.00875432	G	T	0.2079	G	T	0.1119	0.096	2	222257251	MODIFIER	-	-	-	-	-	-	-	-	-	-	-	-	-	-	-	G	G/T	-	-	-	-	-	-	-	-	-	-	-	-	-
oar3_OAR19_53366791	0.00875752	G	T	0.4494	G	T	0.3601	0.0893	19	53446241	MODIFIER	LZTFL1	ENSOARG00020025271	Transcript	ENSOART00020039626.2	protein_coding	-	2/11	-	-	-	-	-	-	-	-	G	G/T	-	1	-	Uniprot_gn	-	-	-	-	-	-	-	-	-
oar3_OAR19_53366791	0.00875752	G	T	0.4494	G	T	0.3601	0.0893	19	53446241	MODIFIER	LZTFL1	ENSOARG00020025271	Transcript	ENSOART00020079530.1	protein_coding	-	2/11	-	-	-	-	-	-	-	-	G	G/T	-	1	-	Uniprot_gn	-	-	-	-	-	-	-	-	-
Chr10:61678707	0.00879317	G	A	0.4607	G	A	0.3636	0.0971	10	61768740	MODERATE	-	ENSOARG00020003340	Transcript	ENSOART00020005090.2	protein_coding	2/2	-	-	-	802	538	180	L/F	Ctt/Ttt	rs407415964	G	G/A	-	-1	-	-	-	-	-	-	-	deleterious(0.04)	-	-	-
s40619.1	0.00882498	C	T	0.4073	C	T	0.2972	0.1101	19	55468272	MODIFIER	ATG7	ENSOARG00020025688	Transcript	ENSOART00020040306.2	protein_coding	-	16/16	-	-	-	-	-	-	-	rs399818657	C	C/T	-	1	-	HGNC	HGNC:16935	-	-	-	-	-	-	-	-
s40619.1	0.00882498	C	T	0.4073	C	T	0.2972	0.1101	19	55468272	MODIFIER	ATG7	ENSOARG00020025688	Transcript	ENSOART00020040314.2	protein_coding	-	17/17	-	-	-	-	-	-	-	rs399818657	C	C/T	-	1	-	HGNC	HGNC:16935	-	-	-	-	-	-	-	-
s40619.1	0.00882498	C	T	0.4073	C	T	0.2972	0.1101	19	55468272	MODIFIER	ATG7	ENSOARG00020025688	Transcript	ENSOART00020055956.1	protein_coding	-	18/18	-	-	-	-	-	-	-	rs399818657	C	C/T	-	1	-	HGNC	HGNC:16935	-	-	-	-	-	-	-	-
s40619.1	0.00882498	C	T	0.4073	C	T	0.2972	0.1101	19	55468272	MODIFIER	ATG7	ENSOARG00020025688	Transcript	ENSOART00020074176.1	protein_coding	-	17/17	-	-	-	-	-	-	-	rs399818657	C	C/T	-	1	-	HGNC	HGNC:16935	-	-	-	-	-	-	-	-
s40619.1	0.00882498	C	T	0.4073	C	T	0.2972	0.1101	19	55468272	MODIFIER	ATG7	ENSOARG00020025688	Transcript	ENSOART00020078554.1	protein_coding	-	16/16	-	-	-	-	-	-	-	rs399818657	C	C/T	-	1	-	HGNC	HGNC:16935	-	-	-	-	-	-	-	-
oar3_OAR6_54592844	0.00884559	A	G	0.4224	G	A	0.4746	0.103	6	55335581	MODIFIER	-	-	-	-	-	-	-	-	-	-	-	-	-	-	-	A	A/G	-	-	-	-	-	-	-	-	-	-	-	-	-
oar3_OAR11_45859173	0.00884747	T	C	0.4017	T	C	0.2867	0.115	11	46169362	MODIFIER	-	ENSOARG00020030649	Transcript	ENSOART00020057272.1	protein_coding	-	9/123	-	-	-	-	-	-	-	rs405471070	T	T/C	-	1	-	-	-	-	-	-	-	-	-	-	-
oar3_OAR11_45859173	0.00884747	T	C	0.4017	T	C	0.2867	0.115	11	46169362	MODIFIER	-	ENSOARG00020030649	Transcript	ENSOART00020065770.1	protein_coding	-	9/122	-	-	-	-	-	-	-	rs405471070	T	T/C	-	1	-	-	-	-	-	-	-	-	-	-	-
OAR7_40403081.1	0.00885647	A	G	0.2753	A	G	0.3706	0.0953	7	37348633	MODIFIER	-	-	-	-	-	-	-	-	-	-	-	-	-	-	-	A	A/G	-	-	-	-	-	-	-	-	-	-	-	-	-
oar3_OAR3_179023851	0.00885826	A	G	0.3708	A	G	0.2413	0.1295	3	179573608	MODIFIER	RBFOX2	ENSOARG00020020897	Transcript	ENSOART00020032485.2	protein_coding	-	3/13	-	-	-	-	-	-	-	-	A	A/G	-	-1	-	HGNC	HGNC:9906	-	-	-	-	-	-	-	-
oar3_OAR3_179023851	0.00885826	A	G	0.3708	A	G	0.2413	0.1295	3	179573608	MODIFIER	RBFOX2	ENSOARG00020020897	Transcript	ENSOART00020032675.2	protein_coding	-	3/10	-	-	-	-	-	-	-	-	A	A/G	-	-1	-	HGNC	HGNC:9906	-	-	-	-	-	-	-	-
oar3_OAR3_179023851	0.00885826	A	G	0.3708	A	G	0.2413	0.1295	3	179573608	MODIFIER	RBFOX2	ENSOARG00020020897	Transcript	ENSOART00020032710.2	protein_coding	-	2/12	-	-	-	-	-	-	-	-	A	A/G	-	-1	-	HGNC	HGNC:9906	-	-	-	-	-	-	-	-
oar3_OAR3_179023851	0.00885826	A	G	0.3708	A	G	0.2413	0.1295	3	179573608	MODIFIER	RBFOX2	ENSOARG00020020897	Transcript	ENSOART00020032841.2	protein_coding	-	2/12	-	-	-	-	-	-	-	-	A	A/G	-	-1	-	HGNC	HGNC:9906	-	-	-	-	-	-	-	-
oar3_OAR3_179023851	0.00885826	A	G	0.3708	A	G	0.2413	0.1295	3	179573608	MODIFIER	RBFOX2	ENSOARG00020020897	Transcript	ENSOART00020032918.2	protein_coding	-	2/11	-	-	-	-	-	-	-	-	A	A/G	-	-1	-	HGNC	HGNC:9906	-	-	-	-	-	-	-	-
oar3_OAR3_179023851	0.00885826	A	G	0.3708	A	G	0.2413	0.1295	3	179573608	MODIFIER	RBFOX2	ENSOARG00020020897	Transcript	ENSOART00020044469.1	protein_coding	-	2/12	-	-	-	-	-	-	-	-	A	A/G	-	-1	-	HGNC	HGNC:9906	-	-	-	-	-	-	-	-
oar3_OAR3_179023851	0.00885826	A	G	0.3708	A	G	0.2413	0.1295	3	179573608	MODIFIER	RBFOX2	ENSOARG00020020897	Transcript	ENSOART00020045638.1	protein_coding	-	3/12	-	-	-	-	-	-	-	-	A	A/G	-	-1	-	HGNC	HGNC:9906	-	-	-	-	-	-	-	-
oar3_OAR3_179023851	0.00885826	A	G	0.3708	A	G	0.2413	0.1295	3	179573608	MODIFIER	RBFOX2	ENSOARG00020020897	Transcript	ENSOART00020058842.1	protein_coding	-	2/13	-	-	-	-	-	-	-	-	A	A/G	-	-1	-	HGNC	HGNC:9906	-	-	-	-	-	-	-	-
oar3_OAR3_179023851	0.00885826	A	G	0.3708	A	G	0.2413	0.1295	3	179573608	MODIFIER	RBFOX2	ENSOARG00020020897	Transcript	ENSOART00020062942.1	protein_coding	-	2/12	-	-	-	-	-	-	-	-	A	A/G	-	-1	-	HGNC	HGNC:9906	-	-	-	-	-	-	-	-
oar3_OAR3_179023851	0.00885826	A	G	0.3708	A	G	0.2413	0.1295	3	179573608	MODIFIER	RBFOX2	ENSOARG00020020897	Transcript	ENSOART00020065859.1	protein_coding	-	2/12	-	-	-	-	-	-	-	-	A	A/G	-	-1	-	HGNC	HGNC:9906	-	-	-	-	-	-	-	-
OAR2_235634177.1	0.0089372	C	T	0.4209	C	T	0.3028	0.1181	2	223904605	MODIFIER	-	-	-	-	-	-	-	-	-	-	-	-	-	-	-	C	C/T	-	-	-	-	-	-	-	-	-	-	-	-	-
oar3_OAR5_31295571	0.00897712	T	C	0.4635	C	T	0.4161	0.1204	5	31522462	MODIFIER	-	ENSOARG00020027327	Transcript	ENSOART00020056561.1	lncRNA	-	2/3	-	-	-	-	-	-	-	rs413587443	T	T/C	-	-1	-	-	-	-	-	-	-	-	-	-	-
oar3_OAR5_31295571	0.00897712	T	C	0.4635	C	T	0.4161	0.1204	5	31522462	MODIFIER	-	ENSOARG00020027327	Transcript	ENSOART00020057793.1	lncRNA	-	2/2	-	-	-	-	-	-	-	rs413587443	T	T/C	-	-1	-	-	-	-	-	-	-	-	-	-	-
Chr24:16139733	0.00898794	T	G	0.227	T	G	0.3261	0.0991	24	16667758	MODIFIER	-	ENSOARG00020033658	Transcript	ENSOART00020067414.1	lncRNA	-	3/4	-	-	-	-	-	-	-	-	T	T/G	-	-1	-	-	-	-	-	-	-	-	-	-	-
Chr20:26237681	0.00902764	T	C	0.2485	T	C	0.3447	0.0962	20	26186824	MODERATE	-	ENSOARG00020023656	Transcript	ENSOART00020035741.2	protein_coding	10/10	-	-	-	1146	1136	379	D/G	gAc/gGc	-	T	T/C	-	-1	-	-	-	-	-	-	-	-	-	-	-
Chr20:26237681	0.00902764	T	C	0.2485	T	C	0.3447	0.0962	20	26186824	MODERATE	-	ENSOARG00020023656	Transcript	ENSOART00020037008.2	protein_coding	9/9	-	-	-	1146	1136	379	D/G	gAc/gGc	-	T	T/C	-	-1	-	-	-	-	-	-	-	-	-	-	-
Chr20:26237681	0.00902764	T	C	0.2485	T	C	0.3447	0.0962	20	26186824	MODERATE	-	ENSOARG00020023656	Transcript	ENSOART00020037481.2	protein_coding	9/9	-	-	-	1146	1136	379	D/G	gAc/gGc	-	T	T/C	-	-1	-	-	-	-	-	-	-	-	-	-	-
Chr20:26237681	0.00902764	T	C	0.2485	T	C	0.3447	0.0962	20	26186824	MODERATE	-	ENSOARG00020023656	Transcript	ENSOART00020037539.2	protein_coding	9/9	-	-	-	1146	1136	379	D/G	gAc/gGc	-	T	T/C	-	-1	-	-	-	-	-	-	-	-	-	-	-
oar3_OAR19_56398634	0.00909807	T	C	0.4719	C	T	0.4021	0.126	19	56489585	MODIFIER	MKRN2	ENSOARG00020025818	Transcript	ENSOART00020040560.2	protein_coding	-	6/7	-	-	-	-	-	-	-	-	T	T/C	-	-1	-	Uniprot_gn	-	-	-	-	-	-	-	-	-
oar3_OAR19_56398634	0.00909807	T	C	0.4719	C	T	0.4021	0.126	19	56489585	MODIFIER	MKRN2	ENSOARG00020025818	Transcript	ENSOART00020040566.2	protein_coding	-	5/6	-	-	-	-	-	-	-	-	T	T/C	-	-1	-	Uniprot_gn	-	-	-	-	-	-	-	-	-
oar3_OAR19_56398634	0.00909807	T	C	0.4719	C	T	0.4021	0.126	19	56489585	MODIFIER	MKRN2	ENSOARG00020025818	Transcript	ENSOART00020071324.1	protein_coding	-	6/7	-	-	-	-	-	-	-	-	T	T/C	-	-1	-	Uniprot_gn	-	-	-	-	-	-	-	-	-
oar3_OAR19_56398634	0.00909807	T	C	0.4719	C	T	0.4021	0.126	19	56489585	MODIFIER	MKRN2	ENSOARG00020025818	Transcript	ENSOART00020080102.1	protein_coding	-	6/7	-	-	-	-	-	-	-	-	T	T/C	-	-1	-	Uniprot_gn	-	-	-	-	-	-	-	-	-
s60506.1	0.00912511	T	C	0.1208	T	C	0.06993	0.05087	24	12712045	MODIFIER	-	-	-	-	-	-	-	-	-	-	-	-	-	-	-	T	T/C	-	-	-	-	-	-	-	-	-	-	-	-	-
OAR6_35488795.1	0.00919916	G	A	0.5	G	A	0.3566	0.1434	6	32108243	MODIFIER	GRID2	ENSOARG00020021077	Transcript	ENSOART00020033391.2	protein_coding	-	4/15	-	-	-	-	-	-	-	-	G	G/A	-	-1	-	HGNC	HGNC:4576	-	-	-	-	-	-	-	-
OAR6_35488795.1	0.00919916	G	A	0.5	G	A	0.3566	0.1434	6	32108243	MODIFIER	GRID2	ENSOARG00020021077	Transcript	ENSOART00020033656.2	protein_coding	-	4/15	-	-	-	-	-	-	-	-	G	G/A	-	-1	-	HGNC	HGNC:4576	-	-	-	-	-	-	-	-
OAR6_35488795.1	0.00919916	G	A	0.5	G	A	0.3566	0.1434	6	32108243	MODIFIER	GRID2	ENSOARG00020021077	Transcript	ENSOART00020033681.2	protein_coding	-	3/14	-	-	-	-	-	-	-	-	G	G/A	-	-1	-	HGNC	HGNC:4576	-	-	-	-	-	-	-	-
Chr6:107900857	0.00920982	T	C	0.1867	T	C	0.297	0.1103	6	108993463	MODIFIER	-	-	-	-	-	-	-	-	-	-	-	-	-	-	-	T	T/C	-	-	-	-	-	-	-	-	-	-	-	-	-
oar3_OAR4_25080556	0.00922018	G	A	0.3343	G	A	0.4336	0.0993	4	25980536	MODIFIER	-	-	-	-	-	-	-	-	-	-	-	-	-	-	-	G	G/A	-	-	-	-	-	-	-	-	-	-	-	-	-
oar3_OAR3_52498587	0.00922557	G	A	0.4096	G	A	0.3134	0.0962	3	52644897	MODIFIER	-	-	-	-	-	-	-	-	-	-	-	-	-	-	-	G	G/A	-	-	-	-	-	-	-	-	-	-	-	-	-
OAR5_33142704.1	0.00927574	A	C	0.22	A	C	0.3115	0.0915	5	30302972	MODIFIER	-	-	-	-	-	-	-	-	-	-	-	-	-	-	rs402200039	A	A/C	-	-	-	-	-	-	-	-	-	-	-	-	-
OAR17_36180354.1	0.00928712	C	T	0.09337	C	T	0.1466	0.05323	17	33665702	MODIFIER	-	-	-	-	-	-	-	-	-	-	-	-	-	-	rs419729801	C	C/T	-	-	-	-	-	-	-	-	-	-	-	-	-
oar3_OAR16_13797928	0.00934414	T	C	0.486	C	T	0.4126	0.1014	16	13917123	MODIFIER	NLN	ENSOARG00020005037	Transcript	ENSOART00020008064.2	protein_coding	-	3/13	-	-	-	-	-	-	-	-	T	T/C	-	-1	-	HGNC	HGNC:16058	-	-	-	-	-	-	-	-
oar3_OAR16_13797928	0.00934414	T	C	0.486	C	T	0.4126	0.1014	16	13917123	MODIFIER	NLN	ENSOARG00020005037	Transcript	ENSOART00020008130.2	protein_coding	-	3/12	-	-	-	-	-	-	-	-	T	T/C	-	-1	-	HGNC	HGNC:16058	-	-	-	-	-	-	-	-
Chr7:33022595	0.00936026	T	C	0.1264	T	C	0.06643	0.05997	7	34211305	MODERATE	KNSTRN	ENSOARG00020011406	Transcript	ENSOART00020017427.2	protein_coding	5/9	-	-	-	716	622	208	S/P	Tca/Cca	-	T	T/C	-	1	-	HGNC	HGNC:30767	-	-	-	-	-	-	-	-
OAR3_12150564.1	0.00938516	A	G	0.4382	G	A	0.4685	0.0933	3	11634971	MODIFIER	-	-	-	-	-	-	-	-	-	-	-	-	-	-	-	A	A/G	-	-	-	-	-	-	-	-	-	-	-	-	-
oar3_OAR11_61375373	0.00941876	T	G	0.3596	T	G	0.4718	0.1122	11	61668512	MODIFIER	CEP112	ENSOARG00020009563	Transcript	ENSOART00020014986.2	protein_coding	-	6/15	-	-	-	-	-	-	-	-	T	T/G	-	-1	-	HGNC	HGNC:28514	-	-	-	-	-	-	-	-
Chr23:2571781	0.00943343	G	A	0.4185	G	A	0.3357	0.0828	23	2806703	MODIFIER	ZNF516	ENSOARG00020016047	Transcript	ENSOART00020024551.2	protein_coding	-	2/5	-	-	-	-	-	-	-	-	G	G/A	-	1	-	HGNC	HGNC:28990	-	-	-	-	-	-	-	-
Chr23:2571781	0.00943343	G	A	0.4185	G	A	0.3357	0.0828	23	2806703	MODIFIER	ZNF516	ENSOARG00020016047	Transcript	ENSOART00020024585.2	protein_coding	-	1/2	-	-	-	-	-	-	-	-	G	G/A	-	1	-	HGNC	HGNC:28990	-	-	-	-	-	-	-	-
OAR15_14326736.1	0.00945942	C	G	0.3904	C	G	0.4755	0.0851	15	14479810	MODIFIER	-	-	-	-	-	-	-	-	-	-	-	-	-	-	rs399333228	C	C/G	-	-	-	-	-	-	-	-	-	-	-	-	-
OAR25_19159330.1	0.00951979	G	A	0.2627	G	A	0.1748	0.0879	25	17815162	MODIFIER	-	-	-	-	-	-	-	-	-	-	-	-	-	-	-	G	G/A	-	-	-	-	-	-	-	-	-	-	-	-	-
OAR9_90632324.1	0.00955287	T	C	0.2191	T	C	0.1434	0.0757	9	85815455	MODIFIER	-	ENSOARG00020037903	Transcript	ENSOART00020042207.1	lncRNA	-	2/3	-	-	-	-	-	-	-	-	T	T/C	-	-1	-	-	-	-	-	-	-	-	-	-	-
OAR9_90632324.1	0.00955287	T	C	0.2191	T	C	0.1434	0.0757	9	85815455	MODIFIER	-	ENSOARG00020037903	Transcript	ENSOART00020056751.1	lncRNA	-	2/3	-	-	-	-	-	-	-	-	T	T/C	-	-1	-	-	-	-	-	-	-	-	-	-	-
oar3_OAR16_69998234	0.0095541	A	G	0.2809	A	G	0.3776	0.0967	16	70525897	MODIFIER	-	-	-	-	-	-	-	-	-	-	-	-	-	-	-	A	A/G	-	-	-	-	-	-	-	-	-	-	-	-	-
OAR3_221188082.1	0.00963769	G	A	0.2471	G	A	0.1519	0.0952	3	206048477	MODIFIER	-	-	-	-	-	-	-	-	-	-	-	-	-	-	-	G	G/A	-	-	-	-	-	-	-	-	-	-	-	-	-
s08934.1	0.00968875	G	A	0.4326	A	G	0.465	0.1024	1	179176051	MODIFIER	SIDT1	ENSOARG00020000920	Transcript	ENSOART00020001589.2	protein_coding	-	1/25	-	-	-	-	-	-	-	-	G	G/A	-	1	-	HGNC	HGNC:25967	-	-	-	-	-	-	-	-
s08934.1	0.00968875	G	A	0.4326	A	G	0.465	0.1024	1	179176051	MODIFIER	SIDT1	ENSOARG00020000920	Transcript	ENSOART00020001652.2	protein_coding	-	1/24	-	-	-	-	-	-	-	-	G	G/A	-	1	-	HGNC	HGNC:25967	-	-	-	-	-	-	-	-
oar3_OAR14_35458694	0.00972907	G	T	0.4326	G	T	0.3531	0.0795	14	35683302	MODIFIER	CDH1	ENSOARG00020008507	Transcript	ENSOART00020013072.2	protein_coding	-	15/15	-	-	-	-	-	-	-	-	G	G/T	-	1	-	Uniprot_gn	-	-	-	-	-	-	-	-	-
oar3_OAR14_35458694	0.00972907	G	T	0.4326	G	T	0.3531	0.0795	14	35683302	MODIFIER	CDH1	ENSOARG00020008507	Transcript	ENSOART00020013106.2	protein_coding	-	14/14	-	-	-	-	-	-	-	-	G	G/T	-	1	-	Uniprot_gn	-	-	-	-	-	-	-	-	-
oar3_OAR14_35458694	0.00972907	G	T	0.4326	G	T	0.3531	0.0795	14	35683302	MODIFIER	TANGO6	ENSOARG00020008610	Transcript	ENSOART00020013316.2	protein_coding	-	-	-	-	-	-	-	-	-	-	G	G/T	4806	1	-	HGNC	HGNC:25749	-	-	-	-	-	-	-	-
oar3_OAR14_35458694	0.00972907	G	T	0.4326	G	T	0.3531	0.0795	14	35683302	MODIFIER	TANGO6	ENSOARG00020008610	Transcript	ENSOART00020048133.1	protein_coding	-	-	-	-	-	-	-	-	-	-	G	G/T	4588	1	-	HGNC	HGNC:25749	-	-	-	-	-	-	-	-
OAR9_21423703.1	0.00973875	G	T	0.4494	T	G	0.4755	0.0751	9	20663462	MODIFIER	-	-	-	-	-	-	-	-	-	-	-	-	-	-	-	G	G/T	-	-	-	-	-	-	-	-	-	-	-	-	-
s56297.1	0.00974466	G	A	0.1489	G	A	0.09091	0.05799	24	7649922	MODIFIER	-	-	-	-	-	-	-	-	-	-	-	-	-	-	-	G	G/A	-	-	-	-	-	-	-	-	-	-	-	-	-
s16480.1	0.00981213	T	C	0.3708	T	C	0.4825	0.1117	7	28473952	MODIFIER	ACTC1	ENSOARG00020005856	Transcript	ENSOART00020009063.2	protein_coding	-	5/6	-	-	-	-	-	-	-	rs401184731	T	T/C	-	-1	-	HGNC	HGNC:143	-	-	-	-	-	-	-	-
s22496.1	0.00981355	A	G	0.1489	A	G	0.08392	0.06498	3	144215937	MODIFIER	-	-	-	-	-	-	-	-	-	-	-	-	-	-	rs407052615	A	A/G	-	-	-	-	-	-	-	-	-	-	-	-	-
oar3_OAR16_20190208	0.00982235	T	C	0.4466	C	T	0.4336	0.1198	16	20325539	MODIFIER	PDE4D	ENSOARG00020007357	Transcript	ENSOART00020012677.2	protein_coding	-	3/14	-	-	-	-	-	-	-	-	T	T/C	-	1	-	HGNC	HGNC:8783	-	-	-	-	-	-	-	-
oar3_OAR16_20190208	0.00982235	T	C	0.4466	C	T	0.4336	0.1198	16	20325539	MODIFIER	PDE4D	ENSOARG00020007357	Transcript	ENSOART00020012859.2	protein_coding	-	3/14	-	-	-	-	-	-	-	-	T	T/C	-	1	-	HGNC	HGNC:8783	-	-	-	-	-	-	-	-
OAR3_47595933.1	0.00982434	C	T	0.4663	C	T	0.3636	0.1027	3	44700022	MODIFIER	-	ENSOARG00020030604	Transcript	ENSOART00020073270.1	protein_coding	-	1/1	-	-	-	-	-	-	-	rs418457469	C	C/T	-	1	-	-	-	-	-	-	-	-	-	-	-
OAR3_47595933.1	0.00982434	C	T	0.4663	C	T	0.3636	0.1027	3	44700022	MODIFIER	MDH1	ENSOARG00020001156	Transcript	ENSOART00020001756.2	protein_coding	-	2/6	-	-	-	-	-	-	-	rs418457469	C	C/T	-	-1	-	HGNC	HGNC:6970	-	-	-	-	-	-	-	-
OAR3_47595933.1	0.00982434	C	T	0.4663	C	T	0.3636	0.1027	3	44700022	MODIFIER	MDH1	ENSOARG00020001156	Transcript	ENSOART00020001764.2	protein_coding	-	1/5	-	-	-	-	-	-	-	rs418457469	C	C/T	-	-1	-	HGNC	HGNC:6970	-	-	-	-	-	-	-	-
OAR3_47595933.1	0.00982434	C	T	0.4663	C	T	0.3636	0.1027	3	44700022	MODIFIER	MDH1	ENSOARG00020001156	Transcript	ENSOART00020001801.2	protein_coding	-	5/7	-	-	-	-	-	-	-	rs418457469	C	C/T	-	-1	-	HGNC	HGNC:6970	-	-	-	-	-	-	-	-
OAR3_47595933.1	0.00982434	C	T	0.4663	C	T	0.3636	0.1027	3	44700022	MODIFIER	MDH1	ENSOARG00020001156	Transcript	ENSOART00020061310.1	protein_coding	-	5/9	-	-	-	-	-	-	-	rs418457469	C	C/T	-	-1	-	HGNC	HGNC:6970	-	-	-	-	-	-	-	-
OAR3_47595933.1	0.00982434	C	T	0.4663	C	T	0.3636	0.1027	3	44700022	MODIFIER	MDH1	ENSOARG00020001156	Transcript	ENSOART00020063488.1	protein_coding	-	6/10	-	-	-	-	-	-	-	rs418457469	C	C/T	-	-1	-	HGNC	HGNC:6970	-	-	-	-	-	-	-	-
OAR3_47595933.1	0.00982434	C	T	0.4663	C	T	0.3636	0.1027	3	44700022	MODIFIER	WDPCP	ENSOARG00020001233	Transcript	ENSOART00020001844.2	protein_coding	-	1/13	-	-	-	-	-	-	-	rs418457469	C	C/T	-	1	-	HGNC	HGNC:28027	-	-	-	-	-	-	-	-
OAR4_8687452.1	0.00983274	A	G	0.441	A	G	0.3322	0.1088	4	9490073	MODIFIER	-	-	-	-	-	-	-	-	-	-	-	-	-	-	rs417419919	A	A/G	-	-	-	-	-	-	-	-	-	-	-	-	-
OAR2_255522093.1	0.00983284	C	T	0.4213	T	C	0.4336	0.1451	2	242500684	MODIFIER	IL22RA1	ENSOARG00020012141	Transcript	ENSOART00020018572.2	protein_coding	-	-	-	-	-	-	-	-	-	-	C	C/T	2121	1	-	HGNC	HGNC:13700	-	-	-	-	-	-	-	-
oar3_OAR2_155101525	0.00984878	C	A	0.435	A	C	0.4542	0.1108	2	156288430	MODIFIER	-	-	-	-	-	-	-	-	-	-	-	-	-	-	-	C	C/A	-	-	-	-	-	-	-	-	-	-	-	-	-
s19292.1	0.00987569	A	G	0.3736	A	G	0.2657	0.1079	12	36420412	MODIFIER	-	ENSOARG00020033618	Transcript	ENSOART00020045573.1	protein_coding	-	-	-	-	-	-	-	-	-	rs425825810	A	A/G	4962	1	-	-	-	-	-	-	-	-	-	-	-
s19292.1	0.00987569	A	G	0.3736	A	G	0.2657	0.1079	12	36420412	MODIFIER	-	ENSOARG00020033618	Transcript	ENSOART00020061769.1	protein_coding	-	-	-	-	-	-	-	-	-	rs425825810	A	A/G	4793	1	-	-	-	-	-	-	-	-	-	-	-
oar3_OAR14_40743365	0.00989107	A	C	0.25	A	C	0.3636	0.1136	14	40955463	MODIFIER	-	-	-	-	-	-	-	-	-	-	-	-	-	-	rs427595957	A	A/C	-	-	-	-	-	-	-	-	-	-	-	-	-
oar3_OAR12_36055643	0.0099353	A	G	0.2219	A	G	0.3252	0.1033	12	37177557	MODIFIER	-	-	-	-	-	-	-	-	-	-	-	-	-	-	rs401606372	A	A/G	-	-	-	-	-	-	-	-	-	-	-	-	-
oar3_OAR25_42809513	0.00994696	G	T	0.2388	G	T	0.1469	0.0919	25	42217152	MODIFIER	LRRC18	ENSOARG00020026451	Transcript	ENSOART00020041620.2	protein_coding	-	1/2	-	-	-	-	-	-	-	-	G	G/T	-	-1	-	HGNC	HGNC:23199	-	-	-	-	-	-	-	-
oar3_OAR25_42809513	0.00994696	G	T	0.2388	G	T	0.1469	0.0919	25	42217152	MODIFIER	WDFY4	ENSOARG00020026448	Transcript	ENSOART00020041614.2	protein_coding	-	47/61	-	-	-	-	-	-	-	-	G	G/T	-	1	-	HGNC	HGNC:29323	-	-	-	-	-	-	-	-
oar3_OAR25_42809513	0.00994696	G	T	0.2388	G	T	0.1469	0.0919	25	42217152	MODIFIER	WDFY4	ENSOARG00020026448	Transcript	ENSOART00020041616.2	protein_coding	-	47/49	-	-	-	-	-	-	-	-	G	G/T	-	1	-	HGNC	HGNC:29323	-	-	-	-	-	-	-	-
oar3_OAR15_14557347	0.00998232	A	G	0.4719	G	A	0.4231	0.105	15	14706242	MODIFIER	-	ENSOARG00020027950	Transcript	ENSOART00020072818.1	protein_coding	-	1/1	-	-	-	-	-	-	-	-	A	A/G	-	-1	-	-	-	-	-	-	-	-	-	-	-
Chr11:52395729	0.0100291	C	A	0.3364	C	A	0.4436	0.1072	11	52743043	MODIFIER	CANT1	ENSOARG00020012223	Transcript	ENSOART00020018660.2	protein_coding	-	4/4	-	-	-	-	-	-	-	-	C	C/A	-	1	-	HGNC	HGNC:19721	-	-	-	-	-	-	-	-
Chr11:52395729	0.0100291	C	A	0.3364	C	A	0.4436	0.1072	11	52743043	MODIFIER	CANT1	ENSOARG00020012223	Transcript	ENSOART00020048475.1	protein_coding	-	5/5	-	-	-	-	-	-	-	-	C	C/A	-	1	-	HGNC	HGNC:19721	-	-	-	-	-	-	-	-
Chr11:52395729	0.0100291	C	A	0.3364	C	A	0.4436	0.1072	11	52743043	MODIFIER	CANT1	ENSOARG00020012223	Transcript	ENSOART00020077709.1	protein_coding	-	5/5	-	-	-	-	-	-	-	-	C	C/A	-	1	-	HGNC	HGNC:19721	-	-	-	-	-	-	-	-
OAR6_108778269.1	0.010044	T	C	0.4972	T	C	0.3951	0.1021	6	99881132	MODIFIER	-	-	-	-	-	-	-	-	-	-	-	-	-	-	-	T	T/C	-	-	-	-	-	-	-	-	-	-	-	-	-
OAR12_64858268.1	0.0100688	A	G	0.3034	A	G	0.4231	0.1197	12	59809822	MODIFIER	FAM20B	ENSOARG00020026589	Transcript	ENSOART00020048512.1	protein_coding	-	4/9	-	-	-	-	-	-	-	rs429090604	A	A/G	-	1	-	HGNC	HGNC:23017	-	-	-	-	-	-	-	-
s12546.1	0.0101249	C	T	0.3898	C	T	0.4858	0.096	11	34778174	MODIFIER	MPRIP	ENSOARG00020026217	Transcript	ENSOART00020041254.2	protein_coding	-	1/22	-	-	-	-	-	-	-	-	C	C/T	-	-1	-	HGNC	HGNC:30321	-	-	-	-	-	-	-	-
s12546.1	0.0101249	C	T	0.3898	C	T	0.4858	0.096	11	34778174	MODIFIER	MPRIP	ENSOARG00020026217	Transcript	ENSOART00020042286.1	protein_coding	-	1/22	-	-	-	-	-	-	-	-	C	C/T	-	-1	-	HGNC	HGNC:30321	-	-	-	-	-	-	-	-
s12546.1	0.0101249	C	T	0.3898	C	T	0.4858	0.096	11	34778174	MODIFIER	MPRIP	ENSOARG00020026217	Transcript	ENSOART00020054729.1	protein_coding	-	1/23	-	-	-	-	-	-	-	-	C	C/T	-	-1	-	HGNC	HGNC:30321	-	-	-	-	-	-	-	-
s12546.1	0.0101249	C	T	0.3898	C	T	0.4858	0.096	11	34778174	MODIFIER	MPRIP	ENSOARG00020026217	Transcript	ENSOART00020061300.1	protein_coding	-	1/23	-	-	-	-	-	-	-	-	C	C/T	-	-1	-	HGNC	HGNC:30321	-	-	-	-	-	-	-	-
OAR18_11985596.1	0.0101704	A	G	0.3983	A	G	0.2679	0.1304	18	12279756	MODIFIER	-	-	-	-	-	-	-	-	-	-	-	-	-	-	-	A	A/G	-	-	-	-	-	-	-	-	-	-	-	-	-
oar3_OAR6_31189563	0.0102916	T	C	0.4037	T	C	0.2638	0.1399	6	31850488	MODIFIER	GRID2	ENSOARG00020021077	Transcript	ENSOART00020033391.2	protein_coding	-	8/15	-	-	-	-	-	-	-	-	T	T/C	-	-1	-	HGNC	HGNC:4576	-	-	-	-	-	-	-	-
oar3_OAR6_31189563	0.0102916	T	C	0.4037	T	C	0.2638	0.1399	6	31850488	MODIFIER	GRID2	ENSOARG00020021077	Transcript	ENSOART00020033656.2	protein_coding	-	8/15	-	-	-	-	-	-	-	-	T	T/C	-	-1	-	HGNC	HGNC:4576	-	-	-	-	-	-	-	-
oar3_OAR6_31189563	0.0102916	T	C	0.4037	T	C	0.2638	0.1399	6	31850488	MODIFIER	GRID2	ENSOARG00020021077	Transcript	ENSOART00020033681.2	protein_coding	-	7/14	-	-	-	-	-	-	-	-	T	T/C	-	-1	-	HGNC	HGNC:4576	-	-	-	-	-	-	-	-
OAR3_36930752.1	0.0102937	A	G	0.3657	A	G	0.4789	0.1132	3	34628515	MODIFIER	-	ENSOARG00020007603	Transcript	ENSOART00020041342.2	protein_coding	-	-	-	-	-	-	-	-	-	-	A	A/G	2892	1	-	-	-	-	-	-	-	-	-	-	-
OAR3_36930752.1	0.0102937	A	G	0.3657	A	G	0.4789	0.1132	3	34628515	MODIFIER	-	ENSOARG00020007603	Transcript	ENSOART00020057748.1	protein_coding	-	-	-	-	-	-	-	-	-	-	A	A/G	2596	1	-	-	-	-	-	-	-	-	-	-	-
OAR3_36930752.1	0.0102937	A	G	0.3657	A	G	0.4789	0.1132	3	34628515	MODIFIER	ZNF512	ENSOARG00020002439	Transcript	ENSOART00020005394.2	protein_coding	-	11/13	-	-	-	-	-	-	-	-	A	A/G	-	1	-	Uniprot_gn	-	-	-	-	-	-	-	-	-
OAR3_36930752.1	0.0102937	A	G	0.3657	A	G	0.4789	0.1132	3	34628515	MODIFIER	ZNF512	ENSOARG00020002439	Transcript	ENSOART00020005558.2	protein_coding	-	11/12	-	-	-	-	-	-	-	-	A	A/G	-	1	-	Uniprot_gn	-	-	-	-	-	-	-	-	-
Chr12:58508392	0.0103009	A	T	0.2627	A	T	0.3679	0.1052	12	59840863	MODIFIER	FAM20B	ENSOARG00020026589	Transcript	ENSOART00020048512.1	protein_coding	-	-	-	-	-	-	-	-	-	rs160802097	A	A/T	2671	1	-	HGNC	HGNC:23017	-	-	-	-	-	-	-	-
Chr12:58508392	0.0103009	A	T	0.2627	A	T	0.3679	0.1052	12	59840863	MODIFIER	FAM20B	ENSOARG00020026589	Transcript	ENSOART00020050427.1	protein_coding	-	-	-	-	-	-	-	-	-	rs160802097	A	A/T	2659	1	-	HGNC	HGNC:23017	-	-	-	-	-	-	-	-
Chr12:58508392	0.0103009	A	T	0.2627	A	T	0.3679	0.1052	12	59840863	MODERATE	TOR3A	ENSOARG00020021034	Transcript	ENSOART00020032467.2	protein_coding	1/6	-	-	-	303	206	69	Y/F	tAc/tTc	rs160802097	A	A/T	-	1	-	HGNC	HGNC:11997	-	-	-	-	tolerated(0.65)	-	-	-
oar3_OAR8_44061450	0.0104882	C	T	0.4298	C	T	0.3287	0.1011	8	44243712	MODIFIER	-	-	-	-	-	-	-	-	-	-	-	-	-	-	rs415592717	C	C/T	-	-	-	-	-	-	-	-	-	-	-	-	-
OAR8_47526968.1	0.0104882	T	C	0.4298	T	C	0.3287	0.1011	8	44243689	MODIFIER	-	-	-	-	-	-	-	-	-	-	-	-	-	-	rs407743254	T	T/C	-	-	-	-	-	-	-	-	-	-	-	-	-
oar3_OAR24_7856853	0.0104952	C	T	0.486	T	C	0.4021	0.1119	24	8400214	MODIFIER	U6	ENSOARG00020014714	Transcript	ENSOART00020022486.2	snRNA	-	-	-	-	-	-	-	-	-	rs422113697	C	C/T	2010	1	-	RFAM	-	-	-	-	-	-	-	-	-
OAR8_64933647.1	0.0105282	A	G	0.1994	A	G	0.3042	0.1048	8	60538025	MODIFIER	-	-	-	-	-	-	-	-	-	-	-	-	-	-	rs410635571	A	A/G	-	-	-	-	-	-	-	-	-	-	-	-	-
OAR16_39143709.1	0.0105508	G	T	0.4073	G	T	0.2972	0.1101	16	36169638	MODIFIER	EGFLAM	ENSOARG00020011103	Transcript	ENSOART00020016976.2	protein_coding	-	12/22	-	-	-	-	-	-	-	-	G	G/T	-	-1	-	HGNC	HGNC:26810	-	-	-	-	-	-	-	-
OAR16_39143709.1	0.0105508	G	T	0.4073	G	T	0.2972	0.1101	16	36169638	MODIFIER	EGFLAM	ENSOARG00020011103	Transcript	ENSOART00020017198.2	protein_coding	-	11/22	-	-	-	-	-	-	-	-	G	G/T	-	-1	-	HGNC	HGNC:26810	-	-	-	-	-	-	-	-
OAR16_39143709.1	0.0105508	G	T	0.4073	G	T	0.2972	0.1101	16	36169638	MODIFIER	EGFLAM	ENSOARG00020011103	Transcript	ENSOART00020017287.2	protein_coding	-	7/17	-	-	-	-	-	-	-	-	G	G/T	-	-1	-	HGNC	HGNC:26810	-	-	-	-	-	-	-	-
OAR16_39143709.1	0.0105508	G	T	0.4073	G	T	0.2972	0.1101	16	36169638	MODIFIER	EGFLAM	ENSOARG00020011103	Transcript	ENSOART00020017563.2	protein_coding	-	11/21	-	-	-	-	-	-	-	-	G	G/T	-	-1	-	HGNC	HGNC:26810	-	-	-	-	-	-	-	-
OAR16_39143709.1	0.0105508	G	T	0.4073	G	T	0.2972	0.1101	16	36169638	MODIFIER	EGFLAM	ENSOARG00020011103	Transcript	ENSOART00020017774.2	protein_coding	-	6/16	-	-	-	-	-	-	-	-	G	G/T	-	-1	-	HGNC	HGNC:26810	-	-	-	-	-	-	-	-
oar3_OAR24_11054705	0.0106278	G	A	0.441	G	A	0.3322	0.1088	24	11580915	MODIFIER	SNX29	ENSOARG00020018416	Transcript	ENSOART00020028346.2	protein_coding	-	17/21	-	-	-	-	-	-	-	-	G	G/A	-	1	-	HGNC	HGNC:30542	-	-	-	-	-	-	-	-
oar3_OAR24_11054705	0.0106278	G	A	0.441	G	A	0.3322	0.1088	24	11580915	MODIFIER	SNX29	ENSOARG00020018416	Transcript	ENSOART00020028520.2	protein_coding	-	16/21	-	-	-	-	-	-	-	-	G	G/A	-	1	-	HGNC	HGNC:30542	-	-	-	-	-	-	-	-
oar3_OAR24_11054705	0.0106278	G	A	0.441	G	A	0.3322	0.1088	24	11580915	MODIFIER	SNX29	ENSOARG00020018416	Transcript	ENSOART00020028674.2	protein_coding	-	16/20	-	-	-	-	-	-	-	-	G	G/A	-	1	-	HGNC	HGNC:30542	-	-	-	-	-	-	-	-
oar3_OAR24_11054705	0.0106278	G	A	0.441	G	A	0.3322	0.1088	24	11580915	MODIFIER	SNX29	ENSOARG00020018416	Transcript	ENSOART00020028771.2	protein_coding	-	16/18	-	-	-	-	-	-	-	-	G	G/A	-	1	-	HGNC	HGNC:30542	-	-	-	-	-	-	-	-
s18520.1	0.0106278	A	G	0.441	A	G	0.3322	0.1088	24	11582249	MODIFIER	SNX29	ENSOARG00020018416	Transcript	ENSOART00020028346.2	protein_coding	-	17/21	-	-	-	-	-	-	-	-	A	A/G	-	1	-	HGNC	HGNC:30542	-	-	-	-	-	-	-	-
s18520.1	0.0106278	A	G	0.441	A	G	0.3322	0.1088	24	11582249	MODIFIER	SNX29	ENSOARG00020018416	Transcript	ENSOART00020028520.2	protein_coding	-	16/21	-	-	-	-	-	-	-	-	A	A/G	-	1	-	HGNC	HGNC:30542	-	-	-	-	-	-	-	-
s18520.1	0.0106278	A	G	0.441	A	G	0.3322	0.1088	24	11582249	MODIFIER	SNX29	ENSOARG00020018416	Transcript	ENSOART00020028674.2	protein_coding	-	16/20	-	-	-	-	-	-	-	-	A	A/G	-	1	-	HGNC	HGNC:30542	-	-	-	-	-	-	-	-
s18520.1	0.0106278	A	G	0.441	A	G	0.3322	0.1088	24	11582249	MODIFIER	SNX29	ENSOARG00020018416	Transcript	ENSOART00020028771.2	protein_coding	-	16/18	-	-	-	-	-	-	-	-	A	A/G	-	1	-	HGNC	HGNC:30542	-	-	-	-	-	-	-	-
OAR2_82865720.1	0.0106449	A	G	0.4101	A	G	0.3042	0.1059	2	78272393	MODIFIER	-	ENSOARG00020027579	Transcript	ENSOART00020051237.1	protein_coding	-	3/3	-	-	-	-	-	-	-	-	A	A/G	-	-1	-	-	-	-	-	-	-	-	-	-	-
OAR2_82865720.1	0.0106449	A	G	0.4101	A	G	0.3042	0.1059	2	78272393	MODIFIER	-	ENSOARG00020031065	Transcript	ENSOART00020057038.1	protein_coding	-	1/2	-	-	-	-	-	-	-	-	A	A/G	-	-1	-	-	-	-	-	-	-	-	-	-	-
oar3_OAR18_64688755	0.0106766	T	G	0.4045	T	G	0.2872	0.1173	18	63626509	MODIFIER	-	-	-	-	-	-	-	-	-	-	-	-	-	-	-	T	T/G	-	-	-	-	-	-	-	-	-	-	-	-	-
Chr3:51257640	0.0107058	A	G	0.3315	A	G	0.2308	0.1007	3	51409129	MODIFIER	CTNNA2	ENSOARG00020002405	Transcript	ENSOART00020003754.2	protein_coding	-	7/18	-	-	-	-	-	-	-	-	A	A/G	-	1	-	HGNC	HGNC:2510	-	-	-	-	-	-	-	-
Chr3:51257640	0.0107058	A	G	0.3315	A	G	0.2308	0.1007	3	51409129	MODIFIER	CTNNA2	ENSOARG00020002405	Transcript	ENSOART00020003758.2	protein_coding	-	7/17	-	-	-	-	-	-	-	-	A	A/G	-	1	-	HGNC	HGNC:2510	-	-	-	-	-	-	-	-
Chr3:51257640	0.0107058	A	G	0.3315	A	G	0.2308	0.1007	3	51409129	MODIFIER	CTNNA2	ENSOARG00020002405	Transcript	ENSOART00020003769.2	protein_coding	-	7/16	-	-	-	-	-	-	-	-	A	A/G	-	1	-	HGNC	HGNC:2510	-	-	-	-	-	-	-	-
Chr3:51257640	0.0107058	A	G	0.3315	A	G	0.2308	0.1007	3	51409129	MODIFIER	CTNNA2	ENSOARG00020002405	Transcript	ENSOART00020003790.2	protein_coding	-	7/18	-	-	-	-	-	-	-	-	A	A/G	-	1	-	HGNC	HGNC:2510	-	-	-	-	-	-	-	-
Chr3:51257640	0.0107058	A	G	0.3315	A	G	0.2308	0.1007	3	51409129	MODIFIER	CTNNA2	ENSOARG00020002405	Transcript	ENSOART00020003800.2	protein_coding	-	7/19	-	-	-	-	-	-	-	-	A	A/G	-	1	-	HGNC	HGNC:2510	-	-	-	-	-	-	-	-
Chr3:51257640	0.0107058	A	G	0.3315	A	G	0.2308	0.1007	3	51409129	MODIFIER	CTNNA2	ENSOARG00020002405	Transcript	ENSOART00020003831.2	protein_coding	-	6/17	-	-	-	-	-	-	-	-	A	A/G	-	1	-	HGNC	HGNC:2510	-	-	-	-	-	-	-	-
OAR24_22917633.1	0.0107399	A	C	0.25	A	C	0.3486	0.0986	24	21701311	MODIFIER	-	ENSOARG00020030880	Transcript	ENSOART00020081592.1	lncRNA	1/2	-	-	-	596	-	-	-	-	rs422139044	A	A/C	-	-1	-	-	-	-	-	-	-	-	-	-	-
OAR24_22917633.1	0.0107399	A	C	0.25	A	C	0.3486	0.0986	24	21701311	MODIFIER	GGA2	ENSOARG00020024785	Transcript	ENSOART00020038804.2	protein_coding	-	-	-	-	-	-	-	-	-	rs422139044	A	A/C	2321	-1	-	HGNC	HGNC:16064	-	-	-	-	-	-	-	-
OAR24_22917633.1	0.0107399	A	C	0.25	A	C	0.3486	0.0986	24	21701311	MODIFIER	GGA2	ENSOARG00020024785	Transcript	ENSOART00020059379.1	protein_coding	-	-	-	-	-	-	-	-	-	rs422139044	A	A/C	2337	-1	-	HGNC	HGNC:16064	-	-	-	-	-	-	-	-
s28247.1	0.010769	T	C	0.2472	T	C	0.3497	0.1025	12	76714250	MODIFIER	-	-	-	-	-	-	-	-	-	-	-	-	-	-	-	T	T/C	-	-	-	-	-	-	-	-	-	-	-	-	-
oar3_OAR22_200310	0.0108182	A	G	0.4209	A	G	0.2993	0.1216	22	214286	MODIFIER	-	-	-	-	-	-	-	-	-	-	-	-	-	-	-	A	A/G	-	-	-	-	-	-	-	-	-	-	-	-	-
s11365.1	0.0108772	A	G	0.3736	A	G	0.472	0.0984	6	19664191	MODIFIER	-	ENSOARG00020025850	Transcript	ENSOART00020040632.2	scaRNA	-	-	-	-	-	-	-	-	-	rs412262222	A	A/G	1627	-1	-	-	-	-	-	-	-	-	-	-	-
oar3_OAR17_58933541	0.0108781	A	G	0.309	A	G	0.2028	0.1062	17	59365920	MODIFIER	-	-	-	-	-	-	-	-	-	-	-	-	-	-	rs428754999	A	A/G	-	-	-	-	-	-	-	-	-	-	-	-	-
oar3_OAR2_241902034	0.0109503	C	T	0.441	C	T	0.3077	0.1333	2	242752500	MODIFIER	CNR2	ENSOARG00020012960	Transcript	ENSOART00020050881.1	protein_coding	-	1/3	-	-	-	-	-	-	-	-	C	C/T	-	1	-	HGNC	HGNC:2160	-	-	-	-	-	-	-	-
oar3_OAR2_241902034	0.0109503	C	T	0.441	C	T	0.3077	0.1333	2	242752500	MODIFIER	CNR2	ENSOARG00020012960	Transcript	ENSOART00020055128.1	protein_coding	-	1/2	-	-	-	-	-	-	-	-	C	C/T	-	1	-	HGNC	HGNC:2160	-	-	-	-	-	-	-	-
oar3_OAR2_241902034	0.0109503	C	T	0.441	C	T	0.3077	0.1333	2	242752500	MODIFIER	CNR2	ENSOARG00020012960	Transcript	ENSOART00020056283.1	protein_coding	-	1/3	-	-	-	-	-	-	-	-	C	C/T	-	1	-	HGNC	HGNC:2160	-	-	-	-	-	-	-	-
oar3_OAR2_241902034	0.0109503	C	T	0.441	C	T	0.3077	0.1333	2	242752500	MODIFIER	CNR2	ENSOARG00020012960	Transcript	ENSOART00020063445.1	protein_coding	-	1/2	-	-	-	-	-	-	-	-	C	C/T	-	1	-	HGNC	HGNC:2160	-	-	-	-	-	-	-	-
OAR26_40820405.1	0.0109861	G	A	0.3202	G	A	0.4231	0.1029	26	36717169	MODIFIER	-	-	-	-	-	-	-	-	-	-	-	-	-	-	-	G	G/A	-	-	-	-	-	-	-	-	-	-	-	-	-
oar3_OAR2_170764327	0.0110845	G	T	0.4101	T	G	0.493	0.0969	2	171925343	MODIFIER	NXPH2	ENSOARG00020011226	Transcript	ENSOART00020017098.2	protein_coding	-	1/1	-	-	-	-	-	-	-	-	G	G/T	-	1	-	HGNC	HGNC:8076	-	-	-	-	-	-	-	-
oar3_OAR2_170764327	0.0110845	G	T	0.4101	T	G	0.493	0.0969	2	171925343	MODIFIER	NXPH2	ENSOARG00020011226	Transcript	ENSOART00020057239.1	protein_coding	-	1/1	-	-	-	-	-	-	-	-	G	G/T	-	1	-	HGNC	HGNC:8076	-	-	-	-	-	-	-	-
OAR16_36249607.1	0.0111392	A	G	0.3665	A	G	0.2553	0.1112	16	33572110	MODIFIER	C6	ENSOARG00020007044	Transcript	ENSOART00020011156.2	protein_coding	-	-	-	-	-	-	-	-	-	rs418606130	A	A/G	355	1	-	HGNC	HGNC:1339	-	-	-	-	-	-	-	-
OAR6_35147494.1	0.0112196	C	T	0.4747	C	T	0.3357	0.139	6	31847254	MODIFIER	GRID2	ENSOARG00020021077	Transcript	ENSOART00020033391.2	protein_coding	-	8/15	-	-	-	-	-	-	-	-	C	C/T	-	-1	-	HGNC	HGNC:4576	-	-	-	-	-	-	-	-
OAR6_35147494.1	0.0112196	C	T	0.4747	C	T	0.3357	0.139	6	31847254	MODIFIER	GRID2	ENSOARG00020021077	Transcript	ENSOART00020033656.2	protein_coding	-	8/15	-	-	-	-	-	-	-	-	C	C/T	-	-1	-	HGNC	HGNC:4576	-	-	-	-	-	-	-	-
OAR6_35147494.1	0.0112196	C	T	0.4747	C	T	0.3357	0.139	6	31847254	MODIFIER	GRID2	ENSOARG00020021077	Transcript	ENSOART00020033681.2	protein_coding	-	7/14	-	-	-	-	-	-	-	-	C	C/T	-	-1	-	HGNC	HGNC:4576	-	-	-	-	-	-	-	-
s33830.1	0.0112653	C	T	0.4888	T	C	0.3986	0.1126	4	111780110	MODIFIER	CNTNAP2	ENSOARG00020006838	Transcript	ENSOART00020010769.2	protein_coding	-	9/23	-	-	-	-	-	-	-	rs411211111	C	C/T	-	1	-	HGNC	HGNC:13830	-	-	-	-	-	-	-	-
s33830.1	0.0112653	C	T	0.4888	T	C	0.3986	0.1126	4	111780110	MODIFIER	CNTNAP2	ENSOARG00020006838	Transcript	ENSOART00020010943.2	protein_coding	-	10/24	-	-	-	-	-	-	-	rs411211111	C	C/T	-	1	-	HGNC	HGNC:13830	-	-	-	-	-	-	-	-
s33830.1	0.0112653	C	T	0.4888	T	C	0.3986	0.1126	4	111780110	MODIFIER	CNTNAP2	ENSOARG00020006838	Transcript	ENSOART00020011012.2	protein_coding	-	9/22	-	-	-	-	-	-	-	rs411211111	C	C/T	-	1	-	HGNC	HGNC:13830	-	-	-	-	-	-	-	-
s33830.1	0.0112653	C	T	0.4888	T	C	0.3986	0.1126	4	111780110	MODIFIER	CNTNAP2	ENSOARG00020006838	Transcript	ENSOART00020011124.2	protein_coding	-	8/22	-	-	-	-	-	-	-	rs411211111	C	C/T	-	1	-	HGNC	HGNC:13830	-	-	-	-	-	-	-	-
s33830.1	0.0112653	C	T	0.4888	T	C	0.3986	0.1126	4	111780110	MODIFIER	CNTNAP2	ENSOARG00020006838	Transcript	ENSOART00020063269.1	protein_coding	-	9/23	-	-	-	-	-	-	-	rs411211111	C	C/T	-	1	-	HGNC	HGNC:13830	-	-	-	-	-	-	-	-
Chr18:64593126	0.0113708	G	A	0.2275	G	A	0.1197	0.1078	18	63530864	MODIFIER	-	ENSOARG00020010093	Transcript	ENSOART00020015425.2	snoRNA	-	-	-	-	-	-	-	-	-	-	G	G/A	3809	1	-	-	-	-	-	-	-	-	-	-	-
Chr18:64593126	0.0113708	G	A	0.2275	G	A	0.1197	0.1078	18	63530864	MODIFIER	-	ENSOARG00020010102	Transcript	ENSOART00020015450.2	snoRNA	-	-	-	-	-	-	-	-	-	-	G	G/A	4807	1	-	-	-	-	-	-	-	-	-	-	-
Chr18:64593126	0.0113708	G	A	0.2275	G	A	0.1197	0.1078	18	63530864	MODIFIER	-	ENSOARG00020019158	Transcript	ENSOART00020029427.2	snoRNA	-	-	-	-	-	-	-	-	-	-	G	G/A	4881	1	-	-	-	-	-	-	-	-	-	-	-
Chr18:64593126	0.0113708	G	A	0.2275	G	A	0.1197	0.1078	18	63530864	MODIFIER	-	ENSOARG00020019176	Transcript	ENSOART00020029447.2	snoRNA	-	-	-	-	-	-	-	-	-	-	G	G/A	4255	1	-	-	-	-	-	-	-	-	-	-	-
Chr18:64593126	0.0113708	G	A	0.2275	G	A	0.1197	0.1078	18	63530864	MODIFIER	-	ENSOARG00020019189	Transcript	ENSOART00020029477.2	snoRNA	-	-	-	-	-	-	-	-	-	-	G	G/A	3308	1	-	-	-	-	-	-	-	-	-	-	-
Chr18:64593126	0.0113708	G	A	0.2275	G	A	0.1197	0.1078	18	63530864	MODIFIER	-	ENSOARG00020019201	Transcript	ENSOART00020029496.2	snoRNA	-	-	-	-	-	-	-	-	-	-	G	G/A	1459	1	-	-	-	-	-	-	-	-	-	-	-
Chr18:64593126	0.0113708	G	A	0.2275	G	A	0.1197	0.1078	18	63530864	MODIFIER	-	ENSOARG00020019215	Transcript	ENSOART00020029514.2	snoRNA	-	-	-	-	-	-	-	-	-	-	G	G/A	1096	1	-	-	-	-	-	-	-	-	-	-	-
Chr18:64593126	0.0113708	G	A	0.2275	G	A	0.1197	0.1078	18	63530864	MODIFIER	-	ENSOARG00020019233	Transcript	ENSOART00020029537.2	snoRNA	-	-	-	-	-	-	-	-	-	-	G	G/A	1903	1	-	-	-	-	-	-	-	-	-	-	-
Chr18:64593126	0.0113708	G	A	0.2275	G	A	0.1197	0.1078	18	63530864	MODIFIER	MIR3955	ENSOARG00020010082	Transcript	ENSOART00020015413.2	miRNA	-	-	-	-	-	-	-	-	-	-	G	G/A	3784	1	-	EntrezGene	-	-	-	-	-	-	-	-	-
oar3_OAR3_147274405	0.011393	C	T	0.4073	C	T	0.3042	0.1031	3	147530425	MODIFIER	SLC2A13	ENSOARG00020001221	Transcript	ENSOART00020001832.2	protein_coding	-	6/10	-	-	-	-	-	-	-	rs409593734	C	C/T	-	1	-	Uniprot_gn	-	-	-	-	-	-	-	-	-
oar3_OAR3_147274405	0.011393	C	T	0.4073	C	T	0.3042	0.1031	3	147530425	MODIFIER	SLC2A13	ENSOARG00020001221	Transcript	ENSOART00020057946.1	protein_coding	-	7/11	-	-	-	-	-	-	-	rs409593734	C	C/T	-	1	-	Uniprot_gn	-	-	-	-	-	-	-	-	-
oar3_OAR6_89100102	0.011547	T	C	0.4972	T	C	0.3916	0.1056	6	90175319	MODIFIER	-	-	-	-	-	-	-	-	-	-	-	-	-	-	-	T	T/C	-	-	-	-	-	-	-	-	-	-	-	-	-
OAR3_157120255.1	0.0115699	A	G	0.382	A	G	0.2797	0.1023	3	147514805	MODIFIER	SLC2A13	ENSOARG00020001221	Transcript	ENSOART00020001832.2	protein_coding	-	5/10	-	-	-	-	-	-	-	rs417629505	A	A/G	-	1	-	Uniprot_gn	-	-	-	-	-	-	-	-	-
OAR3_157120255.1	0.0115699	A	G	0.382	A	G	0.2797	0.1023	3	147514805	MODIFIER	SLC2A13	ENSOARG00020001221	Transcript	ENSOART00020057946.1	protein_coding	-	6/11	-	-	-	-	-	-	-	rs417629505	A	A/G	-	1	-	Uniprot_gn	-	-	-	-	-	-	-	-	-
oar3_OAR6_11584809	0.0115705	C	T	0.1742	C	T	0.2832	0.109	6	11836974	MODIFIER	-	-	-	-	-	-	-	-	-	-	-	-	-	-	-	C	C/T	-	-	-	-	-	-	-	-	-	-	-	-	-
OAR12_37205390.1	0.0115943	T	C	0.296	T	C	0.1844	0.1116	12	34334816	MODIFIER	WDR64	ENSOARG00020005994	Transcript	ENSOART00020009424.2	protein_coding	-	14/27	-	-	-	-	-	-	-	rs414776792	T	T/C	-	-1	-	Uniprot_gn	-	-	-	-	-	-	-	-	-
OAR12_37205390.1	0.0115943	T	C	0.296	T	C	0.1844	0.1116	12	34334816	MODIFIER	WDR64	ENSOARG00020005994	Transcript	ENSOART00020009552.2	protein_coding	-	12/25	-	-	-	-	-	-	-	rs414776792	T	T/C	-	-1	-	Uniprot_gn	-	-	-	-	-	-	-	-	-
OAR12_37205390.1	0.0115943	T	C	0.296	T	C	0.1844	0.1116	12	34334816	MODIFIER	WDR64	ENSOARG00020005994	Transcript	ENSOART00020046322.1	protein_coding	-	11/24	-	-	-	-	-	-	-	rs414776792	T	T/C	-	-1	-	Uniprot_gn	-	-	-	-	-	-	-	-	-
OAR12_37205390.1	0.0115943	T	C	0.296	T	C	0.1844	0.1116	12	34334816	MODIFIER	WDR64	ENSOARG00020005994	Transcript	ENSOART00020048064.1	protein_coding	-	14/26	-	-	-	-	-	-	-	rs414776792	T	T/C	-	-1	-	Uniprot_gn	-	-	-	-	-	-	-	-	-
OAR12_37205390.1	0.0115943	T	C	0.296	T	C	0.1844	0.1116	12	34334816	MODIFIER	WDR64	ENSOARG00020005994	Transcript	ENSOART00020067043.1	protein_coding	-	-	-	-	-	-	-	-	-	rs414776792	T	T/C	2310	-1	-	Uniprot_gn	-	-	-	-	-	-	-	-	-
s45698.1	0.0116595	A	G	0.4775	A	G	0.3592	0.1183	23	1277910	MODIFIER	-	-	-	-	-	-	-	-	-	-	-	-	-	-	-	A	A/G	-	-	-	-	-	-	-	-	-	-	-	-	-
oar3_OAR5_46250251	0.0116757	A	G	0.4298	A	G	0.3182	0.1116	5	46515833	MODIFIER	SPOCK1	ENSOARG00020011504	Transcript	ENSOART00020017688.2	protein_coding	-	1/9	-	-	-	-	-	-	-	-	A	A/G	-	-1	-	HGNC	HGNC:11251	-	-	-	-	-	-	-	-
oar3_OAR5_46250251	0.0116757	A	G	0.4298	A	G	0.3182	0.1116	5	46515833	MODIFIER	SPOCK1	ENSOARG00020011504	Transcript	ENSOART00020067643.1	protein_coding	-	1/10	-	-	-	-	-	-	-	-	A	A/G	-	-1	-	HGNC	HGNC:11251	-	-	-	-	-	-	-	-
oar3_OAR5_46250251	0.0116757	A	G	0.4298	A	G	0.3182	0.1116	5	46515833	MODIFIER	SPOCK1	ENSOARG00020011504	Transcript	ENSOART00020075511.1	protein_coding	-	1/10	-	-	-	-	-	-	-	-	A	A/G	-	-1	-	HGNC	HGNC:11251	-	-	-	-	-	-	-	-
OAR5_97776609.1	0.0116909	G	A	0.4972	A	G	0.3916	0.1112	5	89867028	MODIFIER	-	-	-	-	-	-	-	-	-	-	-	-	-	-	-	G	G/A	-	-	-	-	-	-	-	-	-	-	-	-	-
s74191.1	0.0117256	A	G	0.2191	A	G	0.3147	0.0956	11	36335084	MODIFIER	-	-	-	-	-	-	-	-	-	-	-	-	-	-	-	A	A/G	-	-	-	-	-	-	-	-	-	-	-	-	-
OAR6_60112141.1	0.0117617	C	T	0.4242	T	C	0.4755	0.1003	6	55385404	MODIFIER	-	-	-	-	-	-	-	-	-	-	-	-	-	-	-	C	C/T	-	-	-	-	-	-	-	-	-	-	-	-	-
s20053.1	0.0119383	T	C	0.3539	T	C	0.2447	0.1092	22	8577799	MODIFIER	-	-	-	-	-	-	-	-	-	-	-	-	-	-	-	T	T/C	-	-	-	-	-	-	-	-	-	-	-	-	-
OAR14_23163423.1	0.0121325	G	T	0.3164	G	T	0.4161	0.0997	14	22532196	MODIFIER	-	-	-	-	-	-	-	-	-	-	-	-	-	-	-	G	G/T	-	-	-	-	-	-	-	-	-	-	-	-	-
s36959.1	0.0121513	G	A	0.3287	G	A	0.2308	0.0979	19	47377835	MODIFIER	CACNA1D	ENSOARG00020021987	Transcript	ENSOART00020036432.2	protein_coding	-	8/47	-	-	-	-	-	-	-	rs422161637	G	G/A	-	-1	-	HGNC	HGNC:1391	-	-	-	-	-	-	-	-
s36959.1	0.0121513	G	A	0.3287	G	A	0.2308	0.0979	19	47377835	MODIFIER	CACNA1D	ENSOARG00020021987	Transcript	ENSOART00020036890.2	protein_coding	-	8/45	-	-	-	-	-	-	-	rs422161637	G	G/A	-	-1	-	HGNC	HGNC:1391	-	-	-	-	-	-	-	-
s36959.1	0.0121513	G	A	0.3287	G	A	0.2308	0.0979	19	47377835	MODIFIER	CACNA1D	ENSOARG00020021987	Transcript	ENSOART00020036951.2	protein_coding	-	8/40	-	-	-	-	-	-	-	rs422161637	G	G/A	-	-1	-	HGNC	HGNC:1391	-	-	-	-	-	-	-	-
OAR8_49852851.1	0.0122217	C	T	0.4579	T	C	0.4371	0.105	8	46605754	MODIFIER	-	-	-	-	-	-	-	-	-	-	-	-	-	-	rs424327853	C	C/T	-	-	-	-	-	-	-	-	-	-	-	-	-
oar3_OAR16_35757104	0.0123583	T	C	0.4944	T	C	0.3671	0.1273	16	35996725	MODIFIER	LIFR	ENSOARG00020010940	Transcript	ENSOART00020016697.2	protein_coding	-	-	-	-	-	-	-	-	-	-	T	T/C	2108	1	-	HGNC	HGNC:6597	-	-	-	-	-	-	-	-
OAR17_54827490.1	0.0126811	A	G	0.4885	A	G	0.3662	0.1223	17	50808813	MODIFIER	AACS	ENSOARG00020003505	Transcript	ENSOART00020005340.2	protein_coding	-	1/16	-	-	-	-	-	-	-	-	A	A/G	-	-1	-	Uniprot_gn	-	-	-	-	-	-	-	-	-
OAR17_54827490.1	0.0126811	A	G	0.4885	A	G	0.3662	0.1223	17	50808813	MODIFIER	AACS	ENSOARG00020003505	Transcript	ENSOART00020005379.2	protein_coding	-	1/17	-	-	-	-	-	-	-	-	A	A/G	-	-1	-	Uniprot_gn	-	-	-	-	-	-	-	-	-
s35831.1	0.0126874	T	C	0.4326	C	T	0.458	0.1094	2	51245220	MODIFIER	POLR1E	ENSOARG00020002256	Transcript	ENSOART00020003427.2	protein_coding	-	11/11	-	-	-	-	-	-	-	-	T	T/C	-	-1	-	HGNC	HGNC:17631	-	-	-	-	-	-	-	-
s35831.1	0.0126874	T	C	0.4326	C	T	0.458	0.1094	2	51245220	MODIFIER	POLR1E	ENSOARG00020002256	Transcript	ENSOART00020059219.1	protein_coding	-	12/12	-	-	-	-	-	-	-	-	T	T/C	-	-1	-	HGNC	HGNC:17631	-	-	-	-	-	-	-	-
oar3_OAR10_5777545	0.0127715	A	G	0.486	A	G	0.3846	0.1014	10	5815528	MODIFIER	-	-	-	-	-	-	-	-	-	-	-	-	-	-	-	A	A/G	-	-	-	-	-	-	-	-	-	-	-	-	-
s48448.1	0.0127776	A	G	0.3427	A	G	0.2238	0.1189	3	173101074	MODIFIER	NT5DC3	ENSOARG00020012234	Transcript	ENSOART00020018792.2	protein_coding	-	1/13	-	-	-	-	-	-	-	-	A	A/G	-	-1	-	HGNC	HGNC:30826	-	-	-	-	-	-	-	-
OAR15_22767918.1	0.0128969	A	G	0.4185	A	G	0.3147	0.1038	15	22079354	MODIFIER	NKAPD1	ENSOARG00020040184	Transcript	ENSOART00020041822.1	protein_coding	6/6	-	-	-	1999	-	-	-	-	rs160685320	A	A/G	-	1	-	Uniprot_gn	-	-	-	-	-	-	-	-	-
OAR15_22767918.1	0.0128969	A	G	0.4185	A	G	0.3147	0.1038	15	22079354	MODIFIER	SDHD	ENSOARG00020019097	Transcript	ENSOART00020029440.2	protein_coding	-	-	-	-	-	-	-	-	-	rs160685320	A	A/G	1625	1	-	HGNC	HGNC:10683	-	-	-	-	-	-	-	-
OAR15_22767918.1	0.0128969	A	G	0.4185	A	G	0.3147	0.1038	15	22079354	MODIFIER	SDHD	ENSOARG00020019097	Transcript	ENSOART00020029472.2	protein_coding	-	-	-	-	-	-	-	-	-	rs160685320	A	A/G	1625	1	-	HGNC	HGNC:10683	-	-	-	-	-	-	-	-
OAR15_22767918.1	0.0128969	A	G	0.4185	A	G	0.3147	0.1038	15	22079354	MODIFIER	SDHD	ENSOARG00020019097	Transcript	ENSOART00020029599.2	protein_coding	-	-	-	-	-	-	-	-	-	rs160685320	A	A/G	3407	1	-	HGNC	HGNC:10683	-	-	-	-	-	-	-	-
OAR15_22767918.1	0.0128969	A	G	0.4185	A	G	0.3147	0.1038	15	22079354	MODIFIER	SDHD	ENSOARG00020019097	Transcript	ENSOART00020067520.1	protein_coding	-	-	-	-	-	-	-	-	-	rs160685320	A	A/G	3393	1	-	HGNC	HGNC:10683	-	-	-	-	-	-	-	-
OAR15_22767918.1	0.0128969	A	G	0.4185	A	G	0.3147	0.1038	15	22079354	MODIFIER	TIMM8B	ENSOARG00020035566	Transcript	ENSOART00020043701.1	protein_coding	3/3	-	-	-	1584	-	-	-	-	rs160685320	A	A/G	-	-1	-	HGNC	HGNC:11818	-	-	-	-	-	-	-	-
OAR12_36068031.1	0.012993	G	A	0.323	G	A	0.2168	0.1062	12	33300179	MODIFIER	-	-	-	-	-	-	-	-	-	-	-	-	-	-	-	G	G/A	-	-	-	-	-	-	-	-	-	-	-	-	-
OAR1_236063909.1	0.0130149	A	G	0.42	G	A	0.475	0.105	1	221450416	MODIFIER	-	-	-	-	-	-	-	-	-	-	-	-	-	-	rs424696974	A	A/G	-	-	-	-	-	-	-	-	-	-	-	-	-
DU523483_560.1	0.0130318	C	T	0.309	C	T	0.2133	0.0957	6	48685813	MODIFIER	-	-	-	-	-	-	-	-	-	-	-	-	-	-	-	C	C/T	-	-	-	-	-	-	-	-	-	-	-	-	-
oar3_OAR19_55093479	0.0130883	A	C	0.3792	A	C	0.2762	0.103	19	55165583	MODIFIER	HRH1	ENSOARG00020040378	Transcript	ENSOART00020052163.1	protein_coding	-	2/3	-	-	-	-	-	-	-	-	A	A/C	-	1	-	HGNC	HGNC:5182	-	-	-	-	-	-	-	-
oar3_OAR19_55093479	0.0130883	A	C	0.3792	A	C	0.2762	0.103	19	55165583	MODIFIER	HRH1	ENSOARG00020040378	Transcript	ENSOART00020053235.1	protein_coding	-	1/5	-	-	-	-	-	-	-	-	A	A/C	-	1	-	HGNC	HGNC:5182	-	-	-	-	-	-	-	-
oar3_OAR19_55093479	0.0130883	A	C	0.3792	A	C	0.2762	0.103	19	55165583	MODIFIER	HRH1	ENSOARG00020040378	Transcript	ENSOART00020054581.1	protein_coding	-	1/2	-	-	-	-	-	-	-	-	A	A/C	-	1	-	HGNC	HGNC:5182	-	-	-	-	-	-	-	-
oar3_OAR19_55093479	0.0130883	A	C	0.3792	A	C	0.2762	0.103	19	55165583	MODIFIER	HRH1	ENSOARG00020040378	Transcript	ENSOART00020057210.1	protein_coding	-	1/1	-	-	-	-	-	-	-	-	A	A/C	-	1	-	HGNC	HGNC:5182	-	-	-	-	-	-	-	-
oar3_OAR19_55093479	0.0130883	A	C	0.3792	A	C	0.2762	0.103	19	55165583	MODIFIER	HRH1	ENSOARG00020040378	Transcript	ENSOART00020059908.1	protein_coding	-	5/7	-	-	-	-	-	-	-	-	A	A/C	-	1	-	HGNC	HGNC:5182	-	-	-	-	-	-	-	-
oar3_OAR19_55093479	0.0130883	A	C	0.3792	A	C	0.2762	0.103	19	55165583	MODIFIER	HRH1	ENSOARG00020040378	Transcript	ENSOART00020061301.1	protein_coding	-	1/2	-	-	-	-	-	-	-	-	A	A/C	-	1	-	HGNC	HGNC:5182	-	-	-	-	-	-	-	-
oar3_OAR19_55093479	0.0130883	A	C	0.3792	A	C	0.2762	0.103	19	55165583	MODIFIER	HRH1	ENSOARG00020040378	Transcript	ENSOART00020066029.1	protein_coding	-	1/2	-	-	-	-	-	-	-	-	A	A/C	-	1	-	HGNC	HGNC:5182	-	-	-	-	-	-	-	-
OAR6_106495415.1	0.0132333	T	C	0.4803	T	C	0.3846	0.0957	6	97961420	MODIFIER	ENOPH1	ENSOARG00020010424	Transcript	ENSOART00020015954.2	protein_coding	-	6/6	-	-	-	-	-	-	-	rs400214708	T	T/C	-	1	-	HGNC	HGNC:24599	-	-	-	-	-	-	-	-
OAR6_106495415.1	0.0132333	T	C	0.4803	T	C	0.3846	0.0957	6	97961420	MODIFIER	ENOPH1	ENSOARG00020010424	Transcript	ENSOART00020016071.2	protein_coding	-	5/5	-	-	-	-	-	-	-	rs400214708	T	T/C	-	1	-	HGNC	HGNC:24599	-	-	-	-	-	-	-	-
OAR6_106495415.1	0.0132333	T	C	0.4803	T	C	0.3846	0.0957	6	97961420	MODIFIER	ENOPH1	ENSOARG00020010424	Transcript	ENSOART00020063718.1	protein_coding	-	5/5	-	-	-	-	-	-	-	rs400214708	T	T/C	-	1	-	HGNC	HGNC:24599	-	-	-	-	-	-	-	-
s17961.1	0.0133399	C	T	0.2931	C	T	0.3964	0.1033	20	7074136	MODIFIER	-	-	-	-	-	-	-	-	-	-	-	-	-	-	-	C	C/T	-	-	-	-	-	-	-	-	-	-	-	-	-
s03406.1	0.0133813	C	T	0.4213	C	T	0.3042	0.1171	16	35923282	MODIFIER	-	-	-	-	-	-	-	-	-	-	-	-	-	-	-	C	C/T	-	-	-	-	-	-	-	-	-	-	-	-	-
OAR5_95683754.1	0.0134642	G	A	0.4517	A	G	0.451	0.0973	5	87871423	MODIFIER	ADGRV1	ENSOARG00020023738	Transcript	ENSOART00020036952.2	protein_coding	-	29/89	-	-	-	-	-	-	-	rs415558729	G	G/A	-	1	-	HGNC	HGNC:17416	-	-	-	-	-	-	-	-
oar3_OAR19_56407937	0.0134882	T	C	0.4719	C	T	0.4091	0.119	19	56499072	MODIFIER	MKRN2	ENSOARG00020025818	Transcript	ENSOART00020040560.2	protein_coding	-	5/7	-	-	-	-	-	-	-	rs409451187	T	T/C	-	-1	-	Uniprot_gn	-	-	-	-	-	-	-	-	-
oar3_OAR19_56407937	0.0134882	T	C	0.4719	C	T	0.4091	0.119	19	56499072	MODIFIER	MKRN2	ENSOARG00020025818	Transcript	ENSOART00020040566.2	protein_coding	-	4/6	-	-	-	-	-	-	-	rs409451187	T	T/C	-	-1	-	Uniprot_gn	-	-	-	-	-	-	-	-	-
oar3_OAR19_56407937	0.0134882	T	C	0.4719	C	T	0.4091	0.119	19	56499072	MODIFIER	MKRN2	ENSOARG00020025818	Transcript	ENSOART00020071324.1	protein_coding	-	5/7	-	-	-	-	-	-	-	rs409451187	T	T/C	-	-1	-	Uniprot_gn	-	-	-	-	-	-	-	-	-
oar3_OAR19_56407937	0.0134882	T	C	0.4719	C	T	0.4091	0.119	19	56499072	MODIFIER	MKRN2	ENSOARG00020025818	Transcript	ENSOART00020080102.1	protein_coding	-	5/7	-	-	-	-	-	-	-	rs409451187	T	T/C	-	-1	-	Uniprot_gn	-	-	-	-	-	-	-	-	-
oar3_OAR19_56417014	0.0134882	G	T	0.4719	T	G	0.4091	0.119	19	56507689	MODIFIER	MKRN2	ENSOARG00020025818	Transcript	ENSOART00020040560.2	protein_coding	-	1/7	-	-	-	-	-	-	-	rs403990779	G	G/T	-	-1	-	Uniprot_gn	-	-	-	-	-	-	-	-	-
oar3_OAR19_56417014	0.0134882	G	T	0.4719	T	G	0.4091	0.119	19	56507689	MODIFIER	MKRN2	ENSOARG00020025818	Transcript	ENSOART00020040566.2	protein_coding	-	1/6	-	-	-	-	-	-	-	rs403990779	G	G/T	-	-1	-	Uniprot_gn	-	-	-	-	-	-	-	-	-
oar3_OAR19_56417014	0.0134882	G	T	0.4719	T	G	0.4091	0.119	19	56507689	MODIFIER	MKRN2	ENSOARG00020025818	Transcript	ENSOART00020071324.1	protein_coding	-	1/7	-	-	-	-	-	-	-	rs403990779	G	G/T	-	-1	-	Uniprot_gn	-	-	-	-	-	-	-	-	-
oar3_OAR19_56417014	0.0134882	G	T	0.4719	T	G	0.4091	0.119	19	56507689	MODIFIER	MKRN2	ENSOARG00020025818	Transcript	ENSOART00020080102.1	protein_coding	-	1/7	-	-	-	-	-	-	-	rs403990779	G	G/T	-	-1	-	Uniprot_gn	-	-	-	-	-	-	-	-	-
OAR17_55821508.1	0.0135958	C	T	0.3427	C	T	0.2203	0.1224	17	51739628	MODIFIER	ZNF664	ENSOARG00020027960	Transcript	ENSOART00020053081.1	protein_coding	-	5/8	-	-	-	-	-	-	-	-	C	C/T	-	-1	-	HGNC	HGNC:25406	-	-	-	-	-	-	-	-
OAR17_55821508.1	0.0135958	C	T	0.3427	C	T	0.2203	0.1224	17	51739628	MODIFIER	ZNF664	ENSOARG00020027960	Transcript	ENSOART00020079160.1	protein_coding	-	-	-	-	-	-	-	-	-	-	C	C/T	4140	-1	-	HGNC	HGNC:25406	-	-	-	-	-	-	-	-
OAR19_20990607.1	0.0136872	A	G	0.323	A	G	0.4371	0.1141	19	20128516	MODIFIER	-	-	-	-	-	-	-	-	-	-	-	-	-	-	-	A	A/G	-	-	-	-	-	-	-	-	-	-	-	-	-
oar3_OAR16_21160801	0.0136967	C	A	0.3876	C	A	0.2832	0.1044	16	21296444	MODIFIER	-	-	-	-	-	-	-	-	-	-	-	-	-	-	-	C	C/A	-	-	-	-	-	-	-	-	-	-	-	-	-
s36729.1	0.0139354	A	G	0.4747	G	A	0.4091	0.1162	2	157950202	MODIFIER	NEB	ENSOARG00020024247	Transcript	ENSOART00020037938.2	protein_coding	-	78/156	-	-	-	-	-	-	-	-	A	A/G	-	1	-	HGNC	HGNC:7720	-	-	-	-	-	-	-	-
s36729.1	0.0139354	A	G	0.4747	G	A	0.4091	0.1162	2	157950202	MODIFIER	NEB	ENSOARG00020024247	Transcript	ENSOART00020037996.2	protein_coding	-	75/149	-	-	-	-	-	-	-	-	A	A/G	-	1	-	HGNC	HGNC:7720	-	-	-	-	-	-	-	-
s36729.1	0.0139354	A	G	0.4747	G	A	0.4091	0.1162	2	157950202	MODIFIER	NEB	ENSOARG00020024247	Transcript	ENSOART00020042894.1	protein_coding	-	78/157	-	-	-	-	-	-	-	-	A	A/G	-	1	-	HGNC	HGNC:7720	-	-	-	-	-	-	-	-
s36729.1	0.0139354	A	G	0.4747	G	A	0.4091	0.1162	2	157950202	MODIFIER	NEB	ENSOARG00020024247	Transcript	ENSOART00020051441.1	protein_coding	-	79/152	-	-	-	-	-	-	-	-	A	A/G	-	1	-	HGNC	HGNC:7720	-	-	-	-	-	-	-	-
s36729.1	0.0139354	A	G	0.4747	G	A	0.4091	0.1162	2	157950202	MODIFIER	NEB	ENSOARG00020024247	Transcript	ENSOART00020055296.1	protein_coding	-	71/148	-	-	-	-	-	-	-	-	A	A/G	-	1	-	HGNC	HGNC:7720	-	-	-	-	-	-	-	-
s36729.1	0.0139354	A	G	0.4747	G	A	0.4091	0.1162	2	157950202	MODIFIER	NEB	ENSOARG00020024247	Transcript	ENSOART00020057012.1	protein_coding	-	78/163	-	-	-	-	-	-	-	-	A	A/G	-	1	-	HGNC	HGNC:7720	-	-	-	-	-	-	-	-
s36729.1	0.0139354	A	G	0.4747	G	A	0.4091	0.1162	2	157950202	MODIFIER	NEB	ENSOARG00020024247	Transcript	ENSOART00020060990.1	protein_coding	-	75/153	-	-	-	-	-	-	-	-	A	A/G	-	1	-	HGNC	HGNC:7720	-	-	-	-	-	-	-	-
s36729.1	0.0139354	A	G	0.4747	G	A	0.4091	0.1162	2	157950202	MODIFIER	NEB	ENSOARG00020024247	Transcript	ENSOART00020064918.1	protein_coding	-	78/158	-	-	-	-	-	-	-	-	A	A/G	-	1	-	HGNC	HGNC:7720	-	-	-	-	-	-	-	-
s36729.1	0.0139354	A	G	0.4747	G	A	0.4091	0.1162	2	157950202	MODIFIER	NEB	ENSOARG00020024247	Transcript	ENSOART00020068989.1	protein_coding	-	78/155	-	-	-	-	-	-	-	-	A	A/G	-	1	-	HGNC	HGNC:7720	-	-	-	-	-	-	-	-
s36729.1	0.0139354	A	G	0.4747	G	A	0.4091	0.1162	2	157950202	MODIFIER	NEB	ENSOARG00020024247	Transcript	ENSOART00020081973.1	protein_coding	-	78/158	-	-	-	-	-	-	-	-	A	A/G	-	1	-	HGNC	HGNC:7720	-	-	-	-	-	-	-	-
DU245849_435.1	0.0140004	A	T	0.4382	A	T	0.3287	0.1095	5	14212330	MODIFIER	PCP2	ENSOARG00020009522	Transcript	ENSOART00020014666.2	protein_coding	-	-	-	-	-	-	-	-	-	rs55632453	A	A/T	3121	-1	-	HGNC	HGNC:30209	-	-	-	-	-	-	-	-
DU245849_435.1	0.0140004	A	T	0.4382	A	T	0.3287	0.1095	5	14212330	MODIFIER	PCP2	ENSOARG00020009522	Transcript	ENSOART00020014694.2	protein_coding	-	-	-	-	-	-	-	-	-	rs55632453	A	A/T	3266	-1	-	HGNC	HGNC:30209	-	-	-	-	-	-	-	-
DU245849_435.1	0.0140004	A	T	0.4382	A	T	0.3287	0.1095	5	14212330	MODIFIER	STXBP2	ENSOARG00020009628	Transcript	ENSOART00020014818.2	protein_coding	-	-	-	-	-	-	-	-	-	rs55632453	A	A/T	2496	1	-	HGNC	HGNC:11445	-	-	-	-	-	-	-	-
DU245849_435.1	0.0140004	A	T	0.4382	A	T	0.3287	0.1095	5	14212330	MODIFIER	STXBP2	ENSOARG00020009628	Transcript	ENSOART00020048582.1	protein_coding	-	-	-	-	-	-	-	-	-	rs55632453	A	A/T	1147	1	-	HGNC	HGNC:11445	-	-	-	-	-	-	-	-
oar3_OAR2_244692286	0.0140625	G	A	0.4382	A	G	0.451	0.1108	2	245534275	MODIFIER	EIF4G3	ENSOARG00020021895	Transcript	ENSOART00020034769.2	protein_coding	-	25/33	-	-	-	-	-	-	-	-	G	G/A	-	1	-	HGNC	HGNC:3298	-	-	-	-	-	-	-	-
oar3_OAR2_244692286	0.0140625	G	A	0.4382	A	G	0.451	0.1108	2	245534275	MODIFIER	EIF4G3	ENSOARG00020021895	Transcript	ENSOART00020034832.2	protein_coding	-	24/32	-	-	-	-	-	-	-	-	G	G/A	-	1	-	HGNC	HGNC:3298	-	-	-	-	-	-	-	-
oar3_OAR2_244692286	0.0140625	G	A	0.4382	A	G	0.451	0.1108	2	245534275	MODIFIER	EIF4G3	ENSOARG00020021895	Transcript	ENSOART00020034892.2	protein_coding	-	25/33	-	-	-	-	-	-	-	-	G	G/A	-	1	-	HGNC	HGNC:3298	-	-	-	-	-	-	-	-
oar3_OAR2_244692286	0.0140625	G	A	0.4382	A	G	0.451	0.1108	2	245534275	MODIFIER	EIF4G3	ENSOARG00020021895	Transcript	ENSOART00020034961.2	protein_coding	-	26/34	-	-	-	-	-	-	-	-	G	G/A	-	1	-	HGNC	HGNC:3298	-	-	-	-	-	-	-	-
oar3_OAR2_244692286	0.0140625	G	A	0.4382	A	G	0.451	0.1108	2	245534275	MODIFIER	EIF4G3	ENSOARG00020021895	Transcript	ENSOART00020069055.1	protein_coding	-	24/32	-	-	-	-	-	-	-	-	G	G/A	-	1	-	HGNC	HGNC:3298	-	-	-	-	-	-	-	-
oar3_OAR5_27478850	0.014077	G	A	0.3146	G	A	0.2028	0.1118	5	27706341	MODIFIER	-	-	-	-	-	-	-	-	-	-	-	-	-	-	-	G	G/A	-	-	-	-	-	-	-	-	-	-	-	-	-
oar3_OAR19_36768056	0.0141229	T	G	0.3483	T	G	0.4545	0.1062	19	36867948	MODIFIER	-	ENSOARG00020026999	Transcript	ENSOART00020055407.1	protein_coding	-	-	-	-	-	-	-	-	-	-	T	T/G	3654	-1	-	-	-	-	-	-	-	-	-	-	-
oar3_OAR9_87767372	0.0143198	T	C	0.4379	T	C	0.3298	0.1081	9	88096467	MODIFIER	-	-	-	-	-	-	-	-	-	-	-	-	-	-	rs422685711	T	T/C	-	-	-	-	-	-	-	-	-	-	-	-	-
s44809.1	0.0143518	G	A	0.2486	G	A	0.3464	0.0978	3	224431917	MODIFIER	-	-	-	-	-	-	-	-	-	-	-	-	-	-	rs410692459	G	G/A	-	-	-	-	-	-	-	-	-	-	-	-	-
s18265.1	0.0143666	C	T	0.4157	T	C	0.4824	0.1019	22	45954256	MODIFIER	DOCK1	ENSOARG00020024201	Transcript	ENSOART00020037809.2	protein_coding	-	13/51	-	-	-	-	-	-	-	rs403791751	C	C/T	-	1	-	HGNC	HGNC:2987	-	-	-	-	-	-	-	-
s18265.1	0.0143666	C	T	0.4157	T	C	0.4824	0.1019	22	45954256	MODIFIER	DOCK1	ENSOARG00020024201	Transcript	ENSOART00020038313.2	protein_coding	-	13/49	-	-	-	-	-	-	-	rs403791751	C	C/T	-	1	-	HGNC	HGNC:2987	-	-	-	-	-	-	-	-
s18265.1	0.0143666	C	T	0.4157	T	C	0.4824	0.1019	22	45954256	MODIFIER	DOCK1	ENSOARG00020024201	Transcript	ENSOART00020038624.2	protein_coding	-	13/48	-	-	-	-	-	-	-	rs403791751	C	C/T	-	1	-	HGNC	HGNC:2987	-	-	-	-	-	-	-	-
s18265.1	0.0143666	C	T	0.4157	T	C	0.4824	0.1019	22	45954256	MODIFIER	DOCK1	ENSOARG00020024201	Transcript	ENSOART00020038905.2	protein_coding	-	13/51	-	-	-	-	-	-	-	rs403791751	C	C/T	-	1	-	HGNC	HGNC:2987	-	-	-	-	-	-	-	-
s18265.1	0.0143666	C	T	0.4157	T	C	0.4824	0.1019	22	45954256	MODIFIER	DOCK1	ENSOARG00020024201	Transcript	ENSOART00020039006.2	protein_coding	-	13/50	-	-	-	-	-	-	-	rs403791751	C	C/T	-	1	-	HGNC	HGNC:2987	-	-	-	-	-	-	-	-
OAR1_163708364.1	0.01439	C	T	0.3315	C	T	0.2324	0.0991	1	154475994	MODIFIER	-	-	-	-	-	-	-	-	-	-	-	-	-	-	-	C	C/T	-	-	-	-	-	-	-	-	-	-	-	-	-
OAR1_27060195.1	0.0144017	G	A	0.3764	G	A	0.486	0.1096	1	26989929	MODIFIER	-	ENSOARG00020030202	Transcript	ENSOART00020075161.1	lncRNA	-	-	-	-	-	-	-	-	-	-	G	G/A	4996	1	-	-	-	-	-	-	-	-	-	-	-
OAR1_27060195.1	0.0144017	G	A	0.3764	G	A	0.486	0.1096	1	26989929	MODIFIER	-	ENSOARG00020030202	Transcript	ENSOART00020081539.1	lncRNA	-	-	-	-	-	-	-	-	-	-	G	G/A	4905	1	-	-	-	-	-	-	-	-	-	-	-
oar3_OAR6_115062449	0.0146394	C	T	0.3315	C	T	0.4437	0.1122	6	116370832	MODIFIER	HTT	ENSOARG00020020229	Transcript	ENSOART00020032360.2	protein_coding	-	34/66	-	-	-	-	-	-	-	rs410385842	C	C/T	-	-1	-	HGNC	HGNC:4851	-	-	-	-	-	-	-	-
oar3_OAR6_115062449	0.0146394	C	T	0.3315	C	T	0.4437	0.1122	6	116370832	MODIFIER	HTT	ENSOARG00020020229	Transcript	ENSOART00020053822.1	protein_coding	-	33/65	-	-	-	-	-	-	-	rs410385842	C	C/T	-	-1	-	HGNC	HGNC:4851	-	-	-	-	-	-	-	-
OAR2_134410663.1	0.0147549	A	G	0.4129	A	G	0.3077	0.1052	2	127297029	MODIFIER	PDE1A	ENSOARG00020017541	Transcript	ENSOART00020027391.2	protein_coding	-	2/15	-	-	-	-	-	-	-	-	A	A/G	-	1	-	HGNC	HGNC:8774	-	-	-	-	-	-	-	-
OAR2_134410663.1	0.0147549	A	G	0.4129	A	G	0.3077	0.1052	2	127297029	MODIFIER	PDE1A	ENSOARG00020017541	Transcript	ENSOART00020027464.2	protein_coding	-	2/15	-	-	-	-	-	-	-	-	A	A/G	-	1	-	HGNC	HGNC:8774	-	-	-	-	-	-	-	-
OAR14_32554774.1	0.0148361	C	A	0.3511	C	A	0.479	0.1279	14	31543941	MODIFIER	-	-	-	-	-	-	-	-	-	-	-	-	-	-	-	C	C/A	-	-	-	-	-	-	-	-	-	-	-	-	-
OAR3_52584729.1	0.0148819	G	T	0.3371	G	T	0.4476	0.1105	3	50078757	MODIFIER	-	-	-	-	-	-	-	-	-	-	-	-	-	-	rs420273879	G	G/T	-	-	-	-	-	-	-	-	-	-	-	-	-
OAR2_179914617.1	0.0149731	T	C	0.4803	T	C	0.3811	0.0992	2	170990906	MODIFIER	-	-	-	-	-	-	-	-	-	-	-	-	-	-	rs417346487	T	T/C	-	-	-	-	-	-	-	-	-	-	-	-	-
OAR22_832781.1	0.0150277	T	C	0.427	T	C	0.3077	0.1193	22	376903	MODIFIER	IPMK	ENSOARG00020032343	Transcript	ENSOART00020047516.1	protein_coding	-	1/5	-	-	-	-	-	-	-	-	T	T/C	-	1	-	HGNC	HGNC:20739	-	-	-	-	-	-	-	-
oar3_OAR22_348027	0.0150277	A	G	0.427	A	G	0.3077	0.1193	22	363051	MODIFIER	CISD1	ENSOARG00020020724	Transcript	ENSOART00020031975.2	protein_coding	-	2/3	-	-	-	-	-	-	-	-	A	A/G	-	-1	-	HGNC	HGNC:30880	-	-	-	-	-	-	-	-
oar3_OAR22_348027	0.0150277	A	G	0.427	A	G	0.3077	0.1193	22	363051	MODIFIER	CISD1	ENSOARG00020020724	Transcript	ENSOART00020041933.1	protein_coding	-	3/4	-	-	-	-	-	-	-	-	A	A/G	-	-1	-	HGNC	HGNC:30880	-	-	-	-	-	-	-	-
oar3_OAR22_348027	0.0150277	A	G	0.427	A	G	0.3077	0.1193	22	363051	MODIFIER	CISD1	ENSOARG00020020724	Transcript	ENSOART00020079409.1	protein_coding	-	1/2	-	-	-	-	-	-	-	-	A	A/G	-	-1	-	HGNC	HGNC:30880	-	-	-	-	-	-	-	-
OAR3_168469358.1	0.0150753	G	A	0.4944	G	A	0.3601	0.1343	3	157646840	MODIFIER	-	ENSOARG00020033924	Transcript	ENSOART00020045374.1	protein_coding	-	1/1	-	-	-	-	-	-	-	rs411778603	G	G/A	-	1	-	-	-	-	-	-	-	-	-	-	-
OAR3_168469358.1	0.0150753	G	A	0.4944	G	A	0.3601	0.1343	3	157646840	MODIFIER	-	ENSOARG00020036134	Transcript	ENSOART00020052628.1	protein_coding	-	1/1	-	-	-	-	-	-	-	rs411778603	G	G/A	-	1	-	-	-	-	-	-	-	-	-	-	-
OAR16_42806888.1	0.0151215	T	C	0.4719	T	C	0.3671	0.1048	16	39578976	MODIFIER	RAI14	ENSOARG00020017436	Transcript	ENSOART00020026955.2	protein_coding	-	4/19	-	-	-	-	-	-	-	rs410614862	T	T/C	-	-1	-	HGNC	HGNC:14873	-	-	-	-	-	-	-	-
OAR16_42806888.1	0.0151215	T	C	0.4719	T	C	0.3671	0.1048	16	39578976	MODIFIER	RAI14	ENSOARG00020017436	Transcript	ENSOART00020027293.2	protein_coding	-	4/19	-	-	-	-	-	-	-	rs410614862	T	T/C	-	-1	-	HGNC	HGNC:14873	-	-	-	-	-	-	-	-
OAR16_42806888.1	0.0151215	T	C	0.4719	T	C	0.3671	0.1048	16	39578976	MODIFIER	RAI14	ENSOARG00020017436	Transcript	ENSOART00020027652.2	protein_coding	-	4/17	-	-	-	-	-	-	-	rs410614862	T	T/C	-	-1	-	HGNC	HGNC:14873	-	-	-	-	-	-	-	-
OAR16_42806888.1	0.0151215	T	C	0.4719	T	C	0.3671	0.1048	16	39578976	MODIFIER	RAI14	ENSOARG00020017436	Transcript	ENSOART00020027842.2	protein_coding	-	3/17	-	-	-	-	-	-	-	rs410614862	T	T/C	-	-1	-	HGNC	HGNC:14873	-	-	-	-	-	-	-	-
OAR18_9604535.1	0.0151759	G	A	0.3848	A	G	0.493	0.1222	18	10006361	MODIFIER	-	-	-	-	-	-	-	-	-	-	-	-	-	-	rs420913866	G	G/A	-	-	-	-	-	-	-	-	-	-	-	-	-
s65350.1	0.0152171	G	A	0.2917	G	A	0.3931	0.1014	6	116680775	MODIFIER	-	-	-	-	-	-	-	-	-	-	-	-	-	-	-	G	G/A	-	-	-	-	-	-	-	-	-	-	-	-	-
s54829.1	0.0152259	G	A	0.4522	A	G	0.4406	0.1072	7	25112537	LOW	OR11H4	ENSOARG00020040494	Transcript	ENSOART00020016957.2	protein_coding	1/1	-	-	-	343	343	115	L	Cta/Tta	rs414692904	G	G/A	-	-1	-	HGNC	HGNC:15347	-	-	-	-	-	-	-	-
OAR24_21963265.1	0.015467	C	T	0.3455	C	T	0.4615	0.116	24	20781737	MODIFIER	OTOA	ENSOARG00020024423	Transcript	ENSOART00020038284.2	protein_coding	-	24/30	-	-	-	-	-	-	-	-	C	C/T	-	1	-	HGNC	HGNC:16378	-	-	-	-	-	-	-	-
OAR24_21963265.1	0.015467	C	T	0.3455	C	T	0.4615	0.116	24	20781737	MODIFIER	OTOA	ENSOARG00020024423	Transcript	ENSOART00020063781.1	protein_coding	-	20/24	-	-	-	-	-	-	-	-	C	C/T	-	1	-	HGNC	HGNC:16378	-	-	-	-	-	-	-	-
s29205.1	0.0155894	A	G	0.2191	A	G	0.3147	0.0956	17	68630251	MODIFIER	AP1B1	ENSOARG00020009682	Transcript	ENSOART00020014875.2	protein_coding	-	7/21	-	-	-	-	-	-	-	-	A	A/G	-	-1	-	HGNC	HGNC:554	-	-	-	-	-	-	-	-
s29205.1	0.0155894	A	G	0.2191	A	G	0.3147	0.0956	17	68630251	MODIFIER	AP1B1	ENSOARG00020009682	Transcript	ENSOART00020014943.2	protein_coding	-	7/16	-	-	-	-	-	-	-	-	A	A/G	-	-1	-	HGNC	HGNC:554	-	-	-	-	-	-	-	-
s29205.1	0.0155894	A	G	0.2191	A	G	0.3147	0.0956	17	68630251	MODIFIER	AP1B1	ENSOARG00020009682	Transcript	ENSOART00020043018.1	protein_coding	-	7/22	-	-	-	-	-	-	-	-	A	A/G	-	-1	-	HGNC	HGNC:554	-	-	-	-	-	-	-	-
s29205.1	0.0155894	A	G	0.2191	A	G	0.3147	0.0956	17	68630251	MODIFIER	AP1B1	ENSOARG00020009682	Transcript	ENSOART00020062704.1	protein_coding	-	7/21	-	-	-	-	-	-	-	-	A	A/G	-	-1	-	HGNC	HGNC:554	-	-	-	-	-	-	-	-
Chr3:171500980	0.0156059	G	A	0.3539	G	A	0.2517	0.1022	3	172020448	MODIFIER	-	-	-	-	-	-	-	-	-	-	-	-	-	-	-	G	G/A	-	-	-	-	-	-	-	-	-	-	-	-	-
oar3_OAR7_8058309	0.0156316	G	A	0.5	G	A	0.3916	0.1084	7	8274881	MODIFIER	-	ENSOARG00020033697	Transcript	ENSOART00020072867.1	protein_coding	-	-	-	-	-	-	-	-	-	-	G	G/A	3588	1	-	-	-	-	-	-	-	-	-	-	-
oar3_OAR7_8058309	0.0156316	G	A	0.5	G	A	0.3916	0.1084	7	8274881	MODIFIER	SNORA47	ENSOARG00020023157	Transcript	ENSOART00020036008.2	snoRNA	-	-	-	-	-	-	-	-	-	-	G	G/A	1206	-1	-	HGNC	HGNC:32640	-	-	-	-	-	-	-	-
oar3_OAR7_8058309	0.0156316	G	A	0.5	G	A	0.3916	0.1084	7	8274881	MODIFIER	ZBED3	ENSOARG00020037594	Transcript	ENSOART00020050390.1	protein_coding	-	1/3	-	-	-	-	-	-	-	-	G	G/A	-	-1	-	HGNC	HGNC:20711	-	-	-	-	-	-	-	-
oar3_OAR7_8058309	0.0156316	G	A	0.5	G	A	0.3916	0.1084	7	8274881	MODIFIER	ZBED3	ENSOARG00020037594	Transcript	ENSOART00020063248.1	protein_coding	-	2/4	-	-	-	-	-	-	-	-	G	G/A	-	-1	-	HGNC	HGNC:20711	-	-	-	-	-	-	-	-
oar3_OAR7_8058309	0.0156316	G	A	0.5	G	A	0.3916	0.1084	7	8274881	MODIFIER	ZBED3	ENSOARG00020037594	Transcript	ENSOART00020074424.1	protein_coding	-	2/4	-	-	-	-	-	-	-	-	G	G/A	-	-1	-	HGNC	HGNC:20711	-	-	-	-	-	-	-	-
oar3_OAR7_8058309	0.0156316	G	A	0.5	G	A	0.3916	0.1084	7	8274881	MODIFIER	ZBED3	ENSOARG00020037594	Transcript	ENSOART00020075530.1	protein_coding	-	2/3	-	-	-	-	-	-	-	-	G	G/A	-	-1	-	HGNC	HGNC:20711	-	-	-	-	-	-	-	-
OAR1_47348433.1	0.0156781	G	A	0.4494	A	G	0.4441	0.1065	1	46063199	MODIFIER	ANKRD13C	ENSOARG00020012714	Transcript	ENSOART00020019794.2	protein_coding	-	12/12	-	-	-	-	-	-	-	-	G	G/A	-	-1	-	HGNC	HGNC:25374	-	-	-	-	-	-	-	-
OAR1_47348433.1	0.0156781	G	A	0.4494	A	G	0.4441	0.1065	1	46063199	MODIFIER	SRSF11	ENSOARG00020012616	Transcript	ENSOART00020019271.2	protein_coding	13/13	-	-	-	3206	-	-	-	-	-	G	G/A	-	1	-	HGNC	HGNC:10782	-	-	-	-	-	-	-	-
OAR1_47348433.1	0.0156781	G	A	0.4494	A	G	0.4441	0.1065	1	46063199	MODIFIER	SRSF11	ENSOARG00020012616	Transcript	ENSOART00020046730.1	protein_coding	11/11	-	-	-	3165	-	-	-	-	-	G	G/A	-	1	-	HGNC	HGNC:10782	-	-	-	-	-	-	-	-
OAR4_69008447.1	0.0157329	A	G	0.1854	A	G	0.3007	0.1153	4	66734825	MODIFIER	-	-	-	-	-	-	-	-	-	-	-	-	-	-	-	A	A/G	-	-	-	-	-	-	-	-	-	-	-	-	-
OAR6_125261176.1	0.0158663	C	T	0.4747	T	C	0.4161	0.1092	6	111415966	MODIFIER	CC2D2A	ENSOARG00020005331	Transcript	ENSOART00020069433.1	protein_coding	-	33/38	-	-	-	-	-	-	-	rs417971997	C	C/T	-	1	-	HGNC	HGNC:29253	-	-	-	-	-	-	-	-
OAR6_125261176.1	0.0158663	C	T	0.4747	T	C	0.4161	0.1092	6	111415966	MODIFIER	CC2D2A	ENSOARG00020005331	Transcript	ENSOART00020071641.1	protein_coding	-	31/34	-	-	-	-	-	-	-	rs417971997	C	C/T	-	1	-	HGNC	HGNC:29253	-	-	-	-	-	-	-	-
OAR6_125261176.1	0.0158663	C	T	0.4747	T	C	0.4161	0.1092	6	111415966	MODIFIER	CC2D2A	ENSOARG00020005331	Transcript	ENSOART00020072603.1	protein_coding	-	31/36	-	-	-	-	-	-	-	rs417971997	C	C/T	-	1	-	HGNC	HGNC:29253	-	-	-	-	-	-	-	-
OAR6_125261176.1	0.0158663	C	T	0.4747	T	C	0.4161	0.1092	6	111415966	MODIFIER	CC2D2A	ENSOARG00020005331	Transcript	ENSOART00020081182.1	protein_coding	-	30/35	-	-	-	-	-	-	-	rs417971997	C	C/T	-	1	-	HGNC	HGNC:29253	-	-	-	-	-	-	-	-
oar3_OAR2_245199051	0.0159105	C	T	0.486	C	T	0.3776	0.1084	2	246041472	MODIFIER	VWA5B1	ENSOARG00020023728	Transcript	ENSOART00020037197.2	protein_coding	-	3/22	-	-	-	-	-	-	-	rs429275877	C	C/T	-	-1	-	HGNC	HGNC:26538	-	-	-	-	-	-	-	-
oar3_OAR2_245199051	0.0159105	C	T	0.486	C	T	0.3776	0.1084	2	246041472	MODIFIER	VWA5B1	ENSOARG00020023728	Transcript	ENSOART00020044105.1	protein_coding	-	3/21	-	-	-	-	-	-	-	rs429275877	C	C/T	-	-1	-	HGNC	HGNC:26538	-	-	-	-	-	-	-	-
OAR8_23796639.1	0.0159513	A	T	0.3904	A	T	0.493	0.1026	8	21548142	MODIFIER	DSE	ENSOARG00020004597	Transcript	ENSOART00020007029.2	protein_coding	-	2/5	-	-	-	-	-	-	-	-	A	A/T	-	-1	-	HGNC	HGNC:21144	-	-	-	-	-	-	-	-
OAR8_23796639.1	0.0159513	A	T	0.3904	A	T	0.493	0.1026	8	21548142	MODIFIER	DSE	ENSOARG00020004597	Transcript	ENSOART00020007083.2	protein_coding	-	2/4	-	-	-	-	-	-	-	-	A	A/T	-	-1	-	HGNC	HGNC:21144	-	-	-	-	-	-	-	-
OAR8_23796639.1	0.0159513	A	T	0.3904	A	T	0.493	0.1026	8	21548142	MODIFIER	DSE	ENSOARG00020004597	Transcript	ENSOART00020007088.2	protein_coding	-	2/3	-	-	-	-	-	-	-	-	A	A/T	-	-1	-	HGNC	HGNC:21144	-	-	-	-	-	-	-	-
OAR8_23796639.1	0.0159513	A	T	0.3904	A	T	0.493	0.1026	8	21548142	MODIFIER	DSE	ENSOARG00020004597	Transcript	ENSOART00020056249.1	protein_coding	-	2/6	-	-	-	-	-	-	-	-	A	A/T	-	-1	-	HGNC	HGNC:21144	-	-	-	-	-	-	-	-
oar3_OAR19_37697123	0.0159736	T	G	0.3343	T	G	0.2308	0.1035	19	37804863	MODIFIER	-	ENSOARG00020038846	Transcript	ENSOART00020046078.1	protein_coding	-	2/5	-	-	-	-	-	-	-	-	T	T/G	-	-1	-	-	-	-	-	-	-	-	-	-	-
oar3_OAR16_20651691	0.0159819	G	T	0.4579	G	T	0.3531	0.1048	16	20788440	MODIFIER	RAB3C	ENSOARG00020008775	Transcript	ENSOART00020013532.2	protein_coding	-	3/4	-	-	-	-	-	-	-	rs403591797	G	G/T	-	-1	-	Uniprot_gn	-	-	-	-	-	-	-	-	-
oar3_OAR16_20651691	0.0159819	G	T	0.4579	G	T	0.3531	0.1048	16	20788440	MODIFIER	RAB3C	ENSOARG00020008775	Transcript	ENSOART00020048135.1	protein_coding	-	3/4	-	-	-	-	-	-	-	rs403591797	G	G/T	-	-1	-	Uniprot_gn	-	-	-	-	-	-	-	-	-
OAR12_62671612.1	0.0161287	C	T	0.236	C	T	0.3322	0.0962	12	57648509	MODIFIER	ASTN1	ENSOARG00020019347	Transcript	ENSOART00020029920.2	protein_coding	-	2/22	-	-	-	-	-	-	-	rs422987960	C	C/T	-	-1	-	HGNC	HGNC:773	-	-	-	-	-	-	-	-
OAR12_62671612.1	0.0161287	C	T	0.236	C	T	0.3322	0.0962	12	57648509	MODIFIER	ASTN1	ENSOARG00020019347	Transcript	ENSOART00020062330.1	protein_coding	-	2/21	-	-	-	-	-	-	-	rs422987960	C	C/T	-	-1	-	HGNC	HGNC:773	-	-	-	-	-	-	-	-
oar3_OAR20_30992866	0.0161671	C	T	0.3174	C	T	0.4301	0.1127	20	31048812	MODIFIER	SLC17A1	ENSOARG00020007757	Transcript	ENSOART00020012103.2	protein_coding	-	-	-	-	-	-	-	-	-	rs415083090	C	C/T	1539	1	-	Uniprot_gn	-	-	-	-	-	-	-	-	-
oar3_OAR20_30992866	0.0161671	C	T	0.3174	C	T	0.4301	0.1127	20	31048812	MODIFIER	SLC17A1	ENSOARG00020007757	Transcript	ENSOART00020012169.2	protein_coding	-	-	-	-	-	-	-	-	-	rs415083090	C	C/T	1539	1	-	Uniprot_gn	-	-	-	-	-	-	-	-	-
s62481.1	0.0163426	A	G	0.1994	A	G	0.2993	0.0999	2	246987902	MODIFIER	CAPZB	ENSOARG00020007453	Transcript	ENSOART00020011480.2	protein_coding	-	2/8	-	-	-	-	-	-	-	-	A	A/G	-	1	-	HGNC	HGNC:1491	-	-	-	-	-	-	-	-
s62481.1	0.0163426	A	G	0.1994	A	G	0.2993	0.0999	2	246987902	MODIFIER	CAPZB	ENSOARG00020007453	Transcript	ENSOART00020011566.2	protein_coding	-	2/8	-	-	-	-	-	-	-	-	A	A/G	-	1	-	HGNC	HGNC:1491	-	-	-	-	-	-	-	-
s62481.1	0.0163426	A	G	0.1994	A	G	0.2993	0.0999	2	246987902	MODIFIER	CAPZB	ENSOARG00020007453	Transcript	ENSOART00020011596.2	protein_coding	-	2/9	-	-	-	-	-	-	-	-	A	A/G	-	1	-	HGNC	HGNC:1491	-	-	-	-	-	-	-	-
OAR22_53124914.1	0.0163635	T	C	0.4237	C	T	0.4615	0.1148	22	48157472	MODIFIER	-	-	-	-	-	-	-	-	-	-	-	-	-	-	rs408191757	T	T/C	-	-	-	-	-	-	-	-	-	-	-	-	-
OAR3_55503740.1	0.0164406	A	G	0.3792	A	G	0.2762	0.103	3	52685889	MODIFIER	-	-	-	-	-	-	-	-	-	-	-	-	-	-	-	A	A/G	-	-	-	-	-	-	-	-	-	-	-	-	-
OAR2_255709300.1	0.0165493	A	G	0.3764	G	A	0.479	0.1446	2	242691595	MODIFIER	-	ENSOARG00020012698	Transcript	ENSOART00020019389.2	protein_coding	-	-	-	-	-	-	-	-	-	rs417479093	A	A/G	2993	1	-	-	-	-	-	-	-	-	-	-	-
OAR2_255709300.1	0.0165493	A	G	0.3764	G	A	0.479	0.1446	2	242691595	MODIFIER	-	ENSOARG00020012698	Transcript	ENSOART00020019431.2	protein_coding	-	-	-	-	-	-	-	-	-	rs417479093	A	A/G	1745	1	-	-	-	-	-	-	-	-	-	-	-
OAR2_255709300.1	0.0165493	A	G	0.3764	G	A	0.479	0.1446	2	242691595	MODIFIER	-	ENSOARG00020012698	Transcript	ENSOART00020075001.1	protein_coding	-	-	-	-	-	-	-	-	-	rs417479093	A	A/G	702	1	-	-	-	-	-	-	-	-	-	-	-
OAR2_255709300.1	0.0165493	A	G	0.3764	G	A	0.479	0.1446	2	242691595	MODIFIER	PNRC2	ENSOARG00020038033	Transcript	ENSOART00020041719.1	protein_coding	3/3	-	-	-	2849	-	-	-	-	rs417479093	A	A/G	-	-1	-	HGNC	HGNC:23158	-	-	-	-	-	-	-	-
OAR2_255709300.1	0.0165493	A	G	0.3764	G	A	0.479	0.1446	2	242691595	MODIFIER	PNRC2	ENSOARG00020038033	Transcript	ENSOART00020061523.1	protein_coding	-	-	-	-	-	-	-	-	-	rs417479093	A	A/G	461	-1	-	HGNC	HGNC:23158	-	-	-	-	-	-	-	-
OAR2_255709300.1	0.0165493	A	G	0.3764	G	A	0.479	0.1446	2	242691595	MODIFIER	PNRC2	ENSOARG00020038033	Transcript	ENSOART00020067422.1	protein_coding	3/3	-	-	-	3453	-	-	-	-	rs417479093	A	A/G	-	-1	-	HGNC	HGNC:23158	-	-	-	-	-	-	-	-
OAR2_255709300.1	0.0165493	A	G	0.3764	G	A	0.479	0.1446	2	242691595	MODIFIER	PNRC2	ENSOARG00020038033	Transcript	ENSOART00020077743.1	protein_coding	-	-	-	-	-	-	-	-	-	rs417479093	A	A/G	464	-1	-	HGNC	HGNC:23158	-	-	-	-	-	-	-	-
oar3_OAR19_55209182	0.0166558	C	T	0.2753	C	T	0.1783	0.097	19	55281853	MODIFIER	ATG7	ENSOARG00020025688	Transcript	ENSOART00020040306.2	protein_coding	-	1/16	-	-	-	-	-	-	-	-	C	C/T	-	1	-	HGNC	HGNC:16935	-	-	-	-	-	-	-	-
oar3_OAR19_55209182	0.0166558	C	T	0.2753	C	T	0.1783	0.097	19	55281853	MODIFIER	ATG7	ENSOARG00020025688	Transcript	ENSOART00020040314.2	protein_coding	-	1/17	-	-	-	-	-	-	-	-	C	C/T	-	1	-	HGNC	HGNC:16935	-	-	-	-	-	-	-	-
oar3_OAR19_55209182	0.0166558	C	T	0.2753	C	T	0.1783	0.097	19	55281853	MODIFIER	ATG7	ENSOARG00020025688	Transcript	ENSOART00020040319.2	protein_coding	-	1/16	-	-	-	-	-	-	-	-	C	C/T	-	1	-	HGNC	HGNC:16935	-	-	-	-	-	-	-	-
oar3_OAR19_55209182	0.0166558	C	T	0.2753	C	T	0.1783	0.097	19	55281853	MODIFIER	ATG7	ENSOARG00020025688	Transcript	ENSOART00020052030.1	protein_coding	-	-	-	-	-	-	-	-	-	-	C	C/T	730	1	-	HGNC	HGNC:16935	-	-	-	-	-	-	-	-
oar3_OAR19_55209182	0.0166558	C	T	0.2753	C	T	0.1783	0.097	19	55281853	MODIFIER	ATG7	ENSOARG00020025688	Transcript	ENSOART00020055956.1	protein_coding	-	1/18	-	-	-	-	-	-	-	-	C	C/T	-	1	-	HGNC	HGNC:16935	-	-	-	-	-	-	-	-
oar3_OAR19_55209182	0.0166558	C	T	0.2753	C	T	0.1783	0.097	19	55281853	MODIFIER	ATG7	ENSOARG00020025688	Transcript	ENSOART00020061636.1	protein_coding	-	2/2	-	-	-	-	-	-	-	-	C	C/T	-	1	-	HGNC	HGNC:16935	-	-	-	-	-	-	-	-
oar3_OAR19_55209182	0.0166558	C	T	0.2753	C	T	0.1783	0.097	19	55281853	MODIFIER	ATG7	ENSOARG00020025688	Transcript	ENSOART00020074176.1	protein_coding	-	1/17	-	-	-	-	-	-	-	-	C	C/T	-	1	-	HGNC	HGNC:16935	-	-	-	-	-	-	-	-
oar3_OAR19_55209182	0.0166558	C	T	0.2753	C	T	0.1783	0.097	19	55281853	MODIFIER	ATG7	ENSOARG00020025688	Transcript	ENSOART00020075354.1	protein_coding	-	1/1	-	-	-	-	-	-	-	-	C	C/T	-	1	-	HGNC	HGNC:16935	-	-	-	-	-	-	-	-
oar3_OAR19_55209182	0.0166558	C	T	0.2753	C	T	0.1783	0.097	19	55281853	MODIFIER	ATG7	ENSOARG00020025688	Transcript	ENSOART00020078554.1	protein_coding	-	1/16	-	-	-	-	-	-	-	-	C	C/T	-	1	-	HGNC	HGNC:16935	-	-	-	-	-	-	-	-
oar3_OAR3_2637220	0.0166606	G	T	0.4494	T	G	0.451	0.0996	3	2767896	MODIFIER	-	ENSOARG00020002455	Transcript	ENSOART00020003774.2	protein_coding	-	-	-	-	-	-	-	-	-	rs427987284	G	G/T	1926	1	-	-	-	-	-	-	-	-	-	-	-
oar3_OAR3_2637220	0.0166606	G	T	0.4494	T	G	0.451	0.0996	3	2767896	MODIFIER	-	ENSOARG00020002455	Transcript	ENSOART00020068811.1	protein_coding	-	-	-	-	-	-	-	-	-	rs427987284	G	G/T	1926	1	-	-	-	-	-	-	-	-	-	-	-
oar3_OAR8_19004822	0.0169365	T	C	0.2247	T	C	0.3287	0.104	8	19186087	MODIFIER	-	-	-	-	-	-	-	-	-	-	-	-	-	-	-	T	T/C	-	-	-	-	-	-	-	-	-	-	-	-	-
s03132.1	0.0169937	C	T	0.3708	C	T	0.472	0.1012	17	18758911	MODIFIER	-	-	-	-	-	-	-	-	-	-	-	-	-	-	-	C	C/T	-	-	-	-	-	-	-	-	-	-	-	-	-
s66918.1	0.0170245	A	G	0.3729	A	G	0.4894	0.1165	1	249060155	MODIFIER	CLSTN2	ENSOARG00020009535	Transcript	ENSOART00020014786.2	protein_coding	-	8/16	-	-	-	-	-	-	-	-	A	A/G	-	-1	-	HGNC	HGNC:17448	-	-	-	-	-	-	-	-
s66918.1	0.0170245	A	G	0.3729	A	G	0.4894	0.1165	1	249060155	MODIFIER	CLSTN2	ENSOARG00020009535	Transcript	ENSOART00020046606.1	protein_coding	-	9/18	-	-	-	-	-	-	-	-	A	A/G	-	-1	-	HGNC	HGNC:17448	-	-	-	-	-	-	-	-
s41319.1	0.0171262	C	T	0.4382	C	T	0.3322	0.106	2	202342196	MODIFIER	-	ENSOARG00020040126	Transcript	ENSOART00020047657.1	lncRNA	-	-	-	-	-	-	-	-	-	-	C	C/T	1990	1	-	-	-	-	-	-	-	-	-	-	-
oar3_OAR26_35579417	0.017394	T	C	0.3343	T	C	0.2378	0.0965	26	36423609	MODIFIER	-	-	-	-	-	-	-	-	-	-	-	-	-	-	-	T	T/C	-	-	-	-	-	-	-	-	-	-	-	-	-
OAR14_23325311.1	0.0174931	C	T	0.3933	C	T	0.4965	0.1032	14	22681885	MODIFIER	-	-	-	-	-	-	-	-	-	-	-	-	-	-	-	C	C/T	-	-	-	-	-	-	-	-	-	-	-	-	-
OAR2_252793185.1	0.0175886	T	C	0.3399	T	C	0.451	0.1111	2	240181902	MODIFIER	ARID1A	ENSOARG00020022625	Transcript	ENSOART00020035316.2	protein_coding	-	1/19	-	-	-	-	-	-	-	-	T	T/C	-	-1	-	HGNC	HGNC:11110	-	-	-	-	-	-	-	-
OAR2_252793185.1	0.0175886	T	C	0.3399	T	C	0.451	0.1111	2	240181902	MODIFIER	ARID1A	ENSOARG00020022625	Transcript	ENSOART00020035437.2	protein_coding	-	1/19	-	-	-	-	-	-	-	-	T	T/C	-	-1	-	HGNC	HGNC:11110	-	-	-	-	-	-	-	-
OAR6_116994020.1	0.0177188	T	C	0.3034	T	C	0.4021	0.0987	6	116816799	MODIFIER	FAM193A	ENSOARG00020022278	Transcript	ENSOART00020034843.2	protein_coding	-	1/20	-	-	-	-	-	-	-	rs402285976	T	T/C	-	-1	-	HGNC	HGNC:16822	-	-	-	-	-	-	-	-
OAR6_116994020.1	0.0177188	T	C	0.3034	T	C	0.4021	0.0987	6	116816799	MODIFIER	FAM193A	ENSOARG00020022278	Transcript	ENSOART00020050613.1	protein_coding	1/19	-	-	-	39	-	-	-	-	rs402285976	T	T/C	-	-1	-	HGNC	HGNC:16822	-	-	-	-	-	-	-	-
OAR6_116994020.1	0.0177188	T	C	0.3034	T	C	0.4021	0.0987	6	116816799	MODIFIER	FAM193A	ENSOARG00020022278	Transcript	ENSOART00020055299.1	protein_coding	-	1/19	-	-	-	-	-	-	-	rs402285976	T	T/C	-	-1	-	HGNC	HGNC:16822	-	-	-	-	-	-	-	-
OAR6_116994020.1	0.0177188	T	C	0.3034	T	C	0.4021	0.0987	6	116816799	MODIFIER	FAM193A	ENSOARG00020022278	Transcript	ENSOART00020058001.1	protein_coding	-	2/21	-	-	-	-	-	-	-	rs402285976	T	T/C	-	-1	-	HGNC	HGNC:16822	-	-	-	-	-	-	-	-
OAR6_116994020.1	0.0177188	T	C	0.3034	T	C	0.4021	0.0987	6	116816799	MODIFIER	FAM193A	ENSOARG00020022278	Transcript	ENSOART00020078150.1	protein_coding	-	1/20	-	-	-	-	-	-	-	rs402285976	T	T/C	-	-1	-	HGNC	HGNC:16822	-	-	-	-	-	-	-	-
oar3_OAR6_11875628	0.0179321	C	T	0.4972	T	C	0.3881	0.1147	6	12135657	MODIFIER	-	-	-	-	-	-	-	-	-	-	-	-	-	-	-	C	C/T	-	-	-	-	-	-	-	-	-	-	-	-	-
oar3_OAR5_26912393	0.0179909	A	C	0.4438	C	A	0.458	0.0982	5	27133534	MODIFIER	-	ENSOARG00020038805	Transcript	ENSOART00020042987.1	lncRNA	-	4/4	-	-	-	-	-	-	-	-	A	A/C	-	1	-	-	-	-	-	-	-	-	-	-	-
oar3_OAR5_26912393	0.0179909	A	C	0.4438	C	A	0.458	0.0982	5	27133534	MODIFIER	-	ENSOARG00020031196	Transcript	ENSOART00020077516.1	lncRNA	1/2	-	-	-	831	-	-	-	-	-	A	A/C	-	1	-	-	-	-	-	-	-	-	-	-	-
oar3_OAR22_43612122	0.0180695	T	G	0.4494	T	G	0.3357	0.1137	22	44222549	MODIFIER	-	-	-	-	-	-	-	-	-	-	-	-	-	-	rs421368319	T	T/G	-	-	-	-	-	-	-	-	-	-	-	-	-
s62927.1	0.0181283	C	T	0.3539	C	T	0.2552	0.0987	3	63873090	MODIFIER	-	-	-	-	-	-	-	-	-	-	-	-	-	-	rs409037822	C	C/T	-	-	-	-	-	-	-	-	-	-	-	-	-
Chr9:13932939	0.0182414	A	C	0.4911	A	C	0.3934	0.0977	9	13948033	MODIFIER	SCRIB	ENSOARG00020010125	Transcript	ENSOART00020015504.2	protein_coding	-	18/34	-	-	-	-	-	-	-	rs402801671	A	A/C	-	1	-	HGNC	HGNC:30377	-	-	-	-	-	-	-	-
Chr9:13932939	0.0182414	A	C	0.4911	A	C	0.3934	0.0977	9	13948033	MODIFIER	SCRIB	ENSOARG00020010125	Transcript	ENSOART00020015881.2	protein_coding	-	18/34	-	-	-	-	-	-	-	rs402801671	A	A/C	-	1	-	HGNC	HGNC:30377	-	-	-	-	-	-	-	-
Chr9:13932939	0.0182414	A	C	0.4911	A	C	0.3934	0.0977	9	13948033	MODIFIER	SCRIB	ENSOARG00020010125	Transcript	ENSOART00020016248.2	protein_coding	-	17/33	-	-	-	-	-	-	-	rs402801671	A	A/C	-	1	-	HGNC	HGNC:30377	-	-	-	-	-	-	-	-
Chr9:13932939	0.0182414	A	C	0.4911	A	C	0.3934	0.0977	9	13948033	MODIFIER	SCRIB	ENSOARG00020010125	Transcript	ENSOART00020016607.2	protein_coding	-	18/35	-	-	-	-	-	-	-	rs402801671	A	A/C	-	1	-	HGNC	HGNC:30377	-	-	-	-	-	-	-	-
Chr9:13932939	0.0182414	A	C	0.4911	A	C	0.3934	0.0977	9	13948033	MODIFIER	SCRIB	ENSOARG00020010125	Transcript	ENSOART00020075532.1	protein_coding	-	18/34	-	-	-	-	-	-	-	rs402801671	A	A/C	-	1	-	HGNC	HGNC:30377	-	-	-	-	-	-	-	-
s48923.1	0.018242	G	A	0.4242	A	G	0.4615	0.1143	6	109081339	MODIFIER	-	-	-	-	-	-	-	-	-	-	-	-	-	-	-	G	G/A	-	-	-	-	-	-	-	-	-	-	-	-	-
Chr5:13525848	0.0187639	A	G	0.3285	A	G	0.4296	0.1011	5	13585944	MODIFIER	ECSIT	ENSOARG00020007078	Transcript	ENSOART00020010922.2	protein_coding	-	-	-	-	-	-	-	-	-	-	A	A/G	4133	-1	-	HGNC	HGNC:29548	-	-	-	-	-	-	-	-
Chr5:13525848	0.0187639	A	G	0.3285	A	G	0.4296	0.1011	5	13585944	MODIFIER	ECSIT	ENSOARG00020007078	Transcript	ENSOART00020011019.2	protein_coding	-	-	-	-	-	-	-	-	-	-	A	A/G	4173	-1	-	HGNC	HGNC:29548	-	-	-	-	-	-	-	-
Chr5:13525848	0.0187639	A	G	0.3285	A	G	0.4296	0.1011	5	13585944	MODIFIER	ZNF653	ENSOARG00020006974	Transcript	ENSOART00020010738.2	protein_coding	-	1/7	-	-	-	-	-	-	-	-	A	A/G	-	-1	-	HGNC	HGNC:25196	-	-	-	-	-	-	-	-
Chr5:13525848	0.0187639	A	G	0.3285	A	G	0.4296	0.1011	5	13585944	MODIFIER	ZNF653	ENSOARG00020006974	Transcript	ENSOART00020063519.1	protein_coding	-	1/6	-	-	-	-	-	-	-	-	A	A/G	-	-1	-	HGNC	HGNC:25196	-	-	-	-	-	-	-	-
Chr5:13525848	0.0187639	A	G	0.3285	A	G	0.4296	0.1011	5	13585944	MODIFIER	ZNF653	ENSOARG00020006974	Transcript	ENSOART00020071879.1	protein_coding	-	1/5	-	-	-	-	-	-	-	-	A	A/G	-	-1	-	HGNC	HGNC:25196	-	-	-	-	-	-	-	-
oar3_OAR13_61237853	0.0188544	G	A	0.3736	G	A	0.472	0.0984	13	61592376	MODIFIER	NOL4L	ENSOARG00020007261	Transcript	ENSOART00020011244.2	protein_coding	-	4/10	-	-	-	-	-	-	-	-	G	G/A	-	-1	-	HGNC	HGNC:16106	-	-	-	-	-	-	-	-
oar3_OAR13_61237853	0.0188544	G	A	0.3736	G	A	0.472	0.0984	13	61592376	MODIFIER	NOL4L	ENSOARG00020007261	Transcript	ENSOART00020011535.2	protein_coding	-	5/5	-	-	-	-	-	-	-	-	G	G/A	-	-1	-	HGNC	HGNC:16106	-	-	-	-	-	-	-	-
oar3_OAR16_19420661	0.0189037	C	T	0.304	C	T	0.2063	0.0977	16	19558118	MODIFIER	-	ENSOARG00020040960	Transcript	ENSOART00020056690.1	protein_coding	-	1/1	-	-	-	-	-	-	-	rs420840850	C	C/T	-	1	-	-	-	-	-	-	-	-	-	-	-
s26014.1	0.0190417	C	T	0.441	T	C	0.4615	0.0975	5	47689702	MODIFIER	CTNNA1	ENSOARG00020016402	Transcript	ENSOART00020025220.2	protein_coding	-	2/19	-	-	-	-	-	-	-	-	C	C/T	-	1	-	Uniprot_gn	-	-	-	-	-	-	-	-	-
s05470.1	0.0191492	G	T	0.4916	G	T	0.3601	0.1315	24	21989305	MODIFIER	-	-	-	-	-	-	-	-	-	-	-	-	-	-	rs429017208	G	G/T	-	-	-	-	-	-	-	-	-	-	-	-	-
OAR25_19769390.1	0.0192137	A	G	0.4691	G	A	0.4336	0.0973	25	18412997	MODIFIER	-	-	-	-	-	-	-	-	-	-	-	-	-	-	rs423532031	A	A/G	-	-	-	-	-	-	-	-	-	-	-	-	-
oar3_OAR3_10559516	0.0193316	A	G	0.4213	A	G	0.3252	0.0961	3	10620693	MODIFIER	MAPKAP1	ENSOARG00020006895	Transcript	ENSOART00020010597.2	protein_coding	-	11/12	-	-	-	-	-	-	-	-	A	A/G	-	1	-	Uniprot_gn	-	-	-	-	-	-	-	-	-
oar3_OAR3_10559516	0.0193316	A	G	0.4213	A	G	0.3252	0.0961	3	10620693	MODIFIER	MAPKAP1	ENSOARG00020006895	Transcript	ENSOART00020010656.2	protein_coding	-	11/12	-	-	-	-	-	-	-	-	A	A/G	-	1	-	Uniprot_gn	-	-	-	-	-	-	-	-	-
oar3_OAR3_171752283	0.0194556	G	A	0.3736	G	A	0.2727	0.1009	3	172272111	MODIFIER	PAH	ENSOARG00020010456	Transcript	ENSOART00020016172.2	protein_coding	-	1/12	-	-	-	-	-	-	-	rs425521027	G	G/A	-	-1	-	Uniprot_gn	-	-	-	-	-	-	-	-	-
oar3_OAR3_171752283	0.0194556	G	A	0.3736	G	A	0.2727	0.1009	3	172272111	MODIFIER	PAH	ENSOARG00020010456	Transcript	ENSOART00020043805.1	protein_coding	-	2/13	-	-	-	-	-	-	-	rs425521027	G	G/A	-	-1	-	Uniprot_gn	-	-	-	-	-	-	-	-	-
oar3_OAR7_27533923	0.0199273	G	T	0.4663	T	G	0.4371	0.0966	7	28725412	MODIFIER	-	-	-	-	-	-	-	-	-	-	-	-	-	-	-	G	G/T	-	-	-	-	-	-	-	-	-	-	-	-	-
oar3_OAR19_56355753	0.0199396	T	C	0.4775	C	T	0.4091	0.1134	19	56446399	MODIFIER	RAF1	ENSOARG00020025810	Transcript	ENSOART00020040544.2	protein_coding	-	2/19	-	-	-	-	-	-	-	-	T	T/C	-	1	-	HGNC	HGNC:9829	-	-	-	-	-	-	-	-
oar3_OAR19_56355753	0.0199396	T	C	0.4775	C	T	0.4091	0.1134	19	56446399	MODIFIER	RAF1	ENSOARG00020025810	Transcript	ENSOART00020040547.2	protein_coding	-	3/18	-	-	-	-	-	-	-	-	T	T/C	-	1	-	HGNC	HGNC:9829	-	-	-	-	-	-	-	-
oar3_OAR19_56355753	0.0199396	T	C	0.4775	C	T	0.4091	0.1134	19	56446399	MODIFIER	RAF1	ENSOARG00020025810	Transcript	ENSOART00020066448.1	protein_coding	-	1/1	-	-	-	-	-	-	-	-	T	T/C	-	1	-	HGNC	HGNC:9829	-	-	-	-	-	-	-	-
oar3_OAR19_56355753	0.0199396	T	C	0.4775	C	T	0.4091	0.1134	19	56446399	MODIFIER	RAF1	ENSOARG00020025810	Transcript	ENSOART00020066780.1	protein_coding	-	3/17	-	-	-	-	-	-	-	-	T	T/C	-	1	-	HGNC	HGNC:9829	-	-	-	-	-	-	-	-
oar3_OAR19_56355753	0.0199396	T	C	0.4775	C	T	0.4091	0.1134	19	56446399	MODIFIER	RAF1	ENSOARG00020025810	Transcript	ENSOART00020069213.1	protein_coding	-	3/17	-	-	-	-	-	-	-	-	T	T/C	-	1	-	HGNC	HGNC:9829	-	-	-	-	-	-	-	-
oar3_OAR19_56355753	0.0199396	T	C	0.4775	C	T	0.4091	0.1134	19	56446399	MODIFIER	RAF1	ENSOARG00020025810	Transcript	ENSOART00020073002.1	protein_coding	-	1/1	-	-	-	-	-	-	-	-	T	T/C	-	1	-	HGNC	HGNC:9829	-	-	-	-	-	-	-	-
s46792.1	0.0204447	G	A	0.3136	G	A	0.4286	0.115	23	776484	MODIFIER	KCNG2	ENSOARG00020012110	Transcript	ENSOART00020018498.2	protein_coding	-	-	-	-	-	-	-	-	-	-	G	G/A	1238	-1	-	HGNC	HGNC:6249	-	-	-	-	-	-	-	-
s46792.1	0.0204447	G	A	0.3136	G	A	0.4286	0.115	23	776484	MODIFIER	SLC66A2	ENSOARG00020011960	Transcript	ENSOART00020018290.2	protein_coding	-	-	-	-	-	-	-	-	-	-	G	G/A	1376	1	-	HGNC	HGNC:26188	-	-	-	-	-	-	-	-
s46792.1	0.0204447	G	A	0.3136	G	A	0.4286	0.115	23	776484	MODIFIER	SLC66A2	ENSOARG00020011960	Transcript	ENSOART00020018357.2	protein_coding	-	-	-	-	-	-	-	-	-	-	G	G/A	1381	1	-	HGNC	HGNC:26188	-	-	-	-	-	-	-	-
s46792.1	0.0204447	G	A	0.3136	G	A	0.4286	0.115	23	776484	MODIFIER	SLC66A2	ENSOARG00020011960	Transcript	ENSOART00020018389.2	protein_coding	-	-	-	-	-	-	-	-	-	-	G	G/A	2808	1	-	HGNC	HGNC:26188	-	-	-	-	-	-	-	-
oar3_OAR2_238730681	0.0205357	A	G	0.2303	A	G	0.3287	0.0984	2	239589188	MODIFIER	U6	ENSOARG00020040271	Transcript	ENSOART00020032742.2	snRNA	-	-	-	-	-	-	-	-	-	rs422360794	A	A/G	4647	-1	-	RFAM	-	-	-	-	-	-	-	-	-
oar3_OAR2_238730681	0.0205357	A	G	0.2303	A	G	0.3287	0.0984	2	239589188	MODIFIER	WASF2	ENSOARG00020021160	Transcript	ENSOART00020032664.2	protein_coding	-	1/9	-	-	-	-	-	-	-	rs422360794	A	A/G	-	1	-	HGNC	HGNC:12733	-	-	-	-	-	-	-	-
oar3_OAR2_238730681	0.0205357	A	G	0.2303	A	G	0.3287	0.0984	2	239589188	MODIFIER	WASF2	ENSOARG00020021160	Transcript	ENSOART00020032696.2	protein_coding	-	1/7	-	-	-	-	-	-	-	rs422360794	A	A/G	-	1	-	HGNC	HGNC:12733	-	-	-	-	-	-	-	-
oar3_OAR2_238730681	0.0205357	A	G	0.2303	A	G	0.3287	0.0984	2	239589188	MODIFIER	WASF2	ENSOARG00020021160	Transcript	ENSOART00020051668.1	protein_coding	-	1/8	-	-	-	-	-	-	-	rs422360794	A	A/G	-	1	-	HGNC	HGNC:12733	-	-	-	-	-	-	-	-
oar3_OAR12_1624220	0.020785	G	A	0.4298	G	A	0.3227	0.1071	12	2181735	MODIFIER	-	-	-	-	-	-	-	-	-	-	-	-	-	-	rs401019432	G	G/A	-	-	-	-	-	-	-	-	-	-	-	-	-
s06048.1	0.0209428	G	A	0.427	A	G	0.472	0.101	26	36689780	MODIFIER	SMIM19	ENSOARG00020025670	Transcript	ENSOART00020040279.2	protein_coding	-	-	-	-	-	-	-	-	-	-	G	G/A	4803	1	-	Uniprot_gn	-	-	-	-	-	-	-	-	-
s06048.1	0.0209428	G	A	0.427	A	G	0.472	0.101	26	36689780	MODIFIER	SMIM19	ENSOARG00020025670	Transcript	ENSOART00020079597.1	protein_coding	-	-	-	-	-	-	-	-	-	-	G	G/A	4812	1	-	Uniprot_gn	-	-	-	-	-	-	-	-	-
s06048.1	0.0209428	G	A	0.427	A	G	0.472	0.101	26	36689780	MODIFIER	SMIM19	ENSOARG00020025670	Transcript	ENSOART00020081597.1	protein_coding	-	-	-	-	-	-	-	-	-	-	G	G/A	4984	1	-	Uniprot_gn	-	-	-	-	-	-	-	-	-
oar3_OAR1_237234209	0.0209855	T	C	0.2442	T	C	0.3404	0.0962	1	239925911	MODIFIER	GYG1	ENSOARG00020005658	Transcript	ENSOART00020008698.2	protein_coding	-	-	-	-	-	-	-	-	-	-	T	T/C	591	-1	-	HGNC	HGNC:4699	-	-	-	-	-	-	-	-
oar3_OAR1_237234209	0.0209855	T	C	0.2442	T	C	0.3404	0.0962	1	239925911	MODIFIER	GYG1	ENSOARG00020005658	Transcript	ENSOART00020008729.2	protein_coding	-	-	-	-	-	-	-	-	-	-	T	T/C	714	-1	-	HGNC	HGNC:4699	-	-	-	-	-	-	-	-
oar3_OAR1_237234209	0.0209855	T	C	0.2442	T	C	0.3404	0.0962	1	239925911	MODIFIER	GYG1	ENSOARG00020005658	Transcript	ENSOART00020079901.1	protein_coding	-	-	-	-	-	-	-	-	-	-	T	T/C	714	-1	-	HGNC	HGNC:4699	-	-	-	-	-	-	-	-
oar3_OAR1_124302792	0.0210013	T	G	0.3848	T	G	0.493	0.1082	1	126725213	MODIFIER	-	ENSOARG00020030468	Transcript	ENSOART00020047133.1	protein_coding	-	1/2	-	-	-	-	-	-	-	rs402506113	T	T/G	-	1	-	-	-	-	-	-	-	-	-	-	-
oar3_OAR1_124302792	0.0210013	T	G	0.3848	T	G	0.493	0.1082	1	126725213	MODIFIER	GRIK1	ENSOARG00020001801	Transcript	ENSOART00020004341.2	protein_coding	-	1/17	-	-	-	-	-	-	-	rs402506113	T	T/G	-	1	-	HGNC	HGNC:4579	-	-	-	-	-	-	-	-
oar3_OAR1_124302792	0.0210013	T	G	0.3848	T	G	0.493	0.1082	1	126725213	MODIFIER	GRIK1	ENSOARG00020001801	Transcript	ENSOART00020004354.2	protein_coding	-	1/15	-	-	-	-	-	-	-	rs402506113	T	T/G	-	1	-	HGNC	HGNC:4579	-	-	-	-	-	-	-	-
oar3_OAR1_124302792	0.0210013	T	G	0.3848	T	G	0.493	0.1082	1	126725213	MODIFIER	GRIK1	ENSOARG00020001801	Transcript	ENSOART00020004366.2	protein_coding	-	1/16	-	-	-	-	-	-	-	rs402506113	T	T/G	-	1	-	HGNC	HGNC:4579	-	-	-	-	-	-	-	-
oar3_OAR1_124302792	0.0210013	T	G	0.3848	T	G	0.493	0.1082	1	126725213	MODIFIER	GRIK1	ENSOARG00020001801	Transcript	ENSOART00020004378.2	protein_coding	-	1/16	-	-	-	-	-	-	-	rs402506113	T	T/G	-	1	-	HGNC	HGNC:4579	-	-	-	-	-	-	-	-
oar3_OAR1_124302792	0.0210013	T	G	0.3848	T	G	0.493	0.1082	1	126725213	MODIFIER	GRIK1	ENSOARG00020001801	Transcript	ENSOART00020004398.2	protein_coding	-	1/16	-	-	-	-	-	-	-	rs402506113	T	T/G	-	1	-	HGNC	HGNC:4579	-	-	-	-	-	-	-	-
oar3_OAR2_220656501	0.0211026	A	G	0.4775	A	G	0.3706	0.1069	2	221673316	MODIFIER	-	ENSOARG00020031227	Transcript	ENSOART00020057606.1	lncRNA	-	3/3	-	-	-	-	-	-	-	-	A	A/G	-	1	-	-	-	-	-	-	-	-	-	-	-
OAR17_61590918.1	0.0211655	T	C	0.4916	T	C	0.3322	0.1594	17	56960677	MODIFIER	-	-	-	-	-	-	-	-	-	-	-	-	-	-	rs398360598	T	T/C	-	-	-	-	-	-	-	-	-	-	-	-	-
oar3_OAR17_56607940	0.0211655	A	C	0.4916	A	C	0.3322	0.1594	17	57049430	MODIFIER	-	ENSOARG00020010362	Transcript	ENSOART00020016120.2	protein_coding	-	10/17	-	-	-	-	-	-	-	-	A	A/C	-	1	-	-	-	-	-	-	-	-	-	-	-
oar3_OAR17_56607940	0.0211655	A	C	0.4916	A	C	0.3322	0.1594	17	57049430	MODIFIER	-	ENSOARG00020010362	Transcript	ENSOART00020042860.1	protein_coding	-	11/17	-	-	-	-	-	-	-	-	A	A/C	-	1	-	-	-	-	-	-	-	-	-	-	-
oar3_OAR17_56607940	0.0211655	A	C	0.4916	A	C	0.3322	0.1594	17	57049430	MODIFIER	-	ENSOARG00020010362	Transcript	ENSOART00020053140.1	protein_coding	-	11/18	-	-	-	-	-	-	-	-	A	A/C	-	1	-	-	-	-	-	-	-	-	-	-	-
oar3_OAR17_56607940	0.0211655	A	C	0.4916	A	C	0.3322	0.1594	17	57049430	MODIFIER	-	ENSOARG00020010362	Transcript	ENSOART00020067326.1	protein_coding	-	6/13	-	-	-	-	-	-	-	-	A	A/C	-	1	-	-	-	-	-	-	-	-	-	-	-
Chr22:44940128	0.021195	G	A	0.4407	A	G	0.4472	0.1121	22	45500154	MODERATE	C10orf90	ENSOARG00020024101	Transcript	ENSOART00020037670.2	protein_coding	4/10	-	-	-	699	500	167	P/L	cCg/cTg	-	G	G/A	-	-1	-	HGNC	HGNC:26563	-	-	-	-	-	-	-	-
Chr22:44940128	0.021195	G	A	0.4407	A	G	0.4472	0.1121	22	45500154	MODERATE	C10orf90	ENSOARG00020024101	Transcript	ENSOART00020037681.2	protein_coding	3/9	-	-	-	385	233	78	P/L	cCg/cTg	-	G	G/A	-	-1	-	HGNC	HGNC:26563	-	-	-	-	-	-	-	-
Chr22:44940128	0.021195	G	A	0.4407	A	G	0.4472	0.1121	22	45500154	MODERATE	C10orf90	ENSOARG00020024101	Transcript	ENSOART00020071574.1	protein_coding	3/8	-	-	-	294	68	23	P/L	cCg/cTg	-	G	G/A	-	-1	-	HGNC	HGNC:26563	-	-	-	-	-	-	-	-
s49127.1	0.0214058	C	T	0.3362	C	T	0.2378	0.0984	19	19168847	MODIFIER	GRM7	ENSOARG00020011716	Transcript	ENSOART00020018200.2	protein_coding	-	2/9	-	-	-	-	-	-	-	rs426537440	C	C/T	-	-1	-	HGNC	HGNC:4599	-	-	-	-	-	-	-	-
s49127.1	0.0214058	C	T	0.3362	C	T	0.2378	0.0984	19	19168847	MODIFIER	GRM7	ENSOARG00020011716	Transcript	ENSOART00020018256.2	protein_coding	-	2/9	-	-	-	-	-	-	-	rs426537440	C	C/T	-	-1	-	HGNC	HGNC:4599	-	-	-	-	-	-	-	-
s49127.1	0.0214058	C	T	0.3362	C	T	0.2378	0.0984	19	19168847	MODIFIER	GRM7	ENSOARG00020011716	Transcript	ENSOART00020018342.2	protein_coding	-	2/10	-	-	-	-	-	-	-	rs426537440	C	C/T	-	-1	-	HGNC	HGNC:4599	-	-	-	-	-	-	-	-
s49127.1	0.0214058	C	T	0.3362	C	T	0.2378	0.0984	19	19168847	MODIFIER	GRM7	ENSOARG00020011716	Transcript	ENSOART00020042925.1	protein_coding	-	2/9	-	-	-	-	-	-	-	rs426537440	C	C/T	-	-1	-	HGNC	HGNC:4599	-	-	-	-	-	-	-	-
s49127.1	0.0214058	C	T	0.3362	C	T	0.2378	0.0984	19	19168847	MODIFIER	GRM7	ENSOARG00020011716	Transcript	ENSOART00020074668.1	protein_coding	-	2/8	-	-	-	-	-	-	-	rs426537440	C	C/T	-	-1	-	HGNC	HGNC:4599	-	-	-	-	-	-	-	-
oar3_OAR12_59358266	0.0215082	C	T	0.3202	C	T	0.4266	0.1064	12	60684708	MODIFIER	-	ENSOARG00020032115	Transcript	ENSOART00020048709.1	protein_coding	-	1/1	-	-	-	-	-	-	-	rs422966343	C	C/T	-	1	-	-	-	-	-	-	-	-	-	-	-
oar3_OAR12_59358266	0.0215082	C	T	0.3202	C	T	0.4266	0.1064	12	60684708	MODIFIER	-	ENSOARG00020028129	Transcript	ENSOART00020063865.1	protein_coding	-	-	-	-	-	-	-	-	-	rs422966343	C	C/T	3323	1	-	-	-	-	-	-	-	-	-	-	-
oar3_OAR12_59358266	0.0215082	C	T	0.3202	C	T	0.4266	0.1064	12	60684708	MODIFIER	CEP350	ENSOARG00020023084	Transcript	ENSOART00020035870.2	protein_coding	-	30/37	-	-	-	-	-	-	-	rs422966343	C	C/T	-	1	-	HGNC	HGNC:24238	-	-	-	-	-	-	-	-
oar3_OAR12_59358266	0.0215082	C	T	0.3202	C	T	0.4266	0.1064	12	60684708	MODIFIER	CEP350	ENSOARG00020023084	Transcript	ENSOART00020036038.2	protein_coding	-	30/37	-	-	-	-	-	-	-	rs422966343	C	C/T	-	1	-	HGNC	HGNC:24238	-	-	-	-	-	-	-	-
oar3_OAR12_59358266	0.0215082	C	T	0.3202	C	T	0.4266	0.1064	12	60684708	MODIFIER	CEP350	ENSOARG00020023084	Transcript	ENSOART00020036207.2	protein_coding	-	31/38	-	-	-	-	-	-	-	rs422966343	C	C/T	-	1	-	HGNC	HGNC:24238	-	-	-	-	-	-	-	-
oar3_OAR12_33905561	0.0215834	T	G	0.309	T	G	0.2042	0.1048	12	35030188	MODIFIER	RGS7	ENSOARG00020006899	Transcript	ENSOART00020011540.2	protein_coding	-	3/16	-	-	-	-	-	-	-	-	T	T/G	-	1	-	HGNC	HGNC:10003	-	-	-	-	-	-	-	-
oar3_OAR12_33905561	0.0215834	T	G	0.309	T	G	0.2042	0.1048	12	35030188	MODIFIER	RGS7	ENSOARG00020006899	Transcript	ENSOART00020011595.2	protein_coding	-	3/16	-	-	-	-	-	-	-	-	T	T/G	-	1	-	HGNC	HGNC:10003	-	-	-	-	-	-	-	-
oar3_OAR12_33905561	0.0215834	T	G	0.309	T	G	0.2042	0.1048	12	35030188	MODIFIER	RGS7	ENSOARG00020006899	Transcript	ENSOART00020011621.2	protein_coding	-	3/15	-	-	-	-	-	-	-	-	T	T/G	-	1	-	HGNC	HGNC:10003	-	-	-	-	-	-	-	-
oar3_OAR12_33905561	0.0215834	T	G	0.309	T	G	0.2042	0.1048	12	35030188	MODIFIER	RGS7	ENSOARG00020006899	Transcript	ENSOART00020045845.1	protein_coding	-	3/15	-	-	-	-	-	-	-	-	T	T/G	-	1	-	HGNC	HGNC:10003	-	-	-	-	-	-	-	-
oar3_OAR12_33905561	0.0215834	T	G	0.309	T	G	0.2042	0.1048	12	35030188	MODIFIER	RGS7	ENSOARG00020006899	Transcript	ENSOART00020051955.1	protein_coding	-	3/15	-	-	-	-	-	-	-	-	T	T/G	-	1	-	HGNC	HGNC:10003	-	-	-	-	-	-	-	-
oar3_OAR12_33905561	0.0215834	T	G	0.309	T	G	0.2042	0.1048	12	35030188	MODIFIER	RGS7	ENSOARG00020006899	Transcript	ENSOART00020056188.1	protein_coding	-	1/13	-	-	-	-	-	-	-	-	T	T/G	-	1	-	HGNC	HGNC:10003	-	-	-	-	-	-	-	-
oar3_OAR12_33905561	0.0215834	T	G	0.309	T	G	0.2042	0.1048	12	35030188	MODIFIER	RGS7	ENSOARG00020006899	Transcript	ENSOART00020078084.1	protein_coding	-	3/16	-	-	-	-	-	-	-	-	T	T/G	-	1	-	HGNC	HGNC:10003	-	-	-	-	-	-	-	-
oar3_OAR1_32656859	0.0216157	G	A	0.4635	G	A	0.3566	0.1069	1	32907545	MODIFIER	-	-	-	-	-	-	-	-	-	-	-	-	-	-	-	G	G/A	-	-	-	-	-	-	-	-	-	-	-	-	-
oar3_OAR10_79186980	0.0216281	C	G	0.441	C	G	0.3357	0.1053	10	79192946	MODIFIER	-	-	-	-	-	-	-	-	-	-	-	-	-	-	-	C	C/G	-	-	-	-	-	-	-	-	-	-	-	-	-
OAR20_7215413.1	0.0217044	A	C	0.3657	A	C	0.4683	0.1026	20	7175926	MODIFIER	-	-	-	-	-	-	-	-	-	-	-	-	-	-	-	A	A/C	-	-	-	-	-	-	-	-	-	-	-	-	-
Chr2:155440709	0.0219719	G	T	0.3315	G	T	0.2203	0.1112	2	156633658	MODIFIER	-	-	-	-	-	-	-	-	-	-	-	-	-	-	rs420403502	G	G/T	-	-	-	-	-	-	-	-	-	-	-	-	-
OAR1_292328555.1	0.0220618	A	G	0.2921	A	G	0.3951	0.103	1	272891777	MODIFIER	COL6A5	ENSOARG00020019139	Transcript	ENSOART00020029451.2	protein_coding	-	37/39	-	-	-	-	-	-	-	rs407145724	A	A/G	-	-1	-	HGNC	HGNC:26674	-	-	-	-	-	-	-	-
OAR1_292328555.1	0.0220618	A	G	0.2921	A	G	0.3951	0.103	1	272891777	MODIFIER	COL6A5	ENSOARG00020019139	Transcript	ENSOART00020056743.1	protein_coding	-	37/40	-	-	-	-	-	-	-	rs407145724	A	A/G	-	-1	-	HGNC	HGNC:26674	-	-	-	-	-	-	-	-
oar3_OAR9_4921492	0.0221317	G	A	0.3324	G	A	0.4424	0.11	9	4761046	MODIFIER	-	-	-	-	-	-	-	-	-	-	-	-	-	-	-	G	G/A	-	-	-	-	-	-	-	-	-	-	-	-	-
oar3_OAR17_14647514	0.022204	C	T	0.4635	T	C	0.4301	0.1064	17	15037615	MODIFIER	-	-	-	-	-	-	-	-	-	-	-	-	-	-	-	C	C/T	-	-	-	-	-	-	-	-	-	-	-	-	-
Chr22:44939724	0.0222464	T	C	0.4438	C	T	0.4441	0.1121	22	45499750	MODERATE	C10orf90	ENSOARG00020024101	Transcript	ENSOART00020037670.2	protein_coding	4/10	-	-	-	1103	904	302	K/E	Aag/Gag	rs430789665	T	T/C	-	-1	-	HGNC	HGNC:26563	-	-	-	-	tolerated(1)	-	-	-
Chr22:44939724	0.0222464	T	C	0.4438	C	T	0.4441	0.1121	22	45499750	MODERATE	C10orf90	ENSOARG00020024101	Transcript	ENSOART00020037681.2	protein_coding	3/9	-	-	-	789	637	213	K/E	Aag/Gag	rs430789665	T	T/C	-	-1	-	HGNC	HGNC:26563	-	-	-	-	tolerated(1)	-	-	-
Chr22:44939724	0.0222464	T	C	0.4438	C	T	0.4441	0.1121	22	45499750	MODERATE	C10orf90	ENSOARG00020024101	Transcript	ENSOART00020071574.1	protein_coding	3/8	-	-	-	698	472	158	K/E	Aag/Gag	rs430789665	T	T/C	-	-1	-	HGNC	HGNC:26563	-	-	-	-	tolerated(1)	-	-	-
s41349.1	0.0222501	A	G	0.4944	G	A	0.3986	0.107	6	102181407	MODIFIER	-	ENSOARG00020019244	Transcript	ENSOART00020029545.2	protein_coding	-	-	-	-	-	-	-	-	-	rs405549013	A	A/G	4227	1	-	-	-	-	-	-	-	-	-	-	-
OAR2_143449246.1	0.0222709	G	A	0.3483	G	A	0.4476	0.0993	2	135982645	MODIFIER	-	ENSOARG00020030830	Transcript	ENSOART00020043381.1	protein_coding	1/2	-	-	-	4032	-	-	-	-	-	G	G/A	-	1	-	-	-	-	-	-	-	-	-	-	-
OAR2_143449246.1	0.0222709	G	A	0.3483	G	A	0.4476	0.0993	2	135982645	MODIFIER	-	ENSOARG00020030830	Transcript	ENSOART00020066533.1	protein_coding	-	-	-	-	-	-	-	-	-	-	G	G/A	408	1	-	-	-	-	-	-	-	-	-	-	-
OAR2_143449246.1	0.0222709	G	A	0.3483	G	A	0.4476	0.0993	2	135982645	MODIFIER	-	ENSOARG00020030830	Transcript	ENSOART00020070471.1	protein_coding	-	1/1	-	-	-	-	-	-	-	-	G	G/A	-	1	-	-	-	-	-	-	-	-	-	-	-
OAR2_143449246.1	0.0222709	G	A	0.3483	G	A	0.4476	0.0993	2	135982645	MODIFIER	-	ENSOARG00020030830	Transcript	ENSOART00020074550.1	protein_coding	-	1/1	-	-	-	-	-	-	-	-	G	G/A	-	1	-	-	-	-	-	-	-	-	-	-	-
s24590.1	0.0227272	G	A	0.4132	G	A	0.3148	0.0984	22	43116487	MODIFIER	CPXM2	ENSOARG00020022962	Transcript	ENSOART00020035656.2	protein_coding	-	2/13	-	-	-	-	-	-	-	rs405451873	G	G/A	-	-1	-	HGNC	HGNC:26977	-	-	-	-	-	-	-	-
s24590.1	0.0227272	G	A	0.4132	G	A	0.3148	0.0984	22	43116487	MODIFIER	CPXM2	ENSOARG00020022962	Transcript	ENSOART00020080929.1	protein_coding	-	1/12	-	-	-	-	-	-	-	rs405451873	G	G/A	-	-1	-	HGNC	HGNC:26977	-	-	-	-	-	-	-	-
Chr16:44197834	0.0227807	A	C	0.3457	A	C	0.4472	0.1015	16	44452176	MODIFIER	-	-	-	-	-	-	-	-	-	-	-	-	-	-	-	A	A/C	-	-	-	-	-	-	-	-	-	-	-	-	-
oar3_OAR12_56220894	0.022823	C	T	0.4185	T	C	0.4615	0.12	12	57552270	MODIFIER	ASTN1	ENSOARG00020019347	Transcript	ENSOART00020029920.2	protein_coding	-	8/22	-	-	-	-	-	-	-	-	C	C/T	-	-1	-	HGNC	HGNC:773	-	-	-	-	-	-	-	-
oar3_OAR12_56220894	0.022823	C	T	0.4185	T	C	0.4615	0.12	12	57552270	MODIFIER	ASTN1	ENSOARG00020019347	Transcript	ENSOART00020062330.1	protein_coding	-	8/21	-	-	-	-	-	-	-	-	C	C/T	-	-1	-	HGNC	HGNC:773	-	-	-	-	-	-	-	-
OAR1_83683955.1	0.0228732	A	G	0.4719	G	A	0.4161	0.112	1	79224667	MODIFIER	-	-	-	-	-	-	-	-	-	-	-	-	-	-	rs399029318	A	A/G	-	-	-	-	-	-	-	-	-	-	-	-	-
OAR6_110419866.1	0.0228913	A	G	0.4298	A	G	0.3287	0.1011	6	101431739	MODIFIER	ARHGAP24	ENSOARG00020017927	Transcript	ENSOART00020027821.2	protein_coding	-	3/9	-	-	-	-	-	-	-	-	A	A/G	-	1	-	HGNC	HGNC:25361	-	-	-	-	-	-	-	-
OAR6_110419866.1	0.0228913	A	G	0.4298	A	G	0.3287	0.1011	6	101431739	MODIFIER	ARHGAP24	ENSOARG00020017927	Transcript	ENSOART00020027900.2	protein_coding	-	1/7	-	-	-	-	-	-	-	-	A	A/G	-	1	-	HGNC	HGNC:25361	-	-	-	-	-	-	-	-
OAR6_110419866.1	0.0228913	A	G	0.4298	A	G	0.3287	0.1011	6	101431739	MODIFIER	ARHGAP24	ENSOARG00020017927	Transcript	ENSOART00020061153.1	protein_coding	-	1/7	-	-	-	-	-	-	-	-	A	A/G	-	1	-	HGNC	HGNC:25361	-	-	-	-	-	-	-	-
Chr2:234770887	0.022955	A	G	0.4747	G	A	0.4225	0.1028	2	235668332	MODERATE	SPOCD1	ENSOARG00020006930	Transcript	ENSOART00020010729.2	protein_coding	7/13	-	-	-	2104	1850	617	Q/R	cAg/cGg	-	A	A/G	-	1	-	HGNC	HGNC:26338	-	-	-	-	-	-	-	-
Chr2:234770887	0.022955	A	G	0.4747	G	A	0.4225	0.1028	2	235668332	MODERATE	SPOCD1	ENSOARG00020006930	Transcript	ENSOART00020048346.1	protein_coding	8/14	-	-	-	1835	1667	556	Q/R	cAg/cGg	-	A	A/G	-	1	-	HGNC	HGNC:26338	-	-	-	-	-	-	-	-
Chr2:234770887	0.022955	A	G	0.4747	G	A	0.4225	0.1028	2	235668332	MODERATE	SPOCD1	ENSOARG00020006930	Transcript	ENSOART00020071027.1	protein_coding	10/16	-	-	-	2140	1886	629	Q/R	cAg/cGg	-	A	A/G	-	1	-	HGNC	HGNC:26338	-	-	-	-	-	-	-	-
Chr2:234770887	0.022955	A	G	0.4747	G	A	0.4225	0.1028	2	235668332	MODERATE	SPOCD1	ENSOARG00020006930	Transcript	ENSOART00020073434.1	protein_coding	9/15	-	-	-	1973	1844	615	Q/R	cAg/cGg	-	A	A/G	-	1	-	HGNC	HGNC:26338	-	-	-	-	-	-	-	-
oar3_OAR3_190509429	0.0229748	C	T	0.4114	C	T	0.3036	0.1078	3	191308523	MODIFIER	-	ENSOARG00020030797	Transcript	ENSOART00020049895.1	protein_coding	-	1/1	-	-	-	-	-	-	-	rs409897069	C	C/T	-	1	-	-	-	-	-	-	-	-	-	-	-
OAR3_104953636.1	0.0230185	A	C	0.3989	A	C	0.3007	0.0982	3	98758671	MODIFIER	-	ENSOARG00020033614	Transcript	ENSOART00020076625.1	lncRNA	-	1/2	-	-	-	-	-	-	-	-	A	A/C	-	-1	-	-	-	-	-	-	-	-	-	-	-
OAR3_104953636.1	0.0230185	A	C	0.3989	A	C	0.3007	0.0982	3	98758671	MODIFIER	-	ENSOARG00020033614	Transcript	ENSOART00020078477.1	lncRNA	-	2/2	-	-	-	-	-	-	-	-	A	A/C	-	-1	-	-	-	-	-	-	-	-	-	-	-
OAR3_96308555.1	0.0230424	G	A	0.3539	G	A	0.451	0.0971	3	90772307	MODIFIER	LTBP1	ENSOARG00020001760	Transcript	ENSOART00020003613.2	protein_coding	-	7/32	-	-	-	-	-	-	-	-	G	G/A	-	-1	-	HGNC	HGNC:6714	-	-	-	-	-	-	-	-
OAR3_96308555.1	0.0230424	G	A	0.3539	G	A	0.451	0.0971	3	90772307	MODIFIER	LTBP1	ENSOARG00020001760	Transcript	ENSOART00020003690.2	protein_coding	-	7/33	-	-	-	-	-	-	-	-	G	G/A	-	-1	-	HGNC	HGNC:6714	-	-	-	-	-	-	-	-
OAR3_96308555.1	0.0230424	G	A	0.3539	G	A	0.451	0.0971	3	90772307	MODIFIER	LTBP1	ENSOARG00020001760	Transcript	ENSOART00020003740.2	protein_coding	-	3/27	-	-	-	-	-	-	-	-	G	G/A	-	-1	-	HGNC	HGNC:6714	-	-	-	-	-	-	-	-
OAR3_96308555.1	0.0230424	G	A	0.3539	G	A	0.451	0.0971	3	90772307	MODIFIER	LTBP1	ENSOARG00020001760	Transcript	ENSOART00020003797.2	protein_coding	-	6/31	-	-	-	-	-	-	-	-	G	G/A	-	-1	-	HGNC	HGNC:6714	-	-	-	-	-	-	-	-
oar3_OAR2_248499665	0.0231174	A	G	0.4916	G	A	0.4056	0.1028	2	249343875	MODIFIER	NECAP2	ENSOARG00020015265	Transcript	ENSOART00020023483.2	protein_coding	-	-	-	-	-	-	-	-	-	rs417960056	A	A/G	755	-1	-	HGNC	HGNC:25528	-	-	-	-	-	-	-	-
oar3_OAR2_248499665	0.0231174	A	G	0.4916	G	A	0.4056	0.1028	2	249343875	MODIFIER	NECAP2	ENSOARG00020015265	Transcript	ENSOART00020023585.2	protein_coding	-	-	-	-	-	-	-	-	-	rs417960056	A	A/G	918	-1	-	HGNC	HGNC:25528	-	-	-	-	-	-	-	-
oar3_OAR2_248499665	0.0231174	A	G	0.4916	G	A	0.4056	0.1028	2	249343875	MODIFIER	NECAP2	ENSOARG00020015265	Transcript	ENSOART00020058816.1	protein_coding	-	-	-	-	-	-	-	-	-	rs417960056	A	A/G	891	-1	-	HGNC	HGNC:25528	-	-	-	-	-	-	-	-
oar3_OAR2_248499665	0.0231174	A	G	0.4916	G	A	0.4056	0.1028	2	249343875	MODIFIER	NECAP2	ENSOARG00020015265	Transcript	ENSOART00020058973.1	protein_coding	-	-	-	-	-	-	-	-	-	rs417960056	A	A/G	887	-1	-	HGNC	HGNC:25528	-	-	-	-	-	-	-	-
oar3_OAR2_248499665	0.0231174	A	G	0.4916	G	A	0.4056	0.1028	2	249343875	MODIFIER	NECAP2	ENSOARG00020015265	Transcript	ENSOART00020064633.1	protein_coding	-	-	-	-	-	-	-	-	-	rs417960056	A	A/G	890	-1	-	HGNC	HGNC:25528	-	-	-	-	-	-	-	-
OAR8_82938364.1	0.0231621	A	C	0.407	C	A	0.4854	0.1076	8	78008233	MODIFIER	-	-	-	-	-	-	-	-	-	-	-	-	-	-	-	A	A/C	-	-	-	-	-	-	-	-	-	-	-	-	-
oar3_OAR2_44329938	0.0232432	C	T	0.4579	C	T	0.3601	0.0978	2	44594889	MODIFIER	-	-	-	-	-	-	-	-	-	-	-	-	-	-	-	C	C/T	-	-	-	-	-	-	-	-	-	-	-	-	-
oar3_OAR6_57504975	0.0233262	T	C	0.2753	T	C	0.3811	0.1058	6	58249566	MODIFIER	-	-	-	-	-	-	-	-	-	-	-	-	-	-	rs428282434	T	T/C	-	-	-	-	-	-	-	-	-	-	-	-	-
oar3_OAR3_53630980	0.0233277	T	C	0.4494	C	T	0.4476	0.103	3	53792626	MODIFIER	-	-	-	-	-	-	-	-	-	-	-	-	-	-	rs424442745	T	T/C	-	-	-	-	-	-	-	-	-	-	-	-	-
s66483.1	0.0234506	A	G	0.3708	A	G	0.2727	0.0981	5	46698308	MODIFIER	-	-	-	-	-	-	-	-	-	-	-	-	-	-	rs428192116	A	A/G	-	-	-	-	-	-	-	-	-	-	-	-	-
oar3_OAR3_123558257	0.0234885	G	A	0.4045	A	G	0.493	0.1025	3	123652300	MODIFIER	-	-	-	-	-	-	-	-	-	-	-	-	-	-	rs420722459	G	G/A	-	-	-	-	-	-	-	-	-	-	-	-	-
s27609.1	0.0235229	C	T	0.2444	C	T	0.3462	0.1018	12	37967484	MODIFIER	-	ENSOARG00020010479	Transcript	ENSOART00020016097.2	protein_coding	-	1/9	-	-	-	-	-	-	-	-	C	C/T	-	1	-	-	-	-	-	-	-	-	-	-	-
oar3_OAR3_172526424	0.0235465	A	G	0.3624	A	G	0.2552	0.1072	3	173058829	MODIFIER	NT5DC3	ENSOARG00020012234	Transcript	ENSOART00020018792.2	protein_coding	14/14	-	-	-	3638	-	-	-	-	-	A	A/G	-	-1	-	HGNC	HGNC:30826	-	-	-	-	-	-	-	-
OAR9_8379972.1	0.0236155	G	A	0.4298	G	A	0.3217	0.1081	9	8315331	MODIFIER	-	-	-	-	-	-	-	-	-	-	-	-	-	-	-	G	G/A	-	-	-	-	-	-	-	-	-	-	-	-	-
s23658.1	0.0236526	C	A	0.3146	C	A	0.2133	0.1013	3	146037148	MODIFIER	-	-	-	-	-	-	-	-	-	-	-	-	-	-	rs402785032	C	C/A	-	-	-	-	-	-	-	-	-	-	-	-	-
OAR2_255166004.1	0.023924	G	A	0.1629	G	A	0.2762	0.1133	2	242220216	MODIFIER	NIPAL3	ENSOARG00020010878	Transcript	ENSOART00020016874.2	protein_coding	-	4/12	-	-	-	-	-	-	-	-	G	G/A	-	-1	-	HGNC	HGNC:25233	-	-	-	-	-	-	-	-
OAR2_255166004.1	0.023924	G	A	0.1629	G	A	0.2762	0.1133	2	242220216	MODIFIER	NIPAL3	ENSOARG00020010878	Transcript	ENSOART00020056313.1	protein_coding	-	4/10	-	-	-	-	-	-	-	-	G	G/A	-	-1	-	HGNC	HGNC:25233	-	-	-	-	-	-	-	-
OAR6_123166087.1	0.0240566	T	G	0.2697	T	G	0.3671	0.0974	6	109382399	MODIFIER	-	-	-	-	-	-	-	-	-	-	-	-	-	-	-	T	T/G	-	-	-	-	-	-	-	-	-	-	-	-	-
oar3_OAR2_121289017	0.0241273	T	C	0.4438	C	T	0.4545	0.1017	2	122422968	MODIFIER	-	-	-	-	-	-	-	-	-	-	-	-	-	-	-	T	T/C	-	-	-	-	-	-	-	-	-	-	-	-	-
OAR5_110288326.1	0.0242158	C	A	0.4579	C	A	0.3566	0.1013	5	101620967	MODIFIER	-	-	-	-	-	-	-	-	-	-	-	-	-	-	-	C	C/A	-	-	-	-	-	-	-	-	-	-	-	-	-
oar3_OAR1_239051241	0.0242683	A	C	0.4494	A	C	0.3252	0.1242	1	241738183	MODIFIER	-	-	-	-	-	-	-	-	-	-	-	-	-	-	-	A	A/C	-	-	-	-	-	-	-	-	-	-	-	-	-
oar3_OAR17_51753240	0.0244105	C	T	0.4831	C	T	0.3706	0.1125	17	52200762	MODIFIER	SNRNP35	ENSOARG00020006392	Transcript	ENSOART00020009876.2	protein_coding	-	1/2	-	-	-	-	-	-	-	-	C	C/T	-	-1	-	Uniprot_gn	-	-	-	-	-	-	-	-	-
oar3_OAR17_51753240	0.0244105	C	T	0.4831	C	T	0.3706	0.1125	17	52200762	MODIFIER	SNRNP35	ENSOARG00020006392	Transcript	ENSOART00020044063.1	protein_coding	-	1/1	-	-	-	-	-	-	-	-	C	C/T	-	-1	-	Uniprot_gn	-	-	-	-	-	-	-	-	-
OAR15_66701694.1	0.0246372	T	C	0.2893	T	C	0.1888	0.1005	15	61966483	MODIFIER	WT1	ENSOARG00020008054	Transcript	ENSOART00020013680.2	protein_coding	-	5/9	-	-	-	-	-	-	-	rs409945266	T	T/C	-	-1	-	HGNC	HGNC:12796	-	-	-	-	-	-	-	-
OAR15_66701694.1	0.0246372	T	C	0.2893	T	C	0.1888	0.1005	15	61966483	MODIFIER	WT1	ENSOARG00020008054	Transcript	ENSOART00020013741.2	protein_coding	-	4/8	-	-	-	-	-	-	-	rs409945266	T	T/C	-	-1	-	HGNC	HGNC:12796	-	-	-	-	-	-	-	-
OAR15_66701694.1	0.0246372	T	C	0.2893	T	C	0.1888	0.1005	15	61966483	MODIFIER	WT1	ENSOARG00020008054	Transcript	ENSOART00020013811.2	protein_coding	-	5/9	-	-	-	-	-	-	-	rs409945266	T	T/C	-	-1	-	HGNC	HGNC:12796	-	-	-	-	-	-	-	-
OAR15_61815950.1	0.0247884	C	T	0.4157	T	C	0.486	0.0983	15	57065133	MODIFIER	-	-	-	-	-	-	-	-	-	-	-	-	-	-	-	C	C/T	-	-	-	-	-	-	-	-	-	-	-	-	-
oar3_OAR12_54884150	0.0248415	T	C	0.4831	C	T	0.419	0.0979	12	56208698	MODIFIER	TNR	ENSOARG00020018083	Transcript	ENSOART00020027838.2	protein_coding	-	1/21	-	-	-	-	-	-	-	rs421742329	T	T/C	-	-1	-	HGNC	HGNC:11953	-	-	-	-	-	-	-	-
oar3_OAR12_54884150	0.0248415	T	C	0.4831	C	T	0.419	0.0979	12	56208698	MODIFIER	TNR	ENSOARG00020018083	Transcript	ENSOART00020080999.1	protein_coding	-	1/22	-	-	-	-	-	-	-	rs421742329	T	T/C	-	-1	-	HGNC	HGNC:11953	-	-	-	-	-	-	-	-
oar3_OAR23_10261704	0.0250371	A	G	0.3736	A	G	0.486	0.1124	23	10340445	MODIFIER	-	-	-	-	-	-	-	-	-	-	-	-	-	-	rs399448977	A	A/G	-	-	-	-	-	-	-	-	-	-	-	-	-
OAR2_226002221.1	0.0251701	A	G	0.3483	A	G	0.451	0.1027	2	214553156	MODIFIER	-	-	-	-	-	-	-	-	-	-	-	-	-	-	-	A	A/G	-	-	-	-	-	-	-	-	-	-	-	-	-
oar3_OAR3_38606423	0.0252385	G	A	0.4466	A	G	0.4545	0.0989	3	38740473	MODIFIER	AAK1	ENSOARG00020006215	Transcript	ENSOART00020009694.2	protein_coding	-	1/18	-	-	-	-	-	-	-	-	G	G/A	-	1	-	HGNC	HGNC:19679	-	-	-	-	-	-	-	-
oar3_OAR3_38606423	0.0252385	G	A	0.4466	A	G	0.4545	0.0989	3	38740473	MODIFIER	AAK1	ENSOARG00020006215	Transcript	ENSOART00020009734.2	protein_coding	-	1/19	-	-	-	-	-	-	-	-	G	G/A	-	1	-	HGNC	HGNC:19679	-	-	-	-	-	-	-	-
oar3_OAR3_38606423	0.0252385	G	A	0.4466	A	G	0.4545	0.0989	3	38740473	MODIFIER	AAK1	ENSOARG00020006215	Transcript	ENSOART00020009748.2	protein_coding	-	1/14	-	-	-	-	-	-	-	-	G	G/A	-	1	-	HGNC	HGNC:19679	-	-	-	-	-	-	-	-
oar3_OAR3_38606423	0.0252385	G	A	0.4466	A	G	0.4545	0.0989	3	38740473	MODIFIER	AAK1	ENSOARG00020006215	Transcript	ENSOART00020009761.2	protein_coding	-	1/16	-	-	-	-	-	-	-	-	G	G/A	-	1	-	HGNC	HGNC:19679	-	-	-	-	-	-	-	-
oar3_OAR3_38606423	0.0252385	G	A	0.4466	A	G	0.4545	0.0989	3	38740473	MODIFIER	AAK1	ENSOARG00020006215	Transcript	ENSOART00020009785.2	protein_coding	-	1/15	-	-	-	-	-	-	-	-	G	G/A	-	1	-	HGNC	HGNC:19679	-	-	-	-	-	-	-	-
oar3_OAR3_38606423	0.0252385	G	A	0.4466	A	G	0.4545	0.0989	3	38740473	MODIFIER	AAK1	ENSOARG00020006215	Transcript	ENSOART00020009835.2	protein_coding	-	1/20	-	-	-	-	-	-	-	-	G	G/A	-	1	-	HGNC	HGNC:19679	-	-	-	-	-	-	-	-
oar3_OAR3_38606423	0.0252385	G	A	0.4466	A	G	0.4545	0.0989	3	38740473	MODIFIER	AAK1	ENSOARG00020006215	Transcript	ENSOART00020009921.2	protein_coding	-	1/19	-	-	-	-	-	-	-	-	G	G/A	-	1	-	HGNC	HGNC:19679	-	-	-	-	-	-	-	-
s18168.1	0.0253567	A	G	0.4944	G	A	0.4091	0.0965	3	10020029	MODIFIER	-	-	-	-	-	-	-	-	-	-	-	-	-	-	-	A	A/G	-	-	-	-	-	-	-	-	-	-	-	-	-
OAR6_34158541.1	0.025432	G	A	0.4912	G	A	0.3796	0.1116	6	30959640	MODIFIER	HPGDS	ENSOARG00020020743	Transcript	ENSOART00020032033.2	protein_coding	-	4/5	-	-	-	-	-	-	-	-	G	G/A	-	1	-	HGNC	HGNC:17890	-	-	-	-	-	-	-	-
OAR6_34158541.1	0.025432	G	A	0.4912	G	A	0.3796	0.1116	6	30959640	MODIFIER	HPGDS	ENSOARG00020020743	Transcript	ENSOART00020063724.1	protein_coding	-	3/4	-	-	-	-	-	-	-	-	G	G/A	-	1	-	HGNC	HGNC:17890	-	-	-	-	-	-	-	-
s74050.1	0.0254977	G	A	0.429	A	G	0.4755	0.0955	5	393842	MODIFIER	-	-	-	-	-	-	-	-	-	-	-	-	-	-	-	G	G/A	-	-	-	-	-	-	-	-	-	-	-	-	-
OAR20_33384221.1	0.0255121	G	A	0.322	G	A	0.419	0.097	20	30468828	MODIFIER	ZNF322	ENSOARG00020027866	Transcript	ENSOART00020012829.2	protein_coding	-	-	-	-	-	-	-	-	-	rs407278747	G	G/A	3065	1	-	HGNC	HGNC:23640	-	-	-	-	-	-	-	-
OAR20_33384221.1	0.0255121	G	A	0.322	G	A	0.419	0.097	20	30468828	MODIFIER	ZNF322	ENSOARG00020027866	Transcript	ENSOART00020044946.1	protein_coding	3/3	-	-	-	5517	-	-	-	-	rs407278747	G	G/A	-	1	-	HGNC	HGNC:23640	-	-	-	-	-	-	-	-
OAR20_33384221.1	0.0255121	G	A	0.322	G	A	0.419	0.097	20	30468828	MODIFIER	ZNF322	ENSOARG00020027866	Transcript	ENSOART00020046416.1	protein_coding	4/4	-	-	-	5597	-	-	-	-	rs407278747	G	G/A	-	1	-	HGNC	HGNC:23640	-	-	-	-	-	-	-	-
OAR20_33384221.1	0.0255121	G	A	0.322	G	A	0.419	0.097	20	30468828	MODIFIER	ZNF322	ENSOARG00020027866	Transcript	ENSOART00020056828.1	protein_coding	-	-	-	-	-	-	-	-	-	rs407278747	G	G/A	566	1	-	HGNC	HGNC:23640	-	-	-	-	-	-	-	-
OAR20_33384221.1	0.0255121	G	A	0.322	G	A	0.419	0.097	20	30468828	MODIFIER	ZNF322	ENSOARG00020027866	Transcript	ENSOART00020061003.1	protein_coding	-	-	-	-	-	-	-	-	-	rs407278747	G	G/A	768	1	-	HGNC	HGNC:23640	-	-	-	-	-	-	-	-
OAR20_33384221.1	0.0255121	G	A	0.322	G	A	0.419	0.097	20	30468828	MODIFIER	ZNF322	ENSOARG00020027866	Transcript	ENSOART00020076916.1	protein_coding	-	-	-	-	-	-	-	-	-	rs407278747	G	G/A	728	1	-	HGNC	HGNC:23640	-	-	-	-	-	-	-	-
OAR20_33384221.1	0.0255121	G	A	0.322	G	A	0.419	0.097	20	30468828	MODIFIER	ZNF322	ENSOARG00020027866	Transcript	ENSOART00020077900.1	protein_coding	4/4	-	-	-	5566	-	-	-	-	rs407278747	G	G/A	-	1	-	HGNC	HGNC:23640	-	-	-	-	-	-	-	-
OAR1_33393829.1	0.0256677	A	G	0.4129	A	G	0.3042	0.1087	1	32916182	MODIFIER	-	-	-	-	-	-	-	-	-	-	-	-	-	-	-	A	A/G	-	-	-	-	-	-	-	-	-	-	-	-	-
OAR26_38437585.1	0.0256996	C	A	0.4017	C	A	0.3007	0.101	26	34587436	MODIFIER	-	-	-	-	-	-	-	-	-	-	-	-	-	-	-	C	C/A	-	-	-	-	-	-	-	-	-	-	-	-	-
s57682.1	0.0258474	A	G	0.4831	G	A	0.4196	0.0973	19	37598204	MODIFIER	ATXN7	ENSOARG00020024681	Transcript	ENSOART00020038675.2	protein_coding	-	12/12	-	-	-	-	-	-	-	-	A	A/G	-	-1	-	HGNC	HGNC:10560	-	-	-	-	-	-	-	-
s57682.1	0.0258474	A	G	0.4831	G	A	0.4196	0.0973	19	37598204	MODIFIER	ATXN7	ENSOARG00020024681	Transcript	ENSOART00020038683.2	protein_coding	11/11	-	-	-	2968	-	-	-	-	-	A	A/G	-	-1	-	HGNC	HGNC:10560	-	-	-	-	-	-	-	-
s57682.1	0.0258474	A	G	0.4831	G	A	0.4196	0.0973	19	37598204	MODIFIER	ATXN7	ENSOARG00020024681	Transcript	ENSOART00020038742.2	protein_coding	8/8	-	-	-	2560	-	-	-	-	-	A	A/G	-	-1	-	HGNC	HGNC:10560	-	-	-	-	-	-	-	-
OAR25_24815260.1	0.025856	A	G	0.4803	G	A	0.4196	0.1001	25	23158274	MODIFIER	CTNNA3	ENSOARG00020006501	Transcript	ENSOART00020010121.2	protein_coding	-	5/16	-	-	-	-	-	-	-	-	A	A/G	-	-1	-	HGNC	HGNC:2511	-	-	-	-	-	-	-	-
OAR25_24815260.1	0.025856	A	G	0.4803	G	A	0.4196	0.1001	25	23158274	MODIFIER	CTNNA3	ENSOARG00020006501	Transcript	ENSOART00020046752.1	protein_coding	-	6/17	-	-	-	-	-	-	-	-	A	A/G	-	-1	-	HGNC	HGNC:2511	-	-	-	-	-	-	-	-
OAR25_24815260.1	0.025856	A	G	0.4803	G	A	0.4196	0.1001	25	23158274	MODIFIER	CTNNA3	ENSOARG00020006501	Transcript	ENSOART00020059787.1	protein_coding	-	6/18	-	-	-	-	-	-	-	-	A	A/G	-	-1	-	HGNC	HGNC:2511	-	-	-	-	-	-	-	-
OAR25_24815260.1	0.025856	A	G	0.4803	G	A	0.4196	0.1001	25	23158274	MODIFIER	CTNNA3	ENSOARG00020006501	Transcript	ENSOART00020072088.1	protein_coding	-	5/17	-	-	-	-	-	-	-	-	A	A/G	-	-1	-	HGNC	HGNC:2511	-	-	-	-	-	-	-	-
OAR25_24815260.1	0.025856	A	G	0.4803	G	A	0.4196	0.1001	25	23158274	MODIFIER	CTNNA3	ENSOARG00020006501	Transcript	ENSOART00020072948.1	protein_coding	-	5/17	-	-	-	-	-	-	-	-	A	A/G	-	-1	-	HGNC	HGNC:2511	-	-	-	-	-	-	-	-
oar3_OAR2_197383148	0.025876	G	A	0.486	G	A	0.3776	0.1084	2	198446933	MODIFIER	-	-	-	-	-	-	-	-	-	-	-	-	-	-	-	G	G/A	-	-	-	-	-	-	-	-	-	-	-	-	-
OAR2_200376521.1	0.0260515	G	A	0.4185	A	G	0.4755	0.106	2	190001296	MODIFIER	CNTNAP5	ENSOARG00020006735	Transcript	ENSOART00020010529.2	protein_coding	-	4/23	-	-	-	-	-	-	-	-	G	G/A	-	1	-	HGNC	HGNC:18748	-	-	-	-	-	-	-	-
OAR15_73769949_X.1	0.0261366	C	A	0.2458	C	A	0.3462	0.1004	15	68845392	MODIFIER	-	-	-	-	-	-	-	-	-	-	-	-	-	-	-	C	C/A	-	-	-	-	-	-	-	-	-	-	-	-	-
oar3_OAR5_87715184	0.0264106	C	T	0.4073	T	C	0.4895	0.1032	5	88007955	MODERATE	ADGRV1	ENSOARG00020023738	Transcript	ENSOART00020036952.2	protein_coding	80/90	-	-	-	17609	17437	5813	L/F	Ctc/Ttc	-	C	C/T	-	1	-	HGNC	HGNC:17416	-	-	-	-	-	-	-	-
oar3_OAR5_87715184	0.0264106	C	T	0.4073	T	C	0.4895	0.1032	5	88007955	MODERATE	ADGRV1	ENSOARG00020023738	Transcript	ENSOART00020037048.2	protein_coding	7/15	-	-	-	2063	1903	635	L/F	Ctc/Ttc	-	C	C/T	-	1	-	HGNC	HGNC:17416	-	-	-	-	-	-	-	-
oar3_OAR12_43432458	0.0265467	G	T	0.2886	G	T	0.1923	0.0963	12	44671026	MODIFIER	-	-	-	-	-	-	-	-	-	-	-	-	-	-	-	G	G/T	-	-	-	-	-	-	-	-	-	-	-	-	-
oar3_OAR10_2614104	0.0266548	C	T	0.2584	C	T	0.3566	0.0982	10	2662926	MODIFIER	DIAPH3	ENSOARG00020003805	Transcript	ENSOART00020007092.2	protein_coding	-	7/26	-	-	-	-	-	-	-	-	C	C/T	-	1	-	HGNC	HGNC:15480	-	-	-	-	-	-	-	-
oar3_OAR10_2614104	0.0266548	C	T	0.2584	C	T	0.3566	0.0982	10	2662926	MODIFIER	DIAPH3	ENSOARG00020003805	Transcript	ENSOART00020007140.2	protein_coding	-	6/25	-	-	-	-	-	-	-	-	C	C/T	-	1	-	HGNC	HGNC:15480	-	-	-	-	-	-	-	-
oar3_OAR10_2614104	0.0266548	C	T	0.2584	C	T	0.3566	0.0982	10	2662926	MODIFIER	DIAPH3	ENSOARG00020003805	Transcript	ENSOART00020007222.2	protein_coding	-	8/27	-	-	-	-	-	-	-	-	C	C/T	-	1	-	HGNC	HGNC:15480	-	-	-	-	-	-	-	-
oar3_OAR10_2614104	0.0266548	C	T	0.2584	C	T	0.3566	0.0982	10	2662926	MODIFIER	DIAPH3	ENSOARG00020003805	Transcript	ENSOART00020007258.2	protein_coding	-	6/25	-	-	-	-	-	-	-	-	C	C/T	-	1	-	HGNC	HGNC:15480	-	-	-	-	-	-	-	-
s20397.1	0.0272254	C	T	0.4972	C	T	0.3986	0.0986	5	74666267	MODIFIER	-	-	-	-	-	-	-	-	-	-	-	-	-	-	-	C	C/T	-	-	-	-	-	-	-	-	-	-	-	-	-
OAR20_26273474.1	0.0273746	T	C	0.2781	T	C	0.3811	0.103	20	24656458	MODIFIER	-	-	-	-	-	-	-	-	-	-	-	-	-	-	rs400416200	T	T/C	-	-	-	-	-	-	-	-	-	-	-	-	-
Chr18:60499590	0.0274601	G	A	0.3371	G	A	0.451	0.1139	18	59515859	MODIFIER	-	-	-	-	-	-	-	-	-	-	-	-	-	-	rs408403353	G	G/A	-	-	-	-	-	-	-	-	-	-	-	-	-
OAR7_79266093.1	0.0278276	G	A	0.4579	A	G	0.4406	0.1015	7	73563688	MODIFIER	RHOJ	ENSOARG00020012405	Transcript	ENSOART00020018912.2	protein_coding	-	1/4	-	-	-	-	-	-	-	rs427430203	G	G/A	-	1	-	Uniprot_gn	-	-	-	-	-	-	-	-	-
OAR8_39847976.1	0.0278509	C	T	0.4551	T	C	0.4406	0.1043	8	37267233	MODIFIER	-	-	-	-	-	-	-	-	-	-	-	-	-	-	-	C	C/T	-	-	-	-	-	-	-	-	-	-	-	-	-
s31207.1	0.027852	C	T	0.4797	T	C	0.4094	0.1109	19	54405918	MODIFIER	ATP2B2	ENSOARG00020025546	Transcript	ENSOART00020040092.2	protein_coding	-	4/22	-	-	-	-	-	-	-	rs411068835	C	C/T	-	-1	-	HGNC	HGNC:815	-	-	-	-	-	-	-	-
s31207.1	0.027852	C	T	0.4797	T	C	0.4094	0.1109	19	54405918	MODIFIER	ATP2B2	ENSOARG00020025546	Transcript	ENSOART00020040113.2	protein_coding	-	4/21	-	-	-	-	-	-	-	rs411068835	C	C/T	-	-1	-	HGNC	HGNC:815	-	-	-	-	-	-	-	-
s31207.1	0.027852	C	T	0.4797	T	C	0.4094	0.1109	19	54405918	MODIFIER	ATP2B2	ENSOARG00020025546	Transcript	ENSOART00020040130.2	protein_coding	-	4/19	-	-	-	-	-	-	-	rs411068835	C	C/T	-	-1	-	HGNC	HGNC:815	-	-	-	-	-	-	-	-
s31207.1	0.027852	C	T	0.4797	T	C	0.4094	0.1109	19	54405918	MODIFIER	ATP2B2	ENSOARG00020025546	Transcript	ENSOART00020040138.2	protein_coding	-	4/18	-	-	-	-	-	-	-	rs411068835	C	C/T	-	-1	-	HGNC	HGNC:815	-	-	-	-	-	-	-	-
s31207.1	0.027852	C	T	0.4797	T	C	0.4094	0.1109	19	54405918	MODIFIER	ATP2B2	ENSOARG00020025546	Transcript	ENSOART00020040142.2	protein_coding	-	4/19	-	-	-	-	-	-	-	rs411068835	C	C/T	-	-1	-	HGNC	HGNC:815	-	-	-	-	-	-	-	-
s31207.1	0.027852	C	T	0.4797	T	C	0.4094	0.1109	19	54405918	MODIFIER	ATP2B2	ENSOARG00020025546	Transcript	ENSOART00020040145.2	protein_coding	-	5/20	-	-	-	-	-	-	-	rs411068835	C	C/T	-	-1	-	HGNC	HGNC:815	-	-	-	-	-	-	-	-
s31207.1	0.027852	C	T	0.4797	T	C	0.4094	0.1109	19	54405918	MODIFIER	MIR885	ENSOARG00020025598	Transcript	ENSOART00020040148.2	miRNA	-	-	-	-	-	-	-	-	-	rs411068835	C	C/T	1790	-1	-	HGNC	HGNC:33659	-	-	-	-	-	-	-	-
oar3_OAR3_142343151	0.0278745	A	G	0.4382	G	A	0.465	0.0968	3	142568455	MODIFIER	TMEM117	ENSOARG00020005245	Transcript	ENSOART00020008094.2	protein_coding	-	4/7	-	-	-	-	-	-	-	rs405477833	A	A/G	-	-1	-	Uniprot_gn	-	-	-	-	-	-	-	-	-
oar3_OAR3_142343151	0.0278745	A	G	0.4382	G	A	0.465	0.0968	3	142568455	MODIFIER	TMEM117	ENSOARG00020005245	Transcript	ENSOART00020008120.2	protein_coding	-	4/6	-	-	-	-	-	-	-	rs405477833	A	A/G	-	-1	-	Uniprot_gn	-	-	-	-	-	-	-	-	-
s31524.1	0.0279617	C	T	0.4213	C	T	0.3217	0.0996	24	20930893	MODIFIER	-	-	-	-	-	-	-	-	-	-	-	-	-	-	rs425644227	C	C/T	-	-	-	-	-	-	-	-	-	-	-	-	-
oar3_OAR23_40439953	0.0280347	T	G	0.2816	T	G	0.1861	0.0955	23	40585909	MODIFIER	-	-	-	-	-	-	-	-	-	-	-	-	-	-	rs418744327	T	T/G	-	-	-	-	-	-	-	-	-	-	-	-	-
oar3_OAR16_9358222	0.0280952	G	A	0.3174	G	A	0.2168	0.1006	16	9492303	MODIFIER	MRPS27	ENSOARG00020023220	Transcript	ENSOART00020036138.2	protein_coding	-	7/13	-	-	-	-	-	-	-	-	G	G/A	-	1	-	HGNC	HGNC:14512	-	-	-	-	-	-	-	-
oar3_OAR16_9358222	0.0280952	G	A	0.3174	G	A	0.2168	0.1006	16	9492303	MODIFIER	MRPS27	ENSOARG00020023220	Transcript	ENSOART00020043170.1	protein_coding	-	5/13	-	-	-	-	-	-	-	-	G	G/A	-	1	-	HGNC	HGNC:14512	-	-	-	-	-	-	-	-
oar3_OAR16_9358222	0.0280952	G	A	0.3174	G	A	0.2168	0.1006	16	9492303	MODIFIER	MRPS27	ENSOARG00020023220	Transcript	ENSOART00020053548.1	protein_coding	-	5/11	-	-	-	-	-	-	-	-	G	G/A	-	1	-	HGNC	HGNC:14512	-	-	-	-	-	-	-	-
oar3_OAR16_9358222	0.0280952	G	A	0.3174	G	A	0.2168	0.1006	16	9492303	MODIFIER	MRPS27	ENSOARG00020023220	Transcript	ENSOART00020058073.1	protein_coding	-	4/10	-	-	-	-	-	-	-	-	G	G/A	-	1	-	HGNC	HGNC:14512	-	-	-	-	-	-	-	-
oar3_OAR16_9358222	0.0280952	G	A	0.3174	G	A	0.2168	0.1006	16	9492303	MODIFIER	MRPS27	ENSOARG00020023220	Transcript	ENSOART00020074237.1	protein_coding	-	4/10	-	-	-	-	-	-	-	-	G	G/A	-	1	-	HGNC	HGNC:14512	-	-	-	-	-	-	-	-
LD_OZ_OAR22_3499143.1	0.0282932	T	C	0.4635	C	T	0.4196	0.1169	22	2657209	MODIFIER	-	ENSOARG00020040680	Transcript	ENSOART00020048703.1	lncRNA	-	2/2	-	-	-	-	-	-	-	rs415787405	T	T/C	-	1	-	-	-	-	-	-	-	-	-	-	-
oar3_OAR22_2651106	0.0282932	C	T	0.4635	T	C	0.4196	0.1169	22	2662013	MODIFIER	-	ENSOARG00020040680	Transcript	ENSOART00020048703.1	lncRNA	-	2/2	-	-	-	-	-	-	-	rs426404348	C	C/T	-	1	-	-	-	-	-	-	-	-	-	-	-
OAR2_237163960.1	0.0283126	T	C	0.4441	C	T	0.4504	0.1055	2	225444120	MODIFIER	-	-	-	-	-	-	-	-	-	-	-	-	-	-	rs411538972	T	T/C	-	-	-	-	-	-	-	-	-	-	-	-	-
oar3_OAR3_154754392	0.0284839	G	A	0.3202	G	A	0.2238	0.0964	3	155041149	MODIFIER	-	-	-	-	-	-	-	-	-	-	-	-	-	-	rs416063055	G	G/A	-	-	-	-	-	-	-	-	-	-	-	-	-
s37537.1	0.0284903	C	A	0.4775	A	C	0.4161	0.1064	25	41902925	MODIFIER	ARHGAP22	ENSOARG00020026437	Transcript	ENSOART00020041596.2	protein_coding	-	5/11	-	-	-	-	-	-	-	-	C	C/A	-	-1	-	HGNC	HGNC:30320	-	-	-	-	-	-	-	-
s37537.1	0.0284903	C	A	0.4775	A	C	0.4161	0.1064	25	41902925	MODIFIER	ARHGAP22	ENSOARG00020026437	Transcript	ENSOART00020041598.2	protein_coding	-	3/9	-	-	-	-	-	-	-	-	C	C/A	-	-1	-	HGNC	HGNC:30320	-	-	-	-	-	-	-	-
s37537.1	0.0284903	C	A	0.4775	A	C	0.4161	0.1064	25	41902925	MODIFIER	ARHGAP22	ENSOARG00020026437	Transcript	ENSOART00020058382.1	protein_coding	-	1/7	-	-	-	-	-	-	-	-	C	C/A	-	-1	-	HGNC	HGNC:30320	-	-	-	-	-	-	-	-
s37537.1	0.0284903	C	A	0.4775	A	C	0.4161	0.1064	25	41902925	MODIFIER	ARHGAP22	ENSOARG00020026437	Transcript	ENSOART00020067121.1	protein_coding	-	3/5	-	-	-	-	-	-	-	-	C	C/A	-	-1	-	HGNC	HGNC:30320	-	-	-	-	-	-	-	-
OAR3_205245728.1	0.0285886	A	G	0.4579	G	A	0.4301	0.112	3	191436070	MODIFIER	-	ENSOARG00020030797	Transcript	ENSOART00020049895.1	protein_coding	-	1/1	-	-	-	-	-	-	-	-	A	A/G	-	1	-	-	-	-	-	-	-	-	-	-	-
OAR5_86551989.1	0.0287672	C	A	0.427	A	C	0.4406	0.1324	5	79016470	MODIFIER	SSBP2	ENSOARG00020017360	Transcript	ENSOART00020031439.2	protein_coding	-	9/17	-	-	-	-	-	-	-	-	C	C/A	-	-1	-	HGNC	HGNC:15831	-	-	-	-	-	-	-	-
OAR5_86551989.1	0.0287672	C	A	0.427	A	C	0.4406	0.1324	5	79016470	MODIFIER	SSBP2	ENSOARG00020017360	Transcript	ENSOART00020031500.2	protein_coding	-	7/15	-	-	-	-	-	-	-	-	C	C/A	-	-1	-	HGNC	HGNC:15831	-	-	-	-	-	-	-	-
OAR5_86551989.1	0.0287672	C	A	0.427	A	C	0.4406	0.1324	5	79016470	MODIFIER	SSBP2	ENSOARG00020017360	Transcript	ENSOART00020031601.2	protein_coding	-	7/7	-	-	-	-	-	-	-	-	C	C/A	-	-1	-	HGNC	HGNC:15831	-	-	-	-	-	-	-	-
OAR5_86551989.1	0.0287672	C	A	0.427	A	C	0.4406	0.1324	5	79016470	MODIFIER	SSBP2	ENSOARG00020017360	Transcript	ENSOART00020031727.2	protein_coding	-	8/16	-	-	-	-	-	-	-	-	C	C/A	-	-1	-	HGNC	HGNC:15831	-	-	-	-	-	-	-	-
OAR5_86551989.1	0.0287672	C	A	0.427	A	C	0.4406	0.1324	5	79016470	MODIFIER	SSBP2	ENSOARG00020017360	Transcript	ENSOART00020031735.2	protein_coding	-	8/15	-	-	-	-	-	-	-	-	C	C/A	-	-1	-	HGNC	HGNC:15831	-	-	-	-	-	-	-	-
OAR5_86551989.1	0.0287672	C	A	0.427	A	C	0.4406	0.1324	5	79016470	MODIFIER	SSBP2	ENSOARG00020017360	Transcript	ENSOART00020031793.2	protein_coding	-	8/14	-	-	-	-	-	-	-	-	C	C/A	-	-1	-	HGNC	HGNC:15831	-	-	-	-	-	-	-	-
s59502.1	0.0287679	T	C	0.5	T	C	0.4021	0.0979	2	77913089	MODIFIER	-	-	-	-	-	-	-	-	-	-	-	-	-	-	rs427007694	T	T/C	-	-	-	-	-	-	-	-	-	-	-	-	-
oar3_OAR17_775966	0.0288826	T	C	0.3933	T	C	0.2821	0.1112	17	1116536	MODIFIER	-	-	-	-	-	-	-	-	-	-	-	-	-	-	rs402401895	T	T/C	-	-	-	-	-	-	-	-	-	-	-	-	-
oar3_OAR7_503008	0.0292989	G	A	0.4045	G	A	0.2832	0.1213	7	721641	MODIFIER	MCC	ENSOARG00020013148	Transcript	ENSOART00020020876.2	protein_coding	-	2/18	-	-	-	-	-	-	-	-	G	G/A	-	1	-	HGNC	HGNC:6935	-	-	-	-	-	-	-	-
oar3_OAR7_503008	0.0292989	G	A	0.4045	G	A	0.2832	0.1213	7	721641	MODIFIER	MCC	ENSOARG00020013148	Transcript	ENSOART00020021194.2	protein_coding	-	1/15	-	-	-	-	-	-	-	-	G	G/A	-	1	-	HGNC	HGNC:6935	-	-	-	-	-	-	-	-
oar3_OAR7_503008	0.0292989	G	A	0.4045	G	A	0.2832	0.1213	7	721641	MODIFIER	MCC	ENSOARG00020013148	Transcript	ENSOART00020021378.2	protein_coding	-	1/17	-	-	-	-	-	-	-	-	G	G/A	-	1	-	HGNC	HGNC:6935	-	-	-	-	-	-	-	-
oar3_OAR7_503008	0.0292989	G	A	0.4045	G	A	0.2832	0.1213	7	721641	MODIFIER	MCC	ENSOARG00020013148	Transcript	ENSOART00020021551.2	protein_coding	-	1/17	-	-	-	-	-	-	-	-	G	G/A	-	1	-	HGNC	HGNC:6935	-	-	-	-	-	-	-	-
oar3_OAR7_503008	0.0292989	G	A	0.4045	G	A	0.2832	0.1213	7	721641	MODIFIER	MCC	ENSOARG00020013148	Transcript	ENSOART00020022038.2	protein_coding	-	1/17	-	-	-	-	-	-	-	-	G	G/A	-	1	-	HGNC	HGNC:6935	-	-	-	-	-	-	-	-
OAR14_4168859.1	0.0294245	T	C	0.2978	T	C	0.4091	0.1113	14	4339478	MODIFIER	-	ENSOARG00020040697	Transcript	ENSOART00020049293.1	lncRNA	-	1/1	-	-	-	-	-	-	-	-	T	T/C	-	-1	-	-	-	-	-	-	-	-	-	-	-
OAR14_4168859.1	0.0294245	T	C	0.2978	T	C	0.4091	0.1113	14	4339478	MODIFIER	-	ENSOARG00020040697	Transcript	ENSOART00020060249.1	lncRNA	-	2/2	-	-	-	-	-	-	-	-	T	T/C	-	-1	-	-	-	-	-	-	-	-	-	-	-
oar3_OAR1_86199419	0.0294601	C	T	0.4663	C	T	0.3531	0.1132	1	87052345	MODIFIER	-	ENSOARG00020007931	Transcript	ENSOART00020011970.2	protein_coding	-	-	-	-	-	-	-	-	-	-	C	C/T	4862	1	-	-	-	-	-	-	-	-	-	-	-
oar3_OAR1_86199419	0.0294601	C	T	0.4663	C	T	0.3531	0.1132	1	87052345	MODIFIER	-	ENSOARG00020007854	Transcript	ENSOART00020012030.2	protein_coding	-	-	-	-	-	-	-	-	-	-	C	C/T	105	1	-	-	-	-	-	-	-	-	-	-	-
OAR20_33633260.1	0.0294645	G	A	0.4522	A	G	0.451	0.0968	20	30700282	MODIFIER	-	ENSOARG00020028240	Transcript	ENSOART00020078637.1	protein_coding	-	1/1	-	-	-	-	-	-	-	rs419667405	G	G/A	-	1	-	-	-	-	-	-	-	-	-	-	-
OAR6_117260346.1	0.0295055	G	A	0.5	G	A	0.3951	0.1049	6	117033465	MODIFIER	ZFYVE28	ENSOARG00020022674	Transcript	ENSOART00020035220.2	protein_coding	-	1/3	-	-	-	-	-	-	-	rs424996563	G	G/A	-	1	-	HGNC	HGNC:29334	-	-	-	-	-	-	-	-
OAR6_117260346.1	0.0295055	G	A	0.5	G	A	0.3951	0.1049	6	117033465	MODIFIER	ZFYVE28	ENSOARG00020022674	Transcript	ENSOART00020059274.1	protein_coding	-	1/12	-	-	-	-	-	-	-	rs424996563	G	G/A	-	1	-	HGNC	HGNC:29334	-	-	-	-	-	-	-	-
oar3_OAR3_191168773	0.0295781	T	C	0.3624	T	C	0.2587	0.1037	3	191968603	MODIFIER	SOX5	ENSOARG00020004965	Transcript	ENSOART00020007771.2	protein_coding	-	6/14	-	-	-	-	-	-	-	rs427403237	T	T/C	-	1	-	HGNC	HGNC:11201	-	-	-	-	-	-	-	-
oar3_OAR3_191168773	0.0295781	T	C	0.3624	T	C	0.2587	0.1037	3	191968603	MODIFIER	SOX5	ENSOARG00020004965	Transcript	ENSOART00020007862.2	protein_coding	-	8/16	-	-	-	-	-	-	-	rs427403237	T	T/C	-	1	-	HGNC	HGNC:11201	-	-	-	-	-	-	-	-
oar3_OAR3_191168773	0.0295781	T	C	0.3624	T	C	0.2587	0.1037	3	191968603	MODIFIER	SOX5	ENSOARG00020004965	Transcript	ENSOART00020007982.2	protein_coding	-	5/13	-	-	-	-	-	-	-	rs427403237	T	T/C	-	1	-	HGNC	HGNC:11201	-	-	-	-	-	-	-	-
oar3_OAR3_191168773	0.0295781	T	C	0.3624	T	C	0.2587	0.1037	3	191968603	MODIFIER	SOX5	ENSOARG00020004965	Transcript	ENSOART00020008014.2	protein_coding	-	7/15	-	-	-	-	-	-	-	rs427403237	T	T/C	-	1	-	HGNC	HGNC:11201	-	-	-	-	-	-	-	-
oar3_OAR3_191168773	0.0295781	T	C	0.3624	T	C	0.2587	0.1037	3	191968603	MODIFIER	SOX5	ENSOARG00020004965	Transcript	ENSOART00020056277.1	protein_coding	-	6/14	-	-	-	-	-	-	-	rs427403237	T	T/C	-	1	-	HGNC	HGNC:11201	-	-	-	-	-	-	-	-
oar3_OAR3_191168773	0.0295781	T	C	0.3624	T	C	0.2587	0.1037	3	191968603	MODIFIER	SOX5	ENSOARG00020004965	Transcript	ENSOART00020066989.1	protein_coding	-	5/11	-	-	-	-	-	-	-	rs427403237	T	T/C	-	1	-	HGNC	HGNC:11201	-	-	-	-	-	-	-	-
OAR6_35262153.1	0.0297932	T	C	0.4213	T	C	0.3042	0.1171	6	31878668	MODIFIER	GRID2	ENSOARG00020021077	Transcript	ENSOART00020033391.2	protein_coding	-	8/15	-	-	-	-	-	-	-	-	T	T/C	-	-1	-	HGNC	HGNC:4576	-	-	-	-	-	-	-	-
OAR6_35262153.1	0.0297932	T	C	0.4213	T	C	0.3042	0.1171	6	31878668	MODIFIER	GRID2	ENSOARG00020021077	Transcript	ENSOART00020033656.2	protein_coding	-	8/15	-	-	-	-	-	-	-	-	T	T/C	-	-1	-	HGNC	HGNC:4576	-	-	-	-	-	-	-	-
OAR6_35262153.1	0.0297932	T	C	0.4213	T	C	0.3042	0.1171	6	31878668	MODIFIER	GRID2	ENSOARG00020021077	Transcript	ENSOART00020033681.2	protein_coding	-	7/14	-	-	-	-	-	-	-	-	T	T/C	-	-1	-	HGNC	HGNC:4576	-	-	-	-	-	-	-	-
s21684.1	0.0299141	C	T	0.3567	C	T	0.2587	0.098	3	220611598	MODIFIER	SAMM50	ENSOARG00020001328	Transcript	ENSOART00020001995.2	protein_coding	-	-	-	-	-	-	-	-	-	rs427715206	C	C/T	2486	1	-	Uniprot_gn	-	-	-	-	-	-	-	-	-
s21684.1	0.0299141	C	T	0.3567	C	T	0.2587	0.098	3	220611598	MODIFIER	SAMM50	ENSOARG00020001328	Transcript	ENSOART00020047199.1	protein_coding	-	-	-	-	-	-	-	-	-	rs427715206	C	C/T	2511	1	-	Uniprot_gn	-	-	-	-	-	-	-	-	-
s13855.1	0.0301165	G	A	0.3904	G	A	0.2867	0.1037	5	92830676	MODIFIER	-	-	-	-	-	-	-	-	-	-	-	-	-	-	-	G	G/A	-	-	-	-	-	-	-	-	-	-	-	-	-
oar3_OAR15_21983181	0.0301324	T	C	0.4888	C	T	0.4056	0.1056	15	22235493	MODERATE	BCO2	ENSOARG00020019443	Transcript	ENSOART00020030052.2	protein_coding	3/12	-	-	-	556	478	160	C/R	Tgt/Cgt	rs119102832	T	T/C	-	1	-	Uniprot_gn	-	-	-	-	-	tolerated(1)	-	-	-
oar3_OAR15_21983181	0.0301324	T	C	0.4888	C	T	0.4056	0.1056	15	22235493	MODERATE	BCO2	ENSOARG00020019443	Transcript	ENSOART00020049704.1	protein_coding	3/11	-	-	-	556	478	160	C/R	Tgt/Cgt	rs119102832	T	T/C	-	1	-	Uniprot_gn	-	-	-	-	-	tolerated(1)	-	-	-
oar3_OAR14_1076129	0.030259	G	A	0.3636	G	A	0.2643	0.0993	14	1185503	MODIFIER	-	ENSOARG00020030610	Transcript	ENSOART00020049580.1	lncRNA	-	-	-	-	-	-	-	-	-	-	G	G/A	3654	-1	-	-	-	-	-	-	-	-	-	-	-
oar3_OAR14_1076129	0.030259	G	A	0.3636	G	A	0.2643	0.0993	14	1185503	MODIFIER	-	ENSOARG00020035356	Transcript	ENSOART00020065729.1	lncRNA	-	1/1	-	-	-	-	-	-	-	-	G	G/A	-	1	-	-	-	-	-	-	-	-	-	-	-
oar3_OAR14_1076129	0.030259	G	A	0.3636	G	A	0.2643	0.0993	14	1185503	MODIFIER	-	ENSOARG00020030610	Transcript	ENSOART00020066823.1	lncRNA	-	-	-	-	-	-	-	-	-	-	G	G/A	3662	-1	-	-	-	-	-	-	-	-	-	-	-
oar3_OAR14_1076129	0.030259	G	A	0.3636	G	A	0.2643	0.0993	14	1185503	MODIFIER	-	ENSOARG00020028079	Transcript	ENSOART00020079077.1	lncRNA	-	1/1	-	-	-	-	-	-	-	-	G	G/A	-	1	-	-	-	-	-	-	-	-	-	-	-
oar3_OAR14_1076129	0.030259	G	A	0.3636	G	A	0.2643	0.0993	14	1185503	MODIFIER	-	ENSOARG00020035059	Transcript	ENSOART00020080831.1	lncRNA	-	-	-	-	-	-	-	-	-	-	G	G/A	3094	-1	-	-	-	-	-	-	-	-	-	-	-
OAR13_26553208.1	0.0305026	C	T	0.2528	C	T	0.1538	0.099	13	24343101	MODIFIER	KIAA1217	ENSOARG00020024750	Transcript	ENSOART00020038774.2	protein_coding	-	1/19	-	-	-	-	-	-	-	-	C	C/T	-	1	-	HGNC	HGNC:25428	-	-	-	-	-	-	-	-
OAR13_26553208.1	0.0305026	C	T	0.2528	C	T	0.1538	0.099	13	24343101	MODIFIER	KIAA1217	ENSOARG00020024750	Transcript	ENSOART00020039057.2	protein_coding	-	1/17	-	-	-	-	-	-	-	-	C	C/T	-	1	-	HGNC	HGNC:25428	-	-	-	-	-	-	-	-
OAR3_95014619.1	0.0308625	A	G	0.3757	A	G	0.479	0.1033	3	89675123	MODIFIER	-	-	-	-	-	-	-	-	-	-	-	-	-	-	rs405377436	A	A/G	-	-	-	-	-	-	-	-	-	-	-	-	-
OAR20_44353209.1	0.0311201	C	T	0.3596	C	T	0.458	0.0984	20	40968281	MODIFIER	-	-	-	-	-	-	-	-	-	-	-	-	-	-	rs425167343	C	C/T	-	-	-	-	-	-	-	-	-	-	-	-	-
OAR15_15850746.1	0.031202	A	G	0.4775	A	G	0.3811	0.0964	15	15853284	MODIFIER	CWF19L2	ENSOARG00020024318	Transcript	ENSOART00020037999.2	protein_coding	-	17/17	-	-	-	-	-	-	-	rs424141402	A	A/G	-	1	-	HGNC	HGNC:26508	-	-	-	-	-	-	-	-
OAR15_15850746.1	0.031202	A	G	0.4775	A	G	0.3811	0.0964	15	15853284	MODIFIER	CWF19L2	ENSOARG00020024318	Transcript	ENSOART00020038062.2	protein_coding	-	16/16	-	-	-	-	-	-	-	rs424141402	A	A/G	-	1	-	HGNC	HGNC:26508	-	-	-	-	-	-	-	-
OAR15_15850746.1	0.031202	A	G	0.4775	A	G	0.3811	0.0964	15	15853284	MODIFIER	CWF19L2	ENSOARG00020024318	Transcript	ENSOART00020038117.2	protein_coding	-	16/16	-	-	-	-	-	-	-	rs424141402	A	A/G	-	1	-	HGNC	HGNC:26508	-	-	-	-	-	-	-	-
oar3_OAR24_9373697	0.0312063	T	C	0.4944	T	C	0.3986	0.0958	24	9905252	MODIFIER	TEKT5	ENSOARG00020015201	Transcript	ENSOART00020023246.2	protein_coding	-	5/6	-	-	-	-	-	-	-	rs427923635	T	T/C	-	-1	-	Uniprot_gn	-	-	-	-	-	-	-	-	-
oar3_OAR18_12208388	0.0312619	C	T	0.4607	C	T	0.3531	0.1076	18	12463101	MODIFIER	-	ENSOARG00020033281	Transcript	ENSOART00020076641.1	protein_coding	-	2/2	-	-	-	-	-	-	-	rs424986153	C	C/T	-	-1	-	-	-	-	-	-	-	-	-	-	-
oar3_OAR2_241429666	0.0314742	A	C	0.3904	A	C	0.2867	0.1037	2	242280534	MODIFIER	-	ENSOARG00020026539	Transcript	ENSOART00020069961.1	protein_coding	-	1/1	-	-	-	-	-	-	-	-	A	A/C	-	-1	-	-	-	-	-	-	-	-	-	-	-
oar3_OAR2_241429666	0.0314742	A	C	0.3904	A	C	0.2867	0.1037	2	242280534	MODIFIER	STPG1	ENSOARG00020011141	Transcript	ENSOART00020017207.2	protein_coding	-	5/9	-	-	-	-	-	-	-	-	A	A/C	-	1	-	Uniprot_gn	-	-	-	-	-	-	-	-	-
oar3_OAR2_241429666	0.0314742	A	C	0.3904	A	C	0.2867	0.1037	2	242280534	MODIFIER	STPG1	ENSOARG00020011141	Transcript	ENSOART00020017233.2	protein_coding	-	3/7	-	-	-	-	-	-	-	-	A	A/C	-	1	-	Uniprot_gn	-	-	-	-	-	-	-	-	-
oar3_OAR2_241429666	0.0314742	A	C	0.3904	A	C	0.2867	0.1037	2	242280534	MODIFIER	STPG1	ENSOARG00020011141	Transcript	ENSOART00020060677.1	protein_coding	-	3/6	-	-	-	-	-	-	-	-	A	A/C	-	1	-	Uniprot_gn	-	-	-	-	-	-	-	-	-
oar3_OAR2_241429666	0.0314742	A	C	0.3904	A	C	0.2867	0.1037	2	242280534	MODIFIER	STPG1	ENSOARG00020011141	Transcript	ENSOART00020078461.1	protein_coding	-	5/9	-	-	-	-	-	-	-	-	A	A/C	-	1	-	Uniprot_gn	-	-	-	-	-	-	-	-	-
OAR24_22279571.1	0.0316012	G	A	0.4579	A	G	0.4231	0.119	24	21038041	MODIFIER	HS3ST2	ENSOARG00020024500	Transcript	ENSOART00020038333.2	protein_coding	-	1/1	-	-	-	-	-	-	-	-	G	G/A	-	1	-	HGNC	HGNC:5195	-	-	-	-	-	-	-	-
oar3_OAR24_20514136	0.0316012	A	G	0.4579	G	A	0.4231	0.119	24	21038785	MODIFIER	HS3ST2	ENSOARG00020024500	Transcript	ENSOART00020038333.2	protein_coding	-	1/1	-	-	-	-	-	-	-	-	A	A/G	-	1	-	HGNC	HGNC:5195	-	-	-	-	-	-	-	-
OAR5_111467301.1	0.0317233	G	T	0.3652	G	T	0.2587	0.1065	5	102711226	MODIFIER	-	-	-	-	-	-	-	-	-	-	-	-	-	-	rs402534002	G	G/T	-	-	-	-	-	-	-	-	-	-	-	-	-
OAR4_62748691.1	0.0317425	T	C	0.2697	T	C	0.1678	0.1019	4	60988715	MODIFIER	-	-	-	-	-	-	-	-	-	-	-	-	-	-	rs407194474	T	T/C	-	-	-	-	-	-	-	-	-	-	-	-	-
s52397.1	0.0322096	C	T	0.4719	C	T	0.3741	0.0978	2	249387728	MODIFIER	SPATA21	ENSOARG00020015458	Transcript	ENSOART00020023832.2	protein_coding	-	6/10	-	-	-	-	-	-	-	rs412980575	C	C/T	-	1	-	HGNC	HGNC:28026	-	-	-	-	-	-	-	-
OAR2_172701586.1	0.0323214	G	A	0.4719	G	A	0.3671	0.1048	2	164251758	MODIFIER	-	-	-	-	-	-	-	-	-	-	-	-	-	-	rs425658699	G	G/A	-	-	-	-	-	-	-	-	-	-	-	-	-
OAR2_62053767_X.1	0.0323744	T	C	0.3371	T	C	0.2413	0.0958	2	58215215	MODIFIER	-	ENSOARG00020030510	Transcript	ENSOART00020059672.1	lncRNA	-	5/5	-	-	-	-	-	-	-	-	T	T/C	-	-1	-	-	-	-	-	-	-	-	-	-	-
OAR6_35078443.1	0.0324194	G	T	0.4185	G	T	0.2867	0.1318	6	31776639	MODIFIER	GRID2	ENSOARG00020021077	Transcript	ENSOART00020033391.2	protein_coding	-	10/15	-	-	-	-	-	-	-	-	G	G/T	-	-1	-	HGNC	HGNC:4576	-	-	-	-	-	-	-	-
OAR6_35078443.1	0.0324194	G	T	0.4185	G	T	0.2867	0.1318	6	31776639	MODIFIER	GRID2	ENSOARG00020021077	Transcript	ENSOART00020033656.2	protein_coding	-	10/15	-	-	-	-	-	-	-	-	G	G/T	-	-1	-	HGNC	HGNC:4576	-	-	-	-	-	-	-	-
OAR6_35078443.1	0.0324194	G	T	0.4185	G	T	0.2867	0.1318	6	31776639	MODIFIER	GRID2	ENSOARG00020021077	Transcript	ENSOART00020033681.2	protein_coding	-	9/14	-	-	-	-	-	-	-	-	G	G/T	-	-1	-	HGNC	HGNC:4576	-	-	-	-	-	-	-	-
oar3_OAR20_13827597	0.0325056	C	A	0.3842	C	A	0.2762	0.108	20	13794874	MODIFIER	DAAM2	ENSOARG00020012995	Transcript	ENSOART00020019963.2	protein_coding	-	2/25	-	-	-	-	-	-	-	-	C	C/A	-	1	-	HGNC	HGNC:18143	-	-	-	-	-	-	-	-
oar3_OAR20_13827597	0.0325056	C	A	0.3842	C	A	0.2762	0.108	20	13794874	MODIFIER	DAAM2	ENSOARG00020012995	Transcript	ENSOART00020020198.2	protein_coding	-	2/24	-	-	-	-	-	-	-	-	C	C/A	-	1	-	HGNC	HGNC:18143	-	-	-	-	-	-	-	-
oar3_OAR20_13827597	0.0325056	C	A	0.3842	C	A	0.2762	0.108	20	13794874	MODIFIER	DAAM2	ENSOARG00020012995	Transcript	ENSOART00020041917.1	protein_coding	-	2/2	-	-	-	-	-	-	-	-	C	C/A	-	1	-	HGNC	HGNC:18143	-	-	-	-	-	-	-	-
OAR7_50718877.1	0.0325058	A	G	0.4101	G	A	0.486	0.1039	7	47141204	MODIFIER	RORA	ENSOARG00020019090	Transcript	ENSOART00020029576.2	protein_coding	-	3/12	-	-	-	-	-	-	-	rs398401995	A	A/G	-	1	-	Uniprot_gn	-	-	-	-	-	-	-	-	-
OAR7_50718877.1	0.0325058	A	G	0.4101	G	A	0.486	0.1039	7	47141204	MODIFIER	RORA	ENSOARG00020019090	Transcript	ENSOART00020029623.2	protein_coding	-	2/12	-	-	-	-	-	-	-	rs398401995	A	A/G	-	1	-	Uniprot_gn	-	-	-	-	-	-	-	-	-
oar3_OAR20_14389594	0.0325789	G	A	0.441	A	G	0.4545	0.1045	20	14348771	MODIFIER	LRFN2	ENSOARG00020013842	Transcript	ENSOART00020021113.2	protein_coding	-	3/3	-	-	-	-	-	-	-	rs411285320	G	G/A	-	-1	-	HGNC	HGNC:21226	-	-	-	-	-	-	-	-
oar3_OAR5_89038564	0.0328634	G	A	0.3483	G	A	0.4755	0.1272	5	89328575	MODIFIER	-	-	-	-	-	-	-	-	-	-	-	-	-	-	-	G	G/A	-	-	-	-	-	-	-	-	-	-	-	-	-
oar3_OAR3_51877144	0.0332773	A	G	0.2472	A	G	0.3427	0.0955	3	52028184	MODIFIER	-	-	-	-	-	-	-	-	-	-	-	-	-	-	rs413543374	A	A/G	-	-	-	-	-	-	-	-	-	-	-	-	-
OAR6_34189736.1	0.0333654	T	C	0.4884	T	C	0.3824	0.106	6	30990510	MODIFIER	SMARCAD1	ENSOARG00020020813	Transcript	ENSOART00020032133.2	protein_coding	-	10/22	-	-	-	-	-	-	-	-	T	T/C	-	-1	-	HGNC	HGNC:18398	-	-	-	-	-	-	-	-
OAR6_34189736.1	0.0333654	T	C	0.4884	T	C	0.3824	0.106	6	30990510	MODIFIER	SMARCAD1	ENSOARG00020020813	Transcript	ENSOART00020032308.2	protein_coding	-	10/23	-	-	-	-	-	-	-	-	T	T/C	-	-1	-	HGNC	HGNC:18398	-	-	-	-	-	-	-	-
OAR2_136140871.1	0.0334236	G	T	0.3034	G	T	0.4056	0.1022	2	128932054	MODIFIER	UBE2E3	ENSOARG00020019367	Transcript	ENSOART00020029791.2	protein_coding	-	3/7	-	-	-	-	-	-	-	rs409069183	G	G/T	-	-1	-	HGNC	HGNC:12479	-	-	-	-	-	-	-	-
OAR5_82336351.1	0.0335448	T	G	0.3362	T	G	0.4574	0.1212	5	75035656	MODIFIER	-	-	-	-	-	-	-	-	-	-	-	-	-	-	rs400091805	T	T/G	-	-	-	-	-	-	-	-	-	-	-	-	-
OAR24_15364787.1	0.0335535	C	A	0.3202	C	A	0.4161	0.0959	24	14289170	MODIFIER	PDXDC1	ENSOARG00020021455	Transcript	ENSOART00020033658.2	protein_coding	-	1/22	-	-	-	-	-	-	-	rs424183877	C	C/A	-	-1	-	HGNC	HGNC:28995	-	-	-	-	-	-	-	-
OAR24_15364787.1	0.0335535	C	A	0.3202	C	A	0.4161	0.0959	24	14289170	MODIFIER	PDXDC1	ENSOARG00020021455	Transcript	ENSOART00020043881.1	protein_coding	-	2/4	-	-	-	-	-	-	-	rs424183877	C	C/A	-	-1	-	HGNC	HGNC:28995	-	-	-	-	-	-	-	-
OAR24_15364787.1	0.0335535	C	A	0.3202	C	A	0.4161	0.0959	24	14289170	MODIFIER	PDXDC1	ENSOARG00020021455	Transcript	ENSOART00020045784.1	protein_coding	-	1/22	-	-	-	-	-	-	-	rs424183877	C	C/A	-	-1	-	HGNC	HGNC:28995	-	-	-	-	-	-	-	-
OAR24_15364787.1	0.0335535	C	A	0.3202	C	A	0.4161	0.0959	24	14289170	MODIFIER	PDXDC1	ENSOARG00020021455	Transcript	ENSOART00020053296.1	protein_coding	-	2/23	-	-	-	-	-	-	-	rs424183877	C	C/A	-	-1	-	HGNC	HGNC:28995	-	-	-	-	-	-	-	-
OAR24_15364787.1	0.0335535	C	A	0.3202	C	A	0.4161	0.0959	24	14289170	MODIFIER	PDXDC1	ENSOARG00020021455	Transcript	ENSOART00020063912.1	protein_coding	-	1/22	-	-	-	-	-	-	-	rs424183877	C	C/A	-	-1	-	HGNC	HGNC:28995	-	-	-	-	-	-	-	-
OAR24_15364787.1	0.0335535	C	A	0.3202	C	A	0.4161	0.0959	24	14289170	MODIFIER	PDXDC1	ENSOARG00020021455	Transcript	ENSOART00020074802.1	protein_coding	-	1/20	-	-	-	-	-	-	-	rs424183877	C	C/A	-	-1	-	HGNC	HGNC:28995	-	-	-	-	-	-	-	-
OAR24_15364787.1	0.0335535	C	A	0.3202	C	A	0.4161	0.0959	24	14289170	MODIFIER	PDXDC1	ENSOARG00020021455	Transcript	ENSOART00020075823.1	protein_coding	-	1/23	-	-	-	-	-	-	-	rs424183877	C	C/A	-	-1	-	HGNC	HGNC:28995	-	-	-	-	-	-	-	-
oar3_OAR24_13757809	0.0335535	G	A	0.3202	G	A	0.4161	0.0959	24	14285385	MODIFIER	PDXDC1	ENSOARG00020021455	Transcript	ENSOART00020033658.2	protein_coding	-	1/22	-	-	-	-	-	-	-	rs430247565	G	G/A	-	-1	-	HGNC	HGNC:28995	-	-	-	-	-	-	-	-
oar3_OAR24_13757809	0.0335535	G	A	0.3202	G	A	0.4161	0.0959	24	14285385	MODIFIER	PDXDC1	ENSOARG00020021455	Transcript	ENSOART00020043881.1	protein_coding	-	2/4	-	-	-	-	-	-	-	rs430247565	G	G/A	-	-1	-	HGNC	HGNC:28995	-	-	-	-	-	-	-	-
oar3_OAR24_13757809	0.0335535	G	A	0.3202	G	A	0.4161	0.0959	24	14285385	MODIFIER	PDXDC1	ENSOARG00020021455	Transcript	ENSOART00020045784.1	protein_coding	-	1/22	-	-	-	-	-	-	-	rs430247565	G	G/A	-	-1	-	HGNC	HGNC:28995	-	-	-	-	-	-	-	-
oar3_OAR24_13757809	0.0335535	G	A	0.3202	G	A	0.4161	0.0959	24	14285385	MODIFIER	PDXDC1	ENSOARG00020021455	Transcript	ENSOART00020053296.1	protein_coding	-	2/23	-	-	-	-	-	-	-	rs430247565	G	G/A	-	-1	-	HGNC	HGNC:28995	-	-	-	-	-	-	-	-
oar3_OAR24_13757809	0.0335535	G	A	0.3202	G	A	0.4161	0.0959	24	14285385	MODIFIER	PDXDC1	ENSOARG00020021455	Transcript	ENSOART00020063912.1	protein_coding	-	1/22	-	-	-	-	-	-	-	rs430247565	G	G/A	-	-1	-	HGNC	HGNC:28995	-	-	-	-	-	-	-	-
oar3_OAR24_13757809	0.0335535	G	A	0.3202	G	A	0.4161	0.0959	24	14285385	MODIFIER	PDXDC1	ENSOARG00020021455	Transcript	ENSOART00020074802.1	protein_coding	-	1/20	-	-	-	-	-	-	-	rs430247565	G	G/A	-	-1	-	HGNC	HGNC:28995	-	-	-	-	-	-	-	-
oar3_OAR24_13757809	0.0335535	G	A	0.3202	G	A	0.4161	0.0959	24	14285385	MODIFIER	PDXDC1	ENSOARG00020021455	Transcript	ENSOART00020075823.1	protein_coding	-	1/23	-	-	-	-	-	-	-	rs430247565	G	G/A	-	-1	-	HGNC	HGNC:28995	-	-	-	-	-	-	-	-
OAR6_16202930.1	0.033821	T	G	0.4857	G	T	0.4049	0.1094	6	13792337	MODIFIER	-	-	-	-	-	-	-	-	-	-	-	-	-	-	-	T	T/G	-	-	-	-	-	-	-	-	-	-	-	-	-
s12848.1	0.0343616	T	C	0.4663	T	C	0.3706	0.0957	2	192884985	MODIFIER	TEX51	ENSOARG00020025725	Transcript	ENSOART00020040383.2	protein_coding	-	4/7	-	-	-	-	-	-	-	-	T	T/C	-	1	-	HGNC	HGNC:52387	-	-	-	-	-	-	-	-
OAR2_180932811.1	0.0346898	A	G	0.3708	A	G	0.2517	0.1191	2	171764833	MODIFIER	-	-	-	-	-	-	-	-	-	-	-	-	-	-	-	A	A/G	-	-	-	-	-	-	-	-	-	-	-	-	-
OAR3_221808319.1	0.0349106	A	G	0.4943	A	G	0.3944	0.0999	3	206714517	MODIFIER	A2ML1	ENSOARG00020008047	Transcript	ENSOART00020012458.2	protein_coding	-	3/35	-	-	-	-	-	-	-	rs403786172	A	A/G	-	-1	-	HGNC	HGNC:23336	-	-	-	-	-	-	-	-
s61131.1	0.0356485	A	G	0.4213	A	G	0.3217	0.0996	13	13180109	MODIFIER	-	-	-	-	-	-	-	-	-	-	-	-	-	-	-	A	A/G	-	-	-	-	-	-	-	-	-	-	-	-	-
OAR17_45415140.1	0.0357436	A	G	0.4382	A	G	0.3287	0.1095	17	42457686	MODIFIER	PDGFC	ENSOARG00020019005	Transcript	ENSOART00020029239.2	protein_coding	-	2/6	-	-	-	-	-	-	-	rs399387777	A	A/G	-	1	-	HGNC	HGNC:8801	-	-	-	-	-	-	-	-
OAR17_45415140.1	0.0357436	A	G	0.4382	A	G	0.3287	0.1095	17	42457686	MODIFIER	PDGFC	ENSOARG00020019005	Transcript	ENSOART00020055260.1	protein_coding	-	1/6	-	-	-	-	-	-	-	rs399387777	A	A/G	-	1	-	HGNC	HGNC:8801	-	-	-	-	-	-	-	-
OAR17_45415140.1	0.0357436	A	G	0.4382	A	G	0.3287	0.1095	17	42457686	MODIFIER	PDGFC	ENSOARG00020019005	Transcript	ENSOART00020061526.1	protein_coding	-	1/6	-	-	-	-	-	-	-	rs399387777	A	A/G	-	1	-	HGNC	HGNC:8801	-	-	-	-	-	-	-	-
oar3_OAR1_33554744	0.035803	T	C	0.4857	T	C	0.3803	0.1054	1	33800970	MODIFIER	-	ENSOARG00020038403	Transcript	ENSOART00020054418.1	lncRNA	-	-	-	-	-	-	-	-	-	-	T	T/C	1059	1	-	-	-	-	-	-	-	-	-	-	-
oar3_OAR1_33554744	0.035803	T	C	0.4857	T	C	0.3803	0.1054	1	33800970	MODIFIER	-	ENSOARG00020038403	Transcript	ENSOART00020057586.1	lncRNA	-	-	-	-	-	-	-	-	-	-	T	T/C	1059	1	-	-	-	-	-	-	-	-	-	-	-
oar3_OAR1_33554744	0.035803	T	C	0.4857	T	C	0.3803	0.1054	1	33800970	MODIFIER	-	ENSOARG00020033840	Transcript	ENSOART00020071790.1	lncRNA	-	1/3	-	-	-	-	-	-	-	-	T	T/C	-	-1	-	-	-	-	-	-	-	-	-	-	-
oar3_OAR1_163577736	0.0358348	T	C	0.4972	C	T	0.4056	0.0972	1	166038755	MODIFIER	-	-	-	-	-	-	-	-	-	-	-	-	-	-	-	T	T/C	-	-	-	-	-	-	-	-	-	-	-	-	-
s50651.1	0.0360442	A	G	0.2865	A	G	0.3986	0.1121	12	41004260	MODIFIER	PLOD1	ENSOARG00020011521	Transcript	ENSOART00020017550.2	protein_coding	-	1/18	-	-	-	-	-	-	-	-	A	A/G	-	-1	-	HGNC	HGNC:9081	-	-	-	-	-	-	-	-
LD_OZ_OAR5_110500655.1	0.0369675	A	G	0.3399	A	G	0.2308	0.1091	5	101843411	MODIFIER	-	-	-	-	-	-	-	-	-	-	-	-	-	-	rs426309627	A	A/G	-	-	-	-	-	-	-	-	-	-	-	-	-
oar3_OAR15_67080948	0.0371132	G	A	0.4101	A	G	0.472	0.1179	15	67830792	MODIFIER	-	-	-	-	-	-	-	-	-	-	-	-	-	-	rs426932450	G	G/A	-	-	-	-	-	-	-	-	-	-	-	-	-
Chr11:6486805	0.0372205	G	T	0.4631	T	G	0.4371	0.0998	11	6634979	MODIFIER	ANKFN1	ENSOARG00020022964	Transcript	ENSOART00020036024.2	protein_coding	-	3/21	-	-	-	-	-	-	-	-	G	G/T	-	1	-	HGNC	HGNC:26766	-	-	-	-	-	-	-	-
Chr11:6486805	0.0372205	G	T	0.4631	T	G	0.4371	0.0998	11	6634979	MODIFIER	ANKFN1	ENSOARG00020022964	Transcript	ENSOART00020036069.2	protein_coding	-	1/19	-	-	-	-	-	-	-	-	G	G/T	-	1	-	HGNC	HGNC:26766	-	-	-	-	-	-	-	-
s68492.1	0.0372793	C	T	0.3483	C	T	0.4441	0.0958	5	46159342	MODIFIER	SPOCK1	ENSOARG00020011504	Transcript	ENSOART00020017688.2	protein_coding	-	4/9	-	-	-	-	-	-	-	-	C	C/T	-	-1	-	HGNC	HGNC:11251	-	-	-	-	-	-	-	-
s68492.1	0.0372793	C	T	0.3483	C	T	0.4441	0.0958	5	46159342	MODIFIER	SPOCK1	ENSOARG00020011504	Transcript	ENSOART00020067643.1	protein_coding	-	5/10	-	-	-	-	-	-	-	-	C	C/T	-	-1	-	HGNC	HGNC:11251	-	-	-	-	-	-	-	-
s68492.1	0.0372793	C	T	0.3483	C	T	0.4441	0.0958	5	46159342	MODIFIER	SPOCK1	ENSOARG00020011504	Transcript	ENSOART00020075511.1	protein_coding	-	5/10	-	-	-	-	-	-	-	-	C	C/T	-	-1	-	HGNC	HGNC:11251	-	-	-	-	-	-	-	-
Chr13:79783093	0.037352	G	A	0.3567	G	A	0.2571	0.0996	13	80241474	MODIFIER	-	-	-	-	-	-	-	-	-	-	-	-	-	-	-	G	G/A	-	-	-	-	-	-	-	-	-	-	-	-	-
oar3_OAR6_31762532	0.0379191	G	A	0.3051	G	A	0.4091	0.104	6	32422990	MODIFIER	GRID2	ENSOARG00020021077	Transcript	ENSOART00020033391.2	protein_coding	-	2/15	-	-	-	-	-	-	-	-	G	G/A	-	-1	-	HGNC	HGNC:4576	-	-	-	-	-	-	-	-
oar3_OAR6_31762532	0.0379191	G	A	0.3051	G	A	0.4091	0.104	6	32422990	MODIFIER	GRID2	ENSOARG00020021077	Transcript	ENSOART00020033656.2	protein_coding	-	2/15	-	-	-	-	-	-	-	-	G	G/A	-	-1	-	HGNC	HGNC:4576	-	-	-	-	-	-	-	-
oar3_OAR6_31762532	0.0379191	G	A	0.3051	G	A	0.4091	0.104	6	32422990	MODIFIER	GRID2	ENSOARG00020021077	Transcript	ENSOART00020033681.2	protein_coding	-	2/14	-	-	-	-	-	-	-	-	G	G/A	-	-1	-	HGNC	HGNC:4576	-	-	-	-	-	-	-	-
oar3_OAR13_27714199	0.0379903	A	G	0.4803	A	G	0.3846	0.0957	13	28032071	MODIFIER	FRMD4A	ENSOARG00020003547	Transcript	ENSOART00020005507.2	protein_coding	-	1/22	-	-	-	-	-	-	-	rs425413701	A	A/G	-	-1	-	HGNC	HGNC:25491	-	-	-	-	-	-	-	-
oar3_OAR13_27714199	0.0379903	A	G	0.4803	A	G	0.3846	0.0957	13	28032071	MODIFIER	FRMD4A	ENSOARG00020003547	Transcript	ENSOART00020005628.2	protein_coding	-	3/24	-	-	-	-	-	-	-	rs425413701	A	A/G	-	-1	-	HGNC	HGNC:25491	-	-	-	-	-	-	-	-
oar3_OAR13_27714199	0.0379903	A	G	0.4803	A	G	0.3846	0.0957	13	28032071	MODIFIER	FRMD4A	ENSOARG00020003547	Transcript	ENSOART00020005721.2	protein_coding	-	1/22	-	-	-	-	-	-	-	rs425413701	A	A/G	-	-1	-	HGNC	HGNC:25491	-	-	-	-	-	-	-	-
oar3_OAR13_27714199	0.0379903	A	G	0.4803	A	G	0.3846	0.0957	13	28032071	MODIFIER	FRMD4A	ENSOARG00020003547	Transcript	ENSOART00020005753.2	protein_coding	-	2/23	-	-	-	-	-	-	-	rs425413701	A	A/G	-	-1	-	HGNC	HGNC:25491	-	-	-	-	-	-	-	-
oar3_OAR13_27714199	0.0379903	A	G	0.4803	A	G	0.3846	0.0957	13	28032071	MODIFIER	FRMD4A	ENSOARG00020003547	Transcript	ENSOART00020050660.1	protein_coding	-	2/21	-	-	-	-	-	-	-	rs425413701	A	A/G	-	-1	-	HGNC	HGNC:25491	-	-	-	-	-	-	-	-
OAR2_202599712.1	0.0380988	T	C	0.4943	C	T	0.3972	0.1085	2	192231676	MODIFIER	-	-	-	-	-	-	-	-	-	-	-	-	-	-	-	T	T/C	-	-	-	-	-	-	-	-	-	-	-	-	-
oar3_OAR13_72845492	0.0382459	T	C	0.236	T	C	0.3322	0.0962	13	73240605	MODIFIER	YWHAB	ENSOARG00020011459	Transcript	ENSOART00020017458.2	protein_coding	-	-	-	-	-	-	-	-	-	rs428587857	T	T/C	1153	1	-	HGNC	HGNC:12849	-	-	-	-	-	-	-	-
oar3_OAR2_219569259	0.0383207	A	G	0.3371	A	G	0.2413	0.0958	2	220591671	MODIFIER	PLCD4	ENSOARG00020007976	Transcript	ENSOART00020012243.2	protein_coding	-	1/16	-	-	-	-	-	-	-	-	A	A/G	-	1	-	HGNC	HGNC:9062	-	-	-	-	-	-	-	-
oar3_OAR2_219569259	0.0383207	A	G	0.3371	A	G	0.2413	0.0958	2	220591671	MODIFIER	PLCD4	ENSOARG00020007976	Transcript	ENSOART00020012286.2	protein_coding	-	1/15	-	-	-	-	-	-	-	-	A	A/G	-	1	-	HGNC	HGNC:9062	-	-	-	-	-	-	-	-
oar3_OAR9_16312752	0.038403	G	A	0.3371	G	A	0.4336	0.0965	9	16374966	MODIFIER	TRAPPC9	ENSOARG00020005244	Transcript	ENSOART00020008023.2	protein_coding	-	19/23	-	-	-	-	-	-	-	rs400010464	G	G/A	-	1	-	HGNC	HGNC:30832	-	-	-	-	-	-	-	-
oar3_OAR9_16312752	0.038403	G	A	0.3371	G	A	0.4336	0.0965	9	16374966	MODIFIER	TRAPPC9	ENSOARG00020005244	Transcript	ENSOART00020052299.1	protein_coding	-	19/22	-	-	-	-	-	-	-	rs400010464	G	G/A	-	1	-	HGNC	HGNC:30832	-	-	-	-	-	-	-	-
oar3_OAR1_103590507	0.0385124	G	A	0.2837	G	A	0.1818	0.1019	1	105016729	MODIFIER	KCNN3	ENSOARG00020002194	Transcript	ENSOART00020003425.2	protein_coding	-	2/8	-	-	-	-	-	-	-	-	G	G/A	-	-1	-	HGNC	HGNC:6292	-	-	-	-	-	-	-	-
oar3_OAR1_103590507	0.0385124	G	A	0.2837	G	A	0.1818	0.1019	1	105016729	MODIFIER	KCNN3	ENSOARG00020002194	Transcript	ENSOART00020003439.2	protein_coding	-	2/8	-	-	-	-	-	-	-	-	G	G/A	-	-1	-	HGNC	HGNC:6292	-	-	-	-	-	-	-	-
oar3_OAR1_21965265	0.0385489	A	C	0.2893	A	C	0.1923	0.097	1	22207758	MODIFIER	-	-	-	-	-	-	-	-	-	-	-	-	-	-	-	A	A/C	-	-	-	-	-	-	-	-	-	-	-	-	-
oar3_OAR2_1606642	0.0386148	A	C	0.4438	A	C	0.3287	0.1151	2	1671964	MODIFIER	-	-	-	-	-	-	-	-	-	-	-	-	-	-	rs424466185	A	A/C	-	-	-	-	-	-	-	-	-	-	-	-	-
OAR4_88774962.1	0.0388655	A	G	0.3006	A	G	0.404	0.1034	4	85082572	MODIFIER	-	-	-	-	-	-	-	-	-	-	-	-	-	-	rs414361655	A	A/G	-	-	-	-	-	-	-	-	-	-	-	-	-
oar3_OAR3_107332575	0.0397818	A	C	0.3989	A	C	0.2993	0.0996	3	107489841	MODIFIER	-	-	-	-	-	-	-	-	-	-	-	-	-	-	-	A	A/C	-	-	-	-	-	-	-	-	-	-	-	-	-
s63900.1	0.0407811	T	C	0.3511	T	C	0.451	0.0999	3	103972130	MODIFIER	NEURL3	ENSOARG00020018508	Transcript	ENSOART00020028596.2	protein_coding	-	-	-	-	-	-	-	-	-	-	T	T/C	4365	1	-	HGNC	HGNC:25162	-	-	-	-	-	-	-	-
oar3_OAR3_216967747	0.0409053	C	T	0.3192	C	T	0.4231	0.1039	3	218796784	MODIFIER	SMIM45	ENSOARG00020024917	Transcript	ENSOART00020039019.2	protein_coding	-	-	-	-	-	-	-	-	-	-	C	C/T	461	1	-	HGNC	HGNC:27930	-	-	-	-	-	-	-	-
s45480.1	0.0410892	A	G	0.3448	A	G	0.2372	0.1076	17	59339493	MODIFIER	-	-	-	-	-	-	-	-	-	-	-	-	-	-	-	A	A/G	-	-	-	-	-	-	-	-	-	-	-	-	-
oar3_OAR3_89581350	0.0412272	C	T	0.382	C	T	0.486	0.104	3	89666371	MODIFIER	-	-	-	-	-	-	-	-	-	-	-	-	-	-	rs412862092	C	C/T	-	-	-	-	-	-	-	-	-	-	-	-	-
oar3_OAR3_52047158	0.0412482	A	G	0.2921	A	G	0.3951	0.103	3	52193783	MODIFIER	-	-	-	-	-	-	-	-	-	-	-	-	-	-	rs399751429	A	A/G	-	-	-	-	-	-	-	-	-	-	-	-	-
oar3_OAR2_131882730	0.0415011	A	G	0.4737	G	A	0.4179	0.1084	2	133011090	MODIFIER	-	-	-	-	-	-	-	-	-	-	-	-	-	-	rs420562138	A	A/G	-	-	-	-	-	-	-	-	-	-	-	-	-
OAR5_586245.1	0.0415194	G	T	0.3596	G	T	0.465	0.1054	5	430570	MODIFIER	CNOT6	ENSOARG00020010403	Transcript	ENSOART00020015907.2	protein_coding	-	8/12	-	-	-	-	-	-	-	rs399811497	G	G/T	-	-1	-	HGNC	HGNC:14099	-	-	-	-	-	-	-	-
s09308.1	0.0415812	C	T	0.4972	T	C	0.3776	0.1252	10	81661126	MODIFIER	EFNB2	ENSOARG00020003256	Transcript	ENSOART00020004979.2	protein_coding	-	1/3	-	-	-	-	-	-	-	rs428823424	C	C/T	-	-1	-	HGNC	HGNC:3227	-	-	-	-	-	-	-	-
s09308.1	0.0415812	C	T	0.4972	T	C	0.3776	0.1252	10	81661126	MODIFIER	EFNB2	ENSOARG00020003256	Transcript	ENSOART00020044972.1	protein_coding	-	1/5	-	-	-	-	-	-	-	rs428823424	C	C/T	-	-1	-	HGNC	HGNC:3227	-	-	-	-	-	-	-	-
s46446.1	0.0421036	A	C	0.4551	A	C	0.3497	0.1054	1	91567192	MODIFIER	-	-	-	-	-	-	-	-	-	-	-	-	-	-	-	A	A/C	-	-	-	-	-	-	-	-	-	-	-	-	-
oar3_OAR6_22493217	0.0423653	G	A	0.4607	A	G	0.4266	0.1127	6	22727555	MODIFIER	-	-	-	-	-	-	-	-	-	-	-	-	-	-	rs405341880	G	G/A	-	-	-	-	-	-	-	-	-	-	-	-	-
oar3_OAR21_8997878	0.0429266	G	A	0.4607	A	G	0.4336	0.1057	21	9095027	MODIFIER	PICALM	ENSOARG00020013638	Transcript	ENSOART00020021204.2	protein_coding	-	4/20	-	-	-	-	-	-	-	-	G	G/A	-	1	-	HGNC	HGNC:15514	-	-	-	-	-	-	-	-
oar3_OAR21_8997878	0.0429266	G	A	0.4607	A	G	0.4336	0.1057	21	9095027	MODIFIER	PICALM	ENSOARG00020013638	Transcript	ENSOART00020021435.2	protein_coding	-	4/18	-	-	-	-	-	-	-	-	G	G/A	-	1	-	HGNC	HGNC:15514	-	-	-	-	-	-	-	-
oar3_OAR21_8997878	0.0429266	G	A	0.4607	A	G	0.4336	0.1057	21	9095027	MODIFIER	PICALM	ENSOARG00020013638	Transcript	ENSOART00020021489.2	protein_coding	-	4/18	-	-	-	-	-	-	-	-	G	G/A	-	1	-	HGNC	HGNC:15514	-	-	-	-	-	-	-	-
oar3_OAR21_8997878	0.0429266	G	A	0.4607	A	G	0.4336	0.1057	21	9095027	MODIFIER	PICALM	ENSOARG00020013638	Transcript	ENSOART00020021753.2	protein_coding	-	4/20	-	-	-	-	-	-	-	-	G	G/A	-	1	-	HGNC	HGNC:15514	-	-	-	-	-	-	-	-
oar3_OAR21_8997878	0.0429266	G	A	0.4607	A	G	0.4336	0.1057	21	9095027	MODIFIER	PICALM	ENSOARG00020013638	Transcript	ENSOART00020021819.2	protein_coding	-	-	-	-	-	-	-	-	-	-	G	G/A	3548	1	-	HGNC	HGNC:15514	-	-	-	-	-	-	-	-
oar3_OAR21_8997878	0.0429266	G	A	0.4607	A	G	0.4336	0.1057	21	9095027	MODIFIER	PICALM	ENSOARG00020013638	Transcript	ENSOART00020041662.1	protein_coding	-	4/20	-	-	-	-	-	-	-	-	G	G/A	-	1	-	HGNC	HGNC:15514	-	-	-	-	-	-	-	-
oar3_OAR21_8997878	0.0429266	G	A	0.4607	A	G	0.4336	0.1057	21	9095027	MODIFIER	PICALM	ENSOARG00020013638	Transcript	ENSOART00020046236.1	protein_coding	-	4/21	-	-	-	-	-	-	-	-	G	G/A	-	1	-	HGNC	HGNC:15514	-	-	-	-	-	-	-	-
oar3_OAR21_8997878	0.0429266	G	A	0.4607	A	G	0.4336	0.1057	21	9095027	MODIFIER	PICALM	ENSOARG00020013638	Transcript	ENSOART00020060611.1	protein_coding	-	4/19	-	-	-	-	-	-	-	-	G	G/A	-	1	-	HGNC	HGNC:15514	-	-	-	-	-	-	-	-
oar3_OAR21_8997878	0.0429266	G	A	0.4607	A	G	0.4336	0.1057	21	9095027	MODIFIER	PICALM	ENSOARG00020013638	Transcript	ENSOART00020074529.1	protein_coding	-	4/20	-	-	-	-	-	-	-	-	G	G/A	-	1	-	HGNC	HGNC:15514	-	-	-	-	-	-	-	-
OAR7_41701784.1	0.0429391	T	G	0.427	T	G	0.3182	0.1088	7	38798167	MODIFIER	MDGA2	ENSOARG00020020011	Transcript	ENSOART00020031026.2	protein_coding	-	1/16	-	-	-	-	-	-	-	rs418176364	T	T/G	-	-1	-	HGNC	HGNC:19835	-	-	-	-	-	-	-	-
oar3_OAR1_270648128	0.0429889	G	A	0.3258	G	A	0.4336	0.1078	1	273635328	MODIFIER	-	ENSOARG00020028526	Transcript	ENSOART00020054095.1	protein_coding	-	1/1	-	-	-	-	-	-	-	-	G	G/A	-	-1	-	-	-	-	-	-	-	-	-	-	-
oar3_OAR1_270648128	0.0429889	G	A	0.3258	G	A	0.4336	0.1078	1	273635328	MODIFIER	-	ENSOARG00020032694	Transcript	ENSOART00020066596.1	protein_coding	-	-	-	-	-	-	-	-	-	-	G	G/A	2483	-1	-	-	-	-	-	-	-	-	-	-	-
oar3_OAR1_270648128	0.0429889	G	A	0.3258	G	A	0.4336	0.1078	1	273635328	MODIFIER	-	ENSOARG00020032694	Transcript	ENSOART00020079540.1	protein_coding	1/1	-	-	-	9704	-	-	-	-	-	G	G/A	-	-1	-	-	-	-	-	-	-	-	-	-	-
oar3_OAR1_270648128	0.0429889	G	A	0.3258	G	A	0.4336	0.1078	1	273635328	MODIFIER	HACL1	ENSOARG00020020063	Transcript	ENSOART00020031068.2	protein_coding	-	3/9	-	-	-	-	-	-	-	-	G	G/A	-	-1	-	HGNC	HGNC:17856	-	-	-	-	-	-	-	-
oar3_OAR1_270648128	0.0429889	G	A	0.3258	G	A	0.4336	0.1078	1	273635328	MODIFIER	HACL1	ENSOARG00020020063	Transcript	ENSOART00020031305.2	protein_coding	-	8/15	-	-	-	-	-	-	-	-	G	G/A	-	-1	-	HGNC	HGNC:17856	-	-	-	-	-	-	-	-
oar3_OAR1_270648128	0.0429889	G	A	0.3258	G	A	0.4336	0.1078	1	273635328	MODIFIER	HACL1	ENSOARG00020020063	Transcript	ENSOART00020031427.2	protein_coding	-	9/16	-	-	-	-	-	-	-	-	G	G/A	-	-1	-	HGNC	HGNC:17856	-	-	-	-	-	-	-	-
oar3_OAR1_270648128	0.0429889	G	A	0.3258	G	A	0.4336	0.1078	1	273635328	MODIFIER	HACL1	ENSOARG00020020063	Transcript	ENSOART00020031466.2	protein_coding	-	8/14	-	-	-	-	-	-	-	-	G	G/A	-	-1	-	HGNC	HGNC:17856	-	-	-	-	-	-	-	-
oar3_OAR1_270648128	0.0429889	G	A	0.3258	G	A	0.4336	0.1078	1	273635328	MODIFIER	HACL1	ENSOARG00020020063	Transcript	ENSOART00020031515.2	protein_coding	-	6/13	-	-	-	-	-	-	-	-	G	G/A	-	-1	-	HGNC	HGNC:17856	-	-	-	-	-	-	-	-
oar3_OAR1_270648128	0.0429889	G	A	0.3258	G	A	0.4336	0.1078	1	273635328	MODIFIER	HACL1	ENSOARG00020020063	Transcript	ENSOART00020031569.2	protein_coding	-	9/16	-	-	-	-	-	-	-	-	G	G/A	-	-1	-	HGNC	HGNC:17856	-	-	-	-	-	-	-	-
oar3_OAR1_270648128	0.0429889	G	A	0.3258	G	A	0.4336	0.1078	1	273635328	MODIFIER	HACL1	ENSOARG00020020063	Transcript	ENSOART00020054489.1	protein_coding	-	9/16	-	-	-	-	-	-	-	-	G	G/A	-	-1	-	HGNC	HGNC:17856	-	-	-	-	-	-	-	-
OAR12_42693133.1	0.0439017	C	T	0.4101	T	C	0.4755	0.1144	12	39410438	MODIFIER	-	-	-	-	-	-	-	-	-	-	-	-	-	-	rs400334724	C	C/T	-	-	-	-	-	-	-	-	-	-	-	-	-
OAR2_55493630_X.1	0.0440958	C	T	0.3624	C	T	0.458	0.0956	2	52199852	MODIFIER	RNF38	ENSOARG00020003904	Transcript	ENSOART00020006023.2	protein_coding	-	2/11	-	-	-	-	-	-	-	-	C	C/T	-	1	-	HGNC	HGNC:18052	-	-	-	-	-	-	-	-
OAR2_55493630_X.1	0.0440958	C	T	0.3624	C	T	0.458	0.0956	2	52199852	MODIFIER	RNF38	ENSOARG00020003904	Transcript	ENSOART00020048340.1	protein_coding	-	2/11	-	-	-	-	-	-	-	-	C	C/T	-	1	-	HGNC	HGNC:18052	-	-	-	-	-	-	-	-
OAR2_55493630_X.1	0.0440958	C	T	0.3624	C	T	0.458	0.0956	2	52199852	MODIFIER	RNF38	ENSOARG00020003904	Transcript	ENSOART00020050883.1	protein_coding	-	2/11	-	-	-	-	-	-	-	-	C	C/T	-	1	-	HGNC	HGNC:18052	-	-	-	-	-	-	-	-
OAR2_55493630_X.1	0.0440958	C	T	0.3624	C	T	0.458	0.0956	2	52199852	MODIFIER	RNF38	ENSOARG00020003904	Transcript	ENSOART00020051837.1	protein_coding	-	4/13	-	-	-	-	-	-	-	-	C	C/T	-	1	-	HGNC	HGNC:18052	-	-	-	-	-	-	-	-
OAR2_55493630_X.1	0.0440958	C	T	0.3624	C	T	0.458	0.0956	2	52199852	MODIFIER	RNF38	ENSOARG00020003904	Transcript	ENSOART00020053693.1	protein_coding	-	2/11	-	-	-	-	-	-	-	-	C	C/T	-	1	-	HGNC	HGNC:18052	-	-	-	-	-	-	-	-
OAR2_55493630_X.1	0.0440958	C	T	0.3624	C	T	0.458	0.0956	2	52199852	MODIFIER	RNF38	ENSOARG00020003904	Transcript	ENSOART00020055850.1	protein_coding	-	3/12	-	-	-	-	-	-	-	-	C	C/T	-	1	-	HGNC	HGNC:18052	-	-	-	-	-	-	-	-
OAR2_55493630_X.1	0.0440958	C	T	0.3624	C	T	0.458	0.0956	2	52199852	MODIFIER	RNF38	ENSOARG00020003904	Transcript	ENSOART00020061223.1	protein_coding	-	3/12	-	-	-	-	-	-	-	-	C	C/T	-	1	-	HGNC	HGNC:18052	-	-	-	-	-	-	-	-
OAR2_55493630_X.1	0.0440958	C	T	0.3624	C	T	0.458	0.0956	2	52199852	MODIFIER	RNF38	ENSOARG00020003904	Transcript	ENSOART00020068984.1	protein_coding	-	3/12	-	-	-	-	-	-	-	-	C	C/T	-	1	-	HGNC	HGNC:18052	-	-	-	-	-	-	-	-
OAR2_55493630_X.1	0.0440958	C	T	0.3624	C	T	0.458	0.0956	2	52199852	MODIFIER	RNF38	ENSOARG00020003904	Transcript	ENSOART00020070267.1	protein_coding	-	2/12	-	-	-	-	-	-	-	-	C	C/T	-	1	-	HGNC	HGNC:18052	-	-	-	-	-	-	-	-
OAR2_55493630_X.1	0.0440958	C	T	0.3624	C	T	0.458	0.0956	2	52199852	MODIFIER	RNF38	ENSOARG00020003904	Transcript	ENSOART00020070435.1	protein_coding	-	2/11	-	-	-	-	-	-	-	-	C	C/T	-	1	-	HGNC	HGNC:18052	-	-	-	-	-	-	-	-
oar3_OAR2_51963252	0.0440958	C	T	0.3624	C	T	0.458	0.0956	2	52265055	MODIFIER	-	-	-	-	-	-	-	-	-	-	-	-	-	-	rs407231191	C	C/T	-	-	-	-	-	-	-	-	-	-	-	-	-
s15286.1	0.0447638	A	G	0.3736	A	G	0.472	0.0984	12	62331466	MODIFIER	CACNA1E	ENSOARG00020024093	Transcript	ENSOART00020038041.2	protein_coding	-	37/49	-	-	-	-	-	-	-	rs398349547	A	A/G	-	1	-	HGNC	HGNC:1392	-	-	-	-	-	-	-	-
s15286.1	0.0447638	A	G	0.3736	A	G	0.472	0.0984	12	62331466	MODIFIER	CACNA1E	ENSOARG00020024093	Transcript	ENSOART00020065473.1	protein_coding	-	32/43	-	-	-	-	-	-	-	rs398349547	A	A/G	-	1	-	HGNC	HGNC:1392	-	-	-	-	-	-	-	-
s15286.1	0.0447638	A	G	0.3736	A	G	0.472	0.0984	12	62331466	MODIFIER	CACNA1E	ENSOARG00020024093	Transcript	ENSOART00020077717.1	protein_coding	-	36/48	-	-	-	-	-	-	-	rs398349547	A	A/G	-	1	-	HGNC	HGNC:1392	-	-	-	-	-	-	-	-
OAR9_19134963.1	0.0448558	C	T	0.4522	C	T	0.3531	0.0991	9	18527951	MODIFIER	-	-	-	-	-	-	-	-	-	-	-	-	-	-	rs419365012	C	C/T	-	-	-	-	-	-	-	-	-	-	-	-	-
OAR10_46017136.1	0.0453116	T	G	0.3736	T	G	0.4755	0.1019	10	45637176	MODIFIER	-	-	-	-	-	-	-	-	-	-	-	-	-	-	-	T	T/G	-	-	-	-	-	-	-	-	-	-	-	-	-
OAR3_166796016.1	0.0460134	A	G	0.2784	A	G	0.3846	0.1062	3	156132659	MODIFIER	-	-	-	-	-	-	-	-	-	-	-	-	-	-	-	A	A/G	-	-	-	-	-	-	-	-	-	-	-	-	-
oar3_OAR8_10460878	0.046023	A	C	0.4747	C	A	0.4266	0.0987	8	10572450	MODIFIER	ME1	ENSOARG00020017565	Transcript	ENSOART00020027070.2	protein_coding	-	2/13	-	-	-	-	-	-	-	-	A	A/C	-	-1	-	EntrezGene	-	-	-	-	-	-	-	-	-
oar3_OAR8_10460878	0.046023	A	C	0.4747	C	A	0.4266	0.0987	8	10572450	MODIFIER	ME1	ENSOARG00020017565	Transcript	ENSOART00020027113.2	protein_coding	-	2/13	-	-	-	-	-	-	-	-	A	A/C	-	-1	-	EntrezGene	-	-	-	-	-	-	-	-	-
oar3_OAR8_10460878	0.046023	A	C	0.4747	C	A	0.4266	0.0987	8	10572450	MODIFIER	ME1	ENSOARG00020017565	Transcript	ENSOART00020057187.1	protein_coding	-	4/15	-	-	-	-	-	-	-	-	A	A/C	-	-1	-	EntrezGene	-	-	-	-	-	-	-	-	-
oar3_OAR20_31649057	0.0464052	A	G	0.4129	G	A	0.479	0.1081	20	31721470	MODIFIER	-	ENSOARG00020009577	Transcript	ENSOART00020014684.2	protein_coding	-	6/16	-	-	-	-	-	-	-	-	A	A/G	-	1	-	-	-	-	-	-	-	-	-	-	-
oar3_OAR20_31649057	0.0464052	A	G	0.4129	G	A	0.479	0.1081	20	31721470	MODIFIER	-	ENSOARG00020009577	Transcript	ENSOART00020014779.2	protein_coding	-	6/10	-	-	-	-	-	-	-	-	A	A/G	-	1	-	-	-	-	-	-	-	-	-	-	-
oar3_OAR20_31649057	0.0464052	A	G	0.4129	G	A	0.479	0.1081	20	31721470	MODIFIER	-	ENSOARG00020009577	Transcript	ENSOART00020071152.1	protein_coding	-	6/10	-	-	-	-	-	-	-	-	A	A/G	-	1	-	-	-	-	-	-	-	-	-	-	-
s58169.1	0.0464828	G	A	0.4407	G	A	0.3322	0.1085	3	35259070	MODIFIER	BABAM2	ENSOARG00020004260	Transcript	ENSOART00020006505.2	protein_coding	-	12/12	-	-	-	-	-	-	-	rs420091271	G	G/A	-	1	-	Uniprot_gn	-	-	-	-	-	-	-	-	-
s58169.1	0.0464828	G	A	0.4407	G	A	0.3322	0.1085	3	35259070	MODIFIER	BABAM2	ENSOARG00020004260	Transcript	ENSOART00020053726.1	protein_coding	-	12/12	-	-	-	-	-	-	-	rs420091271	G	G/A	-	1	-	Uniprot_gn	-	-	-	-	-	-	-	-	-
s58169.1	0.0464828	G	A	0.4407	G	A	0.3322	0.1085	3	35259070	MODIFIER	BABAM2	ENSOARG00020004260	Transcript	ENSOART00020054975.1	protein_coding	-	-	-	-	-	-	-	-	-	rs420091271	G	G/A	1140	1	-	Uniprot_gn	-	-	-	-	-	-	-	-	-
s36882.1	0.0470991	G	A	0.4185	A	G	0.465	0.1165	5	78978547	MODIFIER	SSBP2	ENSOARG00020017360	Transcript	ENSOART00020031439.2	protein_coding	-	16/17	-	-	-	-	-	-	-	-	G	G/A	-	-1	-	HGNC	HGNC:15831	-	-	-	-	-	-	-	-
s36882.1	0.0470991	G	A	0.4185	A	G	0.465	0.1165	5	78978547	MODIFIER	SSBP2	ENSOARG00020017360	Transcript	ENSOART00020031500.2	protein_coding	-	14/15	-	-	-	-	-	-	-	-	G	G/A	-	-1	-	HGNC	HGNC:15831	-	-	-	-	-	-	-	-
s36882.1	0.0470991	G	A	0.4185	A	G	0.465	0.1165	5	78978547	MODIFIER	SSBP2	ENSOARG00020017360	Transcript	ENSOART00020031727.2	protein_coding	-	15/16	-	-	-	-	-	-	-	-	G	G/A	-	-1	-	HGNC	HGNC:15831	-	-	-	-	-	-	-	-
s36882.1	0.0470991	G	A	0.4185	A	G	0.465	0.1165	5	78978547	MODIFIER	SSBP2	ENSOARG00020017360	Transcript	ENSOART00020031735.2	protein_coding	-	15/15	-	-	-	-	-	-	-	-	G	G/A	-	-1	-	HGNC	HGNC:15831	-	-	-	-	-	-	-	-
s36882.1	0.0470991	G	A	0.4185	A	G	0.465	0.1165	5	78978547	MODIFIER	SSBP2	ENSOARG00020017360	Transcript	ENSOART00020031793.2	protein_coding	-	14/14	-	-	-	-	-	-	-	-	G	G/A	-	-1	-	HGNC	HGNC:15831	-	-	-	-	-	-	-	-
OAR21_37461947.1	0.0473957	T	C	0.3051	T	C	0.4196	0.1145	21	31793527	MODIFIER	OPCML	ENSOARG00020011005	Transcript	ENSOART00020017013.2	protein_coding	-	3/7	-	-	-	-	-	-	-	-	T	T/C	-	1	-	HGNC	HGNC:8143	-	-	-	-	-	-	-	-
OAR21_37461947.1	0.0473957	T	C	0.3051	T	C	0.4196	0.1145	21	31793527	MODIFIER	OPCML	ENSOARG00020011005	Transcript	ENSOART00020017103.2	protein_coding	-	3/8	-	-	-	-	-	-	-	-	T	T/C	-	1	-	HGNC	HGNC:8143	-	-	-	-	-	-	-	-
oar3_OAR2_82785374	0.0475548	G	A	0.4438	A	G	0.4545	0.1017	2	83366821	MODIFIER	-	-	-	-	-	-	-	-	-	-	-	-	-	-	-	G	G/A	-	-	-	-	-	-	-	-	-	-	-	-	-
OAR25_14612966.1	0.048165	A	C	0.3876	A	C	0.486	0.0984	25	13642860	MODIFIER	BICC1	ENSOARG00020021901	Transcript	ENSOART00020033893.2	protein_coding	-	19/20	-	-	-	-	-	-	-	-	A	A/C	-	1	-	HGNC	HGNC:19351	-	-	-	-	-	-	-	-
OAR25_14612966.1	0.048165	A	C	0.3876	A	C	0.486	0.0984	25	13642860	MODIFIER	BICC1	ENSOARG00020021901	Transcript	ENSOART00020033976.2	protein_coding	-	19/20	-	-	-	-	-	-	-	-	A	A/C	-	1	-	HGNC	HGNC:19351	-	-	-	-	-	-	-	-
OAR25_14612966.1	0.048165	A	C	0.3876	A	C	0.486	0.0984	25	13642860	MODIFIER	BICC1	ENSOARG00020021901	Transcript	ENSOART00020049301.1	protein_coding	-	19/20	-	-	-	-	-	-	-	-	A	A/C	-	1	-	HGNC	HGNC:19351	-	-	-	-	-	-	-	-
OAR25_14612966.1	0.048165	A	C	0.3876	A	C	0.486	0.0984	25	13642860	MODIFIER	BICC1	ENSOARG00020021901	Transcript	ENSOART00020073928.1	protein_coding	-	21/22	-	-	-	-	-	-	-	-	A	A/C	-	1	-	HGNC	HGNC:19351	-	-	-	-	-	-	-	-
OAR25_14612966.1	0.048165	A	C	0.3876	A	C	0.486	0.0984	25	13642860	MODIFIER	BICC1	ENSOARG00020021901	Transcript	ENSOART00020079821.1	protein_coding	-	21/22	-	-	-	-	-	-	-	-	A	A/C	-	1	-	HGNC	HGNC:19351	-	-	-	-	-	-	-	-
s19158.1	0.0482912	C	T	0.4326	C	T	0.3357	0.0969	12	47051082	MODIFIER	-	-	-	-	-	-	-	-	-	-	-	-	-	-	-	C	C/T	-	-	-	-	-	-	-	-	-	-	-	-	-
s29730.1	0.0487369	T	C	0.4691	T	C	0.3671	0.102	25	33779940	MODIFIER	-	ENSOARG00020032398	Transcript	ENSOART00020048352.1	protein_coding	-	5/5	-	-	-	-	-	-	-	-	T	T/C	-	-1	-	-	-	-	-	-	-	-	-	-	-
s29730.1	0.0487369	T	C	0.4691	T	C	0.3671	0.102	25	33779940	MODIFIER	-	ENSOARG00020032398	Transcript	ENSOART00020051728.1	protein_coding	-	6/9	-	-	-	-	-	-	-	-	T	T/C	-	-1	-	-	-	-	-	-	-	-	-	-	-
s29730.1	0.0487369	T	C	0.4691	T	C	0.3671	0.102	25	33779940	MODIFIER	-	ENSOARG00020032398	Transcript	ENSOART00020060051.1	protein_coding	-	4/6	-	-	-	-	-	-	-	-	T	T/C	-	-1	-	-	-	-	-	-	-	-	-	-	-
s29730.1	0.0487369	T	C	0.4691	T	C	0.3671	0.102	25	33779940	MODIFIER	-	ENSOARG00020032398	Transcript	ENSOART00020060601.1	protein_coding	-	5/10	-	-	-	-	-	-	-	-	T	T/C	-	-1	-	-	-	-	-	-	-	-	-	-	-
OAR1_156093833_X.1	0.0489718	C	T	0.4916	C	T	0.3811	0.1105	1	146995998	MODIFIER	-	-	-	-	-	-	-	-	-	-	-	-	-	-	rs409586685	C	C/T	-	-	-	-	-	-	-	-	-	-	-	-	-
s55137.1	0.0490511	G	T	0.3511	G	T	0.4472	0.0961	8	79285037	MODIFIER	-	ENSOARG00020026940	Transcript	ENSOART00020072515.1	protein_coding	-	1/1	-	-	-	-	-	-	-	-	G	G/T	-	1	-	-	-	-	-	-	-	-	-	-	-
OAR2_110417074.1	0.0498453	G	A	0.3202	G	A	0.4161	0.0959	2	103974905	MODIFIER	-	-	-	-	-	-	-	-	-	-	-	-	-	-	rs405556664	G	G/A	-	-	-	-	-	-	-	-	-	-	-	-	-
oar3_OAR17_56465544	0.0499236	T	G	0.2994	T	G	0.1937	0.1057	17	56906669	MODIFIER	-	-	-	-	-	-	-	-	-	-	-	-	-	-	-	T	T/G	-	-	-	-	-	-	-	-	-	-	-	-	-
